# Supplementary material
Source: PubMed Central journal article supplement (PMC2708677)
Supplement: 0900301106_SD1_PDF.pdf [file 0900301106_SD1_PDF.pdf]

| chr   | name      | start     | end                              | ID | chr   | name   | start  | end    | valid       | length without Ns | non-repetitive nr | length      | cpContent   | cpContent   | cpq/OE      | cpContent   | cpq/OE      | nrGCContent | nrGCContent | nrGCContent | nrGCContent | RefSeqID | version |  |
|-------|-----------|-----------|----------------------------------|----|-------|--------|--------|--------|-------------|-------------------|-------------------|-------------|-------------|-------------|-------------|-------------|-------------|-------------|-------------|-------------|-------------|----------|---------|--|
| chr1  | 2371660   | 2373825   | XM 393739                        |    | chr1  | 2166   | 2166   | 1850   | 0.284395199 | 0.147806          | 0.73077987        | 0.01893764  | 0.944377327 | 0.319459459 | 0.017344173 | 0.686184325 | 0.021680217 | 0.857730406 | XM 393739.3 |             |             |          |         |  |
| chr1  | 39898853  | 39902265  | XM 392901                        |    | chr1  | 2413   | 2413   | 1615   | 0.256941567 | 0.016169154       | 0.990895961       | 0.02461028  | 1.499047776 | 0.33869699  | 0.023613841 | 0.83370067  | 0.034825871 | 1.228611514 | XM 392901.3 |             |             |          |         |  |
| chr10 | 4279888   | 4281933   | XM 625097                        |    | chr10 | 2047   | 2047   | 1500   | 0.207620909 | 0.008797654       | 0.903900904       | 0.016129032 | 1.575384991 | 0.270666667 | 0.012096774 | 0.501076761 | 0.022774719 | 0.26764064  | XM 625097.2 |             |             |          |         |  |
| chr1  | 19682744  | 19694228  | XM 624893                        |    | chr1  | 1449   | 1449   | 814    | 0.21463078  | 0.011049874       | 0.988159598       | 0.018646409 | 1.667519322 | 0.306899337 | 0.01980198  | 0.714285637 | 0.032178218 | 1.160714161 | XM 624893.2 |             |             |          |         |  |
| chr1  | 9984476   | 9994752   | AmelG1 WGA26 2.502678.502678.m   |    | chr1  | 6313   | 6313   | 5293   | 0.250118802 | 0.019169835       | 1.228708001       | 0.017855541 | 1.27228014  | 0.28358209  | 0.023256953 | 1.116868481 | 0.020841228 | 1.041163584 |             |             |             |          |         |  |
| chr1  | 2801329   | 2802327   | AmelG1 WGA26 2.502678.502678.m   |    | chr1  | 6317   | 6317   | 5295   | 0.214148339 | 0.004020349       | 0.994021888       | 0.017855541 | 1.27228014  | 0.28358209  | 0.023256953 | 1.116868481 | 0.020841228 | 1.041163584 |             |             |             |          |         |  |
| chr4  | 2164881   | 2182496   | AmelG4 WGA131 2.503412.503412.m  |    | chr4  | 17616  | 17566  | 16312  | 0.375593547 | 0.059610567       | 1.687537953       | 0.037861355 | 1.071836427 | 0.395904855 | 0.036516825 | 1.6241109   | 0.0405895   | 1.036323292 | -           |             |             |          |         |  |
| chr1  | 2604887   | 12969516  | XM 397223                        |    | chr1  | 9030   | 8980   | 5982   | 0.228285078 | 0.01296325        | 1.479824444       | 0.018155491 | 1.394283574 | 0.303243063 | 0.028459358 | 1.229758019 | 0.023699865 | 1.149238149 | XM 397223.3 |             |             |          |         |  |
| chr1  | 112410907 | 112413943 | AmelG1 WGA2232 2.501462.501462.m |    | chr1  | 1037   | 1037   | 801    | 0.222572956 | 0.004862655       | 0.395278359       | 0.01839768  | 1.502057575 | 0.269662921 | 0.006273526 | 0.349401074 | 0.023839398 | 1.327724082 |             |             |             |          |         |  |
| chr1  | 5641018   | 5643390   | XM 624497                        |    | chr1  | 2373   | 2373   | 1791   | 0.252430983 | 0.01433895        | 0.911242231       | 0.023817184 | 1.474068315 | 0.307091011 | 0.00689885  | 0.818564341 | 0.02916433  | 1.251921934 | XM 624497.2 |             |             |          |         |  |
| chr1  | 2215683   | 2218462   | XM 391837                        |    | chr1  | 2780   | 2780   | 2578   | 0.334532374 | 0.039222744       | 1.012471943       | 0.028787334 | 1.042949014 | 0.357253685 | 0.047173441 | 1.344636316 | 0.031104190 | 0.986688558 | XM 391837.3 |             |             |          |         |  |
| chr13 | 3664033   | 3664728   | AmelG1 WGA397 2.504715.504715.m  |    | chr13 | 131690 | 124989 | 124989 | 0.368689714 | 0.062513289       | 1.592661595       | 0.038810334 | 1.008814621 | 0.314681595 | 0.025989164 | 0.031050127 | 0.036635289 | 0.100515091 | 0.986688558 | XM 391320.3 |             |          |         |  |
| chr1  | 7080632   | 7084750   | XM 391720                        |    | chr1  | 4111   | 4111   | 3259   | 0.216309859 | 0.016273989       | 0.918217148       | 0.018217148 | 1.53141859  | 0.298881604 | 0.025989164 | 0.031050127 | 0.036635289 | 0.100515091 | 0.986688558 | XM 391720.3 |             |          |         |  |
| chr1  | 4779989   | 4885366   | XM 393942                        |    | chr1  | 5380   | 5380   | 5228   | 0.502416357 | 0.089793642       | 1.433564126       | 0.060420152 | 0.964613543 | 0.506312159 | 0.009493902 | 1.433195688 | 0.06107601  | 0.962504052 | XM          |             |             |          |         |  |



































































| chromosome | start     | end       | ID              | lenqth            | valid  | length without Ns | non-repetitive | nr | lenqth | qcContent   | cpaContent  | cpdqO/E     | qcContent   | apcqO/E     | nrCpContent | nrCpGContent | nrCpGGO/E   | nrGpCCContent | nrGpCCO/E    | RefSeqID    | version |
|------------|-----------|-----------|-----------------|-------------------|--------|-------------------|----------------|----|--------|-------------|-------------|-------------|-------------|-------------|-------------|--------------|-------------|---------------|--------------|-------------|---------|
| chr2       | 5026372   | 5030099   | AmelG2 WGA74    | 2.501060.501060.m | 3728   | 3728              |                |    | 3076   | 0.233360999 | 0.008585994 | 0.0395224   | 0.01395224  | 1.024797131 | 0.262028609 | 0.010104302  | 0.588898005 | 0.015645372   | 0.911842073  | -           |         |
| chrUn      | 11123756  | 11126094  | XM 624960       |                   | 2339   | 2339              |                |    | 2194   | 0.348867037 | 0.019674936 | 0.650884473 | 0.037639008 | 1.245170296 | 0.366909978 | 0.020994997  | 0.627910463 | 0.040164309   | 1.01220015   | XM 624960.2 |         |
| chr8       | 9468858   | 9468767   | AmelG8 WGA280   | 2.503110.503110.m | 19939  | 19389             |                |    | 18448  | 0.361132601 | 0.056535644 | 0.031414423 | 0.246384103 | 0.372452298 | 0.059286606 | 0.033009392  | 0.709712434 | 0.951930474   | -            |             |         |
| chr10      | 3246877   | 3247069   | AmelG10 WGA319  | 2.513046.513046.m | 833    | 833               |                |    | 833    | 0.242496999 | 0.015254117 | 0.168257273 | 0.153756603 | 0.317114094 | 0.021859459 | 0.082392687  | 0.023640649 | 0.950269047   | -            |             |         |
| chrUn      | 31593988  | 31597101  | XM 392779       |                   | 3114   | 3114              |                |    | 2736   | 0.280346821 | 0.014458509 | 0.748694169 | 0.024413749 | 1.26461263  | 0.308479532 | 0.016483516  | 0.707174259 | 0.047272527   | 1.76267365   | XM 392779.3 |         |
| chr11      | 9243395   | 9249428   | AmelG11 WGA364  | 2.502702.502702.m | 6034   | 6034              |                |    | 5113   | 0.356314219 | 0.045748384 | 1.442068731 | 0.037460633 | 1.180824396 | 0.04778408  | 0.053550412  | 1.289169491 | 0.044134955   | 1.065202698  | -           |         |
| chrUn      | 25369442  | 25374534  | XM 393653       |                   | 5093   | 5093              |                |    | 3915   | 0.23502847  | 0.006087981 | 0.442321284 | 0.018656716 | 1.355500708 | 0.285823755 | 0.007956879  | 0.391539978 | 0.02412731    | 1.187250257  | XM 393653.3 |         |
| chrUn      | 34325463  | 34333391  | XM 625127       |                   | 7929   | 7929              |                |    | 7525   | 0.324126624 | 0.014001009 | 0.033047427 | 0.269888829 | 0.33833887  | 0.020797736 | 0.034840426  | 1.229270331 | 1.28270331    | XM 625127.1  |             |         |
| chrUn      | 8994865   | 8997807   | XM 623832       |                   | 2943   | 2943              |                |    | 2440   | 0.245327897 | 0.00917743  | 0.615727902 | 0.020054385 | 1.345479489 | 0.280737705 | 0.011092851  | 0.568762267 | 0.023829088   | 1.22178561   | XM 623832.2 |         |
| chrUn      | 16158998  | 16160289  | XM 624779       |                   | 1292   | 1292              |                |    | 983    | 0.218266254 | 0.000774593 | 0.06578148  | 0.019364833 | 1.645370005 | 0.278738555 | 0.001023541  | 0.053251324 | 0.025588536   | 1.331283109  | -           |         |
| chr1       | 5957253   | 5959894   | XM 394224       |                   | 2642   | 2642              |                |    | 2642   | 0.447766843 | 0.046573268 | 0.937611444 | 0.043544112 | 0.703028992 | 0.047766843 | 0.046573268  | 0.937611444 | 0.043544112   | 0.943028992  | XM 394224.2 |         |
| chrUn      | 21876029  | 21877845  | XM 393027       |                   | 1817   | 1817              |                |    | 1494   | 0.257017061 | 0.011132216 | 0.667033774 | 0.02092511  | 1.26736417  | 0.301874163 | 0.013422819  | 0.589419925 | 0.024882215   | 1.09042686   | -           |         |
| chr6       | 4564312   | 4653411   | XM 395219       |                   | 89100  | 86776             |                |    | 87612  | 0.354735514 | 0.050702924 | 1.612298944 | 0.06752265  | 0.367050504 | 0.053190089 | 1.579896657  | 0.031751349 | 0.943015022   | -            |             |         |
| chrUn      | 41581693  | 41582853  | XM 396639       |                   | 1161   | 1161              |                |    | 1031   | 0.276485788 | 0.006896552 | 0.366272927 | 0.023275862 | 1.23617113  | 0.303588749 | 0.007797271  | 0.345543022 | 0.026315789   | 1.1662077    | XM 396639.2 |         |
| chrUn      | 53984040  | 53995382  | XM 396007       |                   | 11343  | 10523             |                |    | 6588   | 0.200893281 | 0.00998004  | 0.992453751 | 0.014067104 | 1.398887191 | 0.273679417 | 0.014977839  | 0.801497703 | 0.020479902   | 1.095925431  | XM 396007.3 |         |
| chrUn      | 320106320 | 320107250 | XM 624543       |                   | 931    | 931               |                |    | 676    | 0.248120301 | 0.008602151 | 0.573627374 | 0.01827957  | 1.218958169 | 0.313609467 | 0.011904762  | 0.510336818 | 0.025297619   | 1.084465789  | -           |         |
| chr5       | 11545051  | 11548394  | AmelG5 WGA171   | 2.506263.506263.m | 3344   | 3294              |                |    | 2606   | 0.241347905 | 0.023390036 | 1.607337067 | 0.017314702 | 1.18984692  | 0.277052955 | 0.028912876  | 1.506696261 | 0.021973786   | 1.1450509159 | -           |         |
| chr15      | 3001386   | 3006213   | AmelG15 WGA432  | 2.524764.524764.m | 1228   | 1228              |                |    | 1057   | 0.285016287 | 0.004889976 | 0.324077693 | 0.020374898 | 1.01282372  | 0.332350049 | 0.005923001  | 1.26684167  | 0.024679171   | 0.902850696  | -           |         |
| chrUn      | 25362428  | 25364021  | XM 624366       |                   | 1594   | 1594              |                |    | 1200   | 0.237766625 | 0.012554928 | 0.892208216 | 0.013182674 | 0.936818627 | 0.291666667 | 0.016736402  | 0.79358617  | 0.017573222   | 0.833265479  | XM 624366.2 |         |
| chrUn      | 5326318   | 5367942   | XM 395185       |                   | 41625  | 40619             |                |    | 36161  | 0.28582683  | 0.034470023 | 1.688341052 | 0.02014646  | 0.987679515 | 0.313051764 | 0.03897381   | 1.592067994 | 0.022563786   | 0.921723575  | XM 395185.3 |         |
| chr12      | 7698244   | 7927889   | XM 391941       |                   | 229646 | 227227            |                |    | 218504 | 0.432809481 | 0.074381984 | 1.588340596 | 0.042095951 | 0.989090993 | 0.493446648 | 0.07687092   | 1.592974695 | 0.04347265    | 0.90067272   | XM 391941.2 |         |
| chrUn      | 51841170  | 51843671  | XM 623938       |                   | 2502   | 2502              |                |    | 17354  | 0.229816147 | 0.004398241 | 0.340190827 | 0.017592963 | 1.360763308 | 0.299382599 | 0.006165919  | 0.283851697 | 0.023542601   | 1.08379739   | XM 623938.2 |         |
| chr7       | 5814560   | 5816998   | XM 396252       |                   | 2439   | 2439              |                |    | 1847   | 0.282082821 | 0.023789992 | 1.238795726 | 0.028712059 | 0.495098291 | 0.342176502 | 0.03153888   | 1.111131957 | 0.037520392   | 1.321863879  | XM 396252.2 |         |
| chrUn      | 4220214   | 4224988   | XM 392558       |                   | 4775   | 4775              |                |    | 4147   | 0.277068063 | 0.010892333 | 0.574846333 | 0.021883494 | 1.381842146 | 0.309380275 | 0.012566457  | 0.531949555 | 0.029966167   | 1.268495093  | XM 392558.3 |         |
| chr5       | 10654443  | 10657055  | XM 623360       |                   | 2613   | 2613              |                |    | 1795   | 0.216609261 | 0.008039816 | 0.69320244  | 0.013016845 | 1.12232776  | 0.288022284 | 0.011784512  | 0.57374987  | 0.019079686   | 0.943756933  | XM 623360.2 |         |
| chr15      | 3785392   | 37857059  | AmelG15 WGA433  | 2.503055.503055.m | 6046   | 6046              |                |    | 5984   | 0.212678937 | 0.005423261 | 0.727272636 | 0.014950363 | 1.227122642 | 0.327194654 | 0.010071632  | 0.52894658  | 0.01956368    | 1.451632643  | -           |         |
| chrUn      | 56178864  | 56188242  | XM 624099       |                   | 9379   | 9379              |                |    | 7242   | 0.226381462 | 0.007898087 | 0.60788687  | 0.017487737 | 1.331477631 | 0.280999724 | 0.010257832  | 0.526544132 | 0.02594954    | 1.159620183  | -           |         |
| chr10      | 9110      | 35316     | XM 397461       |                   | 26207  | 26207             |                |    | 23938  | 0.29652383  | 0.04533313  | 0.20628058  | 0.023048157 | 0.948765596 | 0.316233603 | 0.049146015  | 1.966347917 | 0.025200938   | 1.008297654  | XM 397461.2 |         |
| chrUn      | 266143495 | 266144361 | AmelGUn WGA6222 | 2.513011.513011.m | 867    | 867               |                |    | 867    | 0.497116494 | 0.033487298 | 0.544166057 | 0.05737621  | 1.038271734 | 0.497116494 | 0.033487298  | 0.544166057 | 0.05737621    | 1.038271734  | -           |         |
| chrUn      | 9091994   | 9096067   | AmelGUn WGA491  | 2.504482.504482.m | 4074   | 4074              |                |    | 3043   | 0.213058491 | 0.004419347 | 0.392273283 | 0.014856337 | 1.285784651 | 0.255340125 | 0.005946482  | 0.367393861 | 0.019160885   | 1.183824663  | -           |         |
| chr15      | 500539    | 880715    | AmelG15 WGA426  | 2.503387.503387.m | 380177 | 351533            |                |    | 329873 | 0.388836894 | 0.064362407 | 1.702949623 | 0.034908135 | 0.362266039 | 0.399220306 | 0.067923532  | 1.704803425 | 0.036834788   | 0.924511309  | -           |         |
| chrUn      | 58992456  | 58994622  | XM 395864       |                   | 2077   | 2077              |                |    | 1524   | 0.232065479 | 0.010597303 | 0.8040666   | 0.01541258  | 1.169551418 | 0.279527559 | 0.012516469  | 0.657509117 | 0.020421607   | 1.07278033   | XM 395864.3 |         |
| chrUn      | 17372686  | 17373288  | AmelGUn WGA554  | 2.518516.518516.m | 603    | 603               |                |    | 359    | 0.217296849 | 0.003322259 | 0.322134219 | 0.014950166 | 1.449603987 | 0.30362117  | 0.005633803  | 0.255845716 | 0.025352113   | 1.15130572   | -           |         |
| chrUn      | 5589268   | 5590598   | AmelGUn WGA1241 | 2.504971.504971.m | 6006   | 6006              |                |    | 5861   | 0.217158931 | 0.005423261 | 0.727272636 | 0.014950363 | 1.227122642 | 0.327194654 | 0.010071632  | 0.52894658  | 0.01956368    | 1.451632643  | -           |         |
| chr10      | 9759905   | 9760973   | AmelG10 WGA338  | 2.501360.501360.m | 1069   | 1069              |                |    | 1069   | 0.619270346 | 0.102059925 | 1.064871966 | 0.082397004 | 0.859713147 | 0.619270346 | 0.102059925  | 1.064871966 | 0.082397004   | 0.859713147  | -           |         |
| chr2       | 2826573   | 2828497   | XM 392760       |                   | 1925   | 1925              |                |    | 1375   | 0.203636364 | 0.005197505 | 0.504307434 | 0.017671518 | 1.14645274  | 0.256       | 0.007309942  | 0.44900449  | 0.04212807    | 1.081714815  | XM 392760.3 |         |
| chrUn      | 96742972  | 96746498  | XM 395147       |                   | 3527   | 3527              |                |    | 2953   | 0.272469521 | 0.010777085 | 0.602020795 | 0.023823029 | 1.330782809 | 0.315272604 | 0.012911995  | 0.540025377 | 0.027862725   | 1.16531792   | XM 395147.2 |         |
| chr15      | 2296873   | 2299829   | XM 392065       |                   | 2597   | 2597              |                |    | 2659   | 0.319918837 | 0.030108254 | 1.179024535 | 0.03456089  | 1.35214601  | 0.343738247 | 0.033572237  | 1.137934392 | 0.038476047   | 1.301494528  | XM 392065.3 |         |
| chr2       | 6167975   | 6202645   | XM 392230       |                   | 34671  | 33873             |                |    | 32977  | 0.376671685 | 0.06076271  | 1.712074171 | 0.033128617 | 0.93431265  | 0.384055554 | 0.062315981  | 1.690248829 | 0.0339657     | 0.921280003  | XM 392230.3 |         |
| chr7       | 1679291   | 16806224  | XM 394671       |                   | 1334   | 1334              |                |    | 1276   | 0.344827586 | 0.052513128 | 1.77624551  | 0.024006002 | 0.811997947 | 0.35815047  | 0.054160126  | 1.698882916 | 0.025117739   | 0.787887729  | XM 394671.2 |         |
| chrUn      | 33837632  | 33837699  | XM 392711       |                   | 35827  | 35828             |                |    | 3278   | 0.285272312 | 0.009453307 | 0.894583067 | 0.02191032  | 1.392103262 | 0.444302612 | 0.044302612  | 0.742912652 | 0.955461305   | 1.03927113   | XM 392711.3 |         |
| chrUn      | 180698500 | 180699096 | AmelGUn WGA4000 | 2.507479.507479.m | 597    | 597               |                |    | 597    | 0.324958124 | 0.010067114 | 0.38464945  | 0.027881461 | 1.666814282 | 0.324958124 | 0.010067114  | 0.38464945  | 0.043624161   | 1.666814282  | -           |         |
| chr2       | 631132    | 634134    | XM 395805       |                   | 3003   | 3003              |                |    | 2945   | 0.361638362 | 0.051963556 | 1.621898505 | 0.027961361 | 0.83737681  | 0.367741935 | 0.053025153  | 1.600335725 | 0.028552005   | 0.861719236  | -           |         |
| chr11      | 3548214   | 3557958   | XM 623785       |                   | 9745   | 9745              |                |    | 9460   | 0.382555156 | 0.062910509 | 1.71973368  | 0.033148604 | 0.960156573 | 0.384355518 | 0.063915344  | 1.730612262 | 0.033333333   | 0.920554408  | XM 623785.2 |         |
| chrUn      | 57235334  | 57236257  | AmelGUn WGA1096 | 2.513639.513639.m | 924    | 924               |                |    | 652    | 0.260822511 | 0.009750813 | 0.575567599 | 0.026002167 | 1.53484693  | 0.338858971 | 0.013867488  | 0.492903412 | 0.035493137   | 1.259642053  | -           |         |
| chr4       | 9427216   | 9429951   | XM 395929       |                   | 2736   | 2736              |                |    | 2188   | 0.259868421 | 0.014990859 | 0.897391522 | 0.021937843 | 1.313255885 | 0.317184644 | 0.01882461   | 0.75        |               |              |             |         |

| chromosome | start     | end       | ID              | length | valid length | without Ns | nr length   | qcContent   | cpaContent   | cpqQ/E      | qpcContent   | apqcQ/E      | nrGCContent  | nrCpGContent | nrCpGQ/E    | nrGpCQ/E     | RefSeqID    | version |
|------------|-----------|-----------|-----------------|--------|--------------|------------|-------------|-------------|--------------|-------------|--------------|--------------|--------------|--------------|-------------|--------------|-------------|---------|
| chrUn      | 18270422  | 18272227  | AmelGUn WGA562  | 1806   | 1806         | 1626       | 0.250276855 | 0.018836565 | 0.206275403  | 0.014404432 | 0.0922445897 | 0.271832718  | 0.020345253  | 0.103595033  | 0.01541307  | 0.836056844  | -           | -       |
| chrUn      | 14011549  | 14019060  | Xm 395281       | 7512   | 7462         | 5017       | 0.248860895 | 0.202643432 | 0.348612949  | 0.024262735 | 0.584535057  | 0.332270281  | 0.030242339  | 0.111122073  | 0.034848788 | 1.280479508  | Xm 395281.3 | -       |
| chrUn      | 43312838  | 43313591  | Xm 624917       | 754    | 754          | 630        | 0.270557029 | 0.025232404 | 0.138916722  | 0.01062417  | 0.314285714  | 0.031485714  | 0.030351438  | 0.12311759   | 0.01182109  | 0.453566939  | -           | -       |
| chrUn      | 91710645  | 91722990  | Xm 624554       | 4346   | 4346         | 2238       | 0.205016107 | 0.012187929 | 0.116666728  | 0.013808076 | 0.130754787  | 0.311885612  | 0.023423423  | 0.07307327   | 0.02873874  | 0.989038429  | Xm 624554.2 | -       |
| chr13      | 256005    | 256047    | Xm 391947       | 6443   | 6443         | 6139       | 0.407100849 | 0.058832661 | 0.41992629   | 0.047345545 | 0.142684745  | 0.041279923  | 0.061563948  | 0.387175505  | 0.049575302 | 0.119281823  | Xm 391947.3 | -       |
| chr10      | 2341743   | 2342789   | AmelG10 WGA313  | 7047   | 7047         | 6684       | 0.29360014  | 0.035764973 | 0.165687599  | 0.023275617 | 0.084018914  | 0.307151406  | 0.067758466  | 0.160687589  | 0.02457297  | 0.1045744561 | -           | -       |
| chrUn      | 19067287  | 19071770  | AmelGUn WGA568  | 4484   | 4484         | 4269       | 0.288135593 | 0.010930181 | 0.530747466  | 0.021637296 | 0.1050663351 | 0.299133286  | 0.011498515  | 0.15775393   | 0.022748593 | 0.1024941454 | -           | -       |
| chr11      | 508838    | 512469    | Xm 393260       | 3632   | 3632         | 2791       | 0.265969163 | 0.023684935 | 0.349974748  | 0.021206279 | 0.120869781  | 0.321031888  | 0.029586155  | 0.165482052  | 0.026258993 | 0.1025062528 | -           | -       |
| chrUn      | 108935562 | 108939134 | Xm 392799       | 3573   | 3573         | 2315       | 0.217184439 | 0.014837626 | 0.1271092481 | 0.010078387 | 0.863383572  | 0.293304536  | 0.022164276  | 0.1040097932 | 0.015210778 | 0.713792698  | Xm 392799.3 | -       |
| chr15      | 4139141   | 4148857   | Xm 393172       | 9717   | 9717         | 9075       | 0.418236081 | 0.06453273  | 0.1476212712 | 0.042610128 | 0.074724183  | 0.4929201102 | 0.067667513  | 0.1469329277 | 0.044817939 | 0.973161288  | Xm 393172.3 | -       |
| chrUn      | 40343434  | 40363807  | Xm 625264       | 20464  | 20363        | 13419      | 0.217109463 | 0.020404277 | 0.700654513  | 0.014539025 | 0.32037915   | 0.288620613  | 0.029076739  | 0.1396452951 | 0.021357914 | 0.02574508   | -           | -       |
| chr10      | 2998799   | 3000605   | Xm 623891       | 1807   | 1807         | 1510       | 0.236856669 | 0.002488739 | 0.161302603  | 0.013289307 | 0.967815619  | 0.274172185  | 0.002657807  | 0.143876221  | 0.015946844 | 0.865327328  | Xm 623891.1 | -       |
| chrUn      | 14137572  | 14139674  | AmelGUn WGA525  | 2103   | 2103         | 1484       | 0.223490252 | 0.024738344 | 0.2007634032 | 0.015699334 | 0.127407545  | 0.293126685  | 0.034552846  | 0.1629217047 | 0.023257724 | 0.1054193625 | -           | -       |
| chr3       | 10086966  | 10088625  | Xm 624330       | 1660   | 1660         | 1141       | 0.236746988 | 0.012658228 | 0.91058875   | 0.018083183 | 0.1300841071 | 0.319894829  | 0.018534863  | 0.732016328  | 0.026478376 | 0.1045737611 | Xm 624330.1 | -       |
| chr15      | 910356    | 912005    | Xm 393179       | 1650   | 1650         | 1187       | 0.226666667 | 0.014554275 | 0.193314698  | 0.015160703 | 0.243036144  | 0.295703454  | 0.019524618  | 0.946061679  | 0.021222411 | 0.1028327912 | Xm 393179.3 | -       |
| chrUn      | 22983856  | 22988365  | AmelGUn WGA609  | 4510   | 4510         | 4036       | 0.282926829 | 0.040585496 | 0.205207041  | 0.020181859 | 0.120248455  | 0.304757185  | 0.043953315  | 0.911778139  | 0.022349143 | 0.972090579  | -           | -       |
| chr9       | 1472660   | 1475900   | Xm 394976       | 3241   | 3241         | 2383       | 0.251157005 | 0.016358025 | 0.083440104  | 0.018518519 | 0.126253966  | 0.319765002  | 0.022353437  | 0.913750496  | 0.024884015 | 0.101793948  | Xm 394976.3 | -       |
| chrUn      | 11007931  | 11010587  | AmelGUn WGA504  | 2557   | 2557         | 819        | 0.240496801 | 0.016566265 | 0.149970664  | 0.021837349 | 0.1515870421 | 0.298281092  | 0.021384929  | 0.973610494  | 0.031568228 | 0.1437234539 | -           | -       |
| chr7       | 518239    | 523240    | Xm 393011       | 5002   | 4949         | 3821       | 0.279248333 | 0.023448555 | 0.121941592  | 0.019001415 | 0.982090601  | 0.335514263  | 0.029944838  | 0.1071650434 | 0.023903336 | 0.855440258  | Xm 393011.3 | -       |
| chr6       | 6280149   | 6281791   | Xm 624217       | 1643   | 1643         | 986        | 0.192331102 | 0.005481121 | 0.655761054  | 0.01789281  | 0.330116243  | 0.311274551  | 0.009913259  | 0.440847056  | 0.022304893 | 0.105905877  | Xm 624217.2 | -       |
| chr1       | 10799663  | 10802260  | Xm 393232       | 2598   | 2598         | 2249       | 0.2852194   | 0.008471313 | 0.417175022  | 0.028494417 | 0.430225073  | 0.317029791  | 0.009812667  | 0.390862333  | 0.031668153 | 0.1261419349 | Xm 393232.3 | -       |
| chr11      | 6432102   | 6432306   | Xm 393789       | 1105   | 1105         | 770        | 0.249773756 | 0.00634058  | 0.028327325  | 0.023550725 | 0.159022164  | 0.328571429  | 0.009138381  | 0.355381491  | 0.032637076 | 0.126911963  | Xm 393789.2 | -       |
| chr3       | 8963465   | 8967633   | Xm 394434       | 4169   | 4169         | 3892       | 0.356680259 | 0.028071017 | 0.895276769  | 0.036948177 | 0.178398482  | 0.374100719  | 0.029562982  | 0.856908536  | 0.038560411 | 0.117766787  | Xm 394434.3 | -       |
| chr12      | 5435325   | 5437420   | Xm 395787       | 3896   | 3896         | 3202       | 0.264117043 | 0.008472401 | 0.490173654  | 0.023876765 | 0.38139879   | 0.309226933  | 0.010325407  | 0.43691788   | 0.029998874 | 0.1231314026 | Xm 395787.3 | -       |
| chr2       | 5535615   | 5543094   | AmelG2 WGA75    | 7480   | 7480         | 7360       | 0.39973262  | 0.064045995 | 0.160516068  | 0.034095467 | 0.854521827  | 0.404755435  | 0.065116911  | 0.1592105294 | 0.034665579 | 0.847571712  | -           | -       |
| chr13      | 14589371  | 14590239  | Xm 393908       | 30598  | 30598        | 2601       | 0.415813715 | 0.023448555 | 0.121941592  | 0.019001415 | 0.982090601  | 0.335514263  | 0.029944838  | 0.1071650434 | 0.023903336 | 0.855440258  | Xm 393908.3 | -       |
| chr2       | 11162511  | 11164466  | AmelGUn WGA84   | 1956   | 1956         | 1057       | 0.014322254 | 0.05184862  | 0.016877995  | 0.003964445 | 0.033466044  | 0.309366131  | 0.013346044  | 0.558040949  | 0.014299333 | 0.94791016   | -           | -       |
| chrUn      | 18446647  | 18450031  | AmelGUn WGA564  | 3385   | 3385         | 2816       | 0.257902511 | 0.024826256 | 0.1498735482 | 0.020390071 | 0.1231104146 | 0.296519886  | 0.029568935  | 0.135064518  | 0.024225511 | 0.1106552627 | -           | -       |
| chr10      | 4885871   | 4887217   | Xm 396082       | 1347   | 1347         | 1047       | 0.28359317  | 0.005943359 | 0.304701795  | 0.019316493 | 0.990280835  | 0.324884432  | 0.007670182  | 0.267706404  | 0.024928092 | 0.700545812  | Xm 396082.2 | -       |
| chrUn      | 13391726  | 13396214  | Xm 393413       | 4489   | 4489         | 3561       | 0.233459568 | 0.016934046 | 0.1242571168 | 0.015819964 | 0.162398144  | 0.275484414  | 0.021162528  | 0.116382877  | 0.019496526 | 0.1027072247 | Xm 393413.3 | -       |
| chr8       | 1791028   | 1793521   | AmelG8 WGA256   | 2494   | 2494         | 2207       | 0.297113071 | 0.019253911 | 0.02928199   | 0.024809966 | 0.323669189  | 0.32699169   | 0.021808269  | 0.033166742  | 0.127455774 | -            | -           |         |
| chr13      | 8107174   | 8108194   | AmelG13 WGA404  | 1021   | 1021         | 1021       | 0.597457447 | 0.01960784  | 0.152999457  | 0.068627451 | 0.776057327  | 0.597453477  | 0.101960784  | 0.152999457  | 0.068627451 | 0.776057327  | -           | -       |
| chr11      | 1946741   | 1950168   | Xm 623428       | 3428   | 3428         | 2601       | 0.259626604 | 0.010213014 | 0.606087438  | 0.022466631 | 0.133329265  | 0.025463478  | 0.0313523957 | 0.157528849  | 0.027782071 | 0.805324893  | Xm 623428.2 | -       |
| chrUn      | 14589371  | 14590239  | Xm 393908       | 30598  | 30598        | 2601       | 0.415813715 | 0.023448555 | 0.121941592  | 0.019001415 | 0.982090601  | 0.335514263  | 0.029944838  | 0.1071650434 | 0.023903336 | 0.855440258  | Xm 393908.3 | -       |
| chr8       | 6467770   | 6469863   | Xm 397085       | 2094   | 2094         | 1627       | 0.230659026 | 0.008122312 | 0.61222812   | 0.017200191 | 0.315541901  | 0.280270436  | 0.010500309  | 0.544116984  | 0.022235948 | 0.152247731  | Xm 397085.3 | -       |
| chr9       | 3714166   | 3800621   | Xm 392536       | 86456  | 86060        | 81051      | 0.39420172  | 0.06509639  | 0.1677137321 | 0.035627549 | 0.093474782  | 0.30491852   | 0.068275325  | 0.1674951264 | 0.032635511 | 0.146160878  | Xm 392536.3 | -       |
| chr4       | 1455295   | 1460481   | Xm 623689       | 5187   | 5187         | 4117       | 0.25988047  | 0.018125723 | 0.1092565375 | 0.018511377 | 0.115811447  | 0.308719942  | 0.022433553  | 0.961449508  | 0.023165082 | 0.992801122  | Xm 623689.2 | -       |
| chr8       | 4312820   | 4315008   | Xm 394738       | 2189   | 2189         | 1643       | 0.270899954 | 0.012340037 | 0.06509639   | 0.021023766 | 0.120283198  | 0.326579428  | 0.016493586  | 0.60961698   | 0.02748931  | 0.1016102829 | Xm 394738.2 | -       |
| chr13      | 8107837   | 81082928  | Xm 394444       | 4692   | 4692         | 4158       | 0.284313725 | 0.014495843 | 0.727257015  | 0.022806935 | 0.144360303  | 0.315295933  | 0.016401351  | 0.668810703  | 0.02566811  | 0.104255786  | Xm 394444.2 | -       |
| chr2       | 6426757   | 6428084   | AmelG2 WGA76    | 1328   | 1328         | 1292       | 0.325301205 | 0.03089676  | 0.127380426  | 0.037882442 | 0.095362824  | 0.335931331  | 0.031782946  | 0.186415473  | 0.026882171 | 0.706576522  | -           | -       |
| chr12      | 5242764   | 5243949   | Xm 393949       | 17992  | 17992        | 1292       | 0.425975623 | 0.068535568 | 0.127380426  | 0.037882442 | 0.095362824  | 0.335931331  | 0.031782946  | 0.186415473  | 0.026882171 | 0.706576522  | Xm 393949.3 | -       |
| chr16      | 4356670   | 4384263   | Xm 624399       | 17594  | 17270        | 13140      | 0.250318471 | 0.020442437 | 0.134989827  | 0.019400406 | 0.247936527  | 0.30585997   | 0.026580785  | 0.142675033  | 0.024940457 | 0.073521789  | Xm 624399.1 | -       |
| chr10      | 2459907   | 2463045   | Xm 393681       | 3139   | 3139         | 2789       | 0.269194011 | 0.017208413 | 0.958691988  | 0.019575808 | 0.100734201  | 0.296522051  | 0.019403521  | 0.604456599  | 0.021918793 | 0.100574862  | Xm 393681.2 | -       |
| chr11      | 1361077   | 1364198   | Xm 623679       | 3122   | 3122         | 2650       | 0.255925689 | 0.013777635 | 0.846085973  | 0.02467158  | 0.151502789  | 0.292075472  | 0.016294051  | 0.766959385  | 0.028798787 | 0.135556123  | Xm 623679.2 | -       |
| chrUn      | 30864971  | 308650535 | AmelGUn WGA7332 | 817    | 817          | 817        | 0.35737317  | 0.029411765 | 0.061505995  | 0.035539216 | 0.161819744  | 0.35373317   | 0.029411765  | 0.061505995  | 0.035539216 | 0.161819744  | -           | -       |
| chrUn      | 30629140  | 30630893  | Xm 395548       | 1754   | 1754         | 1271       | 0.225766606 | 0.00855676  | 0.026780066  | 0.018254421 | 0.135473206  | 0.284028324  | 0.011857708  | 0.589942312  | 0.025296443 | 0.125845399  | Xm 395548.3 | -       |
| chrUn      | 103738170 | 103739819 | AmelGUn WGA2008 | 1650   | 1650         | 1650       | 0.346060606 | 0.033959976 | 0.163847356  | 0.035172832 | 0.105433333  | 0.346060606  | 0.033959976  | 0.163847356  | 0.035172832 | 0.105433333  | -           | -       |
| chr1       | 8019113   | 8022403   | Xm 392145       | 3291   | 3291         | 3081       | 0.352476451 | 0.050151976 | 0.1629336483 | 0.027659574 | 0.989603758  | 0.365465758  | 0.053333333  | 0.1608917166 | 0.029593496 | 0.892752818  | Xm 392145.3 | -       |
| chrUn      | 199136295 | 199144720 | Xm 396122       | 6378   | 6378         | 3081       | 0.          |             |              |             |              |              |              |              |             |              |             |         |

| chromosome | start     | end         | ID              | length   | valid length | length without Ns | non-repetitive | nr length | qcContent   | cpqContent  | cpqQ/E       | qpcContent  | apqc/E      | nrGContent  | nrCpGContent | nrCpGQ/E    | nrGpCContent | nrGpCQ/E    | RefSeqID    | version |
|------------|-----------|-------------|-----------------|----------|--------------|-------------------|----------------|-----------|-------------|-------------|--------------|-------------|-------------|-------------|--------------|-------------|--------------|-------------|-------------|---------|
| chrUn      | 21262183  | 21266323    | XM 392592       | 4141     | 4141         |                   | 2311           |           | 0.1922241   | 0.015217391 | 0.65072125   | 0.013285204 | 0.441105853 | 0.275205539 | 0.026155187  | 1.385789274 | 0.02667829   | 1.201017371 | XM 392592.3 |         |
| chr11      | 418193    | 424225      | XM 396542       | 6033     | 6033         |                   | 5287           |           | 0.311950937 | 0.027188329 | 0.140688772  | 0.027022546 | 1.133733353 | 0.335540004 | 0.030538695  | 1.104192155 | 0.030349014  | 1.097338191 | XM 396542.3 |         |
| chrUn      | 54247888  | 54252226    | XM 624735       | 4039     | 4239         |                   | 1991           |           | 0.164425572 | 0.00401322  | 0.6086497    | 0.010387158 | 0.276745354 | 0.00862069  | 0.461212947  | 0.019776876 | 0.05807676   | XM 624735.2 |             |         |
| chr1       | 17472302  | 17510158    | XM 396945       | 3697     | 3697         |                   | 3857           |           | 0.493564906 | 0.04954906  | 0.49348425   | 0.049577439 | 0.821044467 | 0.49320354  | 1.557282024  | 0.052726285 | 0.049320354  | XM 396945.3 |             |         |
| chr10      | 4685648   | 4715275     | AmelG10 WGA320  | 250856   | 500856.m     | 29628             | 29169          |           | 0.455997806 | 0.076116026 | 0.46434003   | 0.047109648 | 0.906307749 | 0.458099344 | 0.078683886  | 1.500555551 | 0.048646884  | 0.927735548 |             |         |
| chrUn      | 95725998  | 95727430    | AmelGUn WGA1834 | 2.507805 | 507805.m     | 1433              | 1433           |           | 0.360781577 | 0.030029733 | 0.92610606   | 0.043296891 | 0.363116501 | 0.360781577 | 0.030027933  | 0.92610606  | 0.043296891  | 1.337516501 |             |         |
| chr9       | 9848749   | 9890930     | AmelG9 WGA304   | 2.502448 | 502448.m     | 41282             | 40785          |           | 0.238715214 | 0.021332418 | 1.497518537  | 0.017164014 | 1.204899972 | 0.29298455  | 0.02844107   | 1.325747012 | 0.022513072  | 1.049420352 |             |         |
| chrUn      | 79609513  | 79613566    | XM 624193       | 4054     | 4004         |                   | 1629           |           | 0.158841159 | 0.007246377 | 1.171250847  | 0.012493573 | 2.019398012 | 0.266421117 | 0.014925373  | 0.862268567 | 0.027363184  | 1.580825706 | XM 624193.2 |         |
| chr6       | 3699950   | 3736993     | XM 393389       | 37044    | 37044        |                   | 33549          |           | 0.386945254 | 0.056204951 | 1.501563286  | 0.035850228 | 0.957769473 | 0.398819637 | 0.0603662    | 1.518140539 | 0.038322531  | 0.963767596 | XM 393389.2 |         |
| chrUn      | 43543345  | 43547857    | XM 395276       | 4513     | 4513         |                   | 3167           |           | 0.244405052 | 0.01462766  | 0.99696642   | 0.019946809 | 1.350912845 | 0.320176823 | 0.020615287  | 0.81397443  | 0.027592769  | 0.984734568 | XM 395276.3 |         |
| chrUn      | 1927946   | 1930738     | AmelGUn WGA458  | 2.503474 | 503474.m     | 2893              | 2893           |           | 0.273764529 | 0.02937206  | 1.587361709  | 0.027046888 | 1.107461658 | 0.301863354 | 0.031561462  | 1.386054234 | 0.024916944  | 1.094253343 |             |         |
| chrUn      | 100022980 | 100025958   | XM 624289       | 2979     | 2979         |                   | 2356           |           | 0.26183283  | 0.00981283  | 0.561435681  | 0.025520484 | 1.523896847 | 0.313667233 | 0.011925043  | 0.499100941 | 0.032367973  | 1.354702554 | XM 624289.2 |         |
| chr2       | 1945601   | 1947262     | XM 394309       | 1662     | 1662         |                   | 1241           |           | 0.231046931 | 0.009030704 | 0.684099633  | 0.018061409 | 1.368199267 | 0.263157895 | 0.021141649  | 0.617246968 | 0.021416449  | 1.234493935 | XM 394309.3 |         |
| chr13      | 1628250   | 1633004     | XM 623397       | 4755     | 4755         |                   | 4051           |           | 0.29190326  | 0.020824569 | 0.983112469  | 0.026714346 | 1.26116448  | 0.331523081 | 0.02426944   | 0.889565133 | 0.031203566  | 1.1437266   |             |         |
| chr7       | 446583    | 448979      | XM 392432       | 2397     | 2397         |                   | 2238           |           | 0.28660826  | 0.010434057 | 0.515983083  | 0.030884808 | 1.527309924 | 0.303395889 | 0.011190689  | 0.494409172 | 0.032676813  | 1.443674783 | XM 392432.3 |         |
| chr3       | 8761756   | 8764085     | XM 393137       | 2330     | 2330         |                   | 2115           |           | 0.288841202 | 0.017174753 | 0.605709571  | 0.024903392 | 1.08436557  | 0.311583924 | 0.018948366  | 0.783439349 | 0.02747513   | 1.153987056 | XM 393137.3 |         |
| chrUn      | 103645148 | 103661168   | XM 392586       | 16021    | 16021        |                   | 13847          |           | 0.29105549  | 0.034019975 | 1.607440591  | 0.022908864 | 1.082441623 | 0.232569011 | 0.039238399  | 1.48465622  | 0.036424383  | 0.999814613 | XM 392586.3 |         |
| chrUn      | 44791397  | 44845740    | XM 396694       | 54344    | 54294        |                   | 48160          |           | 0.307860905 | 0.034351286 | 1.4517051    | 0.025731231 | 1.087416635 | 0.337105482 | 0.038680011  | 1.363577586 | 0.028984     | 1.021766314 | XM 396694.2 |         |
| chr9       | 1289531   | 1292227     | XM 625067       | 2697     | 2697         |                   | 2034           |           | 0.241008528 | 0.010385757 | 0.716185952  | 0.018175074 | 1.253325416 | 0.299901672 | 0.01384083   | 0.615975245 | 0.023277138  | 1.055957563 | XM 625067.2 |         |
| chrUn      | 23459553  | 23464806    | AmelGUn WGA614  | 2.502824 | 502824.m     | 5254              | 1683           |           | 0.351752822 | 0.02679878  | 0.70862273   | 0.022605592 | 0.735242808 | 0.363467492 | 0.027915633  | 0.849376487 | 0.023573201  | 0.717251256 |             |         |
| chrUn      | 77588705  | 77590625    | AmelGUn WGA17   | 2.509804 | 509804.m     | 1921              | 1921           |           | 0.209266027 | 0.00625     | 0.592037535  | 0.01875     | 1.776112605 | 0.288782816 | 0.0088       | 0.437907256 | 0.028        | 1.39334627  |             |         |
| chrUn      | 317096878 | 317098112   | AmelGUn WGA7553 | 2.502333 | 502333.m     | 1235              | 1235           |           | 0.263157895 | 0.011345219 | 0.669297259  | 0.019449847 | 1.14736673  | 0.263157895 | 0.011345219  | 0.669297259 | 0.019449847  | 1.14736673  |             |         |
| chrUn      | 293987498 | 293991653   | XM 624978       | 4156     | 4156         |                   | 3187           |           | 0.284408085 | 0.016847142 | 0.834487652  | 0.024308063 | 1.20404647  | 0.343897082 | 0.021089078  | 0.715147933 | 0.030531948  | 1.035363425 | XM 624978.1 |         |
| chrUn      | 27607114  | 27613996    | XM 624293       | 6883     | 6125         |                   | 3676           |           | 0.179591837 | 0.007023888 | 0.877773399  | 0.008493956 | 1.049349412 | 0.248367791 | 0.010949904  | 0.723598645 | 0.013139885  | 0.868318374 | XM 624293.2 |         |
| chr1       | 20272688  | 21051281    | XM 624177       | 28594    | 28594        |                   | 27036          |           | 0.423830174 | 0.072220474 | 1.608561955  | 0.04280768  | 0.953452704 | 0.433459092 | 0.07527041   | 1.602992671 | 0.045080753  | 0.960060079 | XM 624177.2 |         |
| chr1       | 684310835 | 684314526   | XM 624175       | 3712     | 3712         |                   | 1431           |           | 0.317212273 | 0.014672293 | 0.95722393   | 0.02469617  | 1.344596177 | 0.034238386 | 0.029125377  | 0.857126877 | 0.034238386  | 0.857126877 | XM 624175.2 |         |
| chrUn      | 266774104 | 266773566   | AmelGUn WGA6239 | 2.514013 | 514013.m     | 2120              | 1210           |           | 0.022652194 | 0.467146522 | 0.98709587   | 0.038225578 | 0.70909587  | 0.44245283  | 0.022652194  | 0.467146522 | 0.98709587   | 0.857126877 |             |         |
| chrUn      | 319636220 | 319640137   | XM 392611       | 3918     | 3918         |                   | 2858           |           | 0.289178152 | 0.013275466 | 0.635011882  | 0.026400337 | 1.245600231 | 0.352964192 | 0.017562346  | 0.565627267 | 0.032314717  | 1.040754172 | XM 392611.3 |         |
| chrUn      | 11558168  | 11589988    | XM 623540       | 31821    | 3171         |                   | 23277          |           | 0.240691196 | 0.022254399 | 1.5369606219 | 0.018477132 | 1.259769111 | 0.299005068 | 0.029840419  | 1.335092652 | 0.024694028  | 1.143673543 | XM 623540.2 |         |
| chrUn      | 125589079 | 125589862   | AmelGUn WGA2572 | 2.503634 | 503634.m     | 784               | 784            |           | 0.338010204 | 0.025542784 | 0.897965314  | 0.025542784 | 0.897965314 | 0.380177515 | 0.028231798  | 0.782748094 | 0.029717682  | 0.823945362 |             |         |
| chr11      | 9769944   | 9771100     | NM 001011644.1  | 1157     | 1157         |                   | 1092           |           | 0.27139153  | 0.009515571 | 0.15796881   | 0.030276817 | 1.644335711 | 0.284798535 | 0.010091746  | 0.497726804 | 0.03192661   | 1.583428521 |             |         |
| chr15      | 2976638   | 2980481     | XM 392838       | 3844     | 3844         |                   | 3431           |           | 0.319458897 | 0.013270882 | 0.523217223  | 0.031225605 | 1.231099348 | 0.352958321 | 0.01489486   | 0.881205382 | 0.035046729  | 1.132247958 | XM 392838.3 |         |
| chr2       | 1808576   | 1810147     | AmelG2 WGA69    | 2.511077 | 511077.m     | 1572              | 1572           |           | 0.291348061 | 0.024188415 | 1.142469881  | 0.021642266 | 1.022209894 | 0.314465409 | 0.026929292  | 1.080752063 | 0.023862099  | 0.965988688 |             |         |
| chrUn      | 36520845  | 36522284    | XM 396699       | 17919    | 17919        |                   | 10959          |           | 0.330431386 | 0.019443882 | 0.954439821  | 0.023385977 | 1.349449241 | 0.347350949 | 0.012950949  | 0.551320949 | 0.029912384  | 0.999923099 | XM 39122.3  |         |
| chrUn      | 28114966  | 28118127    | XM 625005       | 3162     | 3162         |                   | 2127           |           | 0.225454129 | 0.012337868 | 0.997057996  | 0.015185068 | 1.227148303 | 0.295251528 | 0.017477563  | 0.823695623 | 0.020784128  | 0.979531001 | XM 625005.1 |         |
| chrUn      | 56170136  | 56176071    | AmelGUn WGA1078 | 2.507126 | 507126.m     | 5936              | 5936           |           | 0.2245434   | 0.00589722  | 0.460580177  | 0.01600674  | 1.262360318 | 0.299747475 | 0.008115648  | 0.37010017  | 0.02828256   | 1.040906728 |             |         |
| chr4       | 8916772   | 8920662     | AmelG4 WGA144   | 2.503249 | 503249.m     | 3891              | 3841           |           | 0.390002603 | 0.056785621 | 0.94526416   | 0.032300078 | 0.849528787 | 0.399572078 | 0.058114622  | 1.456106984 | 0.033208356  | 0.832061134 |             |         |
| chr1       | 10958844  | 10964581    | XM 623389       | 5738     | 5738         |                   | 3175           |           | 0.213663297 | 0.009586892 | 0.840033239  | 0.01882517  | 1.649519814 | 0.326614173 | 0.016180203  | 0.606903611 | 0.032994924  | 1.927607364 | XM 623389.2 |         |
| chr15      | 953876    | 957465      | XM 623985       | 3590     | 3590         |                   | 2835           |           | 0.223119777 | 0.005293954 | 0.433251898  | 0.017275007 | 1.41137775  | 0.262081129 | 0.006021962  | 0.357031227 | 0.020899752  | 1.329108375 | XM 623985.2 |         |
| chr2       | 7068087   | 7064015     | AmelG2 WGA77    | 2.509578 | 509578.m     | 3119              | 3119           |           | 0.241744149 | 0.007376523 | 0.514685368  | 0.023091725 | 1.011188977 | 0.311688312 | 0.010355969  | 0.433308365 | 0.03241783   | 1.356443577 |             |         |
| chr1       | 3111913   | 311191591.1 | NM 001011591.1  | 1138     | 1138         |                   | 1196           |           | 0.369068541 | 0.061527898 | 0.942126808  | 0.034212808 | 1.384215598 | 0.070833577 | 0.070833577  | 1.384215598 | 0.070833577  | 1.384215598 |             |         |
| chr8       | 2041921   | 2043516     | XM 394712       | 1596     | 1596         |                   | 1201           |           | 0.288220551 | 0.02131661  | 0.046898668  | 0.022570533 | 1.108258589 | 0.357202331 | 0.02768191   | 0.883149186 | 0.02933233   | 0.936673379 | XM 394716.3 |         |
| chrUn      | 100469778 | 100470458   | AmelGUn WGA1932 | 2.507305 | 507305.m     | 681               | 681            |           | 0.248164464 | 0.005882353 | 0.80288706   | 0.027941176 | 1.31538355  | 0.324894515 | 0.008492569  | 0.38120953  | 0.020437903  | 1.05849529  |             |         |
| chrUn      | 195319323 | 195329435   | XM 395596       | 10113    | 10113        |                   | 7683           |           | 0.263126669 | 0.014833861 | 0.866811267  | 0.021261867 | 1.424249483 | 0.328127034 | 0.019341349  | 0.726105536 | 0.02783586   | 1.045003237 | XM 395596.3 |         |
| chr10      | 4451601   | 4455067     | XM 625150       | 3467     | 3467         |                   | 3022           |           | 0.237957889 | 0.006058857 | 0.903509556  | 0.02423543  | 1.270238238 | 0.262739907 | 0.006967485  | 0.406706461 | 0.02786994   | 1.626825843 |             |         |
| chr11      | 4770519   | 4833662     | XM 393799       | 63144    | 63144        |                   | 59939          |           | 0.440326872 | 0.073483997 | 1.511602121  | 0.043156011 | 0.890329866 | 0.446237008 | 0.076792008  | 1.542570059 | 0.045036166  | 0.904670193 | XM 393799.3 |         |
| chr9       | 2844252   | 2849366     | XM 394791       | 5115     | 5115         |                   | 5019           |           | 0.373802542 | 0.054947204 | 1.574736727  | 0.030895581 | 0.885439156 | 0.380354652 | 0.015050349  | 0.31050484  | 0.072051081  | 1.03479112  | XM 394791.2 |         |
| chrUn      | 139504116 | 139505038   | AmelGUn WGA2932 | 2.504637 | 504637.m     | 923               | 923            |           |             |             |              |             |             |             |              |             |              |             |             |         |

| chromosome | start     | end       | ID              | length | valid length | without Ns | non-repetitive | nr length    | qcContent    | cpaContent  | cpaQ/E       | qpcContent   | qpcQ/E       | nrGcContent  | nrCpGContent | nrCpGQ/E    | nrGpCContent | nrGpCQ/E     | RefSeqID    | version |
|------------|-----------|-----------|-----------------|--------|--------------|------------|----------------|--------------|--------------|-------------|--------------|--------------|--------------|--------------|--------------|-------------|--------------|--------------|-------------|---------|
| chr10      | 3114180   | 3115764   | XM 392725       | 1585   | 1585         | 1049       | 0.007575758    | 0.0154072918 | 0.244164038  | 0.007575758 | 0.0154072918 | 0.025252525  | 0.1713576394 | 0.344137274  | 0.011516315  | 0.396885822 | 0.037428023  | 1.289878922  | XM 392725.3 |         |
| chr8       | 3327530   | 3371592   | AmelG8 WGA261   | 443813 | 443813       | 39502      | 0.041292885    | 0.1655401762 | 0.315910803  | 0.041292885 | 0.1655401762 | 0.024310073  | 0.974537177  | 0.336793074  | 0.04494921   | 1.58699657  | 0.026477875  | 0.943426049  |             |         |
| chr10      | 1146818   | 1189357   | XM 391830       | 42540  | 41071        | 35854      | 0.392564096    | 0.066478352  | 0.066478352  | 0.392564096 | 0.066478352  | 0.036063897  | 0.936403191  | 0.142757293  | 0.07419418   | 1.742185146 | 0.049355851  | 0.948552199  | XM 391830.3 |         |
| chr15      | 2023763   | 2029895   | AmelG15 WGA41   | 6233   | 6233         | 6060       | 0.358472923    | 0.149094088  | 0.02512945   | 0.358472923 | 0.149094088  | 0.02512945   | 0.918559065  | 0.365171617  | 0.048545913  | 1.47311676  | 0.030057893  | 0.912173894  |             |         |
| chr2       | 6926854   | 6932964   | XM 394995       | 6111   | 6111         | 4356       | 0.235313369    | 0.019148936  | 0.392032927  | 0.235313369 | 0.019148936  | 0.01898527   | 1.38013521   | 0.300045914  | 0.0268989619 | 0.205408555 | 0.025605536  | 1.1472738886 | XM 394995.3 |         |
| chrUn      | 118958677 | 118959332 | AmelGUn WGA4400 | 656    | 656          | 502        | 0.326219511    | 0.076453255  | 0.326219511  | 0.076453255 | 0.036641221  | 0.141906509  | 0.400398046  | 0.022        | 0.054111518  | 0.046       | 0.026411518  | 1.17950592   |             |         |
| chrUn      | 14031208  | 14043148  | XM 397418       | 11941  | 11941        | 10215      | 0.300393602    | 0.027051926  | 0.199441158  | 0.300393602 | 0.027051926  | 0.024120603  | 0.069470754  | 0.335389134  | 0.031697743  | 1.127643174 | 0.027772326  | 0.987996961  |             |         |
| chrUn      | 37068297  | 37080074  | AmelGUn WGA773  | 11778  | 11778        | 11282      | 0.329126876    | 0.042981409  | 0.158751705  | 0.329126876 | 0.042981409  | 0.028568992  | 0.105523193  | 0.36199185   | 0.048060624  | 0.03210689  | 0.980127966  | 0.980127966  |             |         |
| chrUn      | 1287642   | 1290384   | AmelGUn WGA457  | 2743   | 2743         | 2456       | 0.296755377    | 0.01896426   | 0.863911961  | 0.296755377 | 0.01896426   | 0.024070022  | 0.1096503642 | 0.325732899  | 0.020799347  | 0.7867282   | 0.026916803  | 0.101818847  |             |         |
| chrUn      | 307237266 | 307239431 | AmelGUn WGA7295 | 2166   | 2166         | 1546       | 0.227608495    | 0.0073903    | 0.854791618  | 0.227608495 | 0.0073903    | 0.015704388  | 0.221007187  | 0.287839586  | 0.010409889  | 0.510376271 | 0.020819779  | 0.102025242  |             |         |
| chrUn      | 263898527 | 263899961 | AmelGUn WGA6162 | 1435   | 1435         | 1435       | 0.333797909    | 0.020920502  | 0.761813027  | 0.333797909 | 0.020920502  | 0.027894003  | 0.1015774703 | 0.333797909  | 0.020920502  | 0.761813027 | 0.027894003  | 0.1015774703 |             |         |
| chrUn      | 1405839   | 1493323   | XM 392294       | 7485   | 7485         | 6669       | 0.321843687    | 0.03330007   | 1.32073157   | 0.321843687 | 0.03330007   | 0.031801176  | 1.237535881  | 0.349527665  | 0.038016529  | 1.256419509 | 0.035612322  | 1.176962149  | XM 392294.3 |         |
| chrUn      | 202204794 | 202206262 | AmelGUn WGA4558 | 1469   | 1469         | 1469       | 0.402995235    | 0.041553134  | 0.102683066  | 0.402995235 | 0.041553134  | 0.026830666  | 0.053135315  | 0.14296589   | 0.402995235  | 0.053135315 | 0.14296589   | 0.14296589   |             |         |
| chrUn      | 43913927  | 43916179  | XM 625062       | 2253   | 2253         | 1540       | 0.22015091     | 0.060660746  | 0.551010539  | 0.22015091  | 0.060660746  | 0.102021078  | 0.293506494  | 0.009791123  | 0.4557085    | 0.018276762 | 0.850655867  | XM 625062.1  |             |         |
| chrUn      | 24619474  | 24625140  | XM 396998       | 5667   | 5667         | 4413       | 0.273866243    | 0.030533004  | 0.1630645199 | 0.273866243 | 0.030533004  | 0.024708789  | 0.319597271  | 0.326535237  | 0.038645147  | 1.451574005 | 0.031370766  | 1.178336545  | XM 396998.3 |         |
| chrUn      | 69825913  | 69826693  | XM 623623       | 781    | 781          | 764        | 0.297055058    | 0.019230769  | 0.89576321   | 0.297055058 | 0.019230769  | 0.023076923  | 0.1047915852 | 0.302356021  | 0.01965924   | 0.885418184 | 0.023591088  | 1.06250182   | XM 623623.1 |         |
| chr8       | 6572105   | 6573289   | AmelG8 WGA268   | 1185   | 1185         | 1163       | 0.351054852    | 0.028716216  | 0.932239711  | 0.351054852 | 0.028716216  | 0.016891892  | 0.548937301  | 0.357695615  | 0.017226529  | 0.915734993 | 0.017226529  | 0.915734993  |             |         |
| chrUn      | 13956133  | 13960132  | XM 395653       | 4000   | 4000         | 3026       | 0.2405         | 0.014003501  | 0.969368744  | 0.2405      | 0.014003501  | 0.018004501  | 0.246331242  | 0.28849967   | 0.01791539   | 0.861631197 | 0.022893165  | 1.100973197  | XM 395653.3 |         |
| chrUn      | 22642035  | 22646552  | XM 624145       | 4518   | 4518         | 4168       | 0.339530766    | 0.04936905   | 1.723543712  | 0.339530766 | 0.04936905   | 0.02789462   | 0.973840842  | 0.361804223  | 0.053378216  | 1.641134308 | 0.030295744  | 0.931454607  | XM 624145.2 |         |
| chrUn      | 127483413 | 127485664 | XM 623372       | 2252   | 2252         | 2252       | 0.198044161    | 0.007996446  | 0.174133464  | 0.198044161 | 0.007996446  | 0.0460151    | 1.498096167  | 0.288998358  | 0.01320132   | 0.632757431 | 0.026024614  | 1.265514862  |             |         |
| chrUn      | 237610263 | 237614555 | XM 396066       | 4293   | 4293         | 2958       | 0.207780107    | 0.030494874  | 0.328095179  | 0.207780107 | 0.030494874  | 0.015377446  | 1.443618752  | 0.26673428   | 0.004760286  | 0.271911318 | 0.022101326  | 1.262445046  | XM 396066.2 |         |
| chr4       | 7777927   | 7778819   | XM 392345       | 893    | 893          | 842        | 0.330347144    | 0.004484305  | 0.167290629  | 0.330347144 | 0.004484305  | 0.040358744  | 1.50561566   | 0.347980998  | 0.004761905  | 0.160441928 | 0.042857143  | 1.443977351  | XM 392345.3 |         |
| chr7       | 6323507   | 6324871   | AmelG7 WGA233   | 1365   | 1365         | 1254       | 0.361172161    | 0.060117302  | 1.84820084   | 0.361172161 | 0.060117302  | 0.037390029  | 1.149490766  | 0.389154705  | 0.0656       | 1.737616009 | 0.0408       | 1.080712396  |             |         |
| chrUn      | 107618403 | 107619469 | AmelGUn WGA2108 | 1067   | 1067         | 1067       | 0.350154564    | 0.015009381  | 0.491034914  | 0.350154564 | 0.015009381  | 0.037523452  | 1.227587285  | 0.350515464  | 0.015009381  | 0.491034914 | 0.037523452  | 1.227587285  |             |         |
| chr12      | 6028247   | 6033762   | XM 623185       | 5516   | 5516         | 4760       | 0.28752194     | 0.032819583  | 1.599020378  | 0.28752194  | 0.032819583  | 0.024478694  | 0.192383508  | 0.320798319  | 0.037918685  | 1.486150209 | 0.028439014  | 1.114512657  | XM 623185.2 |         |
| chrUn      | 5984796   | 5984965   | XM 623445       | 705    | 705          | 705        | 0.16875411     | 0.450174281  | 0.16875411   | 0.450174281 | 0.16875411   | 0.017417251  | 0.912151315  | 0.174657383  | 0.016167383  | 0.912151315 | 0.174657383  | 0.912151315  |             |         |
| chr4       | 53191289  | 5418004   | XM 623201       | 26716  | 26716        | 24604      | 0.354094924    | 0.048961258  | 0.0312771398 | 0.354094924 | 0.048961258  | 0.0312771398 | 1.000030321  | 0.9627126971 | 0.035770799  | 1.54470986  | 0.03767232   | 1.991516711  |             |         |
| chrUn      | 29797823  | 29848545  | AmelGUn WGA683  | 50723  | 50723        | 45995      | 0.30284092     | 0.037340799  | 1.629480322  | 0.30284092  | 0.037340799  | 0.02166842   | 0.963471887  | 0.3225568    | 0.040882558  | 1.572302043 | 0.023632166  | 0.908869322  |             |         |
| chr15      | 7002723   | 7019501   | XM 623400       | 16779  | 16103        | 10503      | 0.221201018    | 0.021552795  | 0.1770655023 | 0.221201018 | 0.021552795  | 0.015900621  | 0.306304571  | 0.294106446  | 0.031507374  | 1.462256782 | 0.032714104  | 0.980052526  | XM 623400.2 |         |
| chrUn      | 182711201 | 182712179 | AmelGUn WGA4052 | 979    | 979          | 979        | 0.407558733    | 0.035787321  | 0.867740229  | 0.407558733 | 0.035787321  | 0.060327198  | 1.462762101  | 0.407558733  | 0.035787321  | 0.867740229 | 0.060327198  | 1.462762101  |             |         |
| chr13      | 2000593   | 2009010   | AmelG13 WGA393  | 8418   | 8418         | 8124       | 0.39177952     | 0.051205893  | 1.336260631  | 0.39177952  | 0.051205893  | 0.035404538  | 0.023931071  | 0.399562788  | 0.052266926  | 1.311397187 | 0.036222195  | 0.908828748  |             |         |
| chr4       | 7858766   | 7860636   | XM 394517       | 1871   | 1871         | 1658       | 0.255478354    | 0.009090099  | 0.562808543  | 0.255478354 | 0.009090099  | 0.017112299  | 1.059404317  | 0.28106152   | 0.010284332  | 0.52838533  | 0.019358742  | 0.994607681  | XM 394517.3 |         |
| chrUn      | 30584176  | 30603373  | XM 392948       | 19198  | 19148        | 13854      | 0.237466054    | 0.017758278  | 1.260155676  | 0.237466054 | 0.017758278  | 0.020839682  | 0.778829749  | 0.298095986  | 0.023923445  | 1.08635852  | 0.028006657  | 0.985086255  | XM 392948.3 |         |
| chrUn      | 14911580  | 14913956  | XM 625043       | 1887   | 1269         | 1269       | 0.220985692    | 0.039504082  | 1.79154397   | 0.220985692 | 0.039504082  | 0.020989487  | 0.92014997   | 0.384679962  | 0.038467996  | 1.406815031 | 0.026916551  | 0.849550748  | XM 625043.2 |         |
| chr3       | 5270740   | 5274093   | XM 623133       | 3354   | 3354         | 2354       | 0.236135957    | 0.019385625  | 1.391920824  | 0.236135957 | 0.019385625  | 0.021771548  | 1.563234157  | 0.304163127  | 0.026427962  | 1.144515657 | 0.03116795   | 0.934146306  | XM 623133.2 |         |
| chr12      | 8795497   | 8797313   | AmelG12 WGA390  | 1817   | 1817         | 1734       | 0.442487617    | 0.074339207  | 1.51875046   | 0.442487617 | 0.074339207  | 0.051211454  | 0.064250317  | 0.451539339  | 0.077098801  | 0.51272764  | 0.03152507   | 1.042101263  |             |         |
| chrUn      | 457104    | 548853    | AmelGUn WGA457  | 91750  | 91407        | 85562      | 0.303317403    | 0.046026432  | 0.167994305  | 0.303317403 | 0.046026432  | 0.026016367  | 0.914568685  | 0.351218999  | 0.048886131  | 1.585259399 | 0.027709165  | 0.898541427  |             |         |
| chr16      | 4493255   | 4497561   | XM 392994       | 4307   | 4307         | 4307       | 0.379038409    | 0.023223409  | 0.797926911  | 0.379038409 | 0.023223409  | 0.0306549    | 1.292635094  | 0.35083451   | 0.036622868  | 0.869413451 | 0.036622868  | 1.15043598   | XM 392994.3 |         |
| chrUn      | 27340058  | 27342021  | AmelGUn WGA656  | 1964   | 1964         | 1712       | 0.278004073    | 0.027508915  | 1.448453316  | 0.278004073 | 0.027508915  | 0.023942944  | 1.257557516  | 0.300817757  | 0.031652989  | 1.4141384   | 0.026377491  | 1.178448716  |             |         |
| chrUn      | 30419613  | 30424877  | AmelGUn WGA736  | 5265   | 5265         | 3133       | 0.199810066    | 0.009878419  | 1.000643675  | 0.199810066 | 0.009878419  | 0.013677812  | 1.392983551  | 0.278965847  | 0.016372392  | 0.866373958 | 0.020224719  | 1.07026654   |             |         |
| chrUn      | 120250960 | 120311879 | AmelGUn WGA2636 | 912    | 912          | 705        | 0.233695562    | 0.013236956  | 0.90043202   | 0.233695562 | 0.013236956  | 0.013236956  | 0.90043202   | 0.013236956  | 0.013236956  | 0.90043202  | 0.013236956  | 0.90043202   |             |         |
| chr16      | 367324    | 368233    | AmelG16 WGA447  | 912    | 912          | 838        | 0.359649123    | 0.055982437  | 1.374934681  | 0.359649123 | 0.055982437  | 0.032930845  | 0.92584393   | 0.386634845  | 0.06154395   | 0.035928144 | 0.966679056  |              |             |         |
| chrUn      | 46635939  | 46640866  | XM 395462       | 4928   | 4878         | 4517       | 0.004511895    | 0.328067282  | 0.004511895  | 0.328067282 | 0.004511895  | 0.102460891  | 1.192971935  | 0.344041988  | 0.004879131  | 0.17520515  | 0.13324749   | XM 395462.3  |             |         |
| chrUn      | 61307404  | 61312188  | XM 395519       | 4785   | 4785         | 3711       | 0.256008359    | 0.009615385  | 0.58995222   | 0.256008359 | 0.009615385  | 0.018812709  | 1.154254343  | 0.300188628  | 0.010549094  | 0.46971453  | 0.023803084  | 1.059868684  | XM 395519.3 |         |
| chr3       | 2503560   | 2511395   | XM 393347       | 7836   | 5876         | 5189       | 0.3032         |              |              |             |              |              |              |              |              |             |              |              |             |         |

| chromosome | start     | end       | ID              | length            | valid length | without Ns | nr length | qcContent   | cpaContent  | cpq/cQ       | qpcContent  | qpcQ/E      | nrGCcontent | nrCpGContent | nrCpGQ/E    | nrGpCContent | nrGpCQ/E    | RefSeqID    | version |
|------------|-----------|-----------|-----------------|-------------------|--------------|------------|-----------|-------------|-------------|--------------|-------------|-------------|-------------|--------------|-------------|--------------|-------------|-------------|---------|
| chr3       | 5405989   | 5408312   | XM 623563       | 2324              | 2274         |            | 1269      | 0.204925242 | 0.01056338  | 0.1012212402 | 0.01584507  | 0.518138602 | 0.29787234  | 0.017488076  | 0.795607426 | 0.027027027  | 1.229575113 | XM 623563.2 |         |
| chr12      | 8782799   | 8784802   | XM 393861       | 2004              | 2004         |            | 1961      | 0.348030339 | 0.040938592 | 1.469127343  | 0.034488328 | 1.23621691  | 0.340642529 | 0.041858091  | 1.450406987 | 0.035222052  | 1.22064416  | XM 393861.3 |         |
| chrUn      | 20602169  | 20603622  | XM 624910       | 1454              | 1454         |            | 1208      | 0.255158184 | 0.088123894 | 0.019270475  | 0.017456339 | 1.84165192  | 0.295529801 | 0.017456339  | 0.79964283  | 0.032375145  | 1.026919043 | XM 624910.2 |         |
| chr1       | 21567666  | 2158163   | XM 394264       | 14618             | 14618        |            | 13456     | 0.41047225  | 0.605142826 | 0.040308197  | 0.040308197 | 0.95725899  | 0.41446195  | 0.02718451   | 1.67326044  | 0.04136597   | 0.96338653  | XM 394264.2 |         |
| chrUn      | 299299749 | 299314937 | XM 625137       | 15189             | 15189        |            | 14250     | 0.320033423 | 0.036805373 | 0.043476814  | 0.02264944  | 0.884601116 | 0.332140351 | 0.038867023  | 1.409368393 | 0.023826258  | 0.863970859 | XM 625137.1 |         |
| chr1       | 6216140   | 6226131   | XM 393246       | 549929            | 53953        |            | 55578     | 0.327397099 | 0.045442291 | 1.695794457  | 0.024936816 | 0.30580557  | 0.343895066 | 0.048393202  | 1.636813289 | 0.057546673  | 0.879761257 | XM 393246.3 |         |
| chrUn      | 5450310   | 5456905   | XM 624490       | 6596              | 6596         |            | 4559      | 0.220436628 | 0.013495072 | 1.11095703   | 0.015163002 | 1.248266326 | 0.282518096 | 0.018971983  | 0.951057789 | 0.020957423  | 1.050587092 | XM 624490.2 |         |
| chr7       | 3564200   | 3565907   | XM 396262       | 1708              | 1708         |            | 1708      | 0.576697892 | 0.103104862 | 1.24515285   | 0.075571178 | 0.912640441 | 0.576697892 | 0.103104862  | 1.24515285  | 0.075571178  | 0.912640441 | XM 396262.2 |         |
| chr6       | 12309866  | 12316747  | XM 623992       | 6882              | 6881         |            | 5987      | 0.304897544 | 0.039825581 | 1.714840749  | 0.023110465 | 0.995108318 | 0.340237181 | 0.045195849  | 1.563381944 | 0.026280549  | 0.909077649 | XM 623992.2 |         |
| chrUn      | 148294725 | 148301791 | AmelGUn WGA3164 | 2.512820.512820.m | 7067         | 7067       | 5585      | 0.221451818 | 0.01217096  | 0.992719346  | 0.017548825 | 1.313627779 | 0.259982095 | 0.015088917  | 0.892959994 | 0.021196336  | 1.052936182 | -           |         |
| chr2       | 12918991  | 13088199  | XM 623405       | 169209            | 168622       |            | 147707    | 0.293425532 | 0.034765796 | 1.615340113  | 0.022109671 | 1.027292382 | 0.321081601 | 0.03940198   | 1.52882373  | 0.024987615  | 0.969536512 | XM 624818.2 |         |
| chrUn      | 48571911  | 48576535  | XM 624818       | 4625              | 4625         |            | 3294      | 0.236324324 | 0.014613356 | 1.035390716  | 0.019247405 | 1.396208693 | 0.299939284 | 0.018631643  | 0.836639778 | 0.025962126  | 1.165809526 | XM 624818.2 |         |
| chrUn      | 10792390  | 10794504  | XM 624600       | 1575              | 1575         |            | 1378      | 0.279365079 | 0.010165184 | 0.938063636  | 0.024142313 | 1.27965836  | 0.313497823 | 0.011653314  | 0.491128635 | 0.027676621  | 1.166430485 | XM 624600.2 |         |
| chrUn      | 47406990  | 47408186  | XM 392809       | 1197              | 1197         |            | 765       | 0.222222222 | 0.011705686 | 0.97009727   | 0.02006689  | 1.663023892 | 0.324183007 | 0.018469657  | 0.721748465 | 0.031662269  | 1.237283083 | XM 392809.3 |         |
| chr14      | 1383077   | 1391038   | XM 625196       | 7962              | 7962         |            | 6056      | 0.238131123 | 0.011053888 | 0.791579321  | 0.022610225 | 1.619139521 | 0.297556143 | 0.01459854   | 0.671035066 | 0.029362973  | 1.34969553  | -           |         |
| chrUn      | 147684871 | 147687975 | XM 623087       | 3105              | 3105         |            | 2311      | 0.247987118 | 0.010631444 | 0.708715717  | 0.026417526 | 1.761051177 | 0.306360883 | 0.013472403  | 0.588904463 | 0.035202086  | 1.53875037  | XM 623087.2 |         |
| chrUn      | 14655313  | 14661483  | XM 396167       | 6171              | 6171         |            | 4337      | 0.226219413 | 0.018476499 | 1.456419721  | 0.020421394 | 1.60972706  | 0.291906848 | 0.025510204  | 1.21068885  | 0.027133581  | 1.287732686 | XM 396167.3 |         |
| chr8       | 5537423   | 5539277   | AmelG8 WGA265   | 2.511124.511124.m | 1855         | 1855       | 1586      | 0.309973046 | 0.017799353 | 0.743156885  | 0.027508091 | 1.148515185 | 0.331021438 | 0.020240354  | 0.738997876 | 0.030993042  | 1.131590194 | XM 623527.2 |         |
| chr8       | 9298483   | 9299879   | XM 623527       | 1397              | 1397         |            | 885       | 0.226914817 | 0.01217765  | 0.947608141  | 0.020057307 | 1.56076635  | 0.322033898 | 0.019340159  | 0.746412548 | 0.03185438   | 1.229385373 | XM 623527.2 |         |
| chr3       | 10095048  | 10100521  | AmelG3 WGA119   | 2.506581.506581.m | 5474         | 5474       | 4892      | 0.320971867 | 0.041841769 | 1.63016439   | 0.029051708 | 1.3186024   | 0.348119379 | 0.046907005  | 1.552301967 | 0.02568619   | 1.077799183 | -           |         |
| chr4       | 4711284   | 4714340   | XM 396568       | 3057              | 3057         |            | 2820      | 0.351979064 | 0.047120419 | 1.525504216  | 0.031740838 | 1.02759659  | 0.374822695 | 0.05078125   | 1.450642687 | 0.034090909  | 0.973858028 | XM 396568.2 |         |
| chrUn      | 56455854  | 56459237  | AmelGUn WGA1081 | 2.509965.509965.m | 3384         | 3384       | 1871      | 0.234338061 | 0.01891812  | 1.378011977  | 0.01891812  | 1.378011977 | 0.351683592 | 0.032258065  | 1.043417909 | 0.032258065  | 1.043417909 | -           |         |
| chr1       | 2357203   | 2359655   | AmelG1 WGA3     | 2.503015.503015.m | 2453         | 2453       | 2228      | 0.340807175 | 0.02324633  | 0.80080616   | 0.03588907  | 1.366137791 | 0.368043088 | 0.025629496  | 0.7569097   | 0.039568345  | 1.168562344 | -           |         |
| chr11      | 4047127   | 4051663   | XM 625026       | 4537              | 4537         |            | 4119      | 0.327970024 | 0.037037037 | 1.382816436  | 0.03659612  | 1.236335335 | 0.356682739 | 0.04088586   | 1.288668519 | 0.040399124  | 1.273327227 | XM 625026.1 |         |
| chr1       | 5472507   | 5474997   | AmelG1 WGA14    | 2.506348.506348.m | 2491         | 2491       | 2242      | 0.315134484 | 0.022891566 | 0.925066903  | 0.027710843 | 1.119817829 | 0.341213202 | 0.025469169  | 0.877551016 | 0.030384272  | 1.024062966 | -           |         |
| chr8       | 5552507   | 5553487   | XM 393557       | 1258              | 1258         |            | 1059      | 0.340254625 | 0.039097026 | 1.51463952   | 0.02712529  | 0.940060951 | 0.348282627 | 0.055677653  | 0.028563698 | 0.028563698  | 0.920861526 | XM 392497.3 |         |
| chr5       | 3608868   | 3617133   | XM 392356       | 62456             | 62456        |            | 59203     | 0.291431175 | 0.016968676 | 0.930980595  | 0.028478281 | 1.36063953  | 0.330694669 | 0.023172906  | 0.851631205 | 0.032895803  | 1.028595894 | XM 392373.3 |         |
| chr5       | 9655158   | 9662428   | XM 392373       | 7271              | 7271         |            | 6190      | 0.291431175 | 0.016968676 | 0.930980595  | 0.028478281 | 1.36063953  | 0.330694669 | 0.023172906  | 0.851631205 | 0.032895803  | 1.028595894 | XM 392373.3 |         |
| chr6       | 13461304  | 13488048  | AmelG6 WGA213   | 2.502431.502431.m | 26745        | 26744      | 22908     | 0.28466198  | 0.033430559 | 1.605749901  | 0.022399222 | 1.106039363 | 0.320106513 | 0.038517092  | 1.503804385 | 0.025999307  | 1.01506796  | -           |         |
| chr13      | 305943    | 316235    | XM 623896       | 10293             | 10293        |            | 8516      | 0.385893326 | 0.016698407 | 1.659354885  | 0.037310032 | 1.053425403 | 0.397310513 | 0.063347955  | 1.608268098 | 0.039069673  | 0.991894817 | XM 623896.2 |         |
| chr10      | 3103051   | 3104398   | XM 624421       | 1348              | 1348         |            | 981       | 0.209198813 | 0.004454343 | 0.412433348  | 0.011878248 | 1.099822261 | 0.290246769 | 0.007100592  | 0.343274741 | 0.017751479  | 0.858186853 | XM 624421.1 |         |
| chr7       | 6719182   | 6797097   | XM 393950       | 77916             | 77246        |            | 70694     | 0.333052844 | 0.043513723 | 1.569422494  | 0.026437079 | 0.953514053 | 0.352038363 | 0.047372674  | 1.529196421 | 0.028704268  | 0.926577724 | XM 393950.2 |         |
| chrUn      | 4947289   | 5034533   | XM 393705       | 84725             | 85308        |            | 76068     | 0.474058705 | 0.082577196 | 1.4697938    | 0.056165178 | 0.919351431 | 0.028522721 | 0.088954185  | 1.530273442 | 0.055117073  | 0.94817565  | XM 393705.3 |         |
| chrUn      | 9767630   | 998934    | XM 623618       | 1928              | 1928         |            | 1261      | 0.210580913 | 0.051789795 | 0.419096842  | 0.027121262 | 1.17970561  | 0.340896947 | 0.054056947  | 1.364845123 | 0.035155868  | 0.966490097 | XM 393737.3 |         |
| chr14      | 6880160   | 6881999   | XM 396662       | 1840              | 1840         |            | 1840      | 0.509782609 | 0.077759652 | 1.197646578  | 0.053833605 | 0.829139938 | 0.509782609 | 0.077759652  | 1.197646578 | 0.053833605  | 0.829139938 | XM 396662.1 |         |
| chr15      | 1446351   | 1448308   | AmelG15 WGA427  | 2.508231.508231.m | 1958         | 1958       | 1726      | 0.300360649 | 0.026571283 | 0.471043032  | 0.028615227 | 1.270134171 | 0.33198146  | 0.030214991  | 1.096887175 | 0.032539221  | 1.081623112 | -           |         |
| chr15      | 3148898   | 3150599   | AmelG15 WGA432  | 2.526768.526768.m | 1702         | 1702       | 1702      | 0.567567568 | 0.011699001 | 1.387587372  | 0.062316285 | 1.27417692  | 0.567567568 | 0.011699001  | 1.387587372 | 0.062316285  | 1.27417692  | -           |         |
| chr5       | 8775910   | 8778963   | AmelG5 WGA166   | 2.507597.507597.m | 3054         | 3054       | 2404      | 0.236411264 | 0.00687848  | 0.50653609   | 0.017032427 | 1.25481846  | 0.301467319 | 0.009400179  | 0.430546536 | 0.023276634  | 1.066115231 | -           |         |
| chrUn      | 236999877 | 237004969 | AmelGUn WGA5466 | 2.514674.514674.m | 5093         | 5093       | 3436      | 0.192613318 | 0.0145326   | 1.566837423  | 0.012372439 | 1.333929157 | 0.205372523 | 0.020509815  | 1.29155631  | 0.018165837  | 1.124949273 | -           |         |
| chrUn      | 96756486  | 96760783  | AmelGUn WGA1854 | 2.511479.511479.m | 4298         | 4298       | 3264      | 0.012799628 | 0.012799628 | 1.568735989  | 0.017221317 | 1.437935695 | 0.26683049  | 0.016626099  | 0.934266914 | 0.022776239  | 1.280291696 | -           |         |
| chr7       | 8306594   | 8309046   | XM 394567       | 2053              | 2053         |            | 1484      | 0.258478762 | 0.040882761 | 0.908812694  | 0.025814694 | 1.322196308 | 0.064948758 | 0.026948758  | 0.964948758 | 0.026948758  | 0.964948758 | XM 393126.3 |         |
| chr5       | 8306594   | 8309046   | XM 394567       | 2053              | 2053         |            | 1484      | 0.258478762 | 0.040882761 | 0.908812694  | 0.025814694 | 1.322196308 | 0.064948758 | 0.026948758  | 0.964948758 | 0.026948758  | 0.964948758 | XM 394567.3 |         |
| chrUn      | 24297769  | 24298714  | AmelGUn WGA621  | 2.510339.510339.m | 946          | 946        | 447       | 0.190274841 | 0.003174603 | 0.365355347  | 0.011640212 | 1.339636271 | 0.400313423 | 0.004514673  | 0.205016417 | 0.025523363  | 1.025082085 | -           |         |
| chr10      | 284417    | 288504    | XM 623635       | 4088              | 4088         |            | 2933      | 0.206702544 | 0.004893565 | 0.474516113  | 0.013457304 | 1.804919309 | 0.258779407 | 0.006844267  | 0.424770435 | 0.016769336  | 1.040687566 | XM 623635.2 |         |
| chrUn      | 20605171  | 20606479  | XM 623951       | 1309              | 1309         |            | 814       | 0.213903743 | 0.006116208 | 0.475170374  | 0.021406728 | 1.096196309 | 0.302211302 | 0.008652658  | 0.382597018 | 0.030902349  | 1.306417922 | XM 623951.2 |         |
| chrUn      | 280838709 | 280841477 | XM 624541       | 2769              | 2769         |            | 1583      | 0.195012611 | 0.005057803 | 0.545105346  | 0.01734104  | 1.855040354 | 0.284902085 | 0.008264463  | 0.415910078 | 0.029879212  | 1.503674899 | XM 624541.1 |         |
| chr11      | 2804579   | 2807929   | AmelG11 WGA353  | 2.515056.515056.m | 3351         | 2065       | 2021      | 0.013559322 | 0.060591372 | 0.418202609  | 0.058652448 | 1.07820126  | 0.420089065 | 0.061942517  | 1.405       |              |             |             |         |

| chromosome | start     | end       | ID                                | length | valid length without Ns | non-repetitive | nr length   | qcContent   | cpaContent   | cpqContent  | qpcContent  | apqc/E      | nrGpContent | nrCpGContent | nrCpGO/E     | nrGpCContent | nrGpCOContent | RefSeqID | version |
|------------|-----------|-----------|-----------------------------------|--------|-------------------------|----------------|-------------|-------------|--------------|-------------|-------------|-------------|-------------|--------------|--------------|--------------|---------------|----------|---------|
| chrUn      | 94910258  | 94916993  | XM 395494                         | 6736   | 6736                    | 5534           | 0.304483373 | 0.024350408 | 0.070106226  | 0.027202314 | 0.190886178 | 0.357246115 | 0.029017048 | 0.92958884   | 0.032821465  | 0.1034167585 | -             | -        |         |
| chr15      | 4071928   | 4703173   | AmelG15 WGA436 2.508733.508733.m  | 1246   | 1246                    | 1246           | 0.586673768 | 0.102008003 | 0.186285408  | 0.065863454 | 0.765948059 | 0.586673768 | 0.102008003 | 0.186285408  | 0.065863454  | 0.765948059  | -             | -        |         |
| chrUn      | 207371800 | 207374175 | XM 624720                         | 2376   | 2376                    | 1827           | 0.247474747 | 0.017684211 | 0.171609507  | 0.020210526 | 0.338982293 | 0.298303229 | 0.023051592 | 1.05409305   | 0.07595829   | 0.179580318  | -             | -        |         |
| chr9       | 5152010   | 5120416   | XM 623269                         | 1207   | 1207                    | 1102           | 0.28086164  | 0.02406434  | 0.122408374  | 0.020720685 | 0.105206874 | 0.3039274   | 0.026411658 | 1.14407766   | 0.02276867   | 0.980113591  | XM 623269.2   | -        |         |
| chr11      | 1494448   | 152121    | XM 393762                         | 2678   | 2678                    | 2513           | 0.516803585 | 0.100112066 | 0.49593735   | 0.06163616  | 0.93469005  | 0.520493434 | 0.105619769 | 0.156128302  | 0.063770426  | 0.942628409  | -             | -        |         |
| chr11      | 3207253   | 3211033   | XM 391917                         | 3781   | 3781                    | 2956           | 0.258397249 | 0.022222222 | 0.34293765   | 0.017989418 | 0.087140022 | 0.311566989 | 0.028221693 | 0.175379639  | 0.032121387  | 0.962961632  | XM 391917.3   | -        |         |
| chr3       | 3775663   | 3777395   | AmelG3 WGA106 2.505576.505576.m   | 1733   | 1733                    | 1340           | 0.219272937 | 0.00286836  | 0.240272777  | 0.015588915 | 0.297472996 | 0.26641791  | 0.003753754 | 0.211558074  | 0.01951952   | 0.100101985  | -             | -        |         |
| chrUn      | 54288327  | 54290300  | AmelGUn WGA1045 2.509463.509463.m | 1974   | 1974                    | 1111           | 0.215298886 | 0.013684744 | 0.182372809  | 0.017232641 | 0.488913908 | 0.310531053 | 0.024456522 | 0.014900429  | 0.02807971   | 1.165256048  | -             | -        |         |
| chrUn      | 94041886  | 94044884  | AmelGUn WGA1798 2.503296.503296.m | 2999   | 2999                    | 1788           | 0.229743248 | 0.020680544 | 0.156797673  | 0.019012675 | 0.144152969 | 0.331096197 | 0.033783784 | 0.233058931  | 0.030968468  | 0.113034042  | -             | -        |         |
| chrUn      | 163366324 | 163367224 | XM 623741                         | 901    | 901                     | 713            | 0.222222222 | 0.022222222 | 0.12643424   | 0.021111111 | 0.095011252 | 0.380080415 | 0.028208745 | 0.000170968  | 0.026798307  | 0.95016242   | XM 623741.1   | -        |         |
| chrUn      | 81853899  | 81866329  | XM 397302                         | 12431  | 12431                   | 9861           | 0.262891159 | 0.021882542 | 0.127469481  | 0.01995173  | 0.16222174  | 0.31426833  | 0.027486511 | 0.12068285   | 0.024288851  | 0.987860946  | -             | -        |         |
| chrUn      | 45692261  | 45697829  | XM 395451                         | 5569   | 5569                    | 4817           | 0.223144105 | 0.00914312  | 0.741309849  | 0.011795544 | 0.953112662 | 0.305016722 | 0.014141414 | 0.610303818  | 0.018181818  | 0.784676338  | -             | -        |         |
| chrUn      | 58919926  | 58936385  | AmelGUn WGA1121 2.506960.506960.m | 16460  | 16460                   | 14732          | 0.2908087   | 0.03481378  | 0.05647118   | 0.026186281 | 0.173385529 | 0.323241922 | 0.038710116 | 0.148373827  | 0.029117627  | 0.1160629    | -             | -        |         |
| chr6       | 14150613  | 14157941  | AmelG6 WGA213 2.503767.503767.m   | 7329   | 7329                    | 5562           | 0.275480966 | 0.03316048  | 0.1747978443 | 0.019650655 | 0.103589077 | 0.33045667  | 0.043556841 | 0.159849343  | 0.025302729  | 0.928585403  | -             | -        |         |
| chrUn      | 12373873  | 12382455  | XM 395740                         | 8583   | 8583                    | 7515           | 0.278107888 | 0.030995106 | 0.1603954019 | 0.017828012 | 0.922575056 | 0.304191617 | 0.035237587 | 0.1525027159 | 0.019620929  | 0.84916285   | XM 395740.2   | -        |         |
| chrUn      | 251217780 | 251219439 | AmelGUn WGA5833 2.510670.510670.m | 1660   | 1660                    | 1512           | 0.354216867 | 0.04822182  | 0.1543770528 | 0.025919228 | 0.829776659 | 0.372354497 | 0.052387268 | 0.151309933  | 0.027851459  | 0.904432555  | -             | -        |         |
| chr2       | 11505017  | 11681224  | XM 392251                         | 176208 | 174533                  | 164207         | 0.344051336 | 0.045906411 | 0.053713253  | 0.02735362  | 0.024609487 | 0.355916617 | 0.048543985 | 0.153356461  | 0.02896783   | 0.85129636   | XM 392251.3   | -        |         |
| chr6       | 7589226   | 7590895   | XM 623571                         | 1670   | 1670                    | 830            | 0.198203593 | 0.007789055 | 0.79922766   | 0.011384062 | 0.168101964 | 0.336144578 | 0.014580802 | 0.522617818  | 0.02308627   | 0.827478212  | XM 623571.1   | -        |         |
| chrUn      | 45692261  | 45697829  | XM 395451                         | 5569   | 5569                    | 4817           | 0.223144105 | 0.00914312  | 0.741309849  | 0.011795544 | 0.953112662 | 0.305016722 | 0.014141414 | 0.610303818  | 0.018181818  | 0.784676338  | -             | -        |         |
| chrUn      | 13046247  | 13046996  | XM 396015                         | 2750   | 2750                    | 1858           | 0.212363636 | 0.006911604 | 0.62248722   | 0.015642052 | 0.104878667 | 0.280409042 | 0.010286952 | 0.53107981   | 0.023280996  | 0.912017464  | XM 396015.3   | -        |         |
| chrUn      | 56198597  | 56203291  | XM 397365                         | 4695   | 4695                    | 3338           | 0.219169329 | 0.007030251 | 0.593910991  | 0.012955313 | 0.097835468 | 0.272618334 | 0.009030704 | 0.494067651  | 0.016255682  | 0.889321772  | XM 397365.3   | -        |         |
| chrUn      | 5287380   | 5309161   | XM 623496                         | 21782  | 21782                   | 19389          | 0.285648701 | 0.038703457 | 0.102586072  | 0.020614297 | 0.101285766 | 0.309299087 | 0.043374864 | 0.1815516789 | 0.023212532  | 0.91759361   | XM 623496.2   | -        |         |
| chrUn      | 11232942  | 11233801  | AmelGUn WGA505 2.513000.513000.m  | 2860   | 2860                    | 2460           | 0.474825175 | 0.090940888 | 0.162258985  | 0.053515215 | 0.95483172  | 0.474825175 | 0.090940888 | 0.162258985  | 0.053515215  | 0.95483172   | -             | -        |         |
| chrUn      | 57962865  | 57963449  | AmelGUn WGA1108 2.502952.502952.m | 585    | 535                     | 487            | 0.287850467 | 0.020637899 | 0.103365001  | 0.02637899  | 0.103365001 | 0.331096197 | 0.0248307   | 0.950459251  | 0.0248307    | 0.950459251  | -             | -        |         |
| chr14      | 1224215   | 1228793   | AmelG14 WGA409 2.517076.517076.m  | 4669   | 4669                    | 4529           | 0.389162562 | 0.04991431  | 0.137064698  | 0.040059983 | 0.100047162 | 0.39638514  | 0.051480336 | 0.137605062  | 0.04109589   | 0.1098478163 | -             | -        |         |
| chrUn      | 58919926  | 58936385  | XM 395451                         | 5569   | 5569                    | 4817           | 0.223144105 | 0.00914312  | 0.741309849  | 0.011795544 | 0.953112662 | 0.305016722 | 0.014141414 | 0.610303818  | 0.018181818  | 0.784676338  | -             | -        |         |
| chr9       | 94041886  | 94044884  | XM 625164                         | 1472   | 1472                    | 1143           | 0.28125     | 0.029911625 | 0.33877149   | 0.023133528 | 0.189031888 | 0.338582677 | 0.039608654 | 0.136233305  | 0.029876977  | 0.05595057   | XM 625164.2   | -        |         |
| chr10      | 7696184   | 7709114   | XM 393168                         | 12931  | 12931                   | 12368          | 0.315907509 | 0.027223511 | 0.09293254   | 0.023975251 | 0.90525816  | 0.328023933 | 0.028488164 | 0.106840759  | 0.025089026  | 0.934263168  | XM 393168.3   | -        |         |
| chrUn      | 42368995  | 42376268  | AmelGUn WGA851 2.507680.507680.m  | 7274   | 7274                    | 5489           | 0.237783475 | 0.010724598 | 0.0177451257 | 0.062061721 | 0.156205895 | 0.294406996 | 0.011354567 | 0.039951009  | 0.027091342  | 0.920702018  | -             | -        |         |
| chr4       | 4705633   | 4710025   | AmelG4 WGA137 2.505083.505083.m   | 4393   | 4393                    | 3285           | 0.236053734 | 0.021857923 | 0.156967533  | 0.013661202 | 0.980854708 | 0.291933029 | 0.028125955 | 0.1321128906 | 0.017425864  | 0.818525518  | -             | -        |         |
| chrUn      | 16048171  | 16051607  | XM 624492                         | 3437   | 3437                    | 2296           | 0.214431169 | 0.011350407 | 0.047843165  | 0.014260768 | 0.15620899  | 0.283536585 | 0.015775365 | 0.841646514  | 0.021034181  | 0.122195352  | XM 624492.2   | -        |         |
| chr8       | 8755519   | 8756569   | AmelG8 WGA278 2.500605.500605.m   | 1051   | 1051                    | 1051           | 0.540437678 | 0.078095328 | 0.107113743  | 0.057142567 | 0.783759324 | 0.540437678 | 0.078095328 | 0.107113743  | 0.057142567  | 0.783759324  | -             | -        |         |
| chr2       | 3013237   | 3053651   | XM 624185                         | 40415  | 40415                   | 38422          | 0.473413337 | 0.088355725 | 0.57665397   | 0.051145643 | 0.81286938  | 0.479829264 | 0.091598478 | 0.159446267  | 0.05331735   | 0.926343972  | XM 624185.2   | -        |         |
| chrUn      | 46755051  | 46756196  | AmelGUn WGA1258 2.503122.503122.m | 1146   | 1146                    | 726            | 0.225912592 | 0.0189657   | 0.823486894  | 0.019642857 | 0.813517166 | 0.297043011 | 0.012161162 | 0.55390734   | 0.028367837  | 0.92451378   | -             | -        |         |
| chrUn      | 29702607  | 29703864  | AmelGUn WGA683 2.503330.503330.m  | 1258   | 1258                    | 947            | 0.245627981 | 0.007159905 | 0.48693627   | 0.019093079 | 0.298496378 | 0.303062302 | 0.009574468 | 0.427485271  | 0.025531915  | 0.139690722  | -             | -        |         |
| chrUn      | 59023863  | 59025233  | XM 397478                         | 1371   | 1371                    | 1138           | 0.261123268 | 0.009489051 | 0.584403981  | 0.015328467 | 0.904037199 | 0.305799649 | 0.011473963 | 0.512742817  | 0.026854863  | 0.786276859  | XM 397478.3   | -        |         |
| chrUn      | 16160446  | 16162463  | XM 624796                         | 2018   | 1690                    | 951            | 0.189940828 | 0.002369668 | 0.271916813  | 0.01007109  | 0.155646456 | 0.293375394 | 0.003191489 | 0.155265528  | 0.018085106  | 0.879837993  | XM 624796.2   | -        |         |
| chrUn      | 260751387 | 260757482 | XM 395469                         | 6096   | 6096                    | 4534           | 0.23564304  | 0.010992617 | 0.047839316  | 0.0195242   | 0.19355293  | 0.291574768 | 0.014614703 | 0.703401234  | 0.025686448  | 0.1236280957 | XM 395469.3   | -        |         |
| chr14      | 2051655   | 2056076   | XM 623307                         | 4422   | 4422                    | 4304           | 0.322930801 | 0.033928875 | 0.130843527  | 0.028952726 | 0.116452299 | 0.331784387 | 0.034899953 | 0.1274919061 | 0.029781294  | 0.107830932  | XM 623307.2   | -        |         |
| chrUn      | 54655855  | 54657610  | XM 624902                         | 1046   | 1046                    | 722            | 0.183556405 | 0.006698565 | 0.808397175  | 0.00861244  | 0.242382271 | 0.009762901 | 0.067105011 | 0.103157601  | 0.069944417  | 0.706994417  | XM 624902.2   | -        |         |
| chrUn      | 24230323  | 2424717   | XM 392147                         | 5216   | 5216                    | 4036           | 0.27285276  | 0.031203176 | 0.139144366  | 0.017348332 | 0.280748517 | 0.302794853 | 0.026794592 | 0.787674853  | 0.0207974853 | 0.926343972  | XM 392147.3   | -        |         |
| chrUn      | 19015248  | 19017112  | AmelGUn WGA568 2.501985.501985.m  | 1865   | 1865                    | 1613           | 0.279356568 | 0.02628574  | 0.370044467  | 0.020386266 | 0.062484469 | 0.31184129  | 0.029832192 | 0.149259252  | 0.02295649   | 0.962970673  | -             | -        |         |
| chr5       | 5291564   | 5325402   | XM 392361                         | 33839  | 33839                   | 33357          | 0.439581548 | 0.065163426 | 0.356024881  | 0.040723447 | 0.864738679 | 0.443445154 | 0.065984823 | 0.348915303  | 0.021075008  | 0.846385208  | XM 392361.3   | -        |         |
| chr2       | 4488202   | 4490046   | XM 394332                         | 1845   | 1845                    | 1410           | 0.209756098 | 0.006507592 | 0.600488214  | 0.013557484 | 0.125016903 | 0.253191489 | 0.007829181 | 0.49713177   | 0.017081851  | 0.108465113  | XM 394332.3   | -        |         |
| chr8       | 8111090   | 8113275   | AmelG8 WGA256 2.506279.506279.m   | 2186   | 2186                    | 1928           | 0.232729643 | 0.032494279 | 0.519882014  | 0.025629291 | 0.198731752 | 0.32313278  | 0.036401456 | 0.1401807907 | 0.028601144  | 0.101240498  | -             | -        |         |
| chrUn      | 13645539  | 13913591  | XM 396612                         | 68053  | 67854                   | 56523          | 0.283196204 | 0.032348836 | 0.165864662  | 0.02231327  | 0.112927348 | 0.323602781 | 0.03910327  | 0.1493728044 | 0.026500763  | 0.102317735  | XM 396612.3   | -        |         |
| chr6       | 3643689   | 3653931   | AmelG6 WGA191 2.501757.501757.m   | 10243  | 10243                   | 7851           | 0.236128905 | 0.010251355 | 0.739891566  | 0.018629867 | 0.134461067 | 0.283021271 | 0.013046815 | 0.065262434  | 0.02407521   | 0.177878485  | -             | -        |         |
| chrUn      | 112321407 | 112322633 | XM 623418                         | 1227   | 1227                    | 1198           | 0.349633252 | 0.039151713 |              |             |             |             |             |              |              |              |               |          |         |

| chromosome | start     | end       | ID              | length | valid length | without Ns | non-repetitive | nr length | qcContent     | cpaContent  | cpqD/E      | qpcContent  | qpcQ/E       | nrGContent  | nrCpGContent | nrCpGQ/E    | nrGpCQ/E    | nrGpCQContent | nrGpCQContent | RefSeqID | version |
|------------|-----------|-----------|-----------------|--------|--------------|------------|----------------|-----------|---------------|-------------|-------------|-------------|--------------|-------------|--------------|-------------|-------------|---------------|---------------|----------|---------|
| chr5       | 4113632   | 4117324   | XM 396580       | 3693   | 3693         |            | 2587           |           | 0.233956133   | 0.011375948 | 0.832343582 | 0.022210184 | 1.625051756  | 0.304599923 | 0.015928516  | 0.688670124 | 0.03030303  | 1.31015292    | XM 396580.3   |          |         |
| chr11      | 3133820   | 3134720   | XM 393829       | 901    | 901          |            | 784            |           | 0.257491676   | 0.066666667 | 0.410000055 | 0.02        | 1.230001515  | 0.286989796 | 0.007682458  | 0.381304033 | 0.023047375 | 1.143912098   | XM 393829.2   |          |         |
| chr16      | 789977    | 797850    | AmelG16 WGA448  | 7874   | 7874         |            | 6678           |           | 0.251333503   | 0.009272196 | 0.596584728 | 0.021592785 | 0.38913069   | 0.283917341 | 0.010662252  | 0.538294777 | 0.025229013 | 1.273711586   |               |          |         |
| chr1       | 2058196   | 2058744   | XM 395481       | 549    | 549          |            | 538            |           | 0.234972678   | 0.00729927  | 0.546178575 | 0.009124098 | 0.68273218   | 0.238776952 | 0.00744879   | 0.532550077 | 0.009319987 | 1.669068846   | XM 395481.2   |          |         |
| chr11      | 131228    | 137329    | AmelG11 WGA345  | 6102   | 6052         |            | 5533           |           | 0.438367482   | 0.086446281 | 1.803806016 | 0.046280992 | 0.985707866  | 0.437375746 | 0.086696833  | 1.813263532 | 0.046153846 | 0.965370768   |               |          |         |
| chrUn      | 23020379  | 23025813  | XM 396814       | 5435   | 5435         |            | 4069           |           | 0.233486661   | 0.009937431 | 0.73517959  | 0.013249008 | 0.980234653  | 0.388031457 | 0.012586377  | 0.615381273 | 0.01752211  | 0.856707263   | XM 396814.2   |          |         |
| chrUn      | 25092202  | 25099036  | AmelGUn WGA628  | 6835   | 6785         |            | 4541           |           | 0.205747973   | 0.005012531 | 0.485035407 | 0.016217013 | 1.569232199  | 0.277912354 | 0.007538803  | 0.398913117 | 0.023059867 | 1.220204827   | -             |          |         |
| chrUn      | 29459844  | 29461379  | AmelGUn WGA680  | 1536   | 1536         |            | 1411           |           | 0.270182292   | 0.008469055 | 0.464091803 | 0.021498371 | 1.178079191  | 0.288447909 | 0.009232955  | 0.444011669 | 0.0234375   | 1.127106544   | -             |          |         |
| chr1       | 10090969  | 10096111  | AmelG1 WGA26    | 5143   | 5143         |            | 4983           |           | 0.370211939   | 0.052314275 | 1.530209208 | 0.033644496 | 0.984112242  | 0.375075256 | 0.053836882  | 1.537188627 | 0.034752913 | 0.992289674   | -             |          |         |
| chr7       | 153253    | 122446    | XM 392428       | 69194  | 69194        |            | 65946          |           | 0.465951222   | 0.095882276 | 1.767383367 | 0.05230074  | 0.964051562  | 0.471067237 | 0.099087611  | 1.786739881 | 0.054060920 | 0.974893963   | XM 392428.3   |          |         |
| chr16      | 2231289   | 2234301   | AmelG16 WGA451  | 2743   | 2743         |            | 2366           |           | 0.230041072   | 0.080823341 | 0.60985178  | 0.015317287 | 1.16426249   | 0.256973795 | 0.009325986  | 0.568450098 | 0.017804154 | 1.085222914   | -             |          |         |
| chr3       | 1771777   | 1773573   | AmelG3 WGA401   | 1797   | 1797         |            | 1768           |           | 0.435169722   | 0.068485523 | 1.446576543 | 0.046770601 | 0.987905932  | 0.441176471 | 0.069648924  | 1.431372189 | 0.047565119 | 1.977522471   | -             |          |         |
| chr2       | 4560711   | 4562256   | XM 392223       | 1546   | 1546         |            | 1336           |           | 0.29236104    | 0.017475278 | 0.102710927 | 0.055889968 | 1.225437047  | 0.325598802 | 0.019504786  | 0.743193911 | 0.030007502 | 1.143375247   | XM 392223.3   |          |         |
| chrUn      | 57232148  | 57233152  | AmelGUn WGA1096 | 1005   | 1005         |            | 713            |           | 0.199004975   | 0.003984064 | 0.412972494 | 0.012948207 | 1.342160606  | 0.259467041 | 0.004231312  | 0.259665343 | 0.018335684 | 1.125214686   | -             |          |         |
| chr1       | 151552604 | 151554244 | NM 001011615.1  | 1641   | 1641         |            | 1086           |           | 0.228519196   | 0.012804878 | 0.984525263 | 0.011585366 | 0.890760952  | 0.291896869 | 0.019408503  | 0.911165932 | 0.017560074 | 0.824388224   | -             |          |         |
| chrUn      | 11075639  | 11076960  | XM 623455       | 1322   | 1322         |            | 897            |           | 0.233736762   | 0.007570023 | 0.555555873 | 0.021196064 | 1.555556446  | 0.321070234 | 0.01011236   | 0.394286466 | 0.031460674 | 0.226690004   | XM 623455.2   |          |         |
| chr10      | 6879672   | 6883225   | AmelG10 WGA325  | 3554   | 3554         |            | 3034           |           | 0.275182893   | 0.0306783   | 1.620606138 | 0.018575851 | 0.981284451  | 0.309822017 | 0.035029742  | 1.459729479 | 0.021480502 | 0.896511733   | -             |          |         |
| chrUn      | 71564560  | 71570979  | XM 397138       | 6420   | 6420         |            | 4346           |           | 0.23411215    | 0.023056551 | 1.689166219 | 0.019006707 | 1.392420802  | 0.303267372 | 0.032392411  | 1.414282612 | 0.027070801 | 1.181936183   | XM 397138.3   |          |         |
| chr8       | 644793    | 649888    | AmelG8 WGA250   | 5096   | 5096         |            | 3916           |           | 0.226648352   | 0.012168793 | 0.956065337 | 0.015897939 | 1.249053101  | 0.274259448 | 0.015633009  | 0.840814619 | 0.020246028 | 1.08892385    | -             |          |         |
| chr13      | 2694810   | 2707297   | XM 393452       | 12488  | 12247        |            | 11787          |           | 0.12991102    | 0.070232478 | 1.68981177  | 0.038791343 | 0.910774487  | 0.403278383 | 0.077022565  | 1.646173019 | 0.04008833  | 0.907720879   | XM 393452.3   |          |         |
| chr14      | 7885135   | 7888030   | AmelG14 WGA424  | 2896   | 2896         |            | 2871           |           | 0.575276243   | 0.106044905 | 1.293500306 | 0.067357133 | 0.825320049  | 0.575755756 | 0.05960265   | 1.297370513 | 0.06761938  | 0.827927235   | -             |          |         |
| chrUn      | 4723965   | 4748864   | XM 393444       | 24900  | 24900        |            | 20887          |           | 0.319718876   | 0.041206474 | 1.612462868 | 0.027792281 | 1.087548055  | 0.39888926  | 0.048524118  | 1.498731759 | 0.032589393 | 1.006566632   | XM 393444.3   |          |         |
| chr8       | 7571245   | 7593733   | AmelG8 WGA274   | 22129  | 20011        |            | 18072          |           | 0.3403628     | 0.048580568 | 1.678188531 | 0.029388245 | 1.015200469  | 0.364320496 | 0.053460515  | 1.611499457 | 0.032109583 | 0.967920682   | -             |          |         |
| chr10      | 5843360   | 5847017   | XM 393712       | 3658   | 3658         |            | 3618           |           | 0.554948059   | 0.098988242 | 1.285978737 | 0.009792826 | 0.9050869    | 0.551686014 | 0.098174779  | 1.290827796 | 0.067754425 | 0.90852986    | XM 393712.2   |          |         |
| chr1       | 21267898  | 21281756  | XM 392185       | 13859  | 13859        |            | 13278          |           | 0.394184285   | 0.065088757 | 1.677905305 | 0.035142156 | 0.905920048  | 0.400587438 | 0.067109303  | 1.675754376 | 0.03649525  | 0.911309121   | XM 392185.3   |          |         |
| chr7       | 7781843   | 7782474   | XM 392474       | 9034   | 9034         |            | 9034           |           | 0.297420334   | 0.03128073  | 1.128043123 | 0.023939582 | 1.709425247  | 0.328845179 | 0.00845217   | 1.709425247 | 0.023939582 | 0.9324742     | XM 392474.2   |          |         |
| chr15      | 7314328   | 7315563   | XM 394113       | 1236   | 1236         |            | 1028           |           | 0.230582524   | 0.080906883 | 0.672482401 | 0.017813765 | 1.344649802  | 0.268484242 | 0.01752688   | 0.598224207 | 0.021505376 | 1.394148785   | -             |          |         |
| chr1       | 8928667   | 8923095   | XM 623341       | 3429   | 3429         |            | 2817           |           | 0.265384394   | 0.01487748  | 0.872625583 | 0.021295216 | 1.249052305  | 0.310614129 | 0.018162393  | 0.779379163 | 0.025641026 | 1.100299995   | XM 623341.2   |          |         |
| chr14      | 3192160   | 3207332   | XM 393978       | 15173  | 15173        |            | 14101          |           | 0.404204838   | 0.058725213 | 1.439595671 | 0.034471395 | 0.844067865  | 0.305483029 | 0.014473684  | 0.621525253 | 0.026315789 | 1.130045914   | XM 625177.2   |          |         |
| chrUn      | 84614060  | 84622408  | AmelGUn WGA1613 | 8349   | 8221         |            | 5195           |           | 0.190244946   | 0.009855214 | 1.089534651 | 0.014235308 | 1.573772274  | 0.249470645 | 0.014133591  | 0.908470567 | 0.021103582 | 1.35648345    | -             |          |         |
| chr1       | 22877127  | 22879795  | AmelG1 WGA58    | 2669   | 2669         |            | 1761           |           | 0.25814912    | 0.02098905  | 1.308617523 | 0.019115442 | 1.191776673  | 0.353208404 | 0.032        | 1.075937549 | 0.028571429 | 0.90658526    | -             |          |         |
| chr15      | 4906969   | 4909398   | AmelG15 WGA436  | 2430   | 2430         |            | 2307           |           | 0.472835006   | 0.065047345 | 1.164964347 | 0.04610951  | 0.825797512  | 0.481577807 | 0.068606166  | 1.186410211 | 0.048632219 | 0.840996343   | -             |          |         |
| chrUn      | 11194647  | 11197031  | AmelG3 WGA122   | 2385   | 2385         |            | 1800           |           | 0.265408805   | 0.014681208 | 0.839549761 | 0.018036913 | 1.031446849  | 0.320555586 | 0.018973214  | 1.42699218  | 0.023995536 | 0.93296607    | -             |          |         |
| chrUn      | 51129137  | 51130528  | AmelGUn WGA470  | 6928   | 6928         |            | 6928           |           | 0.259564293   | 0.086367821 | 0.986367821 | 0.025943962 | 1.051544746  | 0.325463745 | 0.015862149  | 0.690879627 | 0.015862149 | 0.690879627   | -             |          |         |
| chrUn      | 35108594  | 35118649  | XM 392720       | 10056  | 10006        |            | 6827           |           | 0.219168499   | 0.016693323 | 1.396548409 | 0.015093962 | 1.262747364  | 0.287827743 | 0.02428971   | 1.181109107 | 0.021198292 | 0.3078613     | XM 392720.3   |          |         |
| chrUn      | 17350832  | 17352391  | XM 625177       | 1560   | 1560         |            | 766            |           | 0.007697242   | 0.007697242 | 0.674626495 | 0.015394884 | 0.65352939   | 0.305483029 | 0.014473684  | 0.621525253 | 0.026315789 | 1.130045914   | XM 625177.2   |          |         |
| chr10      | 3823496   | 3840815   | XM 623677       | 8320   | 8320         |            | 8110           |           | 0.348918269   | 0.048681376 | 1.599645443 | 0.032936651 | 1.082292263  | 0.356720099 | 0.049851925  | 1.567131709 | 0.033810464 | 1.062856654   | -             |          |         |
| chrUn      | 46620863  | 46623091  | XM 624472       | 2229   | 2229         |            | 1866           |           | 0.266927636   | 0.007181329 | 0.359609349 | 0.02064632  | 1.137376878  | 0.308681672 | 0.008055854  | 0.338381433 | 0.023630505 | 0.92585537    | XM 624472.2   |          |         |
| chrUn      | 38963346  | 38969395  | AmelGUn WGA798  | 6050   | 6050         |            | 4771           |           | 0.187123746   | 0.005687521 | 0.653312763 | 0.012211442 | 1.002700932  | 0.252466009 | 0.009122619  | 0.575377688 | 0.017086613 | 1.11690653    | -             |          |         |
| chrUn      | 242864052 | 24286476  | AmelGUn WGA5616 | 625    | 625          |            | 375            |           | 0.256         | 0.009615385 | 0.600385169 | 0.017628205 | 1.1007706143 | 0.314465409 | 0.012658228  | 0.53505094  | 0.021097046 | 0.7841757     | -             |          |         |
| chrUn      | 171213456 | 171213456 | XM 624060       | 606    | 606          |            | 426            |           | 0.61144073267 | 0.005262266 | 1.025262266 | 0.005262266 | 1.025262266  | 0.005262266 | 0.011135857  | 0.624216037 | 0.0221715   | 0.9240076     | -             |          |         |
| chr5       | 11552005  | 11557814  | XM 393097       | 5810   | 5810         |            | 4210           |           | 0.2232358     | 0.00964021  | 0.773794091 | 0.0154932   | 1.243597645  | 0.285035629 | 0.013126492  | 0.646523194 | 0.02124105  | 0.46129078    | XM 393097.3   |          |         |
| chrUn      | 91527163  | 91529789  | XM 395325       | 2627   | 2627         |            | 2339           |           | 0.264179673   | 0.012947449 | 0.54354543  | 0.023990861 | 1.381081281  | 0.289867465 | 0.01457976   | 0.698189981 | 0.0215437   | 0.732704965   | XM 395325.3   |          |         |
| chr15      | 4134050   | 4137491   | XM 394098       | 3442   | 3442         |            | 3409           |           | 0.484601976   | 0.095902354 | 1.646816995 | 0.067131648 | 1.152771896  | 0.489293048 | 0.096859407  | 1.631511539 | 0.067801585 | 1.142058077   | XM 394098.3   |          |         |
| chr5       | 11214640  | 11225350  | XM 624889       | 10711  | 10711        |            | 9822           |           | 0.434226496   | 0.074416433 | 1.579190533 | 0.042763372 | 0.907489666  | 0.460496844 | 0.081020408  | 1.528892449 | 0.046428571 | 0.876128544   | XM 624889.2   |          |         |
| chrUn      | 246894608 | 246900178 | XM 396832       | 5571   | 5571         |            | 5429           |           | 0.447136959   | 0.065709156 | 1.323077565 | 0.052962298 | 1.066414977  | 0.457722022 | 0.067477876  | 1.29692892  | 0.054387906 | 1.054338884   | -             |          |         |
| chr1       | 19392937  | 19394985  | XM 394150       | 2049   | 2049         |            | 1914           |           | 0.280624695   | 0.016601563 | 0.858649526 | 0.0234375   | 1.122111095  | 0.298281099 | 0.017810372  | 0.816090622 | 0.025144904 | 1.152127937   | XM 394150.3   |          |         |
| chr3       | 6640026   | 6641792   | AmelG2 WGA112   | 1767   | 1767         |            | 1257           |           | 0.2116581     |             |             |             |              |             |              |             |             |               |               |          |         |

| chromosome | start     | end       | ID              | lenqth            | valid  | lenqth | without | Ns | non-repetitive | nr | lenqth | qcContent   | cpaContent  | cpqo/E      | qpcContent  | apqcO/E     | nrCpGcontent | nrCpGGO/E    | nrGpCContent | nrGpCO/E    | RefSeqID    | version     |
|------------|-----------|-----------|-----------------|-------------------|--------|--------|---------|----|----------------|----|--------|-------------|-------------|-------------|-------------|-------------|--------------|--------------|--------------|-------------|-------------|-------------|
| chr2       | 2922310   | 2193932   | AmelG2 WGA69    | 2.513916.513916.m | 1623   | 1623   |         |    | 1565           |    |        | 0.610597659 | 0.115289766 | 0.135363549 | 0.075832306 | 0.890359152 | 0.603833866  | 0.113956466  | 0.136398686  | 0.074903969 | 0.896555019 |             |
| chrUn      | 92244870  | 92249487  | XM 393475       |                   | 4618   | 4618   |         |    | 2910           |    |        | 0.220874838 | 0.008663634 | 0.719011257 | 0.016677496 | 0.38409696  | 0.307216494  | 0.013144421  | 0.566273632  | 0.025956679 | 1.102743388 | XM 393475.3 |
| chr2       | 5057063   | 5088453   | XM 392226       |                   | 31391  | 31391  |         |    | 30450          |    |        | 0.413175751 | 0.073462886 | 0.172134139 | 0.040618031 | 0.951739063 | 0.417931034  | 0.074968777  | 0.176886083  | 0.041543417 | 0.951400267 | XM 392226.3 |
| chr11      | 2080694   | 2097045   | XM 391876       |                   | 1052   | 1052   |         |    | 1052           |    |        | 0.435361217 | 0.079923862 | 0.687501125 | 0.030575951 | 0.803572155 | 0.435612127  | 0.079923862  | 0.168750125  | 0.030589891 | 0.803572155 | XM 391876.3 |
| chrUn      | 11266200  | 11267665  | XM 393536       |                   | 1466   | 1466   |         |    | 1101           |    |        | 0.258980859 | 0.008191126 | 0.51049786  | 0.020477816 | 0.276244649 | 0.324250681  | 0.010938924  | 0.442448282  | 0.026435734 | 1.06925016  | XM 393536.2 |
| chr16      | 4511217   | 4515419   | XM 392979       |                   | 4203   | 4203   |         |    | 3858           |    |        | 0.308113254 | 0.027605902 | 0.163189138 | 0.027605902 | 0.163189138 | 0.030474137  | 0.02987013   | 1.092312427  | 0.03012987  | 1.101810796 | -           |
| chrUn      | 37634409  | 37640439  | XM 623172       |                   | 6031   | 6031   |         |    | 4245           |    |        | 0.230973305 | 0.017578773 | 0.132146191 | 0.014925733 | 0.121996013 | 0.28975265   | 0.023899669  | 1.141568312  | 0.020113583 | 0.960725807 | XM 624320.2 |
| chrUn      | 12492036  | 12621699  | AmelGUn WGA514  | 2.509661.509661.m | 129664 | 129564 |         |    | 118664         |    |        | 0.319872804 | 0.040783878 | 0.594406191 | 0.024351464 | 0.951996884 | 0.34012843   | 0.044283652  | 1.53115238   | 0.02642666  | 0.913728003 | XM 624539.1 |
| chrUn      | 295472713 | 295475230 | XM 624320       |                   | 2518   | 2518   |         |    | 1830           |    |        | 0.231930103 | 0.017878427 | 0.133980793 | 0.015494366 | 0.156116687 | 0.286338798  | 0.023051592  | 1.130551899  | 0.017958507 | 0.969044485 | XM 624320.2 |
| chrUn      | 250604975 | 250605725 | XM 624539       |                   | 751    | 751    |         |    | 751            |    |        | 0.483355526 | 0.048       | 0.823208903 | 0.081333333 | 0.394881753 | 0.483355526  | 0.048        | 0.823208903  | 0.081333333 | 0.394881753 | XM 624539.1 |
| chr15      | 3316012   | 3319755   | XM 625224       |                   | 3744   | 3744   |         |    | 3417           |    |        | 0.228899573 | 0.005877638 | 0.451476825 | 0.018701576 | 0.136551712 | 0.265640038  | 0.007083065  | 0.403921167  | 0.022537025 | 1.285203713 | XM 625224.1 |
| chrUn      | 203712747 | 203714411 | AmelGUn WGA4597 | 2.504309.504309.m | 1665   | 1665   |         |    | 34939          |    |        | 0.335735736 | 0.031       | 1.112378419 | 0.039663462 | 0.411864916 | 0.366891892  | 0.0352065    | 1.049173041  | 0.043331077 | 1.291289897 | -           |
| chr8       | 7217318   | 7237202   | XM 394758       |                   | 19885  | 19885  |         |    | 17765          |    |        | 0.344681921 | 0.046117481 | 0.558555995 | 0.086556881 | 0.360430397 | 0.050177795  | 0.158178248  | 0.031269402  | 0.945422845 | 0.934758.3  |             |
| chr6       | 2897085   | 2901672   | AmelG6 WGA189   | 2.505430.505430.m | 4588   | 4588   |         |    | 3989           |    |        | 0.246948561 | 0.018131263 | 0.211960065 | 0.013734467 | 0.908970049 | 0.271477305  | 0.021094927  | 1.15366649   | 0.015570065 | 0.851515743 | -           |
| chrUn      | 10450223  | 10453403  | AmelGUn WGA499  | 2.504650.504650.m | 3181   | 3109   |         |    | 2291           |    |        | 0.270826632 | 0.010299324 | 0.568462762 | 0.029610557 | 0.163433044 | 0.339153208  | 0.0477804297 | 0.039017975  | 1.371760723 | -           |             |
| chrUn      | 45700370  | 45701059  | XM 396033       |                   | 690    | 690    |         |    | 537            |    |        | 0.266666667 | 0.007256894 | 0.40820029  | 0.031930334 | 0.196081277 | 0.331471136  | 0.009363296  | 0.340876691  | 0.041198502 | 0.949857441 | XM 396033.2 |
| chrUn      | 16339578  | 16342718  | XM 396942       |                   | 3141   | 3141   |         |    | 2480           |    |        | 0.23591213  | 0.009235669 | 0.675849349 | 0.015923567 | 0.165257498 | 0.277825891  | 0.011331445  | 0.599106989  | 0.020234723 | 1.069833909 | XM 396942.3 |
| chr9       | 561251    | 565170    | XM 392515       |                   | 3920   | 3920   |         |    | 3236           |    |        | 0.306122449 | 0.020923705 | 0.893474114 | 0.028068385 | 0.198562836 | 0.355959036  | 0.025442135  | 0.803493274  | 0.034129693 | 0.977568631 | XM 392515.3 |
| chrUn      | 114737905 | 114740393 | XM 393038       |                   | 2489   | 2489   |         |    | 1695           |    |        | 0.220727475 | 0.019227034 | 0.578671483 | 0.014235774 | 0.168854744 | 0.283093391  | 0.027325548  | 1.36388223   | 0.019990796 | 0.997787526 | -           |
| chr14      | 5157538   | 5164938   | XM 397024       |                   | 7401   | 7401   |         |    | 7109           |    |        | 0.22057051  | 0.011655949 | 0.174067524 | 0.014067524 | 0.19807414  | 0.292153359  | 0.016023739  | 0.759304014  | 0.01958457  | 0.928038239 | XM 393038.3 |
| chrUn      | 23998319  | 24000191  | AmelGUn WGA618  | 2.506832.506832.m | 1873   | 1873   |         |    | 1873           |    |        | 0.340359411 | 0.048243243 | 0.166990477 | 0.025810811 | 0.893422428 | 0.351948235  | 0.050288773  | 1.62821442   | 0.026905198 | 0.873117519 | XM 397024.1 |
| chrUn      | 10450223  | 10453403  | AmelGUn WGA499  | 2.504650.504650.m | 3181   | 3109   |         |    | 2291           |    |        | 0.270826632 | 0.010299324 | 0.568462762 | 0.029610557 | 0.163433044 | 0.339153208  | 0.0477804297 | 0.039017975  | 1.371760723 | -           |             |
| chrUn      | 45700370  | 45701059  | XM 396033       |                   | 690    | 690    |         |    | 537            |    |        | 0.266666667 | 0.007256894 | 0.40820029  | 0.031930334 | 0.196081277 | 0.331471136  | 0.009363296  | 0.340876691  | 0.041198502 | 0.949857441 | XM 396033.2 |
| chrUn      | 16339578  | 16342718  | XM 396942       |                   | 3141   | 3141   |         |    | 2480           |    |        | 0.23591213  | 0.009235669 | 0.675849349 | 0.015923567 | 0.165257498 | 0.277825891  | 0.011331445  | 0.599106989  | 0.020234723 | 1.069833909 | XM 396942.3 |
| chr9       | 561251    | 565170    | XM 392515       |                   | 3920   | 3920   |         |    | 3236           |    |        | 0.306122449 | 0.020923705 | 0.893474114 | 0.028068385 | 0.198562836 | 0.355959036  | 0.025442135  | 0.803493274  | 0.034129693 | 0.977568631 | XM 392515.3 |
| chrUn      | 114737905 | 114740393 | XM 393038       |                   | 2489   | 2489   |         |    | 1695           |    |        | 0.220727475 | 0.019227034 | 0.578671483 | 0.014235774 | 0.168854744 | 0.283093391  | 0.027325548  | 1.36388223   | 0.019990796 | 0.997787526 | -           |
| chr14      | 5157538   | 5164938   | XM 397024       |                   | 7401   | 7401   |         |    | 7109           |    |        | 0.22057051  | 0.011655949 | 0.174067524 | 0.014067524 | 0.19807414  | 0.292153359  | 0.016023739  | 0.759304014  | 0.01958457  | 0.928038239 | XM 393038.3 |
| chrUn      | 23998319  | 24000191  | AmelGUn WGA618  | 2.506832.506832.m | 1873   | 1873   |         |    | 1873           |    |        | 0.340359411 | 0.048243243 | 0.166990477 | 0.025810811 | 0.893422428 | 0.351948235  | 0.050288773  | 1.62821442   | 0.026905198 | 0.873117519 | XM 397024.1 |
| chrUn      | 10450223  | 10453403  | AmelGUn WGA499  | 2.504650.504650.m | 3181   | 3109   |         |    | 2291           |    |        | 0.270826632 | 0.010299324 | 0.568462762 | 0.029610557 | 0.163433044 | 0.339153208  | 0.0477804297 | 0.039017975  | 1.371760723 | -           |             |
| chrUn      | 45700370  | 45701059  | XM 396033       |                   | 690    | 690    |         |    | 537            |    |        | 0.266666667 | 0.007256894 | 0.40820029  | 0.031930334 | 0.196081277 | 0.331471136  | 0.009363296  | 0.340876691  | 0.041198502 | 0.949857441 | XM 396033.2 |
| chrUn      | 16339578  | 16342718  | XM 396942       |                   | 3141   | 3141   |         |    | 2480           |    |        | 0.23591213  | 0.009235669 | 0.675849349 | 0.015923567 | 0.165257498 | 0.277825891  | 0.011331445  | 0.599106989  | 0.020234723 | 1.069833909 | XM 396942.3 |
| chr9       | 561251    | 565170    | XM 392515       |                   | 3920   | 3920   |         |    | 3236           |    |        | 0.306122449 | 0.020923705 | 0.893474114 | 0.028068385 | 0.198562836 | 0.355959036  | 0.025442135  | 0.803493274  | 0.034129693 | 0.977568631 | XM 392515.3 |
| chrUn      | 114737905 | 114740393 | XM 393038       |                   | 2489   | 2489   |         |    | 1695           |    |        | 0.220727475 | 0.019227034 | 0.578671483 | 0.014235774 | 0.168854744 | 0.283093391  | 0.027325548  | 1.36388223   | 0.019990796 | 0.997787526 | -           |
| chr14      | 5157538   | 5164938   | XM 397024       |                   | 7401   | 7401   |         |    | 7109           |    |        | 0.22057051  | 0.011655949 | 0.174067524 | 0.014067524 | 0.19807414  | 0.292153359  | 0.016023739  | 0.759304014  | 0.01958457  | 0.928038239 | XM 393038.3 |
| chrUn      | 23998319  | 24000191  | AmelGUn WGA618  | 2.506832.506832.m | 1873   | 1873   |         |    | 1873           |    |        | 0.340359411 | 0.048243243 | 0.166990477 | 0.025810811 | 0.893422428 | 0.351948235  | 0.050288773  | 1.62821442   | 0.026905198 | 0.873117519 | XM 397024.1 |
| chrUn      | 10450223  | 10453403  | AmelGUn WGA499  | 2.504650.504650.m | 3181   | 3109   |         |    | 2291           |    |        | 0.270826632 | 0.010299324 | 0.568462762 | 0.029610557 | 0.163433044 | 0.339153208  | 0.0477804297 | 0.039017975  | 1.371760723 | -           |             |
| chrUn      | 45700370  | 45701059  | XM 396033       |                   | 690    | 690    |         |    | 537            |    |        | 0.266666667 | 0.007256894 | 0.40820029  | 0.031930334 | 0.196081277 | 0.331471136  | 0.009363296  | 0.340876691  | 0.041198502 | 0.949857441 | XM 396033.2 |
| chrUn      | 16339578  | 16342718  | XM 396942       |                   | 3141   | 3141   |         |    | 2480           |    |        | 0.23591213  | 0.009235669 | 0.675849349 | 0.015923567 | 0.165257498 | 0.277825891  | 0.011331445  | 0.599106989  | 0.020234723 | 1.069833909 | XM 396942.3 |
| chr9       | 561251    | 565170    | XM 392515       |                   | 3920   | 3920   |         |    | 3236           |    |        | 0.306122449 | 0.020923705 | 0.893474114 | 0.028068385 | 0.198562836 | 0.355959036  | 0.025442135  | 0.803493274  | 0.034129693 | 0.977568631 | XM 392515.3 |
| chrUn      | 114737905 | 114740393 | XM 393038       |                   | 2489   | 2489   |         |    | 1695           |    |        | 0.220727475 | 0.019227034 | 0.578671483 | 0.014235774 | 0.168854744 | 0.283093391  | 0.027325548  | 1.36388223   | 0.019990796 | 0.997787526 | -           |
| chr14      | 5157538   | 5164938   | XM 397024       |                   | 7401   | 7401   |         |    | 7109           |    |        | 0.22057051  | 0.011655949 | 0.174067524 | 0.014067524 | 0.19807414  | 0.292153359  | 0.016023739  | 0.759304014  | 0.01958457  | 0.928038239 | XM 393038.3 |
| chrUn      | 23998319  | 24000191  | AmelGUn WGA618  | 2.506832.506832.m | 1873   | 1873   |         |    | 1873           |    |        | 0.340359411 | 0.048243243 | 0.166990477 | 0.025810811 | 0.893422428 | 0.351948235  | 0.050288773  | 1.62821442   | 0.026905198 | 0.873117519 | XM 397024.1 |
| chrUn      | 10450223  | 10453403  | AmelGUn WGA499  | 2.504650.504650.m | 3181   | 3109   |         |    | 2291           |    |        | 0.270826632 | 0.010299324 | 0.568462762 | 0.029610557 | 0.163433044 | 0.339153208  | 0.0477804297 | 0.039017975  | 1.371760723 | -           |             |
| chrUn      | 45700370  | 45701059  | XM 396033       |                   | 690    | 690    |         |    | 537            |    |        | 0.266666667 | 0.007256894 | 0.40820029  | 0.031930334 | 0.196081277 | 0.331471136  | 0.009363296  | 0.340876691  | 0.041198502 | 0.949857441 | XM 396033.2 |
| chrUn      | 16339578  | 16342718  | XM 396942       |                   | 3141   | 3141   |         |    | 2480           |    |        | 0.23591213  | 0.009235669 | 0.675849349 | 0.015923567 | 0.165257498 | 0.277825891  | 0.011331445  | 0.599106989  | 0.020234723 | 1.069833909 |             |

| chromosome | start     | end       | ID                | length  | valid length without Ns | non-repetitive nr length | qcContent    | cpaContent  | cpaQ/E      | qpcContent  | qpcQ/E      | nrGCcontent | nrCpGcontent | nrCpGQ/E     | nrGpCContent | nrGpCQ/E     | RefSeqID    | version |
|------------|-----------|-----------|-------------------|---------|-------------------------|--------------------------|--------------|-------------|-------------|-------------|-------------|-------------|--------------|--------------|--------------|--------------|-------------|---------|
| chr3       | 168771    | 192938    | XM 394380         | 24168   | 24118                   | 20953                    | 0.3217099926 | 0.04739592  | 0.32139698  | 0.03159728  | 1.221597987 | 0.355796306 | 0.054200153  | 1.7144858356 | 0.036069652  | 1.140954634  | XM 394380.3 |         |
| chrUn      | 20457504  | 20460240  | AmelGUn WGA581    | 2737    | 2737                    | 1857                     | 0.189623676  | 0.004751462 | 0.532573312 | 0.013888889 | 1.556752759 | 0.246095854 | 0.0065000542 | 0.43317462   | 0.019501625  | 1.299523859  | -           |         |
| chr3       | 7793629   | 7796863   | XM 394424         | 3235    | 3235                    | 3095                     | 0.392581144  | 0.05318491  | 1.381022341 | 0.040197897 | 0.043795956 | 0.408077544 | 0.055654522  | 1.337521054  | 0.042057587  | 1.010917075  | XM 394424.2 |         |
| chr4       | 98416     | 98427     | XM 624948         | 462     | 462                     | 3643                     | 0.394281595  | 0.027578707 | 1.487981968 | 0.038211968 | 0.994002782 | 0.45667734  | 0.054835653  | 1.454987894  | 0.044978195  | 1.873251195  | XM 624948.2 |         |
| chr11      | 1350447   | 1358320   | AmelGUn1 WGA350   | 7874    | 7874                    | 7626                     | 0.393470087  | 0.0449638   | 1.8040173   | 0.05437571  | 0.39316618  | 0.404143719 | 0.046450597  | 1.157663414  | 0.036478152  | 1.909125506  | -           |         |
| chrUn      | 20309432  | 20311386  | AmelGUn WGA580    | 1955    | 1955                    | 1070                     | 0.17084399   | 0.002047083 | 0.289263607 | 0.009723644 | 1.374002134 | 0.25046729  | 0.003770028  | 0.246434791  | 0.01022622   | 1.047347864  | -           |         |
| chr1       | 3170309   | 3172297   | XM 625273         | 1839    | 1839                    | 1839                     | 0.370537959  | 0.020120724 | 0.587670876 | 0.02665996  | 0.77866391  | 0.395323545 | 0.021798365  | 0.559377409  | 0.028882834  | 0.741175067  | -           |         |
| chrUn      | 23294070  | 23296675  | XM 624911         | 2606    | 2606                    | 2492                     | 0.298925556  | 0.022264875 | 0.999180746 | 0.024568138 | 1.102544271 | 0.310192616 | 0.023311897  | 0.97110449   | 0.027523473  | 1.071563575  | XM 624911.2 |         |
| chrUn      | 7855169   | 7856087   | XM 623095         | 919     | 919                     | 817                      | 0.274211099  | 0.013071895 | 0.697543001 | 0.017429194 | 0.930057334 | 0.299877601 | 0.014742015  | 0.658202855  | 0.01965602   | 0.877603806  | -           |         |
| chrUn      | 16843367  | 16850819  | XM 395501         | 7453    | 7403                    | 5298                     | 0.21032014   | 0.009458181 | 0.697253739 | 0.01729496  | 1.595496959 | 0.276896942 | 0.013100437  | 0.700831341  | 0.023922537  | 1.07977897   | XM 395501.3 |         |
| chr5       | 9161930   | 9170769   | XM 396763         | 8840    | 8029                    | 5688                     | 0.275376759  | 0.015447863 | 0.814931008 | 0.025787966 | 1.360490921 | 0.351090014 | 0.021570014  | 0.700749174  | 0.035537482  | 1.154512984  | XM 396763.3 |         |
| chr4       | 8285042   | 8289986   | XM 395109         | 4945    | 4945                    | 3921                     | 0.243073812  | 0.00937818  | 0.66345294  | 0.019012945 | 1.299262008 | 0.294057638 | 0.012298232  | 0.574419688  | 0.024084038  | 1.124905223  | XM 395109.3 |         |
| chr1       | 23107260  | 23158098  | XM 392171         | 50839   | 50839                   | 48157                    | 0.36094337   | 0.055234274 | 1.695893104 | 0.03246366  | 0.995918021 | 0.37818967  | 0.057821856  | 1.655303891  | 0.043119261  | 1.974574591  | XM 392171.3 |         |
| chr9       | 5867124   | 5868736   | XM 393194         | 1613    | 1613                    | 1201                     | 0.293242405  | 0.009925558 | 0.46850526  | 0.024193548 | 1.141981571 | 0.372189842 | 0.013389121  | 0.391718024  | 0.032635983  | 0.954812683  | XM 393194.2 |         |
| chr13      | 3605844   | 3611863   | XM 623984         | 6020    | 6020                    | 5887                     | 0.487375415  | 0.084731683 | 1.435673369 | 0.057484632 | 0.974005854 | 0.484457279 | 0.085825969  | 1.468591892  | 0.056254249  | 0.962582013  | -           |         |
| chr1       | 17906318  | 17907454  | XM 623975         | 1137    | 1137                    | 1113                     | 0.13984169   | 0.035211268 | 0.149350526 | 0.019366197 | 0.971727891 | 0.320754717 | 0.0360036    | 1.410415028  | 0.01980198   | 0.77522865   | XM 623975.2 |         |
| chrUn      | 5623588   | 5636362   | XM 623830         | 12775   | 12775                   | 11895                    | 0.292133072  | 0.025285737 | 1.187501716 | 0.017770471 | 0.834560029 | 0.308617066 | 0.02719542   | 1.144614505  | 0.018775785  | 0.790244689  | XM 623830.1 |         |
| chr15      | 6405170   | 6407796   | XM 623128         | 2627    | 2627                    | 1732                     | 0.231823373  | 0.008758568 | 0.670339911 | 0.017897944 | 1.369812775 | 0.309468822 | 0.012188044  | 0.530591328  | 0.026117237  | 1.135941417  | -           |         |
| chr2       | 5927508   | 5929950   | AmelG2 WGA75      | 2443    | 2443                    | 1700                     | 0.220221004  | 0.008599509 | 0.714968428 | 0.016380016 | 1.361844625 | 0.285291418 | 0.01183432   | 0.587104464  | 0.023668639  | 1.174208928  | -           |         |
| chr4       | 2866696   | 2868425   | XM 392446         | 1730    | 1730                    | 1431                     | 0.28554913   | 0.026604974 | 1.30544498  | 0.023713129 | 1.164594005 | 0.331236897 | 0.031623331  | 1.152896131  | 0.028812368  | 1.050416493  | XM 392446.3 |         |
| chr2       | 2416259   | 2419345   | XM 623058         | 3087    | 3087                    | 1596                     | 0.208292841  | 0.014581983 | 1.348393248 | 0.016220203 | 1.49821472  | 0.335839599 | 0.027197976  | 0.965051534  | 0.027197976  | 0.965051534  | XM 623058.2 |         |
| chr1       | 5769296   | 5782292   | XM 393299         | 12997   | 12997                   | 11690                    | 0.301531123  | 0.037011388 | 1.269790161 | 0.020698677 | 0.911462689 | 0.326860565 | 0.041166381  | 1.54407599   | 0.023070326  | 0.962582013  | -           |         |
| chr15      | 3306090   | 3308428   | XM 394094         | 2339    | 2339                    | 2018                     | 0.280034203  | 0.007698888 | 0.396856876 | 0.026096076 | 1.344903858 | 0.315163528 | 0.008941878  | 0.36332838   | 0.03030303   | 1.23127951   | XM 394094.3 |         |
| chrUn      | 102025432 | 102027164 | XM 396171         | 1733    | 1733                    | 1204                     | 0.225043278  | 0.015011547 | 1.18453961  | 0.019630485 | 1.393326872 | 0.295681063 | 0.020033389  | 1.4405166034 | 0.02754591   | 0.946532927  | -           |         |
| chr2       | 6317926   | 6363416   | AmelG2 WGA76      | 45491   | 45491                   | 38903                    | 0.264078695  | 0.022095557 | 1.26735985  | 0.022373775 | 1.039368657 | 0.296866566 | 0.025678045  | 1.165472699  | 0.02645257   | 1.01216072   | -           |         |
| chr14      | 1373476   | 13744409  | 2.519247.519247.m | 2069701 | 2068                    | 211                      | 0.206970128  | 0.000000000 | 0.547849538 | 0.000000000 | 1.414028784 | 0.252087844 | 0.010531972  | 0.252087844  | 0.010531972  | 0.187197177  | -           |         |
| chrUn      | 98811680  | 98812998  | AmelGUn WGA1898   | 1319    | 1319                    | 1319                     | 0.052873739  | 0.009104730 | 0.546489878 | 0.019734817 | 0.357657056 | 0.179734817 | 0.009104730  | 0.546489878  | 0.010531972  | 1.819734717  | -           |         |
| chrUn      | 99246116  | 99251989  | AmelGUn WGA1907   | 5874    | 5824                    | 3600                     | 0.20209478   | 0.018722089 | 1.838866262 | 0.01325696  | 1.299015616 | 0.274166667 | 0.029066518  | 1.553500277  | 0.020681945  | 1.105375197  | -           |         |
| chr14      | 16244     | 20743     | XM 392044         | 4500    | 4500                    | 4306                     | 0.323777777  | 0.040897777 | 1.560805779 | 0.026005779 | 0.99584177  | 0.335810494 | 0.042305904  | 1.50620434   | 0.027196653  | 0.962582013  | XM 392044.3 |         |
| chr2       | 1575485   | 1577208   | AmelG2 WGA69      | 1724    | 1724                    | 1724                     | 0.435614849  | 0.062100987 | 1.315105537 | 0.042948346 | 0.90951224  | 0.435614849 | 0.062100987  | 1.315105537  | 0.042948346  | 0.90951224   | -           |         |
| chr1       | 6760860   | 6788985   | XM 394215         | 2826    | 26295                   | 24891                    | 0.417493829  | 0.063479385 | 1.459055777 | 0.039327552 | 0.903932698 | 0.42814672  | 0.065883678  | 1.440534027  | 0.04110691   | 0.898794735  | XM 394215.3 |         |
| chrUn      | 146214164 | 146215531 | XM 624941         | 1368    | 1368                    | 933                      | 0.240497076  | 0.002926116 | 1.2105831   | 0.01975128  | 1.412435923 | 0.306861672 | 0.004301075  | 0.188749963  | 0.029032258  | 1.274060359  | XM 624941.2 |         |
| chrUn      | 3683125   | 3686678   | XM 393651         | 3554    | 3554                    | 3411                     | 0.33849184   | 0.042217844 | 1.480255057 | 0.03208561  | 1.249393843 | 0.374968622 | 0.044027003  | 1.045918911  | 0.034605522  | 1.140983733  | XM 393651.3 |         |
| chrUn      | 5158658   | 5159275   | XM 624897         | 2488    | 2488                    | 2391                     | 0.299839228  | 0.000494738 | 0.547121016 | 0.000494738 | 1.666956759 | 0.310330406 | 0.02262814   | 0.98486756   | 0.03086756   | 1.396927.3   | -           |         |
| chr2       | 6771956   | 6773763   | XM 624301         | 1808    | 1808                    | 1133                     | 0.207411504  | 0.011068609 | 1.042831933 | 0.011068609 | 1.042831933 | 0.286849073 | 0.01598579   | 0.787322871  | 0.01687389   | 0.83106303   | XM 624301.2 |         |
| chrUn      | 40009563  | 40013179  | XM 392452         | 3617    | 3617                    | 2181                     | 0.228089577  | 0.02074115  | 1.60356347  | 0.017975664 | 0.386975501 | 0.302773835 | 0.03169907   | 1.340967908  | 0.025359256  | 1.077274327  | XM 392452.3 |         |
| chrUn      | 61319207  | 61320112  | XM 624335         | 906     | 906                     | 715                      | 0.21192053   | 0.011049724 | 0.988018633 | 0.014364641 | 1.284424223 | 0.257342657 | 0.014064698  | 0.854453361  | 0.018284107  | 1.11078937   | XM 624335.2 |         |
| chrUn      | 79130227  | 79153329  | AmelGUn WGA1506   | 23103   | 23103                   | 19821                    | 0.2856339    | 0.034629036 | 1.698021342 | 0.022811878 | 1.157811559 | 0.31945991  | 0.024020238  | 1.568919487  | 0.026258538  | 1.029417464  | -           |         |
| chr6       | 8128516   | 8173773   | XM 394637         | 45258   | 45258                   | 43347                    | 0.375005524  | 0.059018494 | 1.679408899 | 0.035221071 | 1.002235645 | 0.385678363 | 0.061271623  | 1.648394518  | 0.036513545  | 0.92326858   | XM 394637.2 |         |
| chr2       | 531161    | 532271    | AmelG2 WGA65      | 1111    | 1111                    | 1090                     | 0.227722722  | 0.003603604 | 0.748487578 | 0.015313514 | 0.404328419 | 0.232110092 | 0.0308676471 | 0.273479508  | 0.017386765  | 1.025548156  | -           |         |
| chrUn      | 37148699  | 37149699  | 2.503002.503002.m | 221     | 221                     | 219                      | 0.438991445  | 0.000000000 | 0.451612448 | 0.000000000 | 1.440408942 | 0.073507342 | 0.035607342  | 0.073507342  | 0.035607342  | 0.073507342  | -           |         |
| chrUn      | 91473372  | 91474427  | XM 396579         | 1056    | 1056                    | 868                      | 0.256628788  | 0.008530806 | 0.525004071 | 0.020853081 | 1.283334484 | 0.275824664 | 0.00931677   | 0.496532662  | 0.022774327  | 1.213746508  | XM 396529.2 |         |
| chrUn      | 202313696 | 202314583 | AmelGUn WGA4561   | 888     | 888                     | 864                      | 0.29954955   | 0.010146561 | 0.470288024 | 0.028184893 | 1.306355621 | 0.30787037  | 0.010440835  | 0.458122716  | 0.02900232   | 1.272563099  | -           |         |
| chr12      | 3299701   | 3300660   | AmelG12 WGA385    | 960     | 960                     | 697                      | 0.251041667  | 0.013555787 | 0.861587102 | 0.022940563 | 1.980870548 | 0.30989957  | 0.017316017  | 0.721217169  | 0.03030303   | 1.262130045  | -           |         |
| chr9       | 478235    | 491015    | XM 394766         | 12781   | 11824                   | 11407                    | 0.402380329  | 0.050583658 | 1.336179042 | 0.037726273 | 0.956574827 | 0.400203389 | 0.052474552  | 1.29960108   | 0.039136539  | 0.98864228   | XM 394766.3 |         |
| chrUn      | 256404266 | 256409839 | XM 395689         | 5574    | 5574                    | 3909                     | 0.20039469   | 0.00628028  | 0.63157062  | 0.015790418 | 1.587498988 | 0.258378102 | 0.00870436   | 0.527341972  | 0.02159383   | 1.302844873  | XM 395689.3 |         |
| chrUn      | 47773714  | 47780328  | AmelGUn WGA940    | 6615    | 6311                    | 3822                     | 0.183013785  | 0.0082435   | 0.984533306 | 0.012682308 | 1.514666625 | 0.251177394 | 0.013435195  | 0.818525041  | 0.018967334  | 1.027656259  | -           |         |
| chr1       | 1118758   | 11222760  | XM 623466         | 35716   | 34963                   | 27761                    | 0.266596194  | 0.027516375 | 1.548619434 | 0.020336947 | 1.144561768 | 0.308865657 | 0.033830918  | 1.145889896  | 0.025011747  | 1.4048785875 | XM 623466.2 |         |
| chr16      | 43619548  | 4361279   | XM 624374         | 1732    | 1732                    | 1732                     | 0.382794457  | 0.03061814  | 0.835811803 | 0.041016753 | 1.119672415 | 0.392794457 | 0.03061814   | 0.835811803  | 0.041016753  | 1.96721473   | -           |         |
| chrUn      | 46832824  | 46846347  | AmelGUn WGA924    | 13524   | 11528                   | 9397                     | 0.230569049  | 0.015444685 | 1.162527655 | 0.020824295 | 1.567435018 | 0.267000106 | 0.015        |              |              |              |             |         |

| chromosome | start     | end       | ID              | length            | valid length | without Ns | non-repetitive | nr length   | qcContent    | cpaContent  | cpqo/E       | qpcContent   | nrGContent  | nrCpGContent | nrCpG/G      | nrGpCContent | nrGpC/G     | RefSeqID | version |
|------------|-----------|-----------|-----------------|-------------------|--------------|------------|----------------|-------------|--------------|-------------|--------------|--------------|-------------|--------------|--------------|--------------|-------------|----------|---------|
| chr11      | 2791219   | 2793408   | XM 395871       | 2190              | 2190         | 1540       | 0.260273973    | 0.015075377 | 0.917271581  | 0.021014162 | 0.278620991  | 0.344155884  | 0.02155454  | 0.750543187  | 0.029392554  | 1.023467982  | XM 395871.2 | -        |         |
| chr9       | 3589479   | 3591368   | XM 392534       | 1890              | 1890         | 1701       | 0.271957672    | 0.011646374 | 0.635883034  | 0.018528322 | 0.11016321   | 0.293944738  | 0.021964054 | 0.760246239  | 0.020624632  | 0.966073562  | XM 392534.3 | -        |         |
| chrUn      | 22309712  | 22323136  | XM 393527       | 13425             | 13329        | 10185      | 0.251481732    | 0.021988743 | 0.1394857116 | 0.01891182  | 0.199627232  | 0.307314678  | 0.028196786 | 0.169786105  | 0.02464754   | 1.047081298  | XM 393527.3 | -        |         |
| chr2       | 3063210   | 3081552   | XM 392307       | 18783             | 18783        | 17863      | 0.489661552    | 0.081418621 | 0.525153887  | 0.054687925 | 0.912380363  | 0.096527221  | 0.049052583 | 0.522908641  | 0.052558593  | 0.913657137  | XM 392307.2 | -        |         |
| chr1       | 6612786   | 6614344   | XM 625233       | 1559              | 1559         | 1063       | 0.218729955    | 0.00449294  | 0.40582743   | 0.020539153 | 0.85521111   | 0.287864531  | 0.004730369 | 0.68892515   | 0.030274361  | 1.593121123  | XM 625233.3 | -        |         |
| chrUn      | 62177399  | 62178855  | XM 392628       | 1457              | 1457         | 1118       | 0.253260124    | 0.006181319 | 0.388984591  | 0.02351648  | 0.466947342  | 0.300809845  | 0.008093525 | 0.349875194  | 0.03057554   | 1.321750734  | XM 392628.3 | -        |         |
| chr14      | 1353014   | 1361828   | AmelG14 WGA409  | 5.18913.518913.m  | 8815         | 8815       | 8339           | 0.400680658 | 0.072384842  | 1.805425472 | 0.035738598  | 0.891393454  | 0.015198984 | 0.074585635  | 1.761339075  | 0.037472976  | 0.88492398  | -        |         |
| chr14      | 2328507   | 2329702   | XM 394004       | 1196              | 1196         | 1041       | 0.275083612    | 0.015899582 | 0.851224489  | 0.022594142 | 1.2096348    | 0.305475504  | 0.018322083 | 0.80071352   | 0.020636644  | 1.137856055  | XM 394004.3 | -        |         |
| chrUn      | 9320732   | 9322369   | XM 396496       | 1638              | 1638         | 999        | 0.236874237    | 0.014050092 | 1.002286939  | 0.021991448 | 0.568796947  | 0.34034034   | 0.023162135 | 0.800853445  | 0.036253776  | 1.25350974   | -           |          |         |
| chr6       | 2467140   | 2503496   | AmelG6 WGA186   | 2.502925.502925.m | 36357        | 36239      | 34895          | 0.392946825 | 0.057344703  | 1.485560221 | 0.038579353  | 0.998498417  | 0.400630463 | 0.059149193  | 1.474363308  | 0.039987378  | 0.996732518 | -        |         |
| chr10      | 2294687   | 2295077   | XM 393684       | 4621              | 4621         | 3783       | 0.281757195    | 0.0203632   | 1.036817536  | 0.017965368 | 0.514587624  | 0.371472791  | 0.024940302 | 0.917714137  | 0.021756434  | 0.80055914   | XM 393684.3 | -        |         |
| chrUn      | 113916471 | 113917268 | XM 624058       | 798               | 798          | 707        | 0.284461153    | 0.011142346 | 0.5621491    | 0.031367629 | 1.56125279   | 0.315417256  | 0.012784091 | 0.518593983  | 0.034090909  | 1.382917288  | -           |          |         |
| chrUn      | 4833496   | 48348750  | XM 393523       | 12255             | 12191        | 8311       | 0.277909934    | 0.012142095 | 0.637918423  | 0.016818443 | 0.883603221  | 0.33443509   | 0.017658401 | 0.511002149  | 0.02394775   | 0.693002514  | XM 393523.3 | -        |         |
| chrUn      | 69659368  | 69680897  | AmelGUn WGA1311 | 2.512808.512808.m | 21530        | 20741      | 16511          | 0.281278627 | 0.03370624   | 1.70804131  | 0.02271193   | 1.150911956  | 0.330628066 | 0.042077101  | 1.541925567  | 0.027787912  | 1.018294775 | -        |         |
| chrUn      | 141654802 | 141655597 | AmelGUn WGA2988 | 2.506140.506140.m | 796          | 796        | 796            | 0.31281407  | 0.017610063  | 0.720802171 | 0.040251572  | 1.64754782   | 0.31281407  | 0.017610063  | 0.720802171  | 0.040251572  | 1.64754782  | -        |         |
| chrUn      | 29477022  | 29496690  | AmelGUn WGA680  | 2.517023.517023.m | 19669        | 19536      | 18289          | 0.31270475  | 0.023498695  | 0.970577831 | 0.02723596   | 1.124939882  | 0.320417191 | 0.025078027  | 0.927809731  | 0.029129935  | 1.077717853 | -        |         |
| chr1       | 21980376  | 21981889  | XM 394260       | 1514              | 1514         | 1383       | 0.254293263    | 0.007270324 | 0.45060046   | 0.02247191  | 1.392765046  | 0.272595806  | 0.007971014 | 0.42958782   | 0.026437681  | 1.137716899  | XM 394260.3 | -        |         |
| chr5       | 13042064  | 13043588  | XM 397309       | 1522              | 1522         | 1522       | 0.47043364     | 0.067718606 | 1.229497035  | 0.052596976 | 0.954949154  | 0.47043364   | 0.067718606 | 1.229497035  | 0.052596976  | 0.954949154  | XM 397309.1 | -        |         |
| chrUn      | 167397293 | 167399684 | AmelGUn WGA3656 | 2.506977.506977.m | 2392         | 2392       | 2200           | 0.352006689 | 0.032622334  | 1.070067606 | 0.035131744  | 1.152380499  | 0.373636364 | 0.035486806  | 1.03397793   | 0.036851683  | 1.073746312 | -        |         |
| chrUn      | 196422797 | 196425324 | XM 392690       | 2528              | 2528         | 2147       | 0.271429747    | 0.006727345 | 1.226472218  | 0.001369213 | 1.157417633  | 0.3113812    | 0.007940215 | 0.335314789  | 0.05221859   | 1.065117567  | XM 392690.3 | -        |         |
| chrUn      | 318395605 | 318404656 | XM 392822       | 9052              | 9052         | 7637       | 0.282368537    | 0.033587449 | 1.68519817   | 0.020550215 | 1.031071309  | 0.323032604  | 0.039295571 | 1.506317972  | 0.024444736  | 0.937040612  | XM 392822.3 | -        |         |
| chr1       | 8881425   | 8884446   | XM 624116       | 3022              | 3022         | 2331       | 0.234612839    | 0.010592519 | 0.770105327  | 0.01489573  | 0.282282827  | 0.013781223  | 0.692439651 | 0.019379845  | 0.0193734259 | 0.93421162   | XM 624116.2 | -        |         |
| chrUn      | 280562693 | 280563578 | AmelGUn WGA6598 | 2.506501.506501.m | 886          | 886        | 886            | 0.32395711  | 0.01209094   | 0.694054092 | 0.042937853  | 1.55141503   | 0.32395711  | 0.01209094   | 0.694054092  | 0.042937853  | 1.55141503  | -        |         |
| chrUn      | 203971879 | 203978742 | AmelGUn WGA4604 | 2.502807.502807.m | 6864         | 6864       | 4379           | 0.210081585 | 0.014133761  | 0.282395188 | 0.014862305  | 1.348502238  | 0.284539849 | 0.020929163  | 1.038080208  | 0.021159154  | 1.094487682 | -        |         |
| chr15      | 2216210   | 2219820   | XM 625193       | 3611              | 3611         | 3410       | 0.286901135    | 0.013019391 | 0.642490626  | 0.029362881 | 1.449021411  | 0.3          | 0.013803231 | 0.622475645  | 0.030837004  | 1.390637079  | XM 625193.2 | -        |         |
| chr4       | 5674075   | 5674075   | XM 392781       | 1726              | 1726         | 1382       | 0.242178447    | 0.014673972 | 0.431448303  | 0.028366771 | 0.910484565  | 0.498361761  | 0.00517017  | 0.283965887  | 0.007255664  | 1.007525664  | XM 392781.3 | -        |         |
| chr15      | 5458227   | 5460564   | AmelG3 WGA108   | 2.502738.502738.m | 2338         | 2338       | 1959           | 0.312660393 | 0.0436453    | 0.792687653 | 0.01925456   | 1.708981612  | 0.348642769 | 0.049155146  | 0.622133027  | 0.021505076  | 1.709331966 | -        |         |
| chrUn      | 68163183  | 68168368  | XM 396280       | 5186              | 5186         | 3141       | 0.193019696    | 0.005593057 | 0.607171135  | 0.01099325  | 1.193405334  | 0.264565425  | 0.008010253 | 0.461937129  | 0.016661326  | 0.960829229  | XM 396280.3 | -        |         |
| chrUn      | 69291882  | 69293622  | XM 624971       | 1741              | 1741         | 1150       | 0.207352096    | 0.005747126 | 0.536165151  | 0.014942529 | 1.09420392   | 0.273043478  | 0.008741259 | 0.469683285  | 0.021853147  | 1.174208212  | XM 624971.2 | -        |         |
| chr2       | 2258119   | 2259942   | XM 625122       | 1824              | 1824         | 1710       | 0.371710526    | 0.029621503 | 0.904195075  | 0.035655313 | 1.088382961  | 0.383040936  | 0.031634446 | 0.900703843  | 0.0380785    | 1.084180552  | XM 625122.2 | -        |         |
| chr1       | 20300325  | 20303542  | AmelG1 WGA51    | 2.507862.507862.m | 3218         | 3218       | 2301           | 0.207271597 | 0.004041032  | 0.37902122  | 0.012123096  | 1.26680365   | 0.005686789 | 0.321579876  | 0.015748031  | 0.890578733  | -           |          |         |
| chrUn      | 67494592  | 67499091  | XM 392705       | 4500              | 4500         | 3427       | 0.23707865     | 0.01573741  | 1.153897657  | 0.02257194  | 1.631940969  | 0.294851295  | 0.021515735 | 0.992862707  | 0.029865125  | 1.378152713  | -           |          |         |
| chrUn      | 102279173 | 102286860 | AmelGUn WGA1970 | 2.504133.504133.m | 7688         | 7638       | 6449           | 0.253702008 | 0.031037192  | 1.640973887 | 0.018272082  | 0.990123484  | 0.311366103 | 0.036708664  | 1.514942728  | 0.02242962   | 0.917952585 | -        |         |
| chr8       | 5549286   | 55496864  | XM 395993       | 1532              | 1532         | 1053       | 0.243981783    | 0.064182391 | 1.569937878  | 0.03232418  | 1.815978194  | 0.40403359   | 0.056774271 | 1.58653487   | 0.019581372  | 1.054149819  | XM 392913.3 | -        |         |
| chrUn      | 22685515  | 22689205  | XM 624276       | 3691              | 3691         | 2424       | 0.214846925    | 0.005605406 | 0.57254369   | 0.017866179 | 1.574495147  | 0.290429043  | 0.009554395 | 0.460859519  | 0.027015794  | 1.302429074  | XM 624276.2 | -        |         |
| chrUn      | 24319124  | 24320481  | AmelGUn WGA621  | 2.510840.510840.m | 1358         | 1358       | 1150           | 0.214649845 | 0.008843036  | 0.516819465 | 0.016212233  | 1.039023535  | 0.257657658 | 0.010830325  | 0.655759169  | 0.019855996  | 1.202252142 | -        |         |
| chr1       | 12846152  | 12845934  | AmelG1 WGA37    | 2.503014.503014.m | 8783         | 8783       | 8630           | 0.403506774 | 0.062058757  | 1.524973302 | 0.0363243    | 0.92599052   | 0.404519119 | 0.062036178  | 1.51665509   | 0.03366419   | 0.864635145 | -        |         |
| chr12      | 3300909   | 3305331   | XM 397101       | 4423              | 4423         | 2926       | 0.208229708    | 0.008819539 | 0.832582198  | 0.016960651 | 1.601119611  | 0.279220779  | 0.013062908 | 0.683747082  | 0.02337573   | 1.23254741   | XM 397101.3 | -        |         |
| chrUn      | 20242368  | 20246413  | AmelGUn WGA579  | 2.505994.505994.m | 4051         | 4051       | 2949           | 0.207849914 | 0.005185185  | 0.499506934 | 0.015061728  | 1.4530948712 | 0.265513733 | 0.007162347  | 0.924797585  | 0.020804911  | 1.233935843 | -        |         |
| chr7       | 20203988  | 20130626  | XM 395005       | 9039              | 8730         | 7750       | 0.312829324    | 0.01480463  | 1.698169537  | 0.022802796 | 0.9358243138 | 0.389867742  | 0.046442432 | 1.620131574  | 0.025614489  | 0.893554462  | XM 395005.3 | -        |         |
| chr1       | 11077081  | 11080071  | XM 396807       | 15121             | 15121        | 12121      | 0.259311645    | 0.043144163 | 0.724565274  | 0.014146303 | 1.280318868  | 0.347658631  | 0.007878015 | 0.427658631  | 0.036856564  | 1.047081298  | XM 396807.3 | -        |         |
| chr15      | 1591739   | 1592876   | AmelG15 WGA427  | 2.511905.511905.m | 1138         | 1138       | 1138           | 0.477232023 | 0.07155667   | 1.455406184 | 0.014336851  | 1.760045452  | 0.470123023 | 0.07915567   | 1.455406184  | 0.014336851  | 1.760045452 | -        |         |
| chrUn      | 184285615 | 184287125 | AmelGUn WGA4094 | 2.510485.510485.m | 1511         | 1511       | 1511           | 0.465251078 | 0.049006623  | 0.905609462 | 0.080794702  | 1.493031815  | 0.465254798 | 0.049006623  | 0.905609462  | 0.080794702  | 1.493031815 | -        |         |
| chr10      | 3724490   | 3726514   | XM 393699       | 2025              | 2025         | 1745       | 0.27654321     | 0.020256917 | 1.070217742  | 0.022232302 | 1.174692229  | 0.313467049  | 0.023590334 | 0.970849519  | 0.02589183   | 1.065566545  | XM 393699.3 | -        |         |
| chr11      | 5103933   | 5126718   | AmelG11 WGA355  | 2.518564.518564.m | 22786        | 22786      | 21996          | 0.439612042 | 0.069870529  | 1.449359426 | 0.048540707  | 1.006904224  | 0.44921804  | 0.072046241  | 1.431291604  | 0.050154742  | 0.996388723 | -        |         |
| chr6       | 320021    | 321584    | XM 394657       | 1564              | 1564         | 1343       | 0.281969309    | 0.017274472 | 0.883482523  | 0.026871401 | 1.47487506   | 0.318689501  | 0.020164302 | 0.812322939  | 0.031366692  | 1.263613461  | XM 394657.3 | -        |         |
| chr13      | 1386579   | 1387632   | XM 625046       | 1054              | 1054         | 892        | 0.268509049    | 0.02374169  | 1.313437353  | 0.025641026 | 1.32828454   | 0.310538117  | 0.027057497 | 1.122454455  | 0.030439684  | 1.262617261  | XM 625046.2 | -        |         |
| chrUn      | 28205793  | 28220098  | AmelGUn WGA665  | 2.514016.514016.m | 14306        | 14338      | 11436          | 0.270150824 | 0.02083918   | 1.143829525 |              |              |             |              |              |              |             |          |         |

| chromosome | start     | end       | ID              | lenqth | valid  | lenqth | without | Ns | non-repetitive | nr | lenqth | qcContent   | cpaContent   | cpqo/E      | qpcContent  | apqc/E      | nrGCcontent | nrCpGContent | nrCpGGO/E   | nrGpCContent | nrGpCContent | RefSeqID    | version |
|------------|-----------|-----------|-----------------|--------|--------|--------|---------|----|----------------|----|--------|-------------|--------------|-------------|-------------|-------------|-------------|--------------|-------------|--------------|--------------|-------------|---------|
| chr4       | 2460476   | 16215397  | XM 394491       | 154922 | 154872 |        |         |    | 148252         |    |        | 0.493020042 | 0.08983018   | 1.478288963 | 0.053160715 | 0.874838487 | 0.497052316 | 0.092940493  | 1.504744213 | 0.055083601  | 0.891825804  | XM 394491.3 |         |
| chr2       | 17186157  | 17187757  | XM 625074       | 1601   | 1601   |        |         |    | 1350           |    |        | 0.249219238 | 0.005        | 0.330786863 | 0.01625     | 0.075057202 | 0.284444444 | 0.005943536  | 0.30278393  | 0.019316493  | 0.984047773  | XM 625074.1 |         |
| chrUn      | 6431517   | 6433076   | AmelG2 WGA76    | 1560   | 1560   |        |         |    | 1560           |    |        | 0.375641026 | 0.039769083  | 1.15216714  | 0.026940346 | 0.780500321 | 0.375641026 | 0.039769083  | 1.15216714  | 0.026940346  | 0.780500321  |             |         |
| chr10      | 17358170  | 17366694  | XM 393550       | 2525   | 2525   |        |         |    | 1953           |    |        | 0.256237624 | 0.054381109  | 0.654381109 | 0.256237624 | 0.054381109 | 0.256237624 | 0.054381109  | 0.256237624 | 0.054381109  | 0.256237624  | XM 393550.3 |         |
| chr11      | 2117180   | 2118177   | XM 624671       | 998    | 998    |        |         |    | 709            |    |        | 0.225450902 | 0.009027081  | 0.71790235  | 0.020060181 | 0.519338555 | 0.294781382 | 0.012765957  | 0.591556439 | 0.028368794  | 0.314569865  | XM 624671.2 |         |
| chrUn      | 205425706 | 205429510 | XM 395356       | 3805   | 3805   |        |         |    | 2964           |    |        | 0.234691196 | 0.012881178  | 0.935510473 | 0.019453207 | 1.142811735 | 0.28340081  | 0.016276704  | 0.08198475  | 0.02754154   | 1.233089348  | XM 395356.3 |         |
| chr3       | 112262    | 114504    | AmelG3 WGA97    | 2243   | 2243   |        |         |    | 2048           |    |        | 0.276415515 | 0.037020517  | 1.938187198 | 0.018733274 | 0.980769426 | 0.293945313 | 0.037236649  | 1.724013429 | 0.020578148  | 0.952744264  | -           |         |
| chr1       | 17827424  | 17842837  | XM 394161       | 15414  | 15414  |        |         |    | 14622          |    |        | 0.459192941 | 0.073055213  | 1.38613031  | 0.047297736 | 0.897414739 | 0.45807687  | 0.075395467  | 1.437373832 | 0.04759296   | 0.907311347  | XM 394161.2 |         |
| chrUn      | 26530144  | 26535020  | XM 395638       | 4877   | 4877   |        |         |    | 3767           |    |        | 0.277834734 | 0.013535685  | 1.701604391 | 0.024200164 | 1.254383609 | 0.340589328 | 0.017595308  | 0.606835592 | 0.030925087  | 1.066559526  | XM 395638.3 |         |
| chr16      | 102699    | 144159    | XM 392096       | 41461  | 41361  |        |         |    | 39599          |    |        | 0.406445686 | 0.072053774  | 1.746432336 | 0.036341216 | 0.880834832 | 0.41459592  | 0.074771559  | 1.741400377 | 0.07816083   | 0.806721788  | XM 392096.3 |         |
| chrUn      | 55751813  | 55752666  | XM 625230       | 854    | 854    |        |         |    | 603            |    |        | 0.24941452  | 0.005861665  | 0.387369143 | 0.017584994 | 1.162107429 | 0.333333333 | 0.008347245  | 0.311040537 | 0.025041736  | 0.93312161   | -           |         |
| chr14      | 518760    | 528497    | XM 394042       | 9738   | 9738   |        |         |    | 9172           |    |        | 0.485212569 | 0.0921283    | 1.568991298 | 0.048167686 | 0.820353309 | 0.480997253 | 0.094801223  | 1.591576791 | 0.05024028   | 1.843462355  | XM 394042.2 |         |
| chr12      | 4295573   | 4303175   | XM 392633       | 7603   | 7603   |        |         |    | 7240           |    |        | 0.360252532 | 0.045119705  | 0.347232712 | 0.031307551 | 0.967565556 | 0.047343656 | 0.07327357   | 1.355553713 | 0.03277555   | 0.936362329  | -           |         |
| chrUn      | 19129450  | 19130977  | AmelGUn WGA569  | 1528   | 1528   |        |         |    | 1416           |    |        | 0.270942408 | 0.003274394  | 0.183070002 | 0.022265881 | 1.244876012 | 0.288841808 | 0.00353857   | 0.17377858  | 0.024062279  | 1.181694341  | -           |         |
| chrUn      | 51834721  | 51838490  | AmelGUn WGA1003 | 3770   | 3770   |        |         |    | 2448           |    |        | 0.007429037 | 0.007429026  | 0.670221321 | 0.018307243 | 1.651616828 | 0.285130719 | 0.011508426  | 0.582881925 | 0.025482943  | 1.29066712   | -           |         |
| chr3       | 10850449  | 10871372  | XM 394452       | 20924  | 20924  |        |         |    | 19672          |    |        | 0.334591856 | 0.045070019  | 1.610460095 | 0.028485399 | 1.017851767 | 0.349888166 | 0.047968225  | 1.567496928 | 0.03196558   | 0.98675762   | XM 394452.2 |         |
| chr1       | 23573145  | 23592073  | XM 395815       | 18929  | 18381  |        |         |    | 16598          |    |        | 0.394102606 | 0.065781599  | 0.61941209  | 0.037923717 | 0.979727235 | 0.420050609 | 0.072191706  | 1.640599681 | 0.042071588  | 0.956101988  | XM 395815.3 |         |
| chrUn      | 63705262  | 63706041  | AmelGUn WGA1198 | 780    | 780    |        |         |    | 625            |    |        | 0.244871795 | 0.005134788  | 0.347575115 | 0.014120668 | 0.955831567 | 0.296       | 0.006430868  | 0.297425749 | 0.017684887  | 0.81792081   | -           |         |
| chr4       | 1409395   | 1416448   | XM 396589       | 7054   | 7054   |        |         |    | 5988           |    |        | 0.268925432 | 0.018006522  | 1.017942697 | 0.020983978 | 1.18626393  | 0.301603206 | 0.020760087  | 0.933757666 | 0.023941068  | 1.076833437  | XM 396589.2 |         |
| chr12      | 5404853   | 5408135   | XM 624448       | 3283   | 3283   |        |         |    | 2347           |    |        | 0.236977937 | 0.00351615   | 0.247234583 | 0.013406459 | 0.970938331 | 0.030852833 | 0.004714959  | 0.202538556 | 0.018859837  | 0.810154225  | XM 624448.2 |         |
| chrUn      | 72514209  | 72518204  | XM 624614       | 3996   | 3996   |        |         |    | 3080           |    |        | 0.235735736 | 0.018523154  | 1.356033461 | 0.016250651 | 1.209435249 | 0.286363636 | 0.023801761  | 1.187603011 | 0.020541246  | 1.024917667  | XM 624614.1 |         |
| chr5       | 527112    | 783159    | XM 392354       | 256048 | 250938 |        |         |    | 282127         |    |        | 0.330623501 | 0.043737472  | 1.600596658 | 0.028227108 | 1.035649635 | 0.35043638  | 0.047743296  | 1.555261235 | 0.030537436  | 0.99477193   | XM 392354.3 |         |
| chrUn      | 62861814  | 62866700  | XM 395796       | 4887   | 4887   |        |         |    | 3824           |    |        | 0.23797831  | 0.016373312  | 1.167457878 | 0.017191977 | 1.225830772 | 0.284780335 | 0.020740352  | 1.032553236 | 0.021265424  | 1.058693824  | XM 395796.3 |         |
| chr5       | 11527004  | 11544641  | XM 624306       | 17638  | 17588  |        |         |    | 15857          |    |        | 0.047594678 | 0.017298991  | 0.172899891 | 0.029170931 | 1.049841868 | 0.362363625 | 0.052528445  | 1.601012041 | 0.032237674  | 0.982570567  | XM 624306.2 |         |
| chr6       | 11428818  | 11431345  | AmelG6 WGA204   | 2528   | 2528   |        |         |    | 2364           |    |        | 0.26028481  | 0.009497428  | 0.561267322 | 0.015037594 | 0.88867326  | 0.27538071  | 0.010169492  | 0.536770271 | 0.016101695  | 0.849886262  | -           |         |
| chrUn      | 87572049  | 87578503  | AmelGUn WGA1670 | 6455   | 6455   |        |         |    | 4334           |    |        | 0.282051282 | 0.013170127  | 1.22458273  | 0.015804152 | 0.460999277 | 0.272268005 | 0.019253047  | 0.039572117 | 0.02964509   | 0.23979168   | XM 392325.3 |         |
| chr2       | 10384152  | 10391801  | XM 623196       | 7650   | 7650   |        |         |    | 5808           |    |        | 0.253202614 | 0.015949797  | 1.001540813 | 0.022878808 | 1.436636412 | 0.309056474 | 0.021081375  | 0.88803055  | 0.029203387  | 1.23014068   | XM 623196.2 |         |
| chrUn      | 70031097  | 70032993  | XM 623828       | 1897   | 1897   |        |         |    | 1196           |    |        | 0.2113864   | 0.011075949  | 1.035864938 | 0.018987342 | 1.775768465 | 0.298494983 | 0.017661901  | 0.831595307 | 0.028595458  | 1.346392402  | XM 623828.2 |         |
| chr8       | 6502934   | 6505837   | XM 624428       | 2904   | 2904   |        |         |    | 2627           |    |        | 0.340564738 | 0.027557699  | 0.954775634 | 0.033758181 | 1.169600152 | 0.369623144 | 0.030534351  | 0.898790771 | 0.037022091  | 1.089783809  | XM 624428.2 |         |
| chrUn      | 90718801  | 90727596  | AmelGUn WGA1735 | 8796   | 8796   |        |         |    | 7850           |    |        | 0.380051198 | 0.053439454  | 0.946735112 | 0.035702103 | 0.999946436 | 0.407133758 | 0.0398611948 | 1.455509043 | 0.039826398  | 0.972471572  | -           |         |
| chr12      | 822525    | 840780    | XM 396659       | 18256  | 18256  |        |         |    | 17733          |    |        | 0.398060911 | 0.062448644  | 1.576900754 | 0.035551904 | 0.897726833 | 0.406924942 | 0.06428128   | 1.553454776 | 0.036627349  | 0.885155531  | XM 396659.3 |         |
| chrUn      | 21710046  | 21722292  | XM 396557       | 12247  | 12197  |        |         |    | 9260           |    |        | 0.268754612 | 0.026568266  | 1.471895327 | 0.018122181 | 0.903977985 | 0.321058315 | 0.032411924  | 1.258516406 | 0.02298103   | 0.893226013  | XM 396557.2 |         |
| chr11      | 1166841   | 1168075   | XM 395451       | 1795   | 1795   |        |         |    | 1395           |    |        | 0.396338118 | 0.0371327586 | 1.586471395 | 0.047571849 | 0.847513945 | 0.30799476  | 0.047979943  | 1.548133951 | 0.034634631  | 0.946352904  | -           |         |
| chr5       | 12286329  | 12293201  | AmelG5 WGA173   | 6873   | 6773   |        |         |    | 5014           |    |        | 0.252473055 | 0.011078827  | 0.702293716 | 0.026735598 | 1.694868836 | 0.315915437 | 0.014420188  | 0.585853845 | 0.034848788  | 1.145113459  | -           |         |
| chrUn      | 47432929  | 47434554  | XM 624323       | 1626   | 1626   |        |         |    | 1261           |    |        | 0.237392374 | 0.009230769  | 0.93610552  | 0.017846154 | 1.336137339 | 0.39172339  | 0.021195219  | 0.590230754 | 0.02310757   | 1.41112791   | XM 624323.2 |         |
| chr5       | 13141732  | 13143301  | XM 624081       | 1570   | 1570   |        |         |    | 1423           |    |        | 0.296178344 | 0.035691523  | 1.631482006 | 0.024856597 | 1.136210683 | 0.318341532 | 0.03943662   | 1.563909657 | 0.027464789  | 1.089151369  | XM 624081.2 |         |
| chrUn      | 71613334  | 71618959  | AmelGUn WGA1349 | 5626   | 4997   |        |         |    | 2469           |    |        | 0.183109866 | 0.009409409  | 1.123242074 | 0.011811812 | 1.410027285 | 0.281490482 | 0.017981201  | 0.908713879 | 0.022067838  | 1.15213976   | -           |         |
| chrUn      | 51816579  | 51821829  | AmelGUn WGA1003 | 5251   | 4995   |        |         |    | 4515           |    |        | 0.282382833 | 0.012217104  | 1.061150908 | 0.016623273 | 0.831441054 | 0.305647841 | 0.013312625  | 0.572665132 | 0.018415798  | 0.972186766  | -           |         |
| chr1       | 23605878  | 23614087  | AmelG1 WGA61    | 8210   | 7880   |        |         |    | 5171           |    |        | 0.216393055 | 0.006601498  | 0.593582292 | 0.014091659 | 0.276068981 | 0.288145426 | 0.009333074  | 0.457553554 | 0.026610539  | 1.010430766  | -           |         |
| chrUn      | 189515158 | 189515748 | AmelGUn WGA4230 | 1371   | 1371   |        |         |    | 1247           |    |        | 0.303582652 | 0.012674569  | 1.496168089 | 0.032712215 | 0.879880489 | 0.394251394 | 0.057543659  | 1.481061911 | 0.032781849  | 0.869479132  | XM 396795.2 |         |
| chr6       | 445298    | 445325    | XM 396522       | 12295  | 12245  |        |         |    | 10349          |    |        | 0.274969375 | 0.024340439  | 0.289913378 | 0.023276608 | 1.233641989 | 0.31307377  | 0.028168216  | 1.15305798  | 0.027380509  | 1.25231191   | XM 396522.2 |         |
| chrUn      | 69092222  | 69095516  | AmelGUn WGA1299 | 3295   | 3295   |        |         |    | 2544           |    |        | 0.231866464 | 0.007589557  | 0.569458031 | 0.019429265 | 0.848212559 | 0.286494686 | 0.009873618  | 0.488462208 | 0.02488157   | 1.220592765  | -           |         |
| chr4       | 2183044   | 2185374   | AmelG4 WGA131   | 2331   | 2331   |        |         |    | 2224           |    |        | 0.490014544 | 0.058369099  | 1.363133353 | 0.051072961 | 1.192741684 | 0.425809353 | 0.059405941  | 1.31532994  | 0.053555356  | 1.78592624   | -           |         |
| chrUn      | 285328814 | 285330768 | AmelGUn WGA6721 | 1955   | 1955   |        |         |    | 1920           |    |        | 0.214422575 | 0.016888434  | 0.90775894  | 0.036847492 | 1.762383142 | 0.294270833 | 0.017205422  | 0.799824323 | 0.037539103  | 1.74507192   | -           |         |
| chr1       | 9706652   | 9793448   | XM 394206       | 2797   | 2797   |        |         |    | 2570           |    |        | 0.29710404  | 0.023699571  | 1.823839846 | 0.028254649 | 1.298048179 | 0.314785992 | 0.042121685  | 1.72116751  | 0.030811232  | 1.25900216</ |             |         |

| chromosome | start     | end       | ID               | length            | valid length without Ns | non-repetitive | nr length   | qcContent   | cpaContent  | cpqCpO/E    | qpcContent  | qpcCpO/E     | nrGContent  | nrCpGContent | nrCpGGO/E   | nrGpCContent | nrGpCpCpO/E | RefSeqID    | version |   |   |
|------------|-----------|-----------|------------------|-------------------|-------------------------|----------------|-------------|-------------|-------------|-------------|-------------|--------------|-------------|--------------|-------------|--------------|-------------|-------------|---------|---|---|
| chrUn      | 20850963  | 20857820  | XM 396336        | 6858              | 6808                    | 0.111313547    | 0.229435958 | 0.011313547 | 0.028683944 | 0.189549763 | 0.315093479 | 0.1589549763 | 0.315093479 | 0.017201835  | 0.694818813 | 0.030733945  | 1.241409612 | -           | -       |   |   |
| chrUn      | 62172526  | 62175606  | XM 395030        | 3081              | 3081                    | 0.288867251    | 0.288867251 | 1.296211417 | 0.026623377 | 1.280594412 | 0.317512877 | 0.0303259488 | 1.203237926 | 0.0303259488 | 1.203237926 | 0.0303259488 | 1.203237926 | XM 395030.3 | -       |   |   |
| chrUn      | 84756806  | 84759527  | XM 395497        | 3122              | 3122                    | 0.272581678    | 0.013136815 | 0.013136815 | 0.018583787 | 1.008721034 | 0.305314738 | 0.015111447  | 0.653898682 | 0.015111447  | 0.653898682 | 0.015111447  | 0.653898682 | XM 395497.3 | -       |   |   |
| chr10      | 5072147   | 5081920   | XM 395964        | 873               | 873                     | 0.034623079    | 0.016613079 | 0.016613079 | 0.031669103 | 1.385081377 | 0.337482356 | 0.031669103  | 1.385081377 | 0.031669103  | 1.385081377 | 0.031669103  | 1.385081377 | XM 395964.3 | -       |   |   |
| chrUn      | 252075263 | 252076543 | AmelGUn1 WGA5855 | 2.513175.513175.m | 1281                    | 1281           | 0.245120999 | 0.00703125  | 0.047549697 | 0.0171875   | 1.161232592 | 0.309375     | 0.009404389 | 0.04143977   | 0.022988506 | 0.981248716  | -           | -           | -       |   |   |
| chr2       | 10374754  | 10383697  | AmelG2 WGA83     | 2.504570.504570.m | 8948                    | 7498           | 0.348251272 | 0.014674493 | 1.033484985 | 0.020944504 | 1.475064933 | 0.300184843  | 0.019691622 | 0.874534544  | 0.028608583 | 1.20515509   | -           | -           | -       |   |   |
| chr5       | 12175736  | 12177698  | XM 397030        | 1963              | 1963                    | 0.232806928    | 0.008154944 | 0.60540223  | 0.020897044 | 1.551343215 | 0.293042867 | 0.010585745  | 0.4994264   | 0.028228652  | 1.331803733 | XM 397030.3  | -           | -           | -       |   |   |
| chrUn      | 3785030   | 3796017   | XM 623584        | 10988             | 10988                   | 0.273116127    | 0.034586329 | 1.868601592 | 0.016018931 | 0.865457579 | 0.297133016 | 0.03850061   | 1.759338237 | 0.017878911  | 0.817001397 | -            | -           | -           | -       |   |   |
| chr1       | 18755406  | 18757433  | XM 623810        | 2028              | 2028                    | 0.219922105    | 0.011840158 | 0.994912899 | 0.014800197 | 1.243641124 | 0.316134316 | 0.019834711  | 0.809704272 | 0.023966942  | 0.978392662 | XM 623810.2  | -           | -           | -       |   |   |
| chrUn      | 35841724  | 35852220  | AmelGUn1 WGA756  | 2.503502.503502.m | 10497                   | 9988           | 0.348251272 | 0.050626516 | 1.669747067 | 0.029102668 | 0.958954607 | 0.356666276  | 0.046942847 | 1.477160525  | 0.032390564 | 1.019240762  | -           | -           | -       |   |   |
| chrUn      | 3051976   | 3053732   | XM 395172        | 1757              | 1757                    | 0.291405805    | 0.010820046 | 1.036299727 | 0.023917995 | 1.441294133 | 0.305555556 | 0.011494253  | 0.499004297 | 0.025408348  | 1.103062131 | XM 395172.2  | -           | -           | -       |   |   |
| chr2       | 11895460  | 11861853  | XM 623480        | 5394              | 5394                    | 0.242306266    | 0.00981129  | 0.670852841 | 0.022251066 | 1.566583479 | 0.27472575  | 0.011461318  | 0.629102437 | 0.026228786  | 1.43967673  | -            | -           | -           | -       |   |   |
| chrUn      | 237081144 | 237081946 | AmelGUn1 WGA5468 | 2.515008.515008.m | 803                     | 803            | 0.500625665 | 0.064837905 | 0.03649367  | 0.081047382 | 1.29586708  | 0.500625665  | 0.064837905 | 1.03649367   | 0.048047382 | 1.193586708  | -           | -           | -       | - |   |
| chr1       | 7386301   | 7387316   | XM 397512        | 1016              | 1016                    | 0.36023622     | 0.050246305 | 1.550445408 | 0.039408867 | 1.216035614 | 0.367943548 | 0.051515152  | 1.523996094 | 0.04040404   | 1.195291054 | XM 397512.1  | -           | -           | -       | - |   |
| chr9       | 5925338   | 5930552   | XM 395392        | 5215              | 5215                    | 0.235474593    | 0.009781358 | 0.726877293 | 0.018220176 | 1.353987114 | 0.288595618 | 0.011755878  | 0.585104086 | 0.022511256  | 1.12041208  | XM 395392.3  | -           | -           | -       | - |   |
| chrUn      | 65750726  | 65752288  | XM 395373        | 1563              | 1563                    | 0.244401791    | 0.007682458 | 0.524172816 | 0.021766965 | 1.485156312 | 0.296052632 | 0.009909166  | 0.457882742 | 0.027250206  | 1.259177539 | XM 395373.3  | -           | -           | -       | - |   |
| chr9       | 9396652   | 9397277   | XM 395405        | 626               | 626                     | 0.276357827    | 0.0112      | 0.620123441 | 0.0192      | 1.030687562 | 0.300353357 | 0.012411348  | 0.563499099 | 0.021726596  | 0.965998456 | XM 395405.1  | -           | -           | -       | - |   |
| chrUn      | 167039676 | 167041379 | XM 395771.3      | 1704              | 1704                    | 0.314553991    | 0.029359953 | 1.227979623 | 0.023487962 | 0.98238698  | 0.330007128 | 0.034359341  | 1.287369365 | 0.026485326  | 0.992347219 | XM 395771.3  | -           | -           | -       | - |   |
| chrUn      | 53812491  | 53813815  | XM 396212        | 1325              | 1325                    | 0.210566038    | 0.006797583 | 0.624228831 | 0.018882175 | 1.733968976 | 0.283272283 | 0.011070111  | 0.56544308  | 0.028290283  | 1.445021204 | XM 396212.2  | -           | -           | -       | - |   |
| chr9       | 3939515   | 3970844   | AmelGUn1 WGA287  | 2.503113.503113.m | 31330                   | 31280          | 0.395923274 | 0.05668521  | 0.570899129 | 0.028863323 | 0.82841142  | 0.058269996  | 1.54151617  | 0.03707036   | 0.912349345 | -            | -           | -           | -       |   |   |
| chr13      | 6361307   | 6366170   | XM 393014        | 4864              | 4381                    | 0.384615385    | 0.051381594 | 1.402809681 | 0.036947448 | 1.01002297  | 0.405952671 | 0.054985337  | 1.348038089 | 0.035984443  | 0.975082182 | XM 393014.3  | -           | -           | -       | - |   |
| chr2       | 1186475   | 1190493   | XM 392200        | 4019              | 4019                    | 0.246578751    | 0.005475361 | 0.373221272 | 0.021403683 | 1.458955881 | 0.297356828 | 0.006955422  | 0.327189404 | 0.026873222  | 1.264140878 | -            | -           | -           | -       |   |   |
| chr15      | 2959217   | 2960837   | XM 394085        | 1621              | 1621                    | 0.28624306     | 0.010493827 | 0.518815581 | 0.024691358 | 1.220742543 | 0.314465459 | 0.011921459  | 0.489803536 | 0.028050491  | 1.152478908 | XM 394085.3  | -           | -           | -       | - |   |
| chrUn      | 12003759  | 12006352  | XM 394997        | 2594              | 2594                    | 0.227833462    | 0.006556113 | 0.075627559 | 0.01889703  | 1.177515906 | 0.283774538 | 0.007966012  | 0.391961836 | 0.025491127  | 1.254277876 | XM 394997.3  | -           | -           | -       | - |   |
| chrUn      | 15151718  | 15157611  | XM 625169        | 6234              | 6234                    | 0.28932044     | 0.008984438 | 0.429724818 | 0.0248676   | 1.189416906 | 0.352302968 | 0.011101974  | 0.357891112 | 0.031661184  | 1.020652432 | XM 625169.2  | -           | -           | -       | - |   |
| chrUn      | 908617715 | 908617715 | XM 395086        | 1944              | 1944                    | 0.255098453    | 0.007598453 | 0.44177238  | 0.017598453 | 1.305734645 | 0.305734645 | 0.012903172  | 1.73173436  | 0.012903172  | 1.73173436  | XM 395086.3  | -           | -           | -       | - |   |
| chr9       | 3994520   | 3994520   | AmelGUn1 WGA287  | 2.503447.503447.m | 8875                    | 8039           | 0.489358129 | 0.027290655 | 0.504134206 | 0.042926465 | 0.933160587 | 0.073877722  | 0.738777722 | 0.035309593  | 0.921645472 | -            | -           | -           | -       |   |   |
| chrUn      | 34205530  | 34215310  | XM 625054        | 9781              | 9781                    | 0.277272263    | 0.033537832 | 1.748256255 | 0.022801636 | 1.188601052 | 0.316104594 | 0.039725356  | 1.595400407 | 0.027192255  | 1.093147217 | XM 625054.1  | -           | -           | -       | - |   |
| chr1       | 1403507   | 1405233   | XM 623599        | 1817              | 1817                    | 0.246560264    | 0.00660793  | 0.407019363 | 0.015969163 | 0.287280702 | 0.334956188 | 0.008070433  | 0.393599546 | 0.018341893  | 0.894544422 | XM 623599.2  | -           | -           | -       | - |   |
| chr9       | 5607975   | 5609102   | XM 396222        | 1128              | 1128                    | 0.305851004    | 0.035492458 | 1.522282596 | 0.026619343 | 1.141711947 | 0.318223867 | 0.037071362  | 1.468330281 | 0.027803522  | 1.101247711 | XM 396222.1  | -           | -           | -       | - |   |
| chr5       | 5269609   | 5275497   | AmelG5 WGA159    | 2.510768.510768.m | 6429                    | 6429           | 0.363198009 | 0.046981954 | 1.436356535 | 0.02784692  | 0.35135579  | 0.37583563   | 0.049158909 | 1.404076436  | 0.029234036 | 0.834982332  | -           | -           | -       | - |   |
| chr16      | 5494785   | 5499387   | AmelG16 WGA456   | 2.502726.502726.m | 4603                    | 4603           | 0.33152292  | 0.024771838 | 0.919295302 | 0.024771838 | 1.910295302 | 0.340305893  | 0.025669894 | 0.903216958  | 0.025669894 | 0.903216958  | -           | -           | -       | - |   |
| chrUn      | 12216482  | 12220394  | AmelG11 WGA374   | 2.509216.509216.m | 3913                    | 3863           | 0.224954698 | 0.01360601  | 0.824718291 | 0.016835017 | 1.371994627 | 0.013486177  | 0.35645426  | 0.021577883  | 1.177032416 | -            | -           | -           | -       |   |   |
| chr12      | 11917239  | 11917239  | AmelG1 WGA378    | 2.501201.501201.m | 2489                    | 2489           | 0.33849373  | 0.015648211 | 0.91695504  | 0.015648211 | 1.91695504  | 0.33849373   | 0.015648211 | 1.91695504   | 0.015648211 | 1.91695504   | XM 392701.4 | -           | -       | - | - |
| chrUn      | 9748649   | 97488504  | AmelGUn1 WGA1869 | 2.500959.500959.m | 2009                    | 1959           | 0.34762634  | 0.037301993 | 1.236124872 | 0.039856924 | 1.320790959 | 0.34762634   | 0.037301993 | 1.236124872  | 0.039856924 | 1.320790959  | -           | -           | -       | - |   |
| chrUn      | 171557305 | 171563971 | AmelGUn1 WGA3763 | 2.511152.511152.m | 6667                    | 6667           | 0.312884356 | 0.043654365 | 1.738699005 | 0.025652565 | 1.484133023 | 0.333495818  | 0.047324768 | 1.702124655  | 0.0278094   | 1.300217581  | -           | -           | -       | - |   |
| chr5       | 10858139  | 10869665  | XM 394858        | 11527             | 10597                   | 0.420307634    | 0.067956583 | 1.53871097  | 0.038603115 | 0.87407333  | 0.423231358 | 0.068784081  | 1.536010029 | 0.038936191  | 0.86479947  | -            | -           | -           | -       |   |   |
| chr2       | 4175691   | 4182352   | XM 623789        | 6662              | 3513                    | 0.31283803     | 0.033232839 | 1.362006482 | 0.03303902  | 1.350365401 | 0.349671053 | 0.038562953  | 0.037244562 | 0.037244562  | 1.818439251 | -            | -           | -           | -       |   |   |
| chrUn      | 176967399 | 176970025 | XM 623861        | 2627              | 2627                    | 0.188808527    | 0.00418888  | 0.473734661 | 0.014470678 | 1.036578408 | 0.257676099 | 0.006056935  | 0.369941017 | 0.021199273  | 1.294793561 | XM 623861.2  | -           | -           | -       | - |   |
| chrUn      | 10668593  | 10671219  | XM 392918        | 2627              | 2627                    | 0.23144271     | 0.009139375 | 0.688318591 | 0.017136329 | 1.290597358 | 0.297124601 | 0.012292892  | 0.654148467 | 0.022982362  | 1.049732259 | XM 392918.3  | -           | -           | -       | - |   |
| chr4       | 91418     | 926183    | AmelG1 WGA144    | 2.504084.504084.m | 19866                   | 19866          | 0.439214282 | 0.082186928 | 0.748786745 | 0.082186928 | 1.748786745 | 0.439214282  | 0.082186928 | 1.748786745  | 0.082186928 | 1.748786745  | XM 392619.6 | -           | -       | - | - |
| chr1       | 14455798  | 14461729  | XM 624012        | 5932              | 5932                    | 0.34962931     | 0.05125611  | 1.677347884 | 0.031192042 | 1.202075469 | 0.355292925 | 0.05218884   | 1.165384507 | 0.031759657  | 1.006451768 | -            | -           | -           | -       |   |   |
| chrUn      | 16054477  | 16059341  | AmelGUn1 WGA542  | 2.507493.507493.m | 4865                    | 4865           | 0.251181912 | 0.021175987 | 1.342542684 | 0.020353618 | 1.020450569 | 0.29879091   | 0.026564828 | 1.15525472   | 0.025363276 | 1.136436093  | -           | -           | -       | - |   |
| chrUn      | 293401714 | 293402894 | AmelGUn1 WGA6934 | 2.511680.511680.m | 1181                    | 1181           | 0.351397121 | 0.019491525 | 0.631704143 | 0.03220339  | 1.436485106 | 0.351397121  | 0.019491525 | 0.631704143  | 0.03220339  | 1.436485106  | -           | -           | -       | - |   |
| chr11      | 5339884   | 5346092   | AmelG11 WGA355   | 2.519232.519232.m | 6209                    | 6209           | 0.444193912 | 0.069265464 | 1.400214942 | 0.05477423  | 0.927434985 | 0.047386059  | 0.071812081 | 1.43559848   | 0.047386059 | 0.949239182  | -           | -           | -       | - |   |
| chrUn      | 31299686  | 31211691  | XM 624444        | 2006              | 2006                    | 0.28115653     | 0.008478803 | 0.434997329 | 0.021446384 | 1.100287135 | 0.307300509 | 0.009648127  | 0.417974265 | 0.023865449  | 1.032642041 | XM 624444.1  | -           | -           | -       | - |   |
| chr5       | 6600407   | 6605087   | AmelG5 WGA160    | 2.504256.504256.m | 4681                    | 3              |             |             |             |             |             |              |             |              |             |              |             |             |         |   |   |

| chromosome | start     | end       | ID              | length            | valid  | length | without | Ns | length | qContent    | cpaContent  | cpaQ/E      | qpcContent  | qpcQ/E      | nrGContent  | nrCpGContent | nrCpGQ/E     | nrGpCContent | nrGpCQ/E    | RefSeqID | version  |
|------------|-----------|-----------|-----------------|-------------------|--------|--------|---------|----|--------|-------------|-------------|-------------|-------------|-------------|-------------|--------------|--------------|--------------|-------------|----------|----------|
| chr2       | 8947011   | 8950195   | AmelG2 WGA80    | 2.501229.501229.m | 3185   | 3185   |         |    | 3090   | 0.434536892 | 0.072236181 | 1.531794958 | 0.051821608 | 1.098896383 | 0.440453074 | 0.074206092  | 1.530468189  | 0.053467272  | 1.102739088 |          |          |
| chr13      | 5881316   | 5886791   | XM 393947       |                   | 5476   | 4689   |         |    | 4504   | 0.473661762 | 0.074034564 | 1.328008576 | 0.049711969 | 0.891717574 | 0.42868206  | 0.073105082  | 1.275214689  | 0.0518008    | 0.894954887 | XM       | 393947.3 |
| chr15      | 6461990   | 6462699   | AmelG15 WGA440  | 2.508567.508567.m | 710    | 710    |         |    | 577    | 0.211267606 | 0.0         | 1.702526862 | 0.038335684 | 1.702526862 | 0.256499133 | 0            | 0.022608696  | 1.42558531   |             |          |          |
| chr10      | 2534876   | 2541564   | XM 624992       |                   | 4679   | 4679   |         |    | 3616   | 0.121885011 | 0.012326576 | 0.946490093 | 0.011326268 | 0.946490093 | 0.258011912 | 0.009159034  | 0.550994009  | 0.014324173  | 0.868232984 | XM       | 624992.2 |
| chr11      | 2752601   | 2761886   | XM 392781       |                   | 9286   | 9286   |         |    | 8514   | 0.291190385 | 0.038233731 | 1.807312436 | 0.022294023 | 0.905845684 | 0.310899695 | 0.041176471  | 1.4707804264 | 0.024235294  | 1.005164795 |          |          |
| chrUn      | 106298477 | 106301992 | AmelGUn WGA2074 | 2.507807.507807.m | 3516   | 3516   |         |    | 3414   | 0.410978385 | 0.062588905 | 1.874149446 | 0.038122333 | 0.905809208 | 0.415348565 | 0.064204046  | 1.19710365   | 0.039991498  | 0.905920481 |          |          |
| chrUn      | 287200196 | 287210417 | XM 396282       |                   | 10222  | 10222  |         |    | 5587   | 0.185580121 | 0.004207025 | 0.489659014 | 0.012425399 | 1.44617828  | 0.276355826 | 0.00702956   | 0.36991561   | 0.022350397  | 1.176141939 |          |          |
| chrUn      | 104764385 | 104765163 | AmelGUn WGA2035 | 2.505636.505636.m | 779    | 779    |         |    | 779    | 0.364569961 | 0.026992288 | 0.816388905 | 0.042416452 | 1.282896851 | 0.364569961 | 0.026992288  | 0.816388905  | 0.042416452  | 1.282896851 |          |          |
| chr15      | 1666274   | 1668904   | XM 394060       |                   | 2631   | 2631   |         |    | 2306   | 0.345115926 | 0.03878327  | 1.302496367 | 0.025855513 | 0.868330912 | 0.357328708 | 0.043043478  | 1.357685894  | 0.029565217  | 0.902551927 | XM       | 394060.3 |
| chrUn      | 45757896  | 45760704  | AmelGUn WGA905  | 2.505510.505510.m | 2809   | 2809   |         |    | 2103   | 0.270558918 | 0.020655271 | 1.130204576 | 0.025641026 | 1.03012577  | 0.3361864   | 0.027259684  | 0.967412337  | 0.033955045  | 1.230522384 |          |          |
| chr3       | 7437308   | 7488334   | XM 623358       |                   | 14627  | 14627  |         |    | 14316  | 0.399261639 | 0.064884452 | 1.62991508  | 0.036578695 | 0.918866773 | 0.405699916 | 0.066265902  | 1.612532253  | 0.037396896  | 0.910026113 | XM       | 623358.2 |
| chrUn      | 192860330 | 192861223 | XM 624360       |                   | 894    | 894    |         |    | 695    | 0.266219239 | 0.019036954 | 1.079309005 | 0.020156775 | 1.14279777  | 0.323741007 | 0.024631681  | 0.950224844  | 0.023188406  | 0.894329265 |          |          |
| chrUn      | 18294467  | 18296265  | AmelGUn WGA562  | 2.508664.508664.m | 1799   | 1799   |         |    | 1015   | 0.174544141 | 0.003893215 | 0.31968789  | 0.007230546 | 0.91021036  | 0.245320197 | 0.006951341  | 0.46837442   | 0.010923535  | 0.736016946 |          |          |
| chr9       | 1579493   | 1583855   | AmelG9 WGA285   | 2.518809.518809.m | 4363   | 4363   |         |    | 4015   | 0.42424937  | 0.067629528 | 1.504124393 | 0.037138927 | 0.825993734 | 0.444582814 | 0.07340824   | 1.48559588   | 0.040449438  | 0.818593648 |          |          |
| chrUn      | 210997372 | 210999132 | AmelGUn WGA4787 | 2.502309.502309.m | 1761   | 1761   |         |    | 1439   | 0.284497445 | 0.03125     | 1.559292538 | 0.022727273 | 1.134030937 | 0.326615705 | 0.037656904  | 1.42814911   | 0.027196653  | 1.031441024 |          |          |
| chr4       | 8102760   | 8195173   | XM 394519       |                   | 92414  | 91998  |         |    | 87865  | 0.378888671 | 0.057569598 | 1.604294286 | 0.03187199  | 0.88817803  | 0.385546008 | 0.059781246  | 1.609421714  | 0.033143443  | 0.892282794 | XM       | 394519.3 |
| chr4       | 1313473   | 1318036   | XM 392313       |                   | 4564   | 4564   |         |    | 3864   | 0.352979842 | 0.051501205 | 1.654271246 | 0.032215648 | 1.034779946 | 0.399588054 | 0.059066288  | 1.480332759  | 0.037657983  | 0.943792938 | XM       | 392313.3 |
| chrUn      | 17375700  | 17377371  | XM 396054       |                   | 1672   | 1672   |         |    | 1503   | 0.25777512  | 0.005385996 | 0.324238886 | 0.02214243  | 1.332982087 | 0.283431314 | 0.006008011  | 0.299156899  | 0.024695999  | 1.229867252 | XM       | 396054.3 |
| chrUn      | 192860330 | 192861223 | XM 624360       |                   | 894    | 894    |         |    | 695    | 0.266219239 | 0.019036954 | 1.079309005 | 0.020156775 | 1.14279777  | 0.323741007 | 0.024631681  | 0.950224844  | 0.023188406  | 0.894329265 |          |          |
| chrUn      | 101415859 | 101417941 | XM 393076       |                   | 2083   | 2083   |         |    | 1749   | 0.273163706 | 0.010086455 | 1.014298826 | 0.014409222 | 0.773284037 | 0.315037164 | 0.010248193  | 0.485847686  | 0.017211704  | 0.680468122 | XM       | 393076.3 |
| chrUn      | 191842203 | 191843224 | AmelGUn WGA4282 | 2.505142.505142.m | 1022   | 1022   |         |    | 1022   | 0.399217221 | 0.036238981 | 0.909618289 | 0.058765685 | 0.399217221 | 0.036238981 | 0.909618289  | 0.058765685  | 0.399217221  | 0.036238981 |          |          |
| chr1       | 18386537  | 18387739  | XM 394155       |                   | 1203   | 1203   |         |    | 696    | 0.193682461 | 0.003327787 | 0.361236373 | 0.015806988 | 1.715872773 | 0.280172414 | 0.005805515  | 0.303505771  | 0.021770682  | 1.13814664  | XM       | 394155.3 |
| chrUn      | 31930408  | 31931837  | XM 623386       |                   | 1430   | 1430   |         |    | 1003   | 0.213986014 | 0.009097271 | 0.826469816 | 0.015395381 | 1.398641228 | 0.284147557 | 0.012024408  | 0.624292971  | 0.021042084  | 0.892512699 | XM       | 623386.2 |
| chr15      | 1670352   | 1671405   | AmelG15 WGA427  | 2.513241.513241.m | 1054   | 1054   |         |    | 993    | 0.289373814 | 0.025641026 | 1.260909039 | 0.018043685 | 0.808199694 | 0.304128902 | 0.027245207  | 1.208778807  | 0.019712553  | 0.905622123 |          |          |
| chr8       | 6056496   | 6058989   | AmelG8 WGA266   | 2.513963.513963.m | 2494   | 2494   |         |    | 2249   | 0.309943865 | 0.016446049 | 0.698679182 | 0.028477943 | 1.209907852 | 0.335260116 | 0.018262806  | 0.662530337  | 0.031625835  | 1.147308632 |          |          |
| chr10      | 8948032   | 8950195   | AmelG10 WGA334  | 2.504532.504532.m | 2494   | 2494   |         |    | 2100   | 0.333134711 | 0.018195217 | 1.592595217 | 0.01838385  | 0.946490093 | 0.348611111 | 0.0473114    | 0.180865484  | 0.033116238  | 0.024522263 |          |          |
| chr1       | 2052774   | 2061369   | AmelG1 WGA55    | 2.503558.503558.m | 8596   | 8596   |         |    | 8242   | 0.064687735 | 0.064687735 | 1.76665658  | 0.032575708 | 0.889687238 | 0.38791267  | 0.037599348  | 0.75599348   | 0.032575708  | 1.884316218 |          |          |
| chrUn      | 235178138 | 235180621 | AmelGUn WGA5419 | 2.504988.504988.m | 2484   | 2484   |         |    | 1615   | 0.208931798 | 0.011276681 | 1.035293585 | 0.017720499 | 1.62688992  | 0.26873065  | 0.014934661  | 0.828645248  | 0.026135657  | 1.450129184 |          |          |
| chrUn      | 298788023 | 298792653 | AmelGUn WGA7074 | 2.514854.514854.m | 4631   | 4631   |         |    | 3806   | 0.223061974 | 0.006479482 | 0.524278462 | 0.016414687 | 1.28172105  | 0.260641093 | 0.007907222  | 0.468631917  | 0.01798055   | 1.175179793 |          |          |
| chrUn      | 161653921 | 161654890 | AmelGUn WGA3510 | 2.500965.500965.m | 970    | 970    |         |    | 970    | 0.403092784 | 0.049535604 | 1.229309741 | 0.048503612 | 1.203699122 | 0.304092784 | 0.049535604  | 1.229309741  | 0.048503612  | 1.203699122 |          |          |
| chr1       | 10942111  | 10947028  | XM 397118       |                   | 4918   | 4918   |         |    | 4274   | 0.324928833 | 0.023591621 | 0.898241168 | 0.028065894 | 1.068565131 | 0.363125877 | 0.027198124  | 0.829377342  | 0.032356389  | 0.986673045 | XM       | 397118.3 |
| chrUn      | 275907910 | 275915681 | AmelGUn WGA6478 | 2.507502.507502.m | 7772   | 7772   |         |    | 7231   | 0.306484817 | 0.060095226 | 2.598111934 | 0.020718054 | 0.895708825 | 0.326234269 | 0.064587665  | 2.463920578  | 0.022314622  | 0.851268698 |          |          |
| chr16      | 2301784   | 2413038   | XM 394126       |                   | 111255 | 111255 |         |    | 102147 | 0.321841769 | 0.039820063 | 1.538019941 | 0.024786325 | 0.957353127 | 0.335090915 | 0.04296151   | 1.491225379  | 0.026722336  | 0.927548313 | XM       | 394126.3 |
| chr1       | 15752572  | 15866392  | AmelGUn WGA474  | 2.502849.502849.m | 69076  | 69076  |         |    | 69076  | 0.451819116 | 0.02230247  | 1.53242491  | 0.02230247  | 1.53242491  | 0.304012934 | 0.045717328  | 0.065404122  | 0.192811238  | 0.045717328 |          |          |
| chr1       | 22819137  | 22839216  | AmelG1 WGA58    | 2.504858.504858.m | 20080  | 19980  |         |    | 1941   | 0.348048084 | 0.05656055  | 1.073630185 | 0.02893373  | 0.95837013  | 0.357139125 | 0.059072834  | 1.856185472  | 0.030138133  | 0.946998951 |          |          |
| chrUn      | 300014839 | 300015713 | AmelGUn WGA1705 | 2.503165.503165.m | 875    | 875    |         |    | 875    | 0.410285714 | 0.04576659  | 1.095686234 | 0.064073227 | 1.051860728 | 0.410285714 | 0.04576659   | 1.095686234  | 0.064073227  | 1.051860728 |          |          |
| chr16      | 4031032   | 4038025   | XM 394119       |                   | 6994   | 6994   |         |    | 6183   | 0.406634258 | 0.064493064 | 1.568863910 | 0.047047047 | 1.144469919 | 0.442665373 | 0.071787393  | 1.470618834  | 0.051693405  | 1.058978548 | XM       | 394119.2 |
| chrUn      | 8188905   | 8190039   | XM 624681       |                   | 1135   | 1135   |         |    | 769    | 0.228193833 | 0.007936508 | 0.625321586 | 0.013227513 | 1.042202644 | 0.313394018 | 0.011795544  | 0.489572195  | 0.017038008  | 0.7715938   | XM       | 624681.2 |
| chr4       | 6776533   | 6780303   | XM 394509       |                   | 3771   | 3771   |         |    | 3552   | 0.360381862 | 0.057029178 | 1.756440202 | 0.034482759 | 1.06203361  | 0.37715315  | 0.06010158   | 1.684188209  | 0.036681716  | 1.027908296 | XM       | 394509.1 |
| chr10      | 2568693   | 2573824   | XM 625034       |                   | 5132   | 5132   |         |    | 3897   | 0.247077163 | 0.011498733 | 1.878116105 | 0.018514909 | 1.069000509 | 0.305106492 | 0.015206186  | 0.868266403  | 0.024258804  | 1.087956643 | XM       | 625034.3 |
| chrUn      | 7644488   | 7644986   | XM 391986       |                   | 4517   | 4517   |         |    | 3809   | 0.234803337 | 0.009326758 | 1.068033337 | 0.017116206 | 0.922986724 | 0.482213206 | 0.015063425  | 0.702389747  | 0.023784355  | 1.11061539  | XM       | 391986.3 |
| chrUn      | 24009195  | 24037417  | XM 393342       |                   | 28223  | 28051  |         |    | 25324  | 0.295782682 | 0.03989447  | 1.824175364 | 0.024778067 | 1.3327755   | 0.316972042 | 0.043820758  | 1.74500494   | 0.026442879  | 0.052993404 | XM       | 393342.3 |
| chrUn      | 34186361  | 34188024  | XM 623288       |                   | 1664   | 1664   |         |    | 1659   | 0.356370192 | 0.016235719 | 0.512032086 | 0.016235719 | 0.512032086 | 0.357444244 | 0.01628468   | 0.518570129  | 0.02141134   | 0.864283549 | XM       | 623288.2 |
| chr5       | 13090762  | 13094271  | XM 395892       |                   | 3510   | 3510   |         |    | 2623   | 0.222222222 | 0.010829296 | 0.889548294 | 0.016234944 | 1.33422436  | 0.269919939 | 0.014564967  | 0.809474169  | 0.021464163  | 1.192909301 | XM       | 395892.3 |
| chr14      | 2585270   | 2586351   | AmelG14 WGA411  | 2.515574.515574.m | 1082   | 1082   |         |    | 957    | 0.299445271 | 0.015726179 | 0.730016484 | 0.02201665  | 1.030611507 | 0.323928945 | 0.017838405  | 0.704679323  | 0.02134313   | 0.953389672 |          |          |
| chrUn      | 203493281 |           |                 |                   |        |        |         |    |        |             |             |             |             |             |             |              |              |              |             |          |          |

| chromosome | start     | end       | ID                                | length | valid length | without Ns | non-repetitive | nr length | qcContent    | cpaContent  | cpqO/E      | qpcContent    | apcqO/E      | nrGcContent | nrCpGContent | nrCpGO/E    | nrGpCContent | nrGpCO/E    | RefSeqID | version  |
|------------|-----------|-----------|-----------------------------------|--------|--------------|------------|----------------|-----------|--------------|-------------|-------------|---------------|--------------|-------------|--------------|-------------|--------------|-------------|----------|----------|
| chr8       | 1895587   | 1903450   | AmelG8 WGA256 2.508450.508450.m   | 7864   | 7864         | 7864       | 6764           | 6764      | 0.2604272263 | 0.024799695 | 1.463301909 | 0.022256136   | 1.313219662  | 0.290508575 | 0.028457092  | 1.349285048 | 0.025344598  | 1.201760996 | -        |          |
| chr7       | 725347    | 800806    | XM 396271                         | 75460  | 73220        | 69766      | 6764           | 6766      | 0.387462444  | 0.050794908 | 1.770679225 | 0.025103802   | 0.7857103097 | 0.350844821 | 0.053247815  | 1.730374723 | 0.026315412  | 0.855162286 | XM       | 396271.3 |
| chr13      | 378915    | 383617    | XM 391949                         | 4703   | 4703         | 4703       | 4411           | 4411      | 0.302360196  | 0.018502765 | 0.1871876   | 0.027435134   | 1.203816138  | 0.019759255 | 0.019759255  | 0.76810243  | 0.025998206  | 1.151822084 | XM       | 391949.3 |
| chrUn      | 147345558 | 147347381 | XM 392802                         | 1824   | 1824         | 1824       | 1677           | 1677      | 0.246710526  | 0.00194185  | 0.14588482  | 0.018199122   | 1.273907964  | 0.29107072  | 0.002717351  | 0.13285619  | 0.023217132  | 1.11527758  | XM       | 625010.1 |
| chr12      | 6164077   | 6165209   | AmelG12 WGA388 2.505045.505045.m  | 1133   | 1133         | 932        | 932            | 932       | 0.219770521  | 0.004416961 | 0.356948394 | 0.015017668   | 2.4422454    | 0.254291845 | 0.005382133  | 0.332980658 | 0.01722282   | 1.065538106 | -        |          |
| chr14      | 7711601   | 7715434   | XM 624129                         | 3834   | 3408         | 1927       | 1927           | 1927      | 0.188673759  | 0.004698972 | 0.361036207 | 0.013215859   | 1.491083512  | 0.256357035 | 0.007310705  | 0.444807845 | 0.019438342  | 1.62156451  | XM       | 624129.2 |
| chrUn      | 151867626 | 151868986 | XM 623537                         | 1361   | 1361         | 1361       | 1361           | 1361      | 0.344599559  | 0.019117647 | 0.693211556 | 0.030147059   | 1.0931413    | 0.344599559 | 0.019117647  | 0.693211556 | 0.030147059  | 1.0931413   | XM       | 623537.2 |
| chr7       | 6104139   | 6110517   | XM 392466                         | 6379   | 6379         | 5873       | 5873           | 5873      | 0.332497257  | 0.049702101 | 1.805384257 | 0.033396049   | 1.213081536  | 0.356206368 | 0.053565336  | 1.695403099 | 0.036165311  | 1.144667061 | -        |          |
| chr5       | 7773646   | 7814295   | XM 624714                         | 40650  | 40162        | 39475      | 39475          | 39475     | 0.39024451   | 0.06407032  | 1.683496146 | 0.033715979   | 0.885912857  | 0.394046865 | 0.064966668  | 1.674290101 | 0.034092925  | 0.878626682 | -        |          |
| chrUn      | 9935450   | 9953619   | XM 393658                         | 18170  | 17906        | 14312      | 14312          | 14312     | 0.276555345  | 0.023011618 | 1.203507399 | 0.023067471   | 1.206428533  | 0.321338737 | 0.028268799  | 1.059118006 | 0.02756734   | 1.067943662 | XM       | 393658.3 |
| chrUn      | 216544479 | 216545957 | AmelGUn WGA4932 2.506486.506486.m | 1479   | 1479         | 1479       | 1479           | 1479      | 0.319810683  | 0.051420839 | 2.071761059 | 0.1962111     | 0.790540404  | 0.319810683 | 0.051420839  | 2.071761059 | 0.1962111    | 0.790540404 | -        |          |
| chrUn      | 55790602  | 55797460  | XM 392802                         | 6859   | 6809         | 3818       | 3818           | 3818      | 0.206050815  | 0.00440332  | 0.405242028 | 0.021595416   | 2.054157868  | 0.306181247 | 0.007122131  | 0.306652269 | 0.03692957   | 1.5900488   | XM       | 392802.3 |
| chr3       | 10728305  | 10784564  | XM 624198                         | 56260  | 56260        | 51980      | 51980          | 51980     | 0.329559189  | 0.048027871 | 1.76904781  | 0.028625145   | 1.041001487  | 0.348999615 | 0.051873976  | 1.703769549 | 0.030465363  | 1.000616514 | XM       | 623198.2 |
| chrUn      | 55927802  | 55938730  | AmelGUn WGA1075 2.504621.504621.m | 10929  | 10879        | 6446       | 6446           | 6446      | 0.205165916  | 0.013147007 | 1.26321216  | 0.016272869   | 1.56355631   | 0.295376978 | 0.020940772  | 0.973781954 | 0.026097828  | 1.213593928 | -        |          |
| chr11      | 5950319   | 5953881   | AmelG11 WGA357 2.502032.502032.m  | 3563   | 3563         | 3563       | 3563           | 3563      | 0.47151277   | 0.072992701 | 1.315174052 | 0.04604155    | 0.829571325  | 0.47151277  | 0.072992701  | 1.315174052 | 0.04604155   | 0.829571325 | -        |          |
| chrUn      | 44771904  | 44775075  | XM 396692                         | 3172   | 3172         | 2474       | 2474           | 2474      | 0.277742749  | 0.017660044 | 0.924331896 | 0.019236834   | 1.060861529  | 0.320129345 | 0.022339561  | 0.873543969 | 0.023558083  | 0.922191822 | XM       | 396692.3 |
| chr5       | 13143592  | 13144433  | XM 396465                         | 842    | 842          | 842        | 842            | 842       | 0.288598575  | 0.03686088  | 1.799548055 | 0.020214031   | 0.986848934  | 0.288598575 | 0.03686088   | 1.799548055 | 0.020214031  | 0.986848934 | -        |          |
| chrUn      | 9357794   | 9359731   | AmelGUn WGA493 2.508991.508991.m  | 1938   | 1938         | 1386       | 1386           | 1386      | 0.193498452  | 0.061951447 | 0.703258363 | 0.008260196   | 0.937677817  | 0.243145743 | 0.008733624  | 0.639620955 | 0.011644833  | 0.858287294 | -        |          |
| chr4       | 4257434   | 4258986   | XM 623522                         | 1553   | 1553         | 925        | 925            | 925       | 0.189954926  | 0.009664948 | 1.099321339 | 0.012886598   | 1.465761785  | 0.271351351 | 0.015267176  | 0.868087261 | 0.026292226  | 1.116112192 | XM       | 623522.2 |
| chr7       | 612313    | 613612    | XM 396269                         | 1300   | 1300         | 1103       | 1103           | 1103      | 0.27         | 0.008468052 | 0.469860413 | 0.032094688   | 1.281437491  | 0.035530372 | 0.010009599  | 0.434123356 | 0.027297543  | 1.18397279  | XM       | 396269.3 |
| chr15      | 1213843   | 1214519   | AmelG15 WGA427 2.505225.505225.m  | 677    | 677          | 677        | 677            | 677       | 0.404726736  | 0.044378698 | 1.085786814 | 0.034023669   | 0.832436557  | 0.404726736 | 0.044378698  | 1.085786814 | 0.034023669  | 0.832436557 | -        |          |
| chr5       | 6432432   | 6481650   | XM 392363                         | 49219  | 49075        | 46010      | 46010          | 46010     | 0.36639837   | 0.052660539 | 1.569314223 | 0.029509466   | 0.879389992  | 0.377526625 | 0.055388635  | 1.554730633 | 0.01312563   | 0.873313709 | -        |          |
| chrUn      | 276553802 | 276554880 | AmelGUn WGA6494 2.511510.511510.m | 1079   | 1079         | 1079       | 1079           | 1079      | 0.3197405    | 0.022263451 | 0.871144124 | 0.030612245   | 1.19782317   | 0.3197405   | 0.022263451  | 0.871144124 | 0.030612245  | 1.19782317  | -        |          |
| chr15      | 4983275   | 4985974   | AmelG15 WGA436 2.512240.512240.m  | 2700   | 2700         | 2671       | 2671           | 2671      | 0.474444444  | 0.077436087 | 1.381034934 | 0.034685124   | 0.977957752  | 0.475851741 | 0.078306482  | 1.387382505 | 0.05545148   | 0.982452683 | -        |          |
| chr3       | 11238945  | 11241353  | AmelG3 WGA122 2.508085.508085.m   | 2409   | 2409         | 2333       | 2333           | 2333      | 0.461602325  | 0.063953488 | 1.260508343 | 0.040282392   | 0.759943567  | 0.456065152 | 0.065637066  | 1.264248955 | 0.039039039  | 0.751938921 | -        |          |
| chrUn      | 16310005  | 16310005  | XM 394005                         | 479    | 479          | 550        | 550            | 550       | 0.270112285  | 0.001717747 | 0.98117474  | 0.022230764   | 1.3550569    | 0.284506927 | 0.032450692  | 1.397444731 | 0.030744671  | 1.09744673  | XM       | 394005.3 |
| chrUn      | 29152529  | 29155696  | XM 394833                         | 3168   | 3168         | 2314       | 2314           | 2314      | 0.009156931  | 0.068037954 | 0.600037954 | 0.017665933   | 0.297752809  | 0.285817154 | 0.017665933  | 0.297752809 | 0.017665933  | 0.297752809 | -        |          |
| chrUn      | 48556105  | 48561743  | XM 624766                         | 5639   | 5589         | 3565       | 3565           | 3565      | 0.222758991  | 0.009486307 | 0.767942856 | 0.016645785   | 1.547522369  | 0.301823282 | 0.013830087  | 0.609289607 | 0.024555641  | 1.081799915 | XM       | 624766.1 |
| chrUn      | 307865871 | 307868283 | AmelGUn WGA7312 2.507174.507174.m | 2413   | 2413         | 2325       | 2325           | 2325      | 0.016169154  | 0.039968673 | 0.708824094 | 0.033996663   | 1.490348095  | 0.319139785 | 0.016795866  | 0.696173408 | 0.035134384  | 1.463749217 | -        |          |
| chrUn      | 23811858  | 23815293  | AmelGUn WGA617 2.506164.506164.m  | 3436   | 3436         | 2309       | 2309           | 2309      | 0.221478463  | 0.012809316 | 1.045851345 | 0.015138282   | 1.236006135  | 0.284538761 | 0.018300654  | 0.906174186 | 0.021350763  | 1.057203217 | -        |          |
| chr14      | 5346340   | 5362708   | XM 391993                         | 16369  | 16369        | 15398      | 15398          | 15398     | 0.357016311  | 0.035190616 | 1.05629355  | 0.023880704   | 0.750522705  | 0.375048708 | 0.037321196  | 1.062670302 | 0.025357607  | 0.722023376 | XM       | 391993.2 |
| chr2       | 6533254   | 6559354   | XM 624159                         | 26101  | 26101        | 25065      | 25065          | 25065     | 0.409792728  | 0.067816092 | 1.615650479 | 0.037394636   | 0.890889576  | 0.417664740 | 0.07021608   | 1.61057781  | 0.038503016  | 0.883169093 | XM       | 624159.1 |
| chr14      | 1203842   | 1206281   | XM 394028                         | 4440   | 4440         | 3816       | 3816           | 3816      | 0.328828829  | 0.032439739 | 1.208483391 | 0.031088083   | 1.159829917  | 0.367664256 | 0.037572254  | 1.127170417 | 0.035733053  | 1.071094242 | XM       | 394028.3 |
| chrUn      | 29517469  | 2957454   | AmelG11 WGA1239 2.509300.509300.m | 1575   | 1575         | 1575       | 1575           | 1575      | 0.290806754  | 0.06832836  | 1.081626536 | 0.0398753     | 0.916160775  | 0.302176697 | 0.070366853  | 1.673936625 | 0.04952695   | 0.721955938 | -        |          |
| chr15      | 2058570   | 2070057   | XM 392063                         | 11488  | 11388        | 8493       | 8493           | 8493      | 0.266859852  | 0.017215635 | 0.97065313  | 0.027492314   | 1.550073625  | 0.332862357 | 0.022934153  | 0.833244397 | 0.036056271  | 1.308582685 | -        |          |
| chrUn      | 27174858  | 27177148  | XM 623774                         | 2291   | 2241         | 1470       | 1470           | 1470      | 0.195002231  | 0.002679768 | 0.284910041 | 0.014738723   | 1.567050228  | 0.265306122 | 0.004109589  | 0.235544849 | 0.020547945  | 1.027742097 | XM       | 623774.2 |
| chr9       | 1449726   | 1454144   | XM 623765                         | 4419   | 4419         | 3665       | 3665           | 3665      | 0.283320219  | 0.026935265 | 1.363932286 | 0.021955636   | 1.11776737   | 0.327148704 | 0.032302217  | 1.228323826 | 0.025732275  | 0.978495251 | XM       | 623765.2 |
| chrUn      | 71012952  | 71041840  | XM 396878                         | 28889  | 28389        | 21926      | 21926          | 21926     | 0.248335623  | 0.02635009  | 1.709121726 | 0.015464825   | 1.003080799  | 0.29535711  | 0.033405024  | 1.531825875 | 0.019493891  | 0.893914826 | XM       | 396878.2 |
| chrUn      | 3544657   | 3545312   | AmelGUn WGA463 2.512326.512326.m  | 656    | 656          | 571        | 571            | 571       | 0.25         | 0.007633588 | 0.534231346 | 0.02290763    | 0.26964037   | 0.278458844 | 0.008787346  | 0.492782103 | 0.026362039  | 1.47834631  | -        |          |
| chr3       | 2883322   | 2887172   | XM 395083                         | 3851   | 3851         | 2817       | 2817           | 2817      | 0.243532116  | 0.017662338 | 1.183410218 | 0.02025974    | 1.357441132  | 0.035193989 | 0.024242424  | 1.056405432 | 0.026780747  | 1.21175814  | XM       | 395083.3 |
| chrUn      | 22481036  | 22481036  | AmelGUn WGA609 2.509002.509002.m  | 1361   | 1361         | 1361       | 1361           | 1361      | 0.288814401  | 0.046749096 | 1.46749096  | 0.03498482    | 1.318172051  | 0.034194523 | 0.034194523  | 1.365044671 | 0.026191131  | 1.03019914  | -        |          |
| chr2       | 2844402   | 2850853   | XM 392745                         | 6452   | 6452         | 4827       | 4827           | 4827      | 0.230471172  | 0.00883583  | 0.671252767 | 0.016121532   | 1.224741891  | 0.28837778  | 0.01165695   | 0.565932249 | 0.021648626  | 0.501107304 | XM       | 392745.3 |
| chr16      | 4631326   | 4634054   | AmelG16 WGA545 2.509405.509405.m  | 2729   | 2429         | 1950       | 1950           | 1950      | 0.210786332  | 0.00618047  | 0.56314901  | 0.013597033   | 1.238927823  | 0.242051282 | 0.007770021  | 0.535721189 | 0.016984045  | 1.17858616  | -        |          |
| chr8       | 3131481   | 3134305   | AmelG8 WGA260 2.504777.504777.m   | 2825   | 2825         | 2649       | 2649           | 2649      | 0.246017699  | 0.011685552 | 0.779527657 | 0.014164306   | 0.944882008  | 0.258965647 | 0.012476371  | 0.751108439 | 0.015122873  | 0.910434471 | -        |          |
| chr5       | 8784147   | 8785984   | XM 397202                         | 1838   | 1838         | 1660       | 1660           | 1660      | 0.289445049  | 0.008709853 | 0.423610837 | 0.021774633</ |              |             |              |             |              |             |          |          |

| chromosome | start     | end       | ID              | length   | valid length | without Ns | nr    | length | qContent    | cpaContent  | cpqo/E      | qpcContent  | apco/E      | nrGCcontent | nrCpGcontent | nrCpGGO/E   | nrGpCContent | nrGpCCo/E   | RefSeqID    | version |
|------------|-----------|-----------|-----------------|----------|--------------|------------|-------|--------|-------------|-------------|-------------|-------------|-------------|-------------|--------------|-------------|--------------|-------------|-------------|---------|
| chrUn      | 114741478 | 114742567 | XM 624195       | 1090     | 1090         |            | 655   |        | 0.21559633  | 0.002754821 | 0.238036564 | 0.021120294 | 0.182496991 | 0.306870229 | 0.004622496  | 0.196742699 | 0.032357473  | 1.371798896 | -           |         |
| chrUn      | 205829303 | 205830277 | AmelGUn WGA4652 | 975      | 975          |            | 975   |        | 0.385641026 | 0.024640657 | 0.685153466 | 0.048254612 | 0.341758753 | 0.385641026 | 0.024640657  | 0.685153466 | 0.048254612  | 1.341758753 | -           |         |
| chrUn      | 18754826  | 18759487  | XM 397073       | 4662     | 4662         |            | 3810  |        | 0.246889747 | 0.021883716 | 0.436311761 | 0.017378245 | 1.140600516 | 0.282939633 | 0.026329647  | 1.315621356 | 0.026329647  | 1.315621356 | XM 397073.3 |         |
| chr2       | 12213868  | 12216915  | XM 623255       | 3048     | 3048         |            | 276   |        | 0.260170604 | 0.020019691 | 1.183525092 | 0.022645225 | 1.338551121 | 0.304930914 | 0.025991189  | 1.118180187 | 0.025991189  | 1.118180187 | XM 623255.2 |         |
| chr11      | 391738    | 393206    | XM 393255       | 1469     | 1469         |            | 1382  |        | 0.285908708 | 0.028610354 | 0.416998201 | 0.022479564 | 1.113355729 | 0.303183792 | 0.030478955  | 0.343220445 | 0.023947775  | 1.055387493 | -           |         |
| chrUn      | 34101053  | 34117138  | AmelGUn WGA737  | 2.512184 | 2.512184     | m          | 16086 | 16086  | 0.208255626 | 0.013242151 | 1.22621833  | 0.021309605 | 1.139864927 | 0.296032337 | 0.021501926  | 0.98721221  | 0.021501926  | 0.98721221  | 0.048690111 |         |
| chr1       | 14471974  | 14476809  | XM 393202       | 4836     | 4836         |            | 4061  |        | 0.283912324 | 0.019027921 | 0.947704274 | 0.023371251 | 1.164028076 | 0.319379463 | 0.022233202  | 0.876175696 | 0.027667984  | 1.090351977 | XM 393202.3 |         |
| chr7       | 7436926   | 7473501   | XM 623856       | 36576    | 35861        |            | 29895 |        | 0.321937481 | 0.045233978 | 1.746725274 | 0.027971443 | 1.080126665 | 0.357350728 | 0.051571313  | 0.615466758 | 0.031728445  | 0.993890681 | XM 623856.2 |         |
| chr14      | 137960    | 143016    | XM 623513       | 5057     | 5057         |            | 4749  |        | 0.371366423 | 0.064675633 | 1.886321227 | 0.034018987 | 0.992193428 | 0.38766056  | 0.068972791  | 1.846061862 | 0.036279266  | 0.970171248 | -           |         |
| chr11      | 2433386   | 2486719   | XM 391862       | 5353     | 5353         |            | 52061 |        | 0.392501104 | 0.059319592 | 1.540776039 | 0.035768485 | 0.929056018 | 0.409838846 | 0.064276149  | 1.530742213 | 0.038663464  | 0.920773837 | XM 391862.3 |         |
| chr16      | 4530297   | 4532402   | XM 396151       | 2106     | 2106         |            | 1566  |        | 0.215574549 | 0.006650831 | 0.574338136 | 0.01567696  | 1.353797034 | 0.265644959 | 0.008344001  | 0.476149715 | 0.020539153  | 1.172060838 | XM 396151.3 |         |
| chr8       | 6573311   | 6575576   | AmelG8 WGA268   | 2.507618 | 2.507618     | m          | 2054  |        | 0.319064431 | 0.034015887 | 1.37531128  | 0.035320088 | 1.392720284 | 0.344206426 | 0.038555393  | 1.306081193 | 0.039043436  | 1.322613866 | -           |         |
| chrUn      | 78895153  | 78895895  | AmelGUn WGA1501 | 2.504127 | 2.504127     | m          | 743   | 743    | 0.168102288 | 0.122641509 | 1.058538503 | 0.111859838 | 0.68102288  | 0.112654103 | 0.105853850  | 1.11859838  | 0.965480173  | -           |             |         |
| chrUn      | 198348084 | 198349042 | AmelGUn WGA4457 | 2.501469 | 2.501469     | m          | 959   | 959    | 0.402502607 | 0.021920668 | 0.546519787 | 0.099164927 | 2.47235142  | 0.402502607 | 0.021920668  | 0.546519787 | 0.099164927  | 2.47235142  | -           |         |
| chr9       | 7878      | 16929     | XM 395666       | 9052     | 8256         |            | 7431  |        | 0.307049419 | 0.023382602 | 1.002197129 | 0.022292222 | 0.955462547 | 0.333333333 | 0.02574471   | 0.936580433 | 0.024801186  | 0.902255495 | -           |         |
| chr13      | 7212806   | 7226879   | AmelG13 WGA402  | 2.500876 | 2.500876     | m          | 14074 | 14074  | 0.292169959 | 0.026931003 | 1.268610579 | 0.0233781   | 1.101247706 | 0.338136991 | 0.032746908  | 1.15033263  | 0.028043895  | 0.985125285 | -           |         |
| chr15      | 2607177   | 2611295   | XM 394082       | 4119     | 4119         |            | 3322  |        | 0.304200049 | 0.027926108 | 1.270133829 | 0.029383196 | 1.27014725  | 0.348284166 | 0.031722054  | 1.046398073 | 0.03441088   | 0.908939336 | XM 394082.3 |         |
| chrUn      | 42034824  | 42037762  | AmelGUn WGA845  | 2.506010 | 2.506010     | m          | 2939  | 2939   | 0.2667574   | 0.007828455 | 0.457273962 | 0.025187202 | 1.47113345  | 0.280869886 | 0.008483954  | 0.447519163 | 0.026927333  | 1.024386909 | -           |         |
| chrUn      | 42303958  | 42307588  | XM 393248       | 3631     | 3631         |            | 3087  |        | 0.318094189 | 0.019834711 | 0.784670563 | 0.031129477 | 1.231496856 | 0.362487852 | 0.023399415  | 0.712625883 | 0.036724082  | 1.118426734 | XM 393248.3 |         |
| chrUn      | 41389241  | 41392046  | XM 396079       | 2806     | 2806         |            | 2103  |        | 0.237348539 | 0.011764706 | 0.883841353 | 0.014973262 | 1.124889223 | 0.303520457 | 0.015781923  | 0.726477154 | 0.020086083  | 0.924607287 | XM 396079.2 |         |
| chr5       | 5055474   | 5056582   | AmelG5 WGA159   | 2.509599 | 2.509599     | m          | 1109  | 1109   | 0.318304779 | 0.041516245 | 1.648693623 | 0.027075812 | 1.075234972 | 0.318304779 | 0.041516245  | 1.648693623 | 0.027075812  | 1.075234972 | -           |         |
| chr7       | 8429095   | 8433624   | XM 394705       | 4530     | 4530         |            | 2743  |        | 0.19602649  | 0.007507176 | 0.783945975 | 0.01567675  | 1.673603654 | 0.276704338 | 0.012114537  | 0.636000873 | 0.024963289  | 1.310547257 | XM 394705.3 |         |
| chrUn      | 4115403   | 4117923   | AmelGUn WGA466  | 2.503977 | 2.503977     | m          | 2521  | 2521   | 0.321697739 | 0.023412698 | 0.906255091 | 0.03015873  | 1.167379439 | 0.314919979 | 0.029487843  | 1.200180854 | 0.026383859  | 1.073846027 | -           |         |
| chrUn      | 57439408  | 57442663  | XM 395844       | 3256     | 3256         |            | 2694  |        | 0.273955774 | 0.012903226 | 1.092276123 | 0.023041475 | 1.210310933 | 0.310690423 | 0.021524730  | 0.634765982 | 0.021747639  | 1.03199499  | XM 395844.3 |         |
| chrUn      | 67765799  | 67768010  | AmelGUn WGA1276 | 2.506128 | 2.506128     | m          | 2212  | 2212   | 0.403707052 | 0.049751244 | 1.231684121 | 0.042966983 | 1.063727196 | 0.418001885 | 0.051911279  | 1.199421545 | 0.044832468  | 1.034864062 | -           |         |
| chrUn      | 13124562  | 13124562  | XM 396043       | 1087     | 1087         |            | 127   |        | 0.40570789  | 0.021282195 | 1.361282195 | 0.021282195 | 1.361282195 | 0.40570789  | 0.021282195  | 1.361282195 | 0.021282195  | 1.361282195 | XM 396043.3 |         |
| chrUn      | 4444520   | 44461937  | XM 396643       | 1678     | 1678         |            | 1678  |        | 0.615017878 | 0.084078712 | 0.895653314 | 0.082552832 | 0.940118373 | 0.615017878 | 0.084078712  | 0.895653314 | 0.082552832  | 0.940118373 | XM 396643.2 |         |
| chr5       | 5969380   | 5975626   | XM 397146       | 6247     | 6247         |            | 4010  |        | 0.22570834  | 0.016810759 | 1.323194871 | 0.016810759 | 1.323194871 | 0.305486284 | 0.02434739   | 1.047105235 | 0.025100402  | 1.079489933 | XM 397146.3 |         |
| chrUn      | 274418896 | 274420928 | XM 623887       | 2033     | 2033         |            | 1410  |        | 0.200688637 | 0.003444882 | 0.355807763 | 0.013779528 | 1.423231052 | 0.269597447 | 0.004282655  | 1.249687592 | 0.019271949  | 1.02394165  | XM 623887.2 |         |
| chr14      | 5404595   | 5406695   | AmelG14 WGA416  | 2.501882 | 2.501882     | m          | 2101  | 2101   | 0.310804379 | 0.046666667 | 0.956892219 | 0.02047619  | 0.849333025 | 0.353300055 | 0.054038997  | 1.736388836 | 0.023398329  | 0.715183465 | -           |         |
| chrUn      | 10455137  | 10458730  | AmelGUn WGA499  | 2.504817 | 2.504817     | m          | 3594  | 3594   | 0.197551475 | 0.005009741 | 1.93736049  | 0.00807125  | 0.827676885 | 0.229547808 | 0.005886427  | 0.447388944 | 0.00934903   | 0.705858912 | -           |         |
| chr10      | 2541532   | 2552876   | XM 623719       | 11345    | 11345        |            | 7806  |        | 0.228294403 | 0.009961213 | 0.768470662 | 0.019481664 | 1.029398198 | 0.297975916 | 0.031778007  | 0.624442843 | 0.027298481  | 1.237213857 | XM 623719.2 |         |
| chr5       | 4905847   | 4907061   | AmelG5 WGA159   | 2.508096 | 2.508096     | m          | 1215  | 1215   | 0.025128807 | 0.003294893 | 0.210800177 | 0.017298188 | 1.50670932  | 0.283625731 | 0.003913894  | 0.196305633 | 0.020547945  | 1.030645722 | -           |         |
| chrUn      | 9450371   | 9450371   | AmelG1 WGA130   | 2.517606 | 2.517606     | m          | 1444  | 1444   | 0.350422195 | 0.068740629 | 1.73679456  | 0.035172468 | 1.286119468 | 0.30525013  | 0.051460182  | 1.447072692 | 0.033796969  | 1.033796969 | XM 624152.2 |         |
| chrUn      | 9095844   | 9097097   | XM 393603       | 1254     | 1254         |            | 1039  |        | 0.240829346 | 0.011173184 | 0.772240942 | 0.0207502   | 1.434160546 | 0.277189605 | 0.013513514  | 0.706275557 | 0.024131274  | 1.261206351 | XM 393603.3 |         |
| chrUn      | 213470797 | 213471771 | AmelGUn WGA4851 | 2.502644 | 2.502644     | m          | 975   | 975    | 0.356923077 | 0.019507187 | 0.627610908 | 0.045174538 | 1.43541735  | 0.356923077 | 0.019507187  | 0.627610908 | 0.045174538  | 1.261206351 | -           |         |
| chr2       | 6937789   | 6943750   | XM 392769       | 5782     | 5782         |            | 4937  |        | 0.29989623  | 0.026984951 | 1.217342294 | 0.029579657 | 1.334394437 | 0.340895281 | 0.031091242  | 1.085663431 | 0.034545824  | 1.026292701 | XM 392769.3 |         |
| chr15      | 3215468   | 3218440   | XM 392075       | 2973     | 2973         |            | 2806  |        | 0.358896737 | 0.031628533 | 1.967819681 | 0.037012113 | 1.156380477 | 0.373841768 | 0.033535498  | 0.963989273 | 0.032343667  | 1.128072554 | -           |         |
| chr10      | 6801636   | 6804752   | XM 624453       | 3117     | 3117         |            | 1976  |        | 0.206608919 | 0.009368064 | 0.872395191 | 0.018613607 | 1.744790238 | 0.285425101 | 0.014242216  | 0.702813612 | 0.027975585  | 1.380526737 | XM 624453.2 |         |
| chrUn      | 243048124 | 243050176 | AmelGUn WGA5621 | 2.506994 | 2.506994     | m          | 2033  | 2033   | 0.355319045 | 0.022904483 | 0.686731895 | 0.032651072 | 0.978958234 | 0.365203762 | 0.024071167  | 0.722248568 | 0.032447347  | 0.973465461 | -           |         |
| chr12      | 4293780   | 4293780   | XM 624152       | 5361     | 5361         |            | 441   |        | 0.417982899 | 0.067030333 | 1.561503333 | 0.067030333 | 1.561503333 | 0.417982899 | 0.067030333  | 1.561503333 | 0.067030333  | 1.561503333 | XM 624152.2 |         |
| chr14      | 2425164   | 2428864   | XM 396392       | 3701     | 3701         |            | 2836  |        | 0.275330992 | 0.014054054 | 0.748635036 | 0.030801811 | 1.641238356 | 0.338857546 | 0.018400566  | 0.649044549 | 0.03578132   | 0.83564048  | XM 396392.3 |         |
| chr14      | 6701358   | 6721888   | XM 395881       | 10831    | 10831        |            | 7914  |        | 0.231003601 | 0.013019391 | 0.993195376 | 0.015512465 | 1.183381725 | 0.297378317 | 0.017005076  | 0.885367994 | 0.020939086  | 1.090191933 | XM 395881.3 |         |
| chrUn      | 265924750 | 265925486 | AmelGUn WGA6216 | 2.509504 | 2.509504     | m          | 737   | 737    | 0.416553596 | 0.006793478 | 1.156880044 | 0.050271739 | 1.160971525 | 0.416553596 | 0.006793478  | 1.156880044 | 0.050271739  | 1.160971525 | -           |         |
| chr1       | 10953116  | 10954322  | XM 624068       | 1207     | 1207         |            | 733   |        | 0.26848767  | 0.014096186 | 0.839026561 | 0.036484245 | 2.175198157 | 0.336548767 | 0.018318966  | 0.70208506  | 0.047413793  | 1.81761332  | XM 624068.1 |         |
| chr1       | 10802242  | 10806162  | AmelG1 WGA29    | 2.509191 | 2.509191     | m          | 3921  | 3921   | 0.247385871 | 0.017091837 | 1.126818255 | 0.020153061 | 1.32863645  | 0.302475415 | 0.022789116  | 1.009020884 | 0.026530612  | 1.174681029 | -           |         |
| chrUn      | 54190207  | 54198625  | XM 624656       | 8419     | 8323         |            | 5591  |        | 0.19572269  |             |             |             |             |             |              |             |              |             |             |         |

| chromosome | start     | end       | ID              | length            | valid length | without Ns | non-repetitive | nr length | qcContent   | cpaContent  | cpqQ/E       | qpcContent  | qpcQ/E       | nrGContent  | nrCpGContent | nrCpGQ/E    | nrGpCContent | nrGpCQ/E    | RefSeqID    | version |
|------------|-----------|-----------|-----------------|-------------------|--------------|------------|----------------|-----------|-------------|-------------|--------------|-------------|--------------|-------------|--------------|-------------|--------------|-------------|-------------|---------|
| chr2       | 12178236  | 12181421  | AmelG2 WGA88    | 2.503402.503402.m | 3186         |            | 2711           |           | 0.248587571 | 0.008163265 | 0.535633005  | 0.018524333 | 0.1215468769 | 0.286241239 | 0.009626064  | 0.476064294 | 0.021843762  | 1.080299744 | -           | -       |
| chr14      | 7257752   | 7276625   | NM 001011621.1  | 18874             | 18874        |            | 17588          |           | 0.328070361 | 0.398988267 | 1.482803846  | 0.027923489 | 1.037675773  | 0.346088242 | 0.042544709  | 1.420802916 | 0.027986992  | 1.094575242 | -           | -       |
| chrUn      | 14420149  | 14422149  | AmelGUn WGA527  | 2.507325.507325.m | 2001         |            | 2001           |           | 0.234882559 | 0.0045      | 0.328891729  | 0.016       | 1.069392815  | 0.268791341 | 0.302785639  | 0.01931201  | 0.96757116   | -           | -           | -       |
| chrUn      | 8086649   | 8002649   | XM 392797       | 40281             | 4621         |            | 3281           |           | 0.235014066 | 0.01103861  | 0.81501539   | 0.02034632  | 1.502185228  | 0.292298994 | 0.051313932  | 0.696283601 | 0.026033601  | 1.184535676 | XM 392797.3 | -       |
| chr13      | 405365    | 408900    | XM 391950       | 3536              | 3536         |            | 3141           |           | 0.296059285 | 0.019326029 | 0.880056859  | 0.026591231 | 1.16549187   | 0.317096466 | 0.021398914  | 0.85652611  | 0.030022357  | 1.201693399 | XM 391950.3 | -       |
| chrUn      | 91852371  | 91853531  | AmelGUn WGA1756 | 2.508138.508138.m | 1161         |            | 1011           |           | 0.254957227 | 0.012931034 | 0.127950836  | 0.026724138 | 1.678331395  | 0.277942631 | 0.014880952  | 0.781288983 | 0.030753968  | 1.614663899 | -           | -       |
| chrUn      | 127436654 | 127437206 | AmelGUn WGA2621 | 2.504469.504469.m | 553          |            | 553            |           | 0.423146474 | 0.028985507 | 0.649236723  | 0.047101449 | 1.055009676  | 0.423146474 | 0.028985507  | 0.649236723 | 0.047101449  | 1.055009676 | -           | -       |
| chrUn      | 27367473  | 27375954  | XM 392762       | 8482              | 8432         |            | 7309           |           | 0.311669829 | 0.031909846 | 1.314011588  | 0.031079478 | 1.279817978  | 0.343412231 | 0.036904925  | 1.252086749 | 0.035944574  | 1.219504566 | -           | -       |
| chrUn      | 38455102  | 38458606  | AmelGUn WGA792  | 2.509682.509682.m | 3505         |            | 3505           |           | 0.195282026 | 0.005136986 | 0.568868581  | 0.010844749 | 1.200944787  | 0.249790092 | 0.007598143  | 0.508112157 | 0.015196285  | 1.016224314 | -           | -       |
| chrUn      | 24609632  | 24612915  | XM 625133       | 3284              | 3284         |            | 2382           |           | 0.248781973 | 0.013706975 | 0.014873121  | 0.020712763 | 1.373735818  | 0.319825708 | 0.018404908  | 0.743780243 | 0.028921998  | 1.168797525 | XM 625133.1 | -       |
| chrUn      | 104867767 | 104877760 | XM 624411       | 9994              | 9994         |            | 7579           |           | 0.291574945 | 0.017412189 | 0.830550323  | 0.028418493 | 1.260145317  | 0.346351761 | 0.021854305  | 0.743904225 | 0.032715232  | 1.113602082 | XM 624411.2 | -       |
| chrUn      | 28292499  | 28297481  | XM 623592       | 3533              | 3533         |            | 2625           |           | 0.218228145 | 0.015191914 | 1.312796442  | 0.014439411 | 1.217320337  | 0.268952381 | 0.019908116  | 1.104423709 | 0.01914242   | 1.061945874 | XM 623592.1 | -       |
| chrUn      | 57175035  | 57177468  | AmelGUn WGA1095 | 2.512637.512637.m | 2434         |            | 2434           |           | 0.205012325 | 0.012741741 | 1.212649607  | 0.007945335 | 0.899707773  | 0.276708693 | 0.018679119  | 0.975962717 | 0.014676451  | 0.766827849 | -           | -       |
| chr1       | 9852      | 70368     | AmelG1 WGA1     | 2.500839.500839.m | 60517        |            | 60327          |           | 0.309330814 | 0.041143804 | 1.720117171  | 0.02784915  | 1.164301711  | 0.33013564  | 0.044300304  | 1.625870815 | 0.030992469  | 1.137458354 | -           | -       |
| chr3       | 10343915  | 10352945  | AmelG3 WGA120   | 2.501238.501238.m | 9031         |            | 9031           |           | 0.331081829 | 0.049058693 | 1.791141759  | 0.021040975 | 0.768209784  | 0.344047343 | 0.051133062  | 1.728863234 | 0.022080186  | 0.746554578 | -           | -       |
| chr9       | 4110106   | 4110872   | AmelG9 WGA287   | 2.504616.504616.m | 767          |            | 767            |           | 0.297262005 | 0.010443864 | 0.484849309  | 0.024804178 | 1.155171109  | 0.307692308 | 0.01082544   | 0.469069074 | 0.025710419  | 1.11403905  | -           | -       |
| chr10      | 9093088   | 9142035   | AmelG10 WGA335  | 2.505033.505033.m | 48948        |            | 48947          |           | 0.34948006  | 0.049136786 | 1.613456181  | 0.029502503 | 0.968744584  | 0.368028841 | 0.052555098  | 1.555428273 | 0.03172681   | 0.939991262 | -           | -       |
| chr13      | 876746    | 914212    | XM 624631       | 37467             | 37467        |            | 31343          |           | 0.431835797 | 0.070453027 | 1.154695074  | 0.043271415 | 0.930307786  | 0.464250391 | 0.082436587  | 1.531467533 | 0.050441968  | 0.937086777 | -           | -       |
| chrUn      | 46858049  | 46860232  | AmelGUn WGA924  | 2.508850.508850.m | 2184         |            | 2184           |           | 0.325181445 | 0.046011108 | 1.742374135  | 0.028528149 | 1.080319766  | 0.353667124 | 0.052355632  | 1.675839783 | 0.032461979  | 1.039068274 | XM 392101.3 | -       |
| chrUn      | 23701130  | 2376998   | AmelG9 WGA286   | 2.501943.501943.m | 6869         |            | 6869           |           | 0.290695971 | 0.01053596  | 0.928721005  | 0.013742556 | 1.31276558   | 0.319248826 | 0.018138801  | 0.792324727 | 0.022870662  | 0.999018134 | -           | -       |
| chr9       | 4518864   | 4539101   | XM 396471       | 20238             | 20188        |            | 18256          |           | 0.424071916 | 0.069452533 | 1.544933841  | 0.039312755 | 0.874490854  | 0.427748227 | 0.070520402  | 1.541828655 | 0.039917209  | 0.872733201 | -           | -       |
| chr5       | 5526981   | 5552284   | XM 396228       | 25304             | 25045        |            | 24519          |           | 0.299782049 | 0.033339939 | 0.498097974  | 0.022788071 | 1.017120008  | 0.322962314 | 0.036650938  | 1.409430416 | 0.02507407   | 0.964236078 | XM 396471.3 | -       |
| chr15      | 19786796  | 197870305 | XM 623324       | 3510              | 3510         |            | 2850           |           | 0.413894989 | 0.056622609 | 1.932766166  | 0.036736813 | 0.835860982  | 0.419552184 | 0.057824934  | 1.3152884   | 0.037420935  | 0.851178167 | XM 396228.3 | -       |
| chr11      | 937501    | 938138    | AmelG11 WGA349  | 2.516725.516725.m | 638          |            | 638            |           | 0.259259259 | 0.015104018 | 0.303311222  | 0.021943574 | 1.31237814   | 0.305614035 | 0.018329221  | 0.790841616 | 0.025788861  | 1.155845439 | XM 623324.2 | -       |
| chrUn      | 3061470   | 306230881 | AmelGUn WGA7639 | 2.508512.508512.m | 810          |            | 810            |           | 0.230407524 | 0.007849254 | 0.631424476  | 0.017268446 | 1.389133848  | 0.270216963 | 0.009920635  | 0.586227422 | 0.01984127   | 1.17245844  | -           | -       |
| chr2       | 250330072 | 250350881 | AmelGUn WGA7639 | 2.508512.508512.m | 810          |            | 810            |           | 0.196474928 | 0.007849254 | 0.631424476  | 0.017268446 | 1.389133848  | 0.270216963 | 0.009920635  | 0.586227422 | 0.01984127   | 1.17245844  | XM 394923.3 | -       |
| chr6       | 2506272   | 2509870   | XM 393219       | 3599              | 3599         |            | 2694           |           | 0.271604938 | 0.003708284 | 0.031057744  | 0.017305315 | 0.942646806  | 0.004379565 | 0.024375658  | 0.182374568 | 0.020437956  | 0.85811316  | -           | -       |
| chr14      | 203573    | 206955    | XM 394049       | 2883              | 2883         |            | 2812           |           | 0.23286746  | 0.014452474 | 1.073825546  | 0.018621456 | 1.383630588  | 0.29064588  | 0.018656716  | 0.885396304 | 0.02466886   | 1.168723121 | XM 393219.3 | -       |
| chr5       | 7714796   | 7720357   | AmelG5 WGA162   | 2.508765.508765.m | 5562         |            | 5562           |           | 0.403746098 | 0.056210965 | 1.392207279  | 0.064148508 | 1.412984988  | 0.40672831  | 0.055891776  | 1.344347251 | 0.046991812  | 1.130279217 | XM 394049.3 | -       |
| chr10      | 6320549   | 6322332   | XM 393720       | 1784              | 1784         |            | 1211           |           | 0.276159655 | 0.032548013 | 1.707776018  | 0.020320086 | 1.066180608  | 0.294833433 | 0.03585766   | 1.637868692 | 0.021391443  | 0.904561517 | -           | -       |
| chr1       | 5090963   | 5100264   | XM 397542       | 9302              | 9302         |            | 7160           |           | 0.225896861 | 0.00897364  | 0.713108838  | 0.016264722 | 1.292509769  | 0.284888522 | 0.011627907  | 0.580493252 | 0.02486379   | 1.02450307  | XM 393720.3 | -       |
| chrUn      | 2333752   | 2334937   | XM 395310       | 1186              | 1186         |            | 9302           |           | 0.267684369 | 0.015697237 | 0.877085548  | 0.02021288  | 1.12939783   | 0.323603352 | 0.020310968  | 0.776400466 | 0.025913994  | 0.905079905 | XM 397542.3 | -       |
| chrUn      | 2880966   | 2881961   | XM 395310       | 1186              | 1186         |            | 9302           |           | 0.354974705 | 0.016877637 | 0.551452192  | 0.043037975 | 1.06620309   | 0.354974705 | 0.016877637  | 0.551452192 | 0.043037975  | 1.06620309  | XM 395310.3 | -       |
| chr3       | 3498802   | 3531070   | XM 623849       | 1269              | 1269         |            | 1024           |           | 0.28906985  | 0.019207176 | 1.278398307  | 0.023673698 | 1.802309523  | 0.332183699 | 0.03846985   | 1.539879807 | 0.021973477  | 0.98241653  | XM 393382.3 | -       |
| chrUn      | 24295811  | 24297678  | AmelGUn WGA621  | 2.510172.510172.m | 1868         |            | 1868           |           | 0.263987392 | 0.012618297 | 0.735273299  | 0.02760524  | 1.60841032   | 0.314453125 | 0.014720314  | 0.606807721 | 0.033366045  | 1.375430835 | -           | -       |
| chrUn      | 67494584  | 67499091  | XM 623447       | 4508              | 4458         |            | 3135           |           | 0.22751606  | 0.012319229 | 0.963747892  | 0.01178361  | 1.429284539  | 0.272126816 | 0.015272244  | 0.835349164 | 0.014608234  | 0.799029635 | -           | -       |
| chr5       | 4034407   | 4036105   | XM 623614       | 1699              | 1699         |            | 1459           |           | 0.234410009 | 0.015933573 | 1.161518211  | 0.022441652 | 1.635941142  | 0.29569378  | 0.02178091   | 0.999708966 | 0.030108905  | 1.138195063 | XM 623447.2 | -       |
| chrUn      | 53824315  | 53825630  | XM 395475       | 1316              | 1316         |            | 1009           |           | 0.334314303 | 0.016489988 | 0.5945714    | 0.030624264 | 1.103248975  | 0.334314303 | 0.016489988  | 0.5945714   | 0.030624264  | 1.103248975 | XM 623614.2 | -       |
| chrUn      | 319643055 | 319649050 | XM 624470       | 5996              | 5996         |            | 5097           |           | 0.240881459 | 0.010646388 | 0.734352357  | 0.020532319 | 1.41658117   | 0.291377602 | 0.013930348  | 0.656797244 | 0.026865672  | 1.266680998 | XM 395475.5 | -       |
| chrUn      | 5747058   | 5748911   | XM 624470       | 5996              | 5996         |            | 5097           |           | 0.288358906 | 0.00806672  | 0.388878993  | 0.020850709 | 1.01270571   | 0.321366509 | 0.008654603  | 0.338597793 | 0.021439811  | 0.838799078 | XM 624470.2 | -       |
| chrUn      | 17146951  | 17150826  | AmelGUn WGA552  | 2.513172.513172.m | 3876         |            | 3876           |           | 0.204178846 | 0.007813231 | 0.655829674  | 0.019338415 | 1.501925816  | 0.285935913 | 0.056192576  | 1.781911419 | 0.02895912   | 1.395911.3  | XM 395911.3 | -       |
| chrUn      | 82449961  | 82451506  | AmelGUn WGA1571 | 2.502959.502959.m | 1546         |            | 1496           |           | 0.210268318 | 0.00361290  | 0.326975925  | 0.014193548 | 0.984548278  | 0.278447626 | 0.050370051  | 0.713880184 | 0.019711903  | 0.17269256  | -           | -       |
| chr1       | 1191855   | 1347018   | AmelG1 WGA1     | 2.505014.505014.m | 155164       |            | 152798         |           | 0.217914439 | 0.004685408 | 0.1487178952 | 0.013178849 | 1.281577456  | 0.361199574 | 0.006673022  | 0.83583888  | 0.01620591   | 0.813713227 | -           | -       |
| chr1       | 5110917   | 5115402   | XM 394880       | 4486              | 4448         |            | 3691           |           | 0.369808055 | 0.060724664 | 1.776116605  | 0.032659633 | 0.95525187   | 0.385449597 | 0.064783853  | 1.744181423 | 0.034894355  | 0.939468679 | -           | -       |
| chr10      | 3812893   | 3816090   | XM 624898       | 3198              | 3198         |            | 2697           |           | 0.281319661 | 0.0303233   | 1.541546645  | 0.022519509 | 1.025815082  | 0.327282579 | 0.036996736  | 1.389645228 | 0.027203482  | 1.012779762 | XM 394880.2 | -       |
| chr15      | 1214800   | 1216795   | AmelG15 WGA427  | 2.505392.505392.m | 1996         |            | 1996           |           | 0.24796748  | 0.011886143 | 0.790441588  | 0.020643454 | 1.372872233  | 0.279940675 | 0.013759762  | 0.719007763 | 0.02454444   | 1.282554388 | XM 624898.2 | -       |
| chr4       | 4339470   | 4344658   | AmelG1 WGA8     | 2.501186.50118    |              |            |                |           |             |             |              |             |              |             |              |             |              |             |             |         |

| chromosome | start     | end       | ID                                | length | valid length | without Ns | non-repetitive | nr length | qcContent   | cpaContent  | cpqC/E      | qpcContent  | qpcC/E      | nrGcContent  | nrCpGContent | nrCpGContent | nrCpGContent | nrCpGContent | nrCpGContent | RefSeqID | version |
|------------|-----------|-----------|-----------------------------------|--------|--------------|------------|----------------|-----------|-------------|-------------|-------------|-------------|-------------|--------------|--------------|--------------|--------------|--------------|--------------|----------|---------|
| chrUn      | 41396213  | 41399572  | XM 624816                         | 3360   | 3310         |            |                | 1637      | 0.174320242 | 0.009068924 | 0.012998791 | 0.174823022 | 0.285277947 | 0.017273288  | 0.851829628  | 0.025293029  | 1.247321955  | XM 624816.1  | -            |          |         |
| chr14      | 4208947   | 4212612   | NM 001011627.1                    | 3666   | 3666         |            |                | 3036      | 0.293235134 | 0.025102319 | 0.173495943 | 0.021282401 | 0.095683517 | 0.340250329  | 0.03042328   | 1.057663281  | 0.025462963  | 0.885218181  | -            |          |         |
| chr16      | 2675140   | 2723862   | XM 394125                         | 48723  | 44018        |            |                | 38724     | 0.373051933 | 0.048443536 | 0.139277453 | 0.028243581 | 0.08201632  | 0.390274765  | 0.053808629  | 1.413850291  | 0.027755969  | XM 394125.3  | -            |          |         |
| chr5       | 13057234  | 13059125  | XM 393583                         | 1892   | 1892         |            |                | 1525      | 0.255813953 | 0.015358011 | 0.950104108 | 0.019375546 | 0.179439582 | 0.009095508  | 0.010901508  | 0.02041475   | 1.0373917    | XM 393583.3  | -            |          |         |
| chr14      | 2444242   | 24443931  | AmelG14 WGA410 2.513403.513403.m  | 1510   | 1510         |            |                | 1187      | 0.254966887 | 0.01259112  | 0.774788487 | 0.021868787 | 0.134858267 | 0.308340354  | 0.016088061  | 0.677189949  | 0.027024422  | 1.176172017  | -            |          |         |
| chrUn      | 37172629  | 37177220  | AmelGUn WGA774 2.503837.503837.m  | 4592   | 4592         |            |                | 4172      | 0.268292683 | 0.013722501 | 0.772538722 | 0.021995954 | 0.23851446  | 0.291466922  | 0.01512605   | 0.722054673  | 0.0242497    | 1.157579714  | -            |          |         |
| chrUn      | 83113431  | 83115730  | AmelGUn WGA1582 2.503627.503627.m | 2300   | 2300         |            |                | 1531      | 0.211304348 | 0.008699345 | 0.785793711 | 0.01522401  | 1.375138995 | 0.286087524  | 0.012483574  | 0.614249662  | 0.021681997  | 1.066854677  | -            |          |         |
| chr15      | 1866508   | 1868414   | NM 001011595.1                    | 1907   | 1907         |            |                | 1790      | 0.34189827  | 0.058761805 | 2.013493185 | 0.025183631 | 0.862925651 | 0.363687151  | 0.062674874  | 0.02686066   | 0.81332327   | XM 1866508.1 | -            |          |         |
| chrUn      | 209909191 | 209910290 | XM 624246                         | 1100   | 1100         |            |                | 466       | 0.167272012 | 0.004549591 | 0.659835137 | 0.010919017 | 1.583604329 | 0.286999571  | 0.008714597  | 0.432653639  | 0.023965142  | 1.189797506  | XM 624246.2  | -        |         |
| chr9       | 820954    | 820948    | AmelGUn WGA284 2.508622.508622.m  | 8095   | 8095         |            |                | 7809      | 0.480420027 | 0.080182851 | 0.139076388 | 0.041265135 | 0.171395556 | 0.484697144  | 0.082532359  | 1.405925825  | 0.042547738  | 0.02794059   | -            |          |         |
| chr14      | 2709527   | 2711700   | XM 393995                         | 1774   | 1774         |            |                | 1473      | 0.277903044 | 0.013536379 | 0.722257996 | 0.020304569 | 1.083859494 | 0.323150034  | 0.015678255  | 0.622815585  | 0.023858214  | 0.947762846  | XM 393995.3  | -        |         |
| chrUn      | 42847046  | 42847727  | XM 624727                         | 682    | 682          |            |                | 625       | 0.290322581 | 0.01612717  | 0.784557267 | 0.022026432 | 1.068864556 | 0.3136       | 0.017656501  | 0.735373774  | 0.024077047  | 1.002782419  | -            |          |         |
| chr3       | 7809223   | 7811980   | XM 624103                         | 2758   | 2758         |            |                | 2503      | 0.288252357 | 0.027566195 | 0.134240737 | 0.021762786 | 0.059795274 | 0.309076369  | 0.030436524  | 1.290802678  | 0.024028835  | 1.019054746  | XM 624103.1  | -        |         |
| chrUn      | 24139955  | 24142523  | AmelGUn WGA620 2.508001.508001.m  | 2569   | 2569         |            |                | 1921      | 0.260023355 | 0.011292835 | 0.671278259 | 0.016744548 | 0.995343626 | 0.321707444  | 0.015159435  | 0.587891277  | 0.021955044  | 0.851428745  | -            |          |         |
| chr11      | 887669    | 890907    | XM 625135                         | 3239   | 3239         |            |                | 3014      | 0.312133374 | 0.025633107 | 1.094817513 | 0.020382952 | 0.870577781 | 0.328135368  | 0.027593085  | 1.063926118  | 0.021609043  | 0.833195152  | XM 625135.2  | -        |         |
| chr6       | 3638711   | 3640947   | XM 397407                         | 2237   | 2237         |            |                | 1797      | 0.289226643 | 0.011627907 | 0.565778072 | 0.02862254  | 1.392684486 | 0.345019477  | 0.01451703   | 0.494859366  | 0.035734227  | 1.218115363  | XM 397407.2  | -        |         |
| chr11      | 3220462   | 3222827   | XM 393824                         | 2366   | 2366         |            |                | 1978      | 0.269237069 | 0.014376321 | 0.807039855 | 0.014376321 | 0.807039855 | 0.312436805  | 0.017267649  | 0.719628026  | 0.017267649  | 0.719628026  | XM 393824.2  | -        |         |
| chrUn      | 233055587 | 233057306 | AmelGUn WGA5362 2.518180.518180.m | 1720   | 1720         |            |                | 1720      | 0.36627907  | 0.02443281  | 0.730350154 | 0.048283886 | 1.443311019 | 0.36627907   | 0.02443281   | 0.730350154  | 0.048283886  | 1.443311019  | -            |          |         |
| chr15      | 4232738   | 4236092   | XM 397553                         | 3355   | 3355         |            |                | 2023      | 0.203278689 | 0.008348241 | 0.808139257 | 0.015205725 | 1.471967932 | 0.282254078  | 0.013446215  | 0.675169628  | 0.023406375  | 1.175295279  | -            |          |         |
| chr1       | 5274681   | 5278027   | AmelG1 WGA414 2.505680.505680.m   | 3347   | 3347         |            |                | 2976      | 0.285031371 | 0.025702331 | 1.266012803 | 0.026887788 | 1.34497119  | 0.311491935  | 0.028311426  | 1.168297254  | 0.0303367    | 1.251747058  | -            |          |         |
| chr15      | 2891297   | 2931807   | XM 625220                         | 40511  | 39491        |            |                | 38085     | 0.424988207 | 0.070276293 | 1.556677051 | 0.039937195 | 0.88461337  | 0.429329132  | 0.072419957  | 1.571936695  | 0.041165028  | 0.893521911  | XM 625220.2  | -        |         |
| chr16      | 4621843   | 4623666   | XM 624693                         | 1824   | 1824         |            |                | 999       | 0.20120614  | 0.010422381 | 1.042794732 | 0.021616566 | 1.262330465 | 0.321321321  | 0.019230769  | 0.764330025  | 0.022672806  | 1.085013713  | XM 624693.2  | -        |         |
| chrUn      | 1291785   | 1295655   | XM 394725                         | 3871   | 3871         |            |                | 3070      | 0.269956084 | 0.016795866 | 0.938005534 | 0.023514212 | 1.313207747 | 0.322149837  | 0.021255723  | 0.833436206  | 0.02910399   | 1.141166497  | XM 394725.3  | -        |         |
| chrUn      | 251562054 | 251567033 | XM 395622                         | 4980   | 4980         |            |                | 3526      | 0.224093686 | 0.010443864 | 0.834656346 | 0.019481824 | 1.573760356 | 0.288428815  | 0.013976041  | 0.685166483  | 0.026525956  | 1.300418019  | XM 395622.3  | -        |         |
| chr5       | 12737786  | 12738929  | AmelG5 WGA174 2.516283.516283.m   | 1144   | 1144         |            |                | 585       | 0.184440559 | 0.005249344 | 0.63271369  | 0.016622922 | 2.003593353 | 0.271794872  | 0.006908463  | 0.37743434   | 0.029360687  | 1.604095944  | -            |          |         |
| chr12      | 48524124  | 48524124  | AmelG12 WGA498 2.504710.504710.m  | 124    | 124          |            |                | 104       | 0.507656225 | 0.345856225 | 0.345856225 | 0.345856225 | 0.345856225 | 0.345856225  | 0.345856225  | 0.345856225  | 0.345856225  | 0.345856225  | 0.345856225  | -        |         |
| chrUn      | 132491178 | 132491178 | AmelGUn WGA2748 2.509479.509479.m | 536    | 536          |            |                | 536       | 0.285447778 | 0.009345794 | 0.72535622  | 0.013084112 | 0.662955271 | 0.285447778  | 0.009345794  | 0.72535622   | 0.013084112  | 0.662955271  | 1.604095944  | -        |         |
| chr12      | 1650230   | 1651605   | XM 623244                         | 1376   | 1376         |            |                | 868       | 0.229651613 | 0.009454545 | 0.72056553  | 0.018181818 | 1.385702942 | 0.320276498  | 0.015098722  | 0.591839126  | 0.029036005  | 1.138152165  | XM 623244.2  | -        |         |
| chr1       | 15936455  | 15939081  | AmelG1 WGA45 2.500512.500512.m    | 2627   | 2627         |            |                | 2027      | 0.238675295 | 0.01297444  | 0.79178576  | 0.02676267  | 0.291705408 | 0.19077505   | 0.016865079  | 0.799230005  | 0.02281746   | 1.08311183   | -            |          |         |
| chrUn      | 99140604  | 99149735  | XM 623084                         | 9132   | 9132         |            |                | 5915      | 0.212987297 | 0.014675282 | 1.294646972 | 0.015660935 | 1.381600873 | 0.279459003  | 0.021583956  | 1.105490457  | 0.022603671  | 1.157718353  | XM 623084.2  | -        |         |
| chr1       | 4762965   | 4764499   | XM 623597                         | 1535   | 1535         |            |                | 1073      | 0.246905537 | 0.007170795 | 0.474553622 | 0.01629762  | 1.07853096  | 0.284367636  | 0.00789266   | 0.395237605  | 0.01973165   | 0.988094013  | XM 623597.2  | -        |         |
| chr6       | 9291433   | 9298734   | XM 392408                         | 7302   | 7302         |            |                | 6121      | 0.300328677 | 0.027941378 | 1.243696857 | 0.024380222 | 1.085186473 | 0.343244568  | 0.033426184  | 1.139418548  | 0.028674422  | 0.974242382  | XM 392408.2  | -        |         |
| chrUn      | 34161187  | 34164044  | XM 395073                         | 3218   | 3218         |            |                | 2726      | 0.24611156  | 0.008703761 | 0.581301813 | 0.016785825 | 1.121082068 | 0.010297904  | 0.010297904  | 0.545551469  | 0.01949246   | 1.032650995  | XM 395073.3  | -        |         |
| chrUn      | 64509126  | 64509127  | AmelGUn WGA1209 2.506962.506962.m | 1580   | 1580         |            |                | 1580      | 0.23581206  | 0.019520131 | 0.79520131  | 0.019520131 | 0.79520131  | 0.019520131  | 0.79520131   | 0.019520131  | 0.79520131   | 0.019520131  | 0.79520131   | -        |         |
| chr11      | 3559881   | 3563852   | AmelG11 WGA355 2.509880.509880.m  | 3972   | 3972         |            |                | 3693      | 0.342145053 | 0.054898011 | 1.884667561 | 0.030219088 | 1.073431685 | 0.364202545  | 0.05917481   | 1.793423985  | 0.03257329   | 0.987205863  | -            |          |         |
| chrUn      | 312514423 | 312515026 | AmelGUn WGA473 2.502165.502165.m  | 604    | 604          |            |                | 604       | 0.321192053 | 0.011608624 | 0.470086759 | 0.026533997 | 1.07448402  | 0.032119205  | 0.016806572  | 0.470086759  | 0.026533997  | 1.07448402   | -            |          |         |
| chr8       | 6482827   | 6491670   | XM 397456                         | 8844   | 8844         |            |                | 7111      | 0.271935776 | 0.020807418 | 1.125894169 | 0.021259753 | 1.150370129 | 0.319504992  | 0.025250388  | 0.990139253  | 0.026237833  | 1.028859782  | -            |          |         |
| chrUn      | 225071011 | 225075671 | XM 625240                         | 5571   | 5571         |            |                | 3974      | 0.215939688 | 0.017235189 | 1.478637819 | 0.013285458 | 1.397873318 | 0.269753397  | 0.022767518  | 1.251536019  | 0.018214015  | 1.001228815  | -            |          |         |
| chr1       | 12563746  | 12568875  | XM 623505                         | 5130   | 5130         |            |                | 3852      | 0.219883041 | 0.00916358  | 0.77104365  | 0.015792552 | 1.083819907 | 0.267912773  | 0.012261936  | 0.697288615  | 0.023049596  | 1.157202383  | XM 623505.2  | -        |         |
| chr5       | 5959992   | 5962305   | XM 394554                         | 2134   | 2134         |            |                | 2269      | 0.345289542 | 0.029313965 | 0.789517968 | 0.030263727 | 1.016344486 | 0.352137506  | 0.023389322  | 0.755225725  | 0.030891439  | 0.997467939  | XM 394554.1  | -        |         |
| chrUn      | 684272604 | 684272604 | AmelG11 WGA411 2.504826.504826.m  | 6024   | 6024         |            |                | 5136      | 0.193141852 | 0.014914852 | 0.789517968 | 0.030263727 | 1.016344486 | 0.352137506  | 0.023389322  | 0.755225725  | 0.030891439  | 0.997467939  | XM 394554.1  | -        |         |
| chr12      | 3697110   | 4010353   | AmelG12 WGA385 2.502038.502038.m  | 31244  | 31244        |            |                | 2799      | 0.371428847 | 0.05706302  | 0.64306491  | 0.032453931 | 0.941067598 | 0.380063816  | 0.058794776  | 1.628284319  | 0.033594145  | 1.930368706  | -            |          |         |
| chr5       | 9320324   | 9321267   | XM 392371                         | 944    | 944          |            |                | 886       | 0.274364407 | 0.018027572 | 0.975766401 | 0.021208908 | 1.074960472 | 0.0389939052 | 0.019230769  | 0.793979883  | 0.022624434  | 1.105858686  | XM 392371.3  | -        |         |
| chrUn      | 12397374  | 12424731  | AmelGUn WGA513 2.508826.508826.m  | 27358  | 27201        |            |                | 23906     | 0.301128635 | 0.029267934 | 1.297413646 | 0.025333677 | 1.123012566 | 0.33025182   | 0.03279376   | 1.20851081   | 0.028390506  | 1.046242735  | -            |          |         |
| chr16      | 535999    | 542886    | XM 394136                         | 6788   | 6788         |            |                | 5241      | 0.256678281 | 0.016988529 | 1.041748114 | 0.021403383 | 1.478035786 | 0.305285251  | 0.032186536  | 0.944854839  | 0.033633735  | 1.126112055  | XM 394136.3  | -        |         |
| chr1       | 5289282   | 5297505   | XM 623175                         | 8224   | 8174         |            |                | 6161      | 0.246880352 | 0.02029511  | 1.373569624 | 0.022883015 | 1.502090759 | 0.299788995  |              |              |              |              |              |          |         |

| chromosome | start     | end       | ID                                | length | valid length | without Ns | non-repetitive | nr length | qcContent   | cpaContent  | cpaQ/E       | qpcContent  | qpcQ/E       | nrGCcontent | nrCpGContent | nrCpGQ/E     | nrGpCContent  | nrGpCQ/E    | RefSeqID    | version |
|------------|-----------|-----------|-----------------------------------|--------|--------------|------------|----------------|-----------|-------------|-------------|--------------|-------------|--------------|-------------|--------------|--------------|---------------|-------------|-------------|---------|
| chr13      | 44639     | 48729     | XM 393886                         | 4151   | 4151         |            | 3883           |           | 0.380631173 | 0.05686747  | 0.1601676515 | 0.032771084 | 0.923000026  | 0.389132114 | 0.059824652  | 0.1601809718 | 0.034553894   | 0.925183199 | XM 393886.2 |         |
| chr3       | 1447415   | 1451227   | AmelG3 WGA100.2.501567.501567.m   | 3813   | 3813         |            | 3229           |           | 0.241279832 | 0.021773347 | 0.1496103434 | 0.02019937  | 0.387951379  | 0.270981728 | 0.025465839  | 1.387343185  | 0.023913043   | 1.302749088 |             |         |
| chrUn      | 113228844 | 113231372 | AmelGUn WGA2254.2.502798.502798.m | 2529   | 2529         |            | 1041           |           | 0.15539739  | 0.006329114 | 0.106230066  | 0.01068038  | 0.1792631362 | 0.28049952  | 0.034563107  | 0.759213072  | 0.023300971   | 1.214740916 |             |         |
| chrUn      | 145952135 | 146064158 | XM 624959                         | 2024   | 2024         |            | 1786           |           | 0.290513824 | 0.0192783   | 0.91674718   | 0.02372138  | 1.28304221   | 0.325307951 | 0.026951435  | 0.83144325   | 0.026951151   | 1.02314769  |             |         |
| chr9       | 4003601   | 4005347   | AmelG9 WGA287.2.503614.503614.m   | 1837   | 1837         |            | 1796           |           | 0.433770822 | 0.081154684 | 0.1734028652 | 0.039215686 | 0.837919586  | 0.428173719 | 0.078037904  | 1.704452156  | 0.040133779   | 0.876575394 |             |         |
| chrUn      | 15124489  | 15129195  | AmelGUn WGA534.2.516844.516844.m  | 4707   | 4657         |            | 3666           |           | 0.250161048 | 0.009022556 | 0.596297818  | 0.02406511  | 0.580345915  | 0.299509002 | 0.010937927  | 0.501194629  | 0.030621966   | 1.403344962 |             |         |
| chrUn      | 19146150  | 19149169  | AmelGUn WGA569.2.505325.505325.m  | 3020   | 3020         |            | 2700           |           | 0.425165563 | 0.063597218 | 0.141486641  | 0.050347797 | 1.120103549  | 0.464074074 | 0.070605723  | 1.322510301  | 0.056484578   | 1.058008241 |             |         |
| chr8       | 7704994   | 7706835   | AmelG8 WGA274.2.513797.513797.m   | 1842   | 1842         |            | 1842           |           | 0.513029316 | 0.068984248 | 0.150571689  | 0.067897882 | 1.034027253  | 0.513029316 | 0.068984248  | 0.150571689  | 0.067897882   | 1.034027253 |             |         |
| chrUn      | 266069718 | 266071665 | AmelGUn WGA6220.2.512677.512677.m | 1948   | 1948         |            | 1909           |           | 0.325973539 | 0.023112481 | 0.894492842  | 0.035439137 | 1.37155569   | 0.332111053 | 0.023597273  | 0.879430326  | 0.036182486   | 1.348459823 |             |         |
| chr11      | 30355     | 37330     | XM 623894                         | 6976   | 6976         |            | 6259           |           | 0.310907263 | 0.031541219 | 0.315907267  | 0.027526882 | 1.14842816   | 0.333759386 | 0.034891165  | 1.258448853  | 0.030729834   | 1.033558633 | XM 623894.1 |         |
| chrUn      | 31223560  | 31238314  | XM 393083                         | 14755  | 14681        |            | 11249          |           | 0.219262993 | 0.012398665 | 0.10334717   | 0.016145514 | 1.345622414  | 0.264556849 | 0.015987853  | 0.915868627  | 0.020543051   | 1.17658084  | XM 393083.3 |         |
| chr3       | 8454319   | 8457277   | XM 393579                         | 2959   | 2959         |            | 2222           |           | 0.270361693 | 0.018016644 | 0.1018270183 | 0.021636241 | 1.184896213  | 0.334834383 | 0.024853141  | 0.888835771  | 0.028016268   | 1.001420923 | XM 393579.3 |         |
| chrUn      | 37285854  | 37288343  | XM 624093                         | 2490   | 2490         |            | 1896           |           | 0.229317269 | 0.012053033 | 0.104067308  | 0.014065172 | 0.506759195  | 0.283227848 | 0.015889831  | 0.793788451  | 0.018538126   | 0.930686526 | XM 624093.1 |         |
| chr5       | 12852449  | 12855805  | XM 625171                         | 3357   | 3357         |            | 2916           |           | 0.265117665 | 0.019070322 | 0.109805298  | 0.01668532  | 0.960796321  | 0.296269296 | 0.022000688  | 1.014413567  | 0.019250602   | 0.887611871 |             |         |
| chr2       | 4512393   | 4517972   | AmelG2 WGA73.2.504733.504733.m    | 5580   | 4653         |            | 4439           |           | 0.342144853 | 0.04257149  | 1.460885465  | 0.026875941 | 0.922276177  | 0.356161298 | 0.04469526   | 1.415155093  | 0.028216704   | 0.893405993 |             |         |
| chrUn      | 301083007 | 301084906 | XM 624147                         | 1900   | 1900         |            | 1107           |           | 0.211052632 | 0.012111638 | 0.190077589  | 0.012638231 | 1.137472267  | 0.307136405 | 0.020909091  | 0.886732577  | 0.019090909   | 0.809625396 | XM 624147.2 |         |
| chrUn      | 181379519 | 181380403 | AmelGUn WGA4017.2.508648.508648.m | 885    | 885          |            | 885            |           | 0.301694915 | 0.012443439 | 0.547221361  | 0.023755656 | 0.106194915  | 0.031694915 | 0.012443439  | 0.547221361  | 0.023755656   | 0.106194915 |             |         |
| chrUn      | 142868995 | 142870239 | AmelGUn WGA3020.2.507810.507810.m | 1345   | 1345         |            | 1345           |           | 0.35464684  | 0.027529762 | 0.875563072  | 0.039434524 | 1.254184941  | 0.35464684  | 0.027529762  | 0.875563072  | 0.039434524   | 1.254184941 |             |         |
| chr4       | 6974385   | 13956298  | XM 396683                         | 6458   | 6458         |            | 5964           |           | 0.271504425 | 0.02407932  | 1.308012906  | 0.020538244 | 1.115658067  | 0.300974817 | 0.027698574  | 1.224712281  | 0.022403259   | 0.99057611  |             |         |
| chr6       | 12891529  | 12897823  | XM 623207                         | 6295   | 6295         |            | 6295           |           | 0.320095314 | 0.04845885  | 0.875243763  | 0.02466629  | 0.661729142  | 0.332615894 | 0.050057204  | 1.829011094  | 0.027500547   | 0.929497441 |             |         |
| chr10      | 8463173   | 8465063   | XM 393411                         | 1891   | 1891         |            | 1330           |           | 0.233738763 | 0.012698413 | 0.939016331  | 0.017989418 | 1.330273135  | 0.304511278 | 0.018154312  | 0.792917577  | 0.02269289    | 0.991146971 | XM 393411.3 |         |
| chr9       | 1483829   | 1485901   | XM 394781                         | 2073   | 2073         |            | 1804           |           | 0.286058852 | 0.019305019 | 0.967463782  | 0.023648649 | 1.185143133  | 0.316518847 | 0.022234575  | 0.91088313   | 0.027237354   | 1.15831835  | XM 394781.3 |         |
| chr9       | 6530777   | 6532107   | XM 624875                         | 1331   | 1331         |            | 1189           |           | 0.282494365 | 0.009774436 | 0.495535994  | 0.020300752 | 1.029190141  | 0.312026913 | 0.010970464  | 0.455241738  | 0.02278481    | 0.945502071 | XM 624875.2 |         |
| chr1       | 18042467  | 18046377  | XM 392116                         | 3911   | 3911         |            | 3911           |           | 0.290718486 | 0.012531969 | 0.599235818  | 0.023529412 | 1.125100891  | 0.302219147 | 0.014252472  | 0.555230015  | 0.026468877   | 1.392111636 |             |         |
| chrUn      | 201928045 | 201931549 | XM 392750                         | 3505   | 3505         |            | 2519           |           | 0.244793153 | 0.008561644 | 0.582905263  | 0.018550228 | 1.262961403  | 0.306073839 | 0.010774142  | 0.468727775  | 0.022745451   | 0.989536413 | XM 392750.3 |         |
| chr15      | 2636055   | 2646458   | XM 392815                         | 3648   | 3648         |            | 3048           |           | 0.250645439 | 0.028073682 | 0.731304482  | 0.018073682 | 1.340893067  | 0.306073839 | 0.013185067  | 0.58085173   | 0.026951151   | 1.02314769  |             |         |
| chr2       | 1395297   | 13956298  | XM 396683                         | 3002   | 3002         |            | 2681           |           | 0.40635976  | 0.06397867  | 0.290657808  | 0.058647118 | 0.106896157  | 0.479205236 | 0.017775701  | 1.162697472  | 0.042699605   | 0.94534813  | XM 396683.3 |         |
| chr11      | 5384540   | 5411151   | AmelG11 WGA355.2.520067.520067.m  | 26612  | 26612        |            | 22931          |           | 0.250601233 | 0.019277742 | 0.229923576  | 0.018901958 | 0.208945458  | 0.280537264 | 0.022265967  | 1.133866001  | 0.021784777   | 1.10936202  |             |         |
| chr3       | 8576381   | 8605009   | AmelG3 WGA115.2.508417.508417.m   | 28629  | 28528        |            | 26073          |           | 0.333567022 | 0.037617445 | 0.352752835  | 0.009296121 | 0.355233383  | 0.909296121 | 0.041043772  | 1.301177679  | 0.029975789   | 0.902598305 |             |         |
| chr1       | 11129460  | 11175548  | XM 397040                         | 46089  | 45989        |            | 36259          |           | 0.239644263 | 0.020158309 | 1.406212362  | 0.015830905 | 1.014039374  | 0.281943793 | 0.02507542   | 1.264067238  | 0.019507015   | 0.990640568 | XM 397040.3 |         |
| chr8       | 6306521   | 6307435   | AmelG8 WGA267.2.503777.503777.m   | 915    | 915          |            | 833            |           | 0.262295082 | 0.010940919 | 0.667446919  | 0.014223195 | 0.867678098  | 0.283313325 | 0.012048193  | 0.631046832  | 0.015662651   | 0.920360882 |             |         |
| chrUn      | 38872772  | 38877400  | XM 396627                         | 4629   | 4629         |            | 4299           |           | 0.245193346 | 0.008604302 | 0.577443561  | 0.013612792 | 0.909473609  | 0.260293091 | 0.009321836  | 0.552698369  | 0.014681892   | 0.870500403 | XM 396627.3 |         |
| chr11      | 6832028   | 6835482   | XM 391897                         | 3455   | 3455         |            | 2955           |           | 0.282778582 | 0.011580776 | 0.593861023  | 0.018529421 | 0.927489636  | 0.013443993 | 0.01356392   | 0.553084426  | 0.020684978   | 0.939335976 | XM 391897.3 |         |
| chr12      | 7428942   | 7454174   | XM 00101611.1                     | 331    | 331          |            | 9164           |           | 0.218632607 | 0.02094375  | 0.510910667  | 0.02531957  | 1.250998361  | 0.36689236  | 0.02544816   | 0.726148761  | 0.023780243   | 0.975438416 |             |         |
| chrUn      | 17052984  | 17054142  | AmelGUn WGA551.2.512504.512504.m  | 1159   | 1159         |            | 1159           |           | 0.515099223 | 0.064766839 | 0.101969136  | 0.088946459 | 0.400376101  | 0.515099223 | 0.064766839  | 0.101969136  | 0.088946459   | 1.400376101 |             |         |
| chr11      | 12247393  | 12271069  | AmelG11 WGA374.2.509550.509550.m  | 23677  | 23557        |            | 23185          |           | 0.436727936 | 0.084737848 | 0.778922939  | 0.034309639 | 0.940612617  | 0.440543455 | 0.086095287  | 1.776318977  | 0.043716554   | 0.901960463 |             |         |
| chrUn      | 2426618   | 2432435   | AmelGUn WGA459.2.506146.506146.m  | 5818   | 5818         |            | 4758           |           | 0.229828434 | 0.011002235 | 0.851586964  | 0.014784253 | 1.144319983  | 0.267129046 | 0.013288336  | 0.762093632  | 0.017928707   | 1.028212567 |             |         |
| chr2       | 2363321   | 2364254   | XM 625152                         | 934    | 934          |            | 756            |           | 0.207553532 | 0.00750268  | 0.480596763  | 0.021436227 | 1.374193227  | 0.30026455  | 0.009320905  | 0.415865185  | 0.025299601   | 1.126776931 |             |         |
| chr14      | 2036780   | 2041016   | AmelG14 WGA410.2.509896.509896.m  | 4237   | 4237         |            | 4237           |           | 0.474392259 | 0.085457979 | 1.52066927   | 0.047686497 | 0.848550255  | 0.474392259 | 0.085457979  | 1.52066927   | 0.047686497   | 0.848550255 |             |         |
| chrUn      | 30641350  | 30646161  | XM 392590                         | 4812   | 4812         |            | 3785           |           | 0.280548628 | 0.027852837 | 0.136713279  | 0.023695697 | 1.222784662  | 0.332100396 | 0.034455341  | 1.270991481  | 0.029154519   | 1.07545433  | XM 392590.3 |         |
| chr7       | 3436823   | 3436823   | AmelGUn WGA224.2.503268.503268.m  | 22623  | 22623        |            | 22623          |           | 0.308143012 | 0.025812983 | 0.525812983  | 0.025812983 | 1.385093067  | 0.308143012 | 0.025812983  | 1.385093067  | 0.025812983   | 1.385093067 |             |         |
| chrUn      | 19062593  | 19063759  | XM 393328                         | 1167   | 1167         |            | 1001           |           | 0.287917738 | 0.015437393 | 0.747042442  | 0.032590051 | 0.757089599  | 0.325674326 | 0.018036072  | 0.681839741  | 0.038076152   | 0.93439452  | XM 393328.3 |         |
| chr2       | 7476343   | 7478660   | AmelG2 WGA77.2.510747.510747.m    | 2318   | 2318         |            | 2188           |           | 0.282571182 | 0.025463962 | 0.191831882  | 0.019853259 | 0.105103439  | 0.296617916 | 0.027014652  | 0.126579696  | 0.010262721   | 0.479536712 |             |         |
| chrUn      | 238489067 | 238489899 | AmelGUn WGA5504.2.508830.508830.m | 833    | 833          |            | 833            |           | 0.332530313 | 0.013221154 | 0.507974154  | 0.030048077 | 1.154486714  | 0.332530313 | 0.013221154  | 0.507974154  | 0.030048077   | 1.154486714 |             |         |
| chrUn      | 114024893 | 114026176 | AmelGUn WGA2274.2.504635.504635.m | 1284   | 1284         |            | 1284           |           | 0.211806854 | 0.014029618 | 0.786895762  | 0.020265004 | 1.136627212  | 0.271806854 | 0.014029618  | 0.786895762  | 0.020265004   | 1.136627212 |             |         |
| chr8       | 9395006   | 9401166   | XM 395760                         | 6161   | 5750         |            | 6161           |           | 0.315478261 | 0.032535033 | 0.316033974  | 0.029053584 | 1.17528522   | 0.340945513 | 0.037580386  | 1.296314586  | 0.033561093   | 1.157671315 | XM 395760.3 |         |
| chr6       | 545872    | 596443    | XM 394655                         | 13772  | 13772        |            | 14923          |           | 0.288701714 | 0.031878585 | 0.530937812  | 0.022220609 | 0.67712294   | 0.309748048 | 0.034357609  | 1.434092364  | 0.034657941</ |             |             |         |

| chromosome | start     | end       | ID               | length            | length without Ns | non-repetitive nr length | gcContent   | cpContent    | cpq/O/E     | gcContent   | nrGcContent | nrCpG/O/E     | nrCpCContent | nrGpC/O/E     | RefSeqID     | version     |             |
|------------|-----------|-----------|------------------|-------------------|-------------------|--------------------------|-------------|--------------|-------------|-------------|-------------|---------------|--------------|---------------|--------------|-------------|-------------|
| chr1       | 2339485   | 2347552   | XM 624967        | 8068              | 8068              | 7281                     | 0.287803669 | 0.032973844  | 1.592401974 | 0.022437089 | 0.083551719 | 0.311495674   | 0.305650406  | 1.50489513    | 0.024934564  | 1.027396233 | XM 624967.2 |
| chr1n      | 239910380 | 239911221 | AmeLGluN WGA5540 | 2.515677.515677.n | 1832              | 1832                     | 0.31058952  | 0.019115238  | 0.082945931 | 1.213301223 | 0.380918728 | 0.024857955   | 0.692478575  | 0.037642055   | 1.048610686  | -           | -           |
| chr13      | 2009588   | 2011472   | XM 393912        | 1885              | 1885              | 1416                     | 0.27679045  | 0.018046709  | 0.975121929 | 0.021762208 | 0.175882326 | 0.022357724   | 0.033170884  | 0.022777778   | 1.033335205  | XM 393912.2 |             |
| chr2       | 4543504   | 4545488   | AmeLG2 WGA73     | 2.515667.505067.m | 1995              | 1995                     | 0.515288221 | 0.09779338   | 1.473364214 | 0.05463992  | 0.823572817 | 0.050266803   | 0.100154083  | 1.480977905   | 0.055983564  | 0.827773784 | -           |
| chr5       | 3998009   | 4041853   | AmeLG5 WGA167    | 2.516114.516114.m | 3945              | 3945                     | 0.25794223  | 0.015754442  | 1.451198663 | 0.051259292 | 1.136314525 | 0.338320299   | 0.033582951  | 1.254721861   | 0.027635619  | 0.967928293 | -           |
| chr7       | 1317077   | 1317077   | XM 391077        | 3237              | 3237              | 1941                     | 0.362287257 | 0.052372761  | 0.950232748 | 0.027327611 | 0.846885495 | 0.038478596   | 0.022028996  | 0.538476185   | 0.022028996  | 0.538476185 | -           |
| chr12      | 8837157   | 8841341   | XM 393863        | 4185              | 4185              | 4005                     | 0.359139785 | 0.02581262   | 1.083158545 | 0.036328872 | 1.127837952 | 0.373283396   | 0.02675      | 0.768797807   | 0.038        | 0.021923987 | XM 393863.2 |
| chr5       | 11667301  | 11668880  | AmeLG5 WGA171    | 2.507265.507265.m | 1580              | 1580                     | 0.324177215 | 0.00966434   | 0.520938383 | 0.00869303  | 0.56281518  | 0.291629956   | 0.099715773  | 0.468924194   | 0.028368794  | 1.364142966 | -           |
| chr1n      | 99537099  | 99539598  | XM 624026        | 2500              | 2500              | 1805                     | 0.2196      | 0.006402561  | 0.513576376 | 0.015206802 | 1.262493892 | 0.28033241    | 0.008356546  | 0.425769585   | 0.021169916  | 1.078616264 | XM 624026.2 |
| chr1n      | 9338699   | 9343320   | XM 624663        | 4352              | 4352              | 3296                     | 0.20703125  | 0.005975638  | 0.569707067 | 0.01218108  | 1.161325945 | 0.35124605825 | 0.05186089   | 0.35124605825 | 0.02507627   | 0.847130591 | XM 624663.2 |
| chr1       | 103699007 | 10370351  | AmeLG1n WGA5007  | 2.505135.505135.m | 3555              | 3555                     | 0.27885134  | 0.013787282  | 0.778653715 | 0.02447946  | 1.382507621 | 0.284494935   | 0.014596366  | 0.755363      | 0.025915996  | 1.341154713 | -           |
| chr3       | 378274    | 3784263   | XM 624282        | 1896              | 1896              | 1562                     | 0.2489451   | 0.066278653  | 1.3003343   | 0.023451628 | 0.368516267 | 0.012234565   | 0.616098885  | 0.012234565   | 0.949155856  | XM 624282.1 |             |
| chr1n      | 234580611 | 234580611 | AmeLGluN WGA4503 | 2.503986.503986.n | 7787              | 7787                     | 0.358669204 | 0.059662093  | 0.975237611 | 0.006104266 | 0.391394062 | 0.006104266   | 0.059590219  | 0.006104266   | 0.059590219  | 0.006104266 | -           |
| chr7       | 7762753   | 7766917   | AmeLG7 WGA241    | 2.505609.505609.m | 4165              | 4165                     | 0.398559424 | 0.069644573  | 1.755866967 | 0.036023055 | 0.908207052 | 0.412013958   | 0.071232783  | 1.702106314   | 0.03743449   | 0.883464184 | -           |
| chr8       | 3114781   | 3126381   | XM 395098        | 11601             | 11601             | 9072                     | 0.304590906 | 0.032586207  | 1.397622855 | 0.029482759 | 1.264515916 | 0.335639791   | 0.369525244  | 1.17312599    | 0.033101922  | 1.15706995  | XM 395098.3 |
| chr5       | 1269700   | 12692887  | XM 393562        | 2188              | 2188              | 1700                     | 0.510588235 | 0.080683157  | 1.244293192 | 0.052414065 | 0.808336453 | 0.051088235   | 0.080683157  | 1.244293192   | 0.052414065  | 0.808336453 | -           |
| chr1n      | 186994441 | 186998040 | XM 392639        | 3600              | 3600              | 2759                     | 0.263055556 | 0.01114198   | 0.649267573 | 0.32031962  | 1.473420314 | 0.325480246   | 0.51477529   | 0.557604422   | 0.0251895    | 1.129148954 | XM 392639.3 |
| chr1n      | 9433545   | 9435682   | XM 393438        | 2138              | 2138              | 1736                     | 0.246024322 | 0.010294806  | 0.694839576 | 0.02105577  | 1.421262769 | 0.286863959   | 0.011272418  | 0.631688057   | 0.026026805  | 1.292089207 | XM 393438.3 |
| chr1       | 1658283   | 1658338   | XM 391077        | 3237              | 3237              | 1941                     | 0.202363388 | 0.015606106  | 0.951889297 | 0.012234565 | 0.368516267 | 0.012234565   | 0.616098885  | 0.012234565   | 0.949155856  | XM 391077.2 |             |
| chr7       | 5738207   | 57385295  | XM 625092        | 2089              | 2089              | 1588                     | 0.214935376 | 0.002873563  | 0.655563766 | 0.042425287 | 2.172292012 | 0.270780856   | 0.339779468  | 0.21384191    | 0.022678481  | 1.817929008 | XM 625092.1 |
| chr10      | 5593874   | 5595349   | XM 624179        | 1476              | 1476              | 880                      | 0.207317073 | 0.004757627  | 0.730104141 | 0.01835085  | 1.079203802 | 0.295454545   | 0.012557078  | 0.61502757    | 0.02739776   | 1.341878335 | XM 624179.2 |
| chr9       | 1287038   | 1288807   | XM 393284        | 1770              | 1770              | 1104                     | 0.225298887 | 0.002826546  | 1.228221722 | 0.016958734 | 1.369203304 | 0.31888405    | 0.004578755  | 0.180160748   | 0.027472527  | 1.08096449  | XM 393284.3 |
| chr11      | 376730    | 377914    | AmeLG11 WGA346   | 2.509210.509210.m | 1185              | 1185                     | 0.39704641  | 0.03045405   | 1.217396296 | 0.023648649 | 0.988863786 | 0.315292096   | 0.030981067  | 1.249959032   | 0.024096386  | 0.927190352 | -           |
| chr3       | 8880285   | 8882823   | XM 393355        | 7999              | 7999              | 6825                     | 0.209661583 | 0.02808002   | 0.981260583 | 0.063611658 | 1.251547929 | 0.33254212    | 0.320390244  | 0.888658784   | 0.031148986  | 1.135178014 | XM 393355.3 |
| chr1       | 22454752  | 22463045  | XM 623045        | 1203              | 1203              | 797                      | 0.239401496 | 0.0176367309 | 1.76367309  | 0.023949599 | 1.646094887 | 0.030778338   | 0.040591202  | 0.034058128   | 0.392220808  | 1.392220808 | -           |
| chr1       | 3939927   | 3970252   | XM 397025        | 3732              | 3732              | 2832                     | 0.732124922 | 0.12106111   | 0.022579921 | 0.018742918 | 0.026114547 | 0.026114547   | 0.026114547  | 0.026114547   | 0.026114547  | 0.026114547 | XM 397092.2 |
| chr4       | 3843469   | 3843704   | XM 392852        | 3573              | 3573              | 2033                     | 0.27335572  | 0.006988808  | 0.550201894 | 0.025195969 | 1.818726819 | 0.314466463   | 0.403958248  | 0.368365496   | 1.421747106  | -           | -           |
| chr10      | 20416945  | 20431022  | AmeLGluN WGA581  | 2.508332.508332.m | 14078             | 13978                    | 0.24137015  | 0.014025045  | 0.960978432 | 0.016887299 | 1.15709648  | 0.287627907   | 0.017265516  | 0.835066424   | 0.020718619  | 1.002077309 | -           |
| chr5       | 9153449   | 9154343   | XM 625035        | 895               | 895               | 750                      | 0.225698324 | 0.00335705   | 0.25616754  | 0.017897092 | 1.414226881 | 0.257142857   | 0.003916449  | 0.382478244   | 0.020887728  | 1.271883969 | XM 625035.1 |
| chr1n      | 95075608  | 95083998  | AmeLGluN WGA1820 | 2.505801.505801.m | 8391              | 7891                     | 0.197440122 | 0.01154772   | 1.146524519 | 0.013309672 | 1.36801221  | 0.272239442   | 0.017456359  | 0.942956116   | 0.020573566  | 1.111341137 | -           |
| chr1n      | 4283521   | 42835782  | XM 392925        | 2862              | 2862              | 2229                     | 0.306778477 | 0.031457532  | 1.381319995 | 0.024816498 | 1.087341329 | 0.374138816   | 0.04009009   | 1.181687514   | 0.031515332  | 0.929491746 | XM 392925.3 |
| chr4       | 4160808   | 4163840   | XM 393840        | 1573              | 1573              | 1313                     | 0.247933884 | 0.010187347  | 0.920992474 | 0.020992474 | 1.020992474 | 0.020992474   | 0.020992474  | 0.020992474   | 0.020992474  | 0.020992474 | XM 393840.3 |
| chr1n      | 175958967 | 179607020 | XM 624359        | 3755              | 3755              | 1754                     | 0.27430331  | 0.016543609  | 0.909684288 | 0.025099829 | 1.38010644  | 0.337779314   | 0.021104493  | 0.803756954   | 0.031884058  | 1.22555379  | -           |
| chr1n      | 192707875 | 192708091 | XM 624317        | 1027              | 1027              | 903                      | 0.298928919 | 0.023466472  | 1.116906752 | 0.028265107 | 1.295611832 | 0.337768034   | 0.027839644  | 1.00197781    | 0.032293987  | 1.16228884  | XM 624317.2 |
| chr1n      | 104860012 | 104863861 | XM 397094        | 3850              | 3850              | 3006                     | 0.257662338 | 0.011691348  | 0.728837379 | 0.022863801 | 1.424401986 | 0.312042582   | 0.0150306    | 0.640502567   | 0.029392118  | 1.225383853 | XM 397094.3 |
| chr1n      | 31966695  | 31968765  | XM 395818        | 2071              | 2071              | 1755                     | 0.284272236 | 0.00961836   | 0.468990971 | 0.02705314  | 1.363547916 | 0.324126524   | 0.011428571  | 0.38141427    | 0.032        | 1.252796117 | XM 395818.2 |
| chr10      | 4256018   | 4258462   | AmeLG10 WGA19    | 2.513714.513714.m | 2445              | 2445                     | 0.261349693 | 0.019230769  | 1.128516928 | 0.026186579 | 1.536703099 | 0.284661446   | 0.021698894  | 1.073659848   | 0.029085873  | 1.439167013 | -           |
| chr10      | 214086134 | 214089011 | AmeLGluN WGA4774 | 2.500806.500806.m | 2878              | 2878                     | 0.23359972  | 0.0061686    | 0.61314318  | 0.014964126 | 1.103625789 | 0.297592004   | 0.009136592  | 0.44555648    | 0.019186843  | 0.912568607 | -           |
| chr1       | 44592028  | 44592028  | AmeLG8 WGA280    | 2.502776.502776.m | 1945              | 1945                     | 0.267352185 | 0.01378133   | 0.920337813 | 0.020337813 | 1.158747319 | 0.30666166    | 0.451335567  | 0.30666166    | 0.451335567  | 0.30666166  | -           |
| chr5       | 11894381  | 11896334  | XM 623071        | 1954              | 1954              | 1367                     | 0.24944115  | 0.012288786  | 0.789699778 | 0.017409114 | 1.118741352 | 0.332845647   | 0.639713049  | 0.420340042   | 0.0487629016 | 1.386592016 | XM 623071.2 |
| chr1n      | 154069620 | 154071205 | AmeLGluN WGA3316 | 2.502766.502766.m | 1586              | 1586                     | 0.208701135 | 0.015772871  | 0.51010226  | 0.020189274 | 1.856141089 | 0.31707371    | 0.026869159  | 0.609401094   | 0.033878505  | 0.948375763 | -           |
| chr1       | 34314440  | 34315404  | XM 623748        | 965               | 965               | 646                      | 0.204145078 | 0.005186722  | 0.468675587 | 0.0093361   | 0.984376057 | 0.283281734   | 0.007800312  | 0.437408628   | 0.014040562  | 0.758733535 | XM 623748.1 |
| chr1       | 22863237  | 22873224  | XM 395220        | 9898              | 9848              | 6995                     | 0.230300569 | 0.0183831    | 1.594103687 | 0.01807407  | 1.368341751 | 0.301288855   | 0.026055158  | 1.153132917   | 0.026207727  | 1.159876384 | XM 395220.3 |
| chr9       | 4310599   | 4314220   | AmeLG9 WGA288    | 2.506787.506787.m | 3262              | 3262                     | 0.46591796  | 0.07890218   | 1.434909125 | 0.045998816 | 0.847387281 | 0.47399937    | 0.080115467  | 1.42713512    | 0.047335544  | 0.847279631 | -           |
| chr1       | 4158808   | 4159073   | XM 395073        | 1454              | 1454              | 1141                     | 0.253077505 | 0.01062853   | 0.920663083 | 0.01062853  | 1.020663083 | 0.01062853    | 0.01062853   | 0.01062853    | 0.01062853   | 0.01062853  | XM 395073.2 |
| chr4       | 25456956  | 25468625  | XM 393596        | 11670             | 11670             | 10534                    | 0.390168809 | 0.01096235   | 0.463146985 | 0.025973691 | 1.25565253  | 0.335769888   | 0.01197832   | 0.482607021   | 0.033270272  | 1.10753405  | XM 393596.3 |
| chr6       | 1799412   | 1805238   | XM 395444        | 5917              | 5867              | 4970                     | 0.26964347  | 0.026598465  | 1.406370113 | 0.018755328 | 1.032242195 | 0.304425352   | 0.031275222  | 0.312066413   | 0.022195319  | 0.959531002 | XM 395444.3 |
| chr1n      | 29211287  | 29215095  | AmeLGluN WGA678  | 2.514351.514351.m | 3809              | 3809                     | 0.258335521 | 0.01680623   | 0.648274169 | 0.019170168 | 1.150062724 | 0.295158287   | 0.019613948  | 0.901291448   | 0.022727273  | 1.044353583 | -           |
| chr1n      | 318410410 | 318414788 | XM 392727        | 4379              | 4379              | 4347                     | 0.304179036 | 0.031749657  | 1.372786954 | 0.020557332 | 0.888858462 | 0.317096966   | 0.03558667   | 0.321728634   | 0.086608981  | XM 392727.3 |             |
| chr14      | 2393602   | 23991148  | XM 623559        | 5557              | 5557              | 5426                     | 0.369803851 | 0.058135349  | 1.70        |             |             |               |              |               |              |             |             |

| chromosome | start     | end       | ID               | lenqth            | valid  | lenqth | Ns     | non-repetitive | nr          | lenqth       | qcContent   | cpaContent   | cpaQ/E      | qpcContent  | apqcQ/E      | nrGcContent | nrCpGContent | nrCpGQ/E | nrGpCContent | nrGpCQ/E     | RefSeqID | version |
|------------|-----------|-----------|------------------|-------------------|--------|--------|--------|----------------|-------------|--------------|-------------|--------------|-------------|-------------|--------------|-------------|--------------|----------|--------------|--------------|----------|---------|
| chr15      | 1408939   | 1410410   | AmelLG15 WGA427  | 2.507229.507229.m | 1472   | 1472   | 1281   | 0.248641304    | 0.01903467  | 1.233927271  | 0.022433719 | 1.454271427  | 0.276346604 | 0.021909233 | 1.150543945  | 0.025821596 | 1.355998221  | -        | 0.025821596  | 1.355998221  | -        | -       |
| chr15      | 1466314   | 1485829   | AmelLG15 WGA427  | 2.508899.508899.m | 19516  | 19303  | 17580  | 0.4014440191   | 0.061136729 | 1.517973892  | 0.038080928 | 0.945517636  | 0.412116041 | 0.064929883 | 1.529204774  | 0.041044351 | 0.96666149   | -        | 0.041044351  | 0.96666149   | -        | -       |
| chr1       | 23352991  | 23367414  | AmelG1 WGA60     | 2.508365.508365.m | 14424  | 14374  | 13981  | 0.374843467    | 0.067214027 | 1.913484124  | 0.0319371   | 0.909202084  | 0.380373364 | 0.060919832 | 1.908161957  | 0.032863177 | 0.908554293  | -        | 0.032863177  | 0.908554293  | -        | -       |
| chr8       | 39692155  | 3100873   | XM 395098        | 2.508365.508365.m | 31619  | 31550  | 29097  | 0.328443225    | 0.049443261 | 1.554368591  | 0.023090899 | 0.880906585  | 0.347424133 | 0.045597166 | 1.5144135273 | 0.025896209 | 0.858118029  | XM       | 395099.3     | -            | -        |         |
| chr11      | 1094189   | 1096305   | AmelG11 WGA349   | 2.519397.519397.m | 2117   | 2117   | 1660   | 0.259801606    | 0.017759924 | 0.76061413   | 0.026465028 | 0.577570048  | 0.31746988  | 0.016353725 | 0.853807339  | 0.033918837 | 1.336044851  | -        | 0.033918837  | 1.336044851  | -        | -       |
| chr5       | 13198341  | 13202376  | AmelG5 WGA175    | 2.523798.523798.m | 4036   | 3808   | 3447   | 0.426995196    | 0.077792378 | 1.70671115   | 0.043626807 | 0.957119612  | 0.42964867  | 0.085273574 | 0.658746562  | 0.04748882  | 1.032934094  | -        | 0.04748882   | 1.032934094  | -        | -       |
| chr4       | 212742    | 234931    | XM 394454        |                   | 22190  | 22190  | 21322  | 0.400901307    | 0.068277074 | 1.699353989  | 0.039388886 | 0.98035339   | 0.41121846  | 0.070556755 | 1.669180514  | 0.040841236 | 0.966192313  | XM       | 394454.2     | -            | -        |         |
| chr1       | 10130289  | 10133845  | AmelG1 WGA26     | 2.503179.503179.m | 3557   | 3557   | 3327   | 0.374754006    | 0.045275591 | 1.296113378  | 0.030371204 | 0.869442515  | 0.398256688 | 0.04817826  | 1.221571064  | 0.032520325 | 0.824560468  | -        | 0.032520325  | 0.824560468  | -        | -       |
| chr1       | 16714659  | 16862567  | XM 624037        |                   | 147909 | 141902 | 136607 | 0.410557991    | 0.069000754 | 1.637503484  | 0.038520899 | 0.941165462  | 0.416340305 | 0.071041775 | 1.639539542  | 0.03965003  | 0.915064308  | XM       | 624037.2     | -            | -        |         |
| chrUn      | 63680159  | 63681326  | XM 624083        |                   | 1168   | 1168   | 613    | 0.181506849    | 0.001713796 | 1.25618591   | 0.014567266 | 0.84946231   | 0.272430669 | 0.003284077 | 0.8105231    | 0.031974614 | 0.538946435  | -        | 0.031974614  | 0.538946435  | -        | -       |
| chrUn      | 13152419  | 131524898 | AmelGUn WGA62724 | 2.508310.508310.m | 780    | 780    | 780    | 0.367948718    | 0.025673941 | 0.807988086  | 0.032092426 | 1.009985107  | 0.367948718 | 0.025673941 | 0.807988086  | 0.032092426 | 1.009985107  | -        | 0.032092426  | 1.009985107  | -        | -       |
| chr5       | 12690100  | 12694558  | XM 623484        |                   | 3859   | 3371   | 3200   | 0.432809255    | 0.07811532  | 1.68232996   | 0.045710893 | 0.981360914  | 0.4521875   | 0.081977472 | 1.612496036  | 0.04818532  | 1.947803014  | -        | 0.04818532   | 1.947803014  | -        | -       |
| chr2       | 6364061   | 6375793   | AmelG2 WGA76     | 2.501228.501228.m | 1783   | 1733   | 10238  | 0.275546071    | 0.023866348 | 1.257487285  | 0.022587794 | 1.190121895  | 0.306114475 | 0.027024381 | 1.153750391  | 0.025563579 | 1.059226821  | -        | 0.025563579  | 1.059226821  | -        | -       |
| chrUn      | 264451535 | 264453049 | AmelGUn WGA6177  | 2.505997.505997.m | 1515   | 1515   | 1515   | 0.388118812    | 0.034346103 | 0.929228563  | 0.054821664 | 1.483191744  | 0.388118812 | 0.034346103 | 0.929228563  | 0.054821664 | 1.483191744  | -        | 0.034346103  | 1.483191744  | -        | -       |
| chr3       | 5028169   | 5030478   | XM 624696        |                   | 2310   | 2310   | 2193   | 0.577922078    | 0.09354699  | 1.122687593  | 0.084885232 | 1.018735038  | 0.580939352 | 0.098173516 | 1.164718771  | 0.080821918 | 0.9588615    | -        | 0.098173516  | 1.164718771  | -        | -       |
| chrUn      | 28583165  | 28584941  | XM 395090        |                   | 1777   | 1777   | 1748   | 0.249295657    | 0.01463964  | 0.940686515  | 0.021396396 | 1.383848753  | 0.296164173 | 0.018544936 | 0.848755409  | 0.027104137 | 1.240487943  | -        | 0.018544936  | 1.240487943  | -        | -       |
| chr8       | 7042816   | 7046016   | XM 395120        |                   | 3201   | 3201   | 2405   | 0.312714777    | 0.0221875   | 0.91103452   | 0.0265625   | 1.089560471  | 0.352641667 | 0.025566107 | 0.825525195  | 0.021044558 | 1.002423427  | XM       | 395120.3     | -            | -        |         |
| chr4       | 9470782   | 9472641   | XM 624304        |                   | 1970   | 1970   | 1763   | 0.26142132     | 0.009649568 | 0.572299799  | 0.017267469 | 1.02411543   | 0.285876347 | 0.010807736 | 0.534670373  | 0.019340159 | 0.956778562  | XM       | 624304.1     | -            | -        |         |
| chrUn      | 141002797 | 141005116 | XM 624271        |                   | 2320   | 2320   | 1418   | 0.213362069    | 0.009486848 | 0.84643453   | 0.017248814 | 1.538971874  | 0.306770099 | 0.014194464 | 0.610453646  | 0.027679205 | 1.190384609  | -        | 0.014194464  | 1.190384609  | -        | -       |
| chr11      | 2909061   | 2912998   | AmelG11 WGA354   | 2.504202.504202.m | 3938   | 3938   | 3284   | 0.26734917     | 0.01498603  | 0.844971695  | 0.024384049 | 1.07486199   | 0.310292326 | 0.018031785 | 0.755697252  | 0.029339853 | 0.92690088   | -        | 0.018031785  | 0.92690088   | -        | -       |
| chr12      | 3611231   | 3621683   | XM 391923        |                   | 10453  | 10453  | 10128  | 0.501004496    | 0.080176043 | 1.282376443  | 0.059797168 | 0.956426345  | 0.499308847 | 0.078861548 | 1.268018619  | 0.059590869 | 0.958164445  | XM       | 391923.3     | -            | -        |         |
| chr8       | 7033779   | 7035474   | XM 396882        |                   | 1696   | 1696   | 1696   | 0.26120283     | 0.016519174 | 0.962017332  | 0.021238938 | 1.278022284  | 0.32176832  | 0.021857923 | 0.868366078  | 0.082103044 | 1.116706752  | -        | 0.021857923  | 1.116706752  | -        | -       |
| chrUn      | 3178290   | 3138654   | AmelGUn WGA701   | 2.509677.509677.m | 10365  | 10133  | 7462   | 0.265469259    | 0.023395854 | 1.340244172  | 0.023297137 | 1.334589134  | 0.333556687 | 0.031220563 | 1.134914968  | 0.03095142  | 1.125131219  | -        | 0.031220563  | 1.134914968  | -        | -       |
| chr3       | 10568175  | 10572750  | XM 623822        |                   | 4576   | 4576   | 4092   | 0.293924825    | 0.014644809 | 0.689741373  | 0.027978142 | 1.17714863   | 0.322580645 | 0.016417545 | 0.641481357  | 0.025516622 | 1.225116622  | XM       | 623822.1     | -            | -        |         |
| chr7       | 3738575   | 3743359   | XM 395174        |                   | 4785   | 4785   | 4555   | 0.279832811    | 0.029264214 | 1.497202475  | 0.02069398  | 1.058736036  | 0.298967605 | 0.031983433 | 1.43524374   | 0.022779567 | 1.022239399  | XM       | 395174.3     | -            | -        |         |
| chrUn      | 235221987 | 235223657 | AmelGUn WGA6983  | 2.505502.505502.m | 671    | 671    | 671    | 0.651266766    | 0.014814881 | 1.500338642  | 0.014814881 | 1.500338642  | 0.651266766 | 0.014814881 | 1.500338642  | 0.651266766 | 1.500338642  | -        | 0.014814881  | 1.500338642  | -        | -       |
| chr2       | 244235    | 2482217   | AmelG2 WGA70     | 2.501559.501559.m | 17983  | 16959  | 13568  | 0.371130373    | 0.060858212 | 1.76861227   | 0.034911836 | 0.914552775  | 0.392535917 | 0.065830116 | 1.709697427  | 0.031773488 | 0.982108279  | -        | 0.031773488  | 0.982108279  | -        | -       |
| chr5       | 11817302  | 11819058  | XM 394855        |                   | 1757   | 1757   | 1599   | 0.286283438    | 0.035876993 | 1.769177277  | 0.019931665 | 0.982876265  | 0.3095684   | 0.039498433 | 1.666330594  | 0.021943574 | 0.925739219  | XM       | 394855.2     | -            | -        |         |
| chr1       | 8949176   | 8955649   | XM 393109        |                   | 6474   | 6474   | 3980   | 0.240191535    | 0.015294299 | 0.61644201   | 0.021319326 | 1.479876764  | 0.344472362 | 0.02451352  | 0.87227265   | 0.03358605  | 1.125711853  | XM       | 393109.3     | -            | -        |         |
| chrUn      | 65717562  | 65721764  | XM 397260        |                   | 4203   | 4203   | 3309   | 0.286937901    | 0.011661114 | 0.569564252  | 0.023560209 | 1.150752264  | 0.308773043 | 0.014554275 | 0.510336509  | 0.027289266 | 0.956880955  | XM       | 397260.3     | -            | -        |         |
| chrUn      | 11492354  | 11494179  | XM 397008        |                   | 1826   | 1826   | 1338   | 0.246440307    | 0.016438356 | 1.087500326  | 0.020273973 | 1.15240402   | 0.38669656  | 0.022556391 | 0.958359683  | 0.027067669 | 1.15003162   | XM       | 397008.1     | -            | -        |         |
| chrUn      | 165139069 | 165140669 | AmelGUn WGA3599  | 2.505307.505307.m | 1601   | 1601   | 797    | 0.199875078    | 0.00875     | 0.876950489  | 0.019375    | 1.941818939  | 0.299874529 | 0.015228426 | 0.67834737   | 0.03125888  | 1.432123688  | -        | 0.015228426  | 1.432123688  | -        | -       |
| chrUn      | 301486512 | 301487690 | AmelGUn WGA7143  | 2.505503.505503.m | 1179   | 1179   | 1179   | 0.377438507    | 0.026315789 | 0.747323633  | 0.036502547 | 1.9348483975 | 0.377438507 | 0.026315789 | 0.747323633  | 0.036502547 | 1.9348483975 | -        | 0.026315789  | 1.9348483975 | -        | -       |
| chr3       | 9251577   | 9253700   | XM 395106        |                   | 2524   | 2524   | 2524   | 0.267160351    | 0.014814881 | 1.500338642  | 0.014814881 | 1.500338642  | 0.267160351 | 0.014814881 | 1.500338642  | 0.267160351 | 1.500338642  | -        | 0.014814881  | 1.500338642  | -        | -       |
| chrUn      | 61296547  | 61301545  | XM 395517        |                   | 4999   | 4999   | 3419   | 0.232168115    | 0.007883566 | 0.593718195  | 0.014352133 | 1.080871587  | 0.301550161 | 0.010875955 | 0.483432996  | 0.019988242 | 0.888471453  | XM       | 395517.3     | -            | -        |         |
| chrUn      | 99204125  | 99205626  | AmelGUn WGA1906  | 2.503464.503464.m | 1502   | 1502   | 607    | 0.193075899    | 0.009933338 | 1.080984369  | 0.027958881 | 0.94791864   | 0.357495881 | 0.021666667 | 0.687247044  | 0.014666667 | 1.021628931  | -        | 0.021666667  | 1.021628931  | -        | -       |
| chrUn      | 19708368  | 19710811  | XM 624723        |                   | 2444   | 2394   | 1550   | 0.246031746    | 0.006270903 | 0.614660899  | 0.015050167 | 0.989951966  | 0.343870968 | 0.009756525 | 0.332312315  | 0.022135417 | 0.753241247  | XM       | 624723.2     | -            | -        |         |
| chrUn      | 4803052   | 4805302   | XM 396972        |                   | 2251   | 2251   | 1627   | 0.212350067    | 0.010666667 | 0.979396768  | 0.013777778 | 1.265054159  | 0.26920713  | 0.013588635 | 0.780076112  | 0.019147622 | 0.95389158   | -        | 0.013588635  | 0.780076112  | -        | -       |
| chr1       | 3216167   | 3213742   | XM 623297        |                   | 6576   | 6526   | 5288   | 0.25789151     | 0.028510116 | 1.71534663   | 0.019619865 | 1.180435397  | 0.300869894 | 0.034371439 | 1.15953417   | 0.023737182 | 1.049402051  | XM       | 623297.2     | -            | -        |         |
| chr14      | 1250197   | 1259558   | AmelG14 WGA409   | 2.517410.517410.m | 9362   | 9362   | 8790   | 0.314355907    | 0.033222946 | 1.7633750185 | 0.025851939 | 0.611181816  | 0.330944255 | 0.03520164  | 1.303966249  | 0.027568922 | 1.02126231   | -        | 0.03520164   | 1.303966249  | -        | -       |
| chrUn      | 5063627   | 50637082  | XM 395082        |                   | 4763   | 4763   | 4763   | 0.285343709    | 0.00935459  | 0.530007145  | 0.015007145 | 1.5007145    | 0.285343709 | 0.00935459  | 0.530007145  | 0.285343709 | 1.5007145    | -        | 0.00935459   | 1.5007145    | -        | -       |
| chrUn      | 16427469  | 16429402  | AmelGUn WGA545   | 2.514173.514173.m | 1934   | 1934   | 1595   | 0.236814891    | 0.007759955 | 0.555288743  | 0.016037248 | 1.147555403  | 0.278369906 | 0.00882167  | 0.456939114  | 0.019533711 | 1.011793753  | -        | 0.00882167   | 1.011793753  | -        | -       |
| chr11      | 9596059   | 9596265   | XM 392696        |                   | 9207   | 9207   | 6736   | 0.2397         |             |              |             |              |             |             |              |             |              |          |              |              |          |         |

| chromosome | start     | end       | ID             | length            | valid length without Ns | non-repetitive nr length | cpqContent  | cpqContent  | cpqQ/E      | qpcContent  | apcqQ/E     | nrGpContent | nrCpContent  | nrCpGQ/E     | nrGpCContent | nrGpCQ/E    | RefSeqID    | version     |
|------------|-----------|-----------|----------------|-------------------|-------------------------|--------------------------|-------------|-------------|-------------|-------------|-------------|-------------|--------------|--------------|--------------|-------------|-------------|-------------|
| chr2       | 11433969  | 11451211  | XM 392249      | 1243              | 1243                    | 816                      | 0.223652454 | 0.017713366 | 1.452886219 | 0.017713366 | 1.452886219 | 0.295343137 | 0.024660912  | 0.024660912  | 0.168062066  | 0.168062066 | XM 392249.3 |             |
| chrUn      | 21660655  | 21664792  | XM 393264      | 1438              | 1438                    | 3605                     | 0.365152247 | 0.037225042 | 1.157123706 | 0.040609137 | 1.218902247 | 0.410540985 | 0.042861119  | 0.042861119  | 0.101774708  | 0.046479265 | 1.103606794 | XM 393264.2 |
| chrUn      | 28236930  | 28248438  | AmelGUn WGA665 | 2.514350.514350.m | 11509                   | 11509                    | 0.389868798 | 0.057872784 | 1.527109093 | 0.037886688 | 0.999729076 | 0.393834995 | 0.058641975  | 0.058641975  | 0.151861368  | 0.037763253 | 0.97932535  | -           |
| chr4       | 18636353  | 18636353  | XM 625217      | 1803              | 1803                    | 1570                     | 0.241264559 | 0.009888901 | 0.715029119 | 0.014428413 | 1.032809584 | 0.27133758  | 0.015508951  | 0.015508951  | 0.6449411    | 0.016249411 | 0.937371156 | XM 625217.1 |
| chr13      | 43474853  | 44165944  | AmelG13 WGA397 | 2.508389.508389.m | 68692                   | 68692                    | 0.045653725 | 0.074798736 | 1.506554643 | 0.045653725 | 1.932421526 | 0.447523756 | 0.077874485  | 0.077874485  | 0.1556628763 | 0.047518705 | 0.94848767  | XM 396680.3 |
| chrUn      | 90219270  | 90221584  | XM 396680      | 2315              | 2315                    | 1545                     | 0.221598272 | 0.009507347 | 0.775997708 | 0.019878997 | 1.622540662 | 0.293581133 | 0.01366298   | 0.01366298   | 0.637874287  | 0.02732596  | 1.27574854  | XM 396680.3 |
| chr2       | 4725689   | 4729136   | XM 394337      | 3448              | 3448                    | 3423                     | 0.567575406 | 0.104438642 | 1.297828282 | 0.08069626  | 0.995001683 | 0.56704645  | 0.104063139  | 0.104063139  | 1.29531191   | 0.080678164 | 1.004230582 | XM 394337.2 |
| chr2       | 22297483  | 22301044  | XM 623332      | 3562              | 3562                    | 2242                     | 0.216170691 | 0.01516428  | 1.313674051 | 0.0098287   | 0.851455403 | 0.298394291 | 0.0122890485 | 0.0122890485 | 1.039390122  | 0.015260323 | 0.692926748 | XM 623332.2 |
| chrUn      | 33548935  | 33550985  | XM 623169      | 2051              | 2051                    | 1043                     | 0.185275475 | 0.006341463 | 0.750929128 | 0.010731707 | 1.27080314  | 0.294343241 | 0.008695652  | 0.008695652  | 0.415804682  | 0.018357488 | 0.877809885 | -           |
| chrUn      | 8069877   | 8076151   | XM 393409      | 2675              | 2675                    | 4809                     | 0.270756972 | 0.014823079 | 0.813633343 | 0.028052279 | 1.539779229 | 0.329590351 | 0.010717764  | 0.010717764  | 0.703483965  | 0.034482759 | 1.25748574  | XM 393409.3 |
| chrUn      | 24931352  | 24933113  | XM 623543      | 1762              | 1762                    | 1001                     | 0.208853575 | 0.005878592 | 0.547941124 | 0.010221465 | 0.986294024 | 0.283716284 | 0.009072581  | 0.009072581  | 0.4765785    | 0.015120968 | 0.794297499 | XM 623543.2 |
| chr10      | 6625940   | 6627354   | XM 623845      | 1435              | 1435                    | 994                      | 0.237630662 | 0.00538801  | 0.40824469  | 0.016039052 | 1.173703484 | 0.310865191 | 0.008080808  | 0.008080808  | 0.352033919  | 0.022222222 | 1.968093278 | XM 623845.1 |
| chr4       | 355732    | 374901    | XM 392303      | 19170             | 19170                   | 17517                    | 0.458581116 | 0.080181541 | 1.534872751 | 0.049551884 | 0.984685175 | 0.058511346 | 0.0159682079 | 0.0159682079 | 0.085611288  | 0.051758085 | 0.961647668 | XM 392303.3 |
| chr1       | 25361430  | 25363318  | AmelG1 WGA64   | 2.506195.506195.m | 1889                    | 1889                     | 0.349391212 | 0.042372881 | 1.395207596 | 0.034957627 | 1.151046267 | 0.369785795 | 0.045172219  | 0.045172219  | 1.327919355  | 0.037267081 | 1.095533468 | -           |
| chr12      | 8723347   | 8725815   | AmelG12 WGA390 | 2.505714.505714.m | 2469                    | 2469                     | 0.317942487 | 0.035656402 | 1.413723809 | 0.029983793 | 1.188813203 | 0.329531052 | 0.037225042  | 0.037225042  | 1.373815699  | 0.030879865 | 1.139642568 | -           |
| chr5       | 5997045   | 6002140   | XM 395754      | 5096              | 5096                    | 4127                     | 0.269819466 | 0.011776251 | 0.651743079 | 0.021589794 | 1.194862311 | 0.320329537 | 0.01459144   | 0.01459144   | 0.574020407  | 0.026750973 | 1.052370745 | XM 395754.3 |
| chr3       | 5058006   | 5062160   | AmelG3 WGA107  | 2.509083.509083.m | 4155                    | 4155                     | 0.368953069 | 0.03562831  | 1.047743051 | 0.035869042 | 1.05822396  | 0.374326311 | 0.03627451   | 0.03627451   | 1.03638496   | 0.035619608 | 1.034387561 | -           |
| chrUn      | 34221974  | 34229521  | XM 623594      | 7548              | 7548                    | 5658                     | 0.244038156 | 0.019610441 | 1.31915534  | 0.017755399 | 1.194370376 | 0.29922234  | 0.025386118  | 0.025386118  | 1.13534235   | 0.023433339 | 1.048080323 | XM 623594.2 |
| chr6       | 2863898   | 2885101   | AmelG6 WGA189  | 2.504762.504762.m | 21204                   | 20788                    | 0.223734847 | 0.016838257 | 1.34557136  | 0.01563524  | 1.24945912  | 0.283380084 | 0.02231807   | 0.02231807   | 1.161530347  | 0.021556886 | 1.073801468 | -           |
| chrUn      | 10433341  | 10435620  | AmelGUn WGA499 | 2.504149.504149.m | 2280                    | 2280                     | 0.238596491 | 0.00394941  | 0.37842436  | 0.014918824 | 0.051893649 | 0.267692308 | 0.004110997  | 0.004110997  | 0.323040614  | 0.017471737 | 0.9794761   | -           |
| chrUn      | 69648379  | 69659130  | XM 394839      | 10752             | 10752                   | 8671                     | 0.268043155 | 0.02688122  | 1.496650676 | 0.022323505 | 1.242893259 | 0.308384269 | 0.032060185  | 0.032060185  | 1.348562201  | 0.026157407 | 1.100270966 | XM 394839.3 |
| chr11      | 2430069   | 2432882   | XM 391863      | 2814              | 2814                    | 2502                     | 0.294953802 | 0.01955208  | 1.071679265 | 0.022751511 | 1.060863145 | 0.324540368 | 0.022052927  | 0.022052927  | 0.849887102  | 0.05661588  | 0.988959537 | XM 391863.3 |
| chr2       | 3122767   | 3293295   | AmelG2 WGA71   | 2.505734.505734.m | 170529                  | 169852                   | 0.45351247  | 0.08391769  | 1.632081375 | 0.045629839 | 0.887463675 | 0.45798879  | 0.086588866  | 0.086588866  | 1.651258528  | 0.047067716 | 0.95786165  | -           |
| chr16      | 2554171   | 2556331   | XM 393555      | 1461              | 1461                    | 1222                     | 0.355920602 | 0.025054795 | 1.68998144  | 0.03561644  | 1.44893617  | 0.062346185 | 0.04196883   | 0.04196883   | 0.595971522  | 0.009791522 | 0.939555.3  | XM 393555.3 |
| chr11      | 11078384  | 11080090  | XM 393775      | 1727              | 1727                    | 1510                     | 0.261146497 | 0.016801854 | 0.995928246 | 0.027354345 | 1.42177865  | 0.289403974 | 0.019281915  | 0.019281915  | 0.929054016  | 0.027260638 | 1.313490161 | XM 393775.3 |
| chr14      | 7037054   | 7040738   | AmelG14 WGA69  | 2.507338.507338.m | 93214                   | 93214                    | 0.223383568 | 0.019175099 | 1.634217407 | 0.012309882 | 1.171754718 | 0.434269436 | 0.017144504  | 0.017144504  | 0.622552504  | 0.015075566 | 0.947145204 | -           |
| chr3       | 7592123   | 7594748   | XM 395683      | 1626              | 1626                    | 1903                     | 0.248286367 | 0.01142857  | 0.757992646 | 0.016471905 | 1.64237131  | 0.35871367  | 0.029871276  | 0.029871276  | 0.033862434  | 0.033725389 | 0.959683.3  | XM 395683.3 |
| chrUn      | 14184105  | 14187315  | AmelGUn WGA526 | 2.503317.503317.m | 3211                    | 3211                     | 0.28340081  | 0.03333333  | 1.680410092 | 0.02211838  | 1.1150325   | 0.304628999 | 0.035823951  | 0.035823951  | 1.561010204  | 0.02423814  | 1.05554023  | -           |
| chr12      | 4306110   | 4308392   | XM 623982      | 2283              | 2283                    | 1628                     | 0.223828296 | 0.009202454 | 0.739044826 | 0.014027787 | 1.126163544 | 0.277027027 | 0.012954966  | 0.012954966  | 0.679321676  | 0.019749091 | 1.05315684  | XM 623982.2 |
| chrUn      | 39154227  | 39155624  | XM 397424      | 1398              | 1398                    | 1094                     | 0.221745351 | 0.005726557 | 1.045025241 | 0.010021475 | 1.288421598 | 0.26142596  | 0.00733945   | 0.00733945   | 0.433141885  | 0.012844037 | 0.757998299 | XM 397424.3 |
| chrUn      | 102011593 | 102013948 | XM 395852      | 2356              | 2356                    | 1634                     | 0.219864177 | 0.00552017  | 0.46527208  | 0.015286624 | 1.288447754 | 0.286413709 | 0.006769231  | 0.006769231  | 0.339014637  | 0.019692308 | 0.98624397  | XM 395852.3 |
| chr1       | 430747    | 434371    | XM 625286      | 3625              | 3625                    | 2224                     | 0.478068966 | 0.059326711 | 1.168779616 | 0.068984547 | 1.359046118 | 0.389838129 | 0.052845528  | 0.052845528  | 1.041699898  | 0.04561879  | 1.210247596 | XM 625286.2 |
| chr8       | 4478310   | 4492744   | XM 396287      | 14435             | 14435                   | 11801                    | 0.284101143 | 0.034155466 | 1.693405079 | 0.037070528 | 1.143821128 | 0.041393965 | 0.011581186  | 0.011581186  | 0.027624309  | 0.008488471 | 0.9628748   | -           |
| chr1       | 5878093   | 5888264   | XM 394846      | 1451              | 1451                    | 1598                     | 0.20228385  | 0.06104595  | 1.571951383 | 0.028965326 | 1.289924328 | 0.008191356 | 0.008191356  | 0.008191356  | 0.420849576  | 0.02402851  | 1.343725389 | XM 394846.2 |
| chr11      | 7171569   | 7180241   | XM 623051      | 8673              | 8673                    | 8025                     | 0.306237749 | 0.037938192 | 1.618159726 | 0.025023063 | 1.06729684  | 0.325732087 | 0.041063405  | 0.041063405  | 1.548104312  | 0.026959561 | 1.016384594 | XM 623051.2 |
| chr9       | 5514008   | 5514728   | AmelG9 WGA292  | 2.503281.503281.m | 729                     | 729                      | 0.260631001 | 0.005494055 | 0.626474644 | 0.01510989  | 0.897810276 | 0.285488959 | 0.006329114  | 0.006329114  | 0.313380798  | 0.05822785  | 0.847531994 | -           |
| chr5       | 5746734   | 5947968   | XM 394553      | 201235            | 195664                  | 185094                   | 0.404531337 | 0.065522828 | 1.603009066 | 0.037923509 | 0.927794639 | 0.409824197 | 0.067993097  | 0.067993097  | 1.619310983  | 0.039425069 | 0.938940126 | XM 394553.3 |
| chr15      | 4245697   | 4249745   | XM 395626      | 4049              | 4049                    | 3232                     | 0.24542537  | 0.019268775 | 1.261307926 | 0.019762846 | 1.314337719 | 0.292079208 | 0.024231128  | 0.024231128  | 1.136161662  | 0.032609817 | 1.010729312 | -           |
| chr4       | 8298816   | 8300832   | AmelG4 WGA143  | 2.501245.501245.m | 2017                    | 2017                     | 0.189390183 | 0.002480159 | 0.739436691 | 0.007396509 | 0.893990411 | 0.246624023 | 0.003586801  | 0.003586801  | 0.237780663  | 0.010760402 | 0.71334199  | -           |
| chrUn      | 30250973  | 30252663  | XM 396842      | 1691              | 1691                    | 1207                     | 0.19633353  | 0.008284024 | 0.859756398 | 0.010059172 | 1.034989912 | 0.251864126 | 0.011676397  | 0.011676397  | 0.737066047  | 0.014178482 | 0.808008771 | XM 396842.3 |
| chrUn      | 30351514  | 30351514  | AmelGUn WGA689 | 2.507338.507338.m | 596                     | 596                      | 0.200986436 | 0.012317407 | 1.612834486 | 0.012317407 | 1.612834486 | 0.251864126 | 0.011676397  | 0.011676397  | 0.737066047  | 0.014178482 | 0.808008771 | -           |
| chr15      | 4240195   | 4242468   | XM 624350      | 2274              | 2274                    | 1520                     | 0.212840089 | 0.00791905  | 0.6995378   | 0.012318522 | 1.088136557 | 0.297368421 | 0.011928429  | 0.011928429  | 0.540095309  | 0.01855335  | 1.840148259 | XM 624350.2 |
| chr1       | 5289282   | 5298898   | XM 623339      | 9617              | 9567                    | 7411                     | 0.252632981 | 0.023836905 | 1.494371852 | 0.022582331 | 1.415720702 | 0.300904062 | 0.030208616  | 0.030208616  | 1.336693929  | 0.028718504 | 1.270345698 | XM 623339.2 |
| chr1       | 17212811  | 17218692  | AmelG1 WGA48   | 2.508194.508194.m | 5882                    | 5882                     | 0.379802788 | 0.055942867 | 1.554514264 | 0.041319503 | 1.14816707  | 0.389296957 | 0.057587957  | 0.057587957  | 1.523276235  | 0.04253457  | 1.125094605 | -           |
| chr8       | 7708407   | 77083138  | AmelG8 WGA274  | 2.513964.513964.m | 1972                    | 1972                     | 0.350912779 | 0.03957382  | 1.295229932 | 0.02739726  | 0.896697645 | 0.361300472 | 0.040966387  | 0.040966387  | 1.263959418  | 0.028361345 | 0.875048828 | -           |
| chrUn      | 25929972  | 25936334  | XM 624845      | 6363              | 5074                    | 2832                     | 0.210681908 | 0.013803983 | 1.249174426 | 0.01636758  | 1.418136962 | 0.309322034 | 0.02416489   | 0.02416489   | 1.014998269  | 0.027007818 |             |             |

| chromosome | start     | end       | ID              | length            | valid length | without Ns | non-repetitive | nr length | qContent    | cpaContent  | cpqo/E      | qpcContent  | apcq/E      | nrGContent  | nrCpGContent | nrCpGGO/E   | nrGpCContent | nrGpCContent | RefSeqID | Version  |
|------------|-----------|-----------|-----------------|-------------------|--------------|------------|----------------|-----------|-------------|-------------|-------------|-------------|-------------|-------------|--------------|-------------|--------------|--------------|----------|----------|
| chr2       | 6279785   | 6280903   | AmelG2 WGA76    | 2.500393.500393.m | 1119         | 925        | 692            |           | 0.243243243 | 0.004333694 | 0.2931239   | 0.018418202 | 1.245776575 | 0.300578035 | 0.005822416  | 0.258611626 | 0.024745269  | 1.09718691   | -        |          |
| chr15      | 455059    | 462275    | XM 394059       |                   | 7217         | 7217       | 6884           |           | 0.493972565 | 0.089800443 | 1.474288062 | 0.051552106 | 0.845317221 | 0.494479954 | 0.009195423  | 1.505811948 | 0.025378874  | 0.857740983  | XM       | 394059.2 |
| chr5       | 9968455   | 9974513   | XM 623258       |                   | 6059         | 6059       | 5741           |           | 0.394289487 | 0.038791668 | 1.001776931 | 0.036150545 | 0.933570842 | 0.409684724 | 0.004999606  | 0.98137931  | 0.03820656   | 0.94561995   | XM       | 623608.2 |
| chr15      | 5623397   | 5633782   | XM 392486       |                   | 7389         | 7389       | 7059           |           | 0.288218459 | 0.025521765 | 1.23038923  | 0.022659511 | 1.002394189 | 0.318605905 | 0.029110093  | 1.146386593 | 0.025781679  | 1.01339973   | XM       | 623608.2 |
| chr8       | 1858459   | 1870370   | XM 392486       |                   | 11912        | 11912      | 10922          |           | 0.336971122 | 0.04122399  | 1.452138366 | 0.02852562  | 1.590765502 | 0.356894362 | 0.044746011  | 0.405195739 | 0.030533651  | 1.958673322  | XM       | 392486.3 |
| chrUn      | 315421238 | 315423354 | XM 392814       |                   | 2117         | 2117       | 1846           |           | 0.302314596 | 0.010869565 | 0.520300087 | 0.034026465 | 1.573765795 | 0.33531961  | 0.012479653  | 0.472051419 | 0.037981552  | 1.436678231  | XM       | 392814.2 |
| chr1       | 21178440  | 21180810  | AmelG1 WGA55    | 2.506527.506527.m | 2371         | 2371       | 2327           |           | 0.53268663  | 0.099578059 | 1.42632366  | 0.069198312 | 0.991174069 | 0.536742587 | 0.101505376  | 1.43691122  | 0.070537634  | 0.998531526  | -        |          |
| chrUn      | 28588070  | 28589597  | XM 397185       |                   | 1528         | 1528       | 787            |           | 0.185209424 | 0.007858546 | 0.930615128 | 0.013097577 | 1.551025213 | 0.285895807 | 0.014120668  | 0.699672298 | 0.023106547  | 1.144918306  | XM       | 397185.1 |
| chr9       | 4250703   | 4251953   | AmelG9 WGA288   | 2.505618.505618.m | 1251         | 1251       | 901            |           | 0.20383693  | 0.004       | 0.379460571 | 0.016       | 1.589842286 | 0.265260821 | 0.005586592  | 0.329258103 | 0.022346369  | 1.317032414  | XM       | 397185.1 |
| chr5       | 13051909  | 13065754  | XM 393584       |                   | 4846         | 4846       | 4497           |           | 0.304787454 | 0.03880289  | 1.679275029 | 0.026625387 | 1.147945632 | 0.318212141 | 0.041685241  | 1.652509035 | 0.028532314  | 1.131129179  | XM       | 393584.3 |
| chrUn      | 230694739 | 230694752 | AmelGUn WGA5302 | 2.509997.509997.m | 414          | 414        | 368            |           | 0.338164251 | 0.00958523  | 0.54087081  | 0.03197046  | 1.088174163 | 0.373563218 | 0.011594203  | 0.534896894 | 0.023188406  | 1.06979789   | XM       | 624370.2 |
| chrUn      | 2991077   | 3031372   | XM 624619       |                   | 40296        | 40296      | 36471          |           | 0.344823308 | 0.04733337  | 1.592152818 | 0.031194937 | 1.050701127 | 0.364097502 | 0.051475032  | 1.554352311 | 0.034225128  | 1.033470106  | XM       | 624619.2 |
| chrUn      | 188246794 | 188247562 | AmelGUn WGA4197 | 2.503305.503305.m | 769          | 769        | 769            |           | 0.451235371 | 0.040364583 | 0.973129996 | 0.084635417 | 1.663014508 | 0.451235371 | 0.034036458  | 0.793129996 | 0.084635417  | 1.663014508  | -        |          |
| chr4       | 10434800  | 10485978  | XM 392707       |                   | 51179        | 50996      | 39373          |           | 0.248117499 | 0.026512923 | 1.723351025 | 0.018139389 | 1.179067824 | 0.297259543 | 0.033888365  | 1.534561181 | 0.023076727  | 1.044979585  | XM       | 392707.3 |
| chr1       | 22956336  | 22957433  | XM 395017       |                   | 1098         | 1098       | 672            |           | 0.204007286 | 0.002734731 | 0.266424463 | 0.018231541 | 1.776163089 | 0.28125     | 0.004497751  | 0.233727955 | 0.028485757  | 1.480289084  | XM       | 395017.3 |
| chrUn      | 57723789  | 57731602  | XM 393601       |                   | 7814         | 7395       | 5624           |           | 0.2607167   | 0.01487894  | 0.879332452 | 0.022588935 | 1.33498654  | 0.319523471 | 0.019450393  | 0.765293054 | 0.028907923  | 1.137408025  | XM       | 393601.3 |
| chrUn      | 18454475  | 18461397  | AmelGUn WGA564  | 2.510501.510501.m | 6923         | 6923       | 5606           |           | 0.256102846 | 0.022247905 | 1.358421945 | 0.017047096 | 1.040868763 | 0.295041027 | 0.02684804   | 1.234734745 | 0.020583497  | 0.946629971  | -        |          |
| chrUn      | 53814208  | 53820547  | XM 624379       |                   | 6340         | 6340       | 4748           |           | 0.247160883 | 0.008045433 | 0.534415759 | 0.017510648 | 1.163140181 | 0.310235889 | 0.010372566  | 0.43830009  | 0.022861981  | 0.966049178  | XM       | 624379.2 |
| chr11      | 1928911   | 1935682   | XM 624370       |                   | 6772         | 6772       | 5064           |           | 0.27259304  | 0.028799291 | 1.576942445 | 0.025845518 | 1.413204758 | 0.316745656 | 0.032764098  | 1.320770775 | 0.031969817  | 1.28875209   | XM       | 624370.2 |
| chr1       | 5961266   | 5971252   | XM 624767       |                   | 9987         | 9574       | 8470           |           | 0.312304157 | 0.039803594 | 1.637206686 | 0.017370134 | 0.730512169 | 0.334120425 | 0.045099432  | 1.623568773 | 0.019767992  | 0.711643006  | -        |          |
| chr11      | 6829729   | 6830904   | XM 393787       |                   | 1176         | 1176       | 1077           |           | 0.283163265 | 0.011914894 | 0.608673608 | 0.022978723 | 1.17387055  | 0.30176416  | 0.013011152  | 0.587146476 | 0.025092937  | 1.132353917  | XM       | 393787.3 |
| chrUn      | 40015571  | 40022197  | XM 392451       |                   | 6627         | 6627       | 5092           |           | 0.311515351 | 0.017808633 | 0.736113834 | 0.032749774 | 1.353700864 | 0.380204242 | 0.02285264   | 0.632683975 | 0.02356186   | 1.172647023  | XM       | 392451.3 |
| chr3       | 601442    | 602197    | XM 624261       |                   | 756          | 756        | 662            |           | 0.255291005 | 0.00794702  | 0.506355401 | 0.022516556 | 1.434673636 | 0.287009063 | 0.009140704  | 0.460535774 | 0.025796662  | 1.304851358  | XM       | 624261.1 |
| chrUn      | 80179650  | 80181748  | AmelGUn WGA1527 | 2.507300.507300.m | 2099         | 2099       | 1658           |           | 0.278704145 | 0.00726311  | 0.927870413 | 0.020972355 | 1.080146135 | 0.324487335 | 0.00968523   | 0.368019195 | 0.026029056  | 0.908051587  | -        |          |
| chr5       | 8933965   | 8937435   | XM 624899       |                   | 3471         | 3471       | 3380           |           | 0.432152118 | 0.072622478 | 1.55885096  | 0.045821326 | 0.983560725 | 0.442018134 | 0.074644455  | 1.531223864 | 0.047097156  | 0.966129343  | XM       | 624899.2 |
| chrUn      | 4011494   | 4022093   | XM 624370       |                   | 1319         | 1114       | 839            |           | 0.194310683 | 0.00575564  | 1.371818126 | 0.013181812 | 1.418181812 | 0.265187055 | 0.020124521  | 0.464261752 | 0.010081695  | 0.966129343  | XM       | 624899.2 |
| chr14      | 198165    | 2021443   | XM 394050       |                   | 3471         | 3471       | 3454           |           | 0.266649912 | 0.01860231  | 0.91324168  | 0.021870827 | 1.283043279 | 0.300231616 | 0.021492884  | 0.99828929  | 0.025268661  | 1.173664435  | XM       | 394050.3 |
| chr14      | 1682021   | 1711675   | XM 397501       |                   | 29655        | 29646      | 27949          |           | 0.416110099 | 0.066468723 | 1.535635773 | 0.03589858  | 0.829399219 | 0.42666357  | 0.069820789  | 1.548790539 | 0.037956899  | 0.841975966  | XM       | 397501.3 |
| chr14      | 3778494   | 3780049   | XM 393473       |                   | 1556         | 1556       | 1225           |           | 0.219794344 | 0.01221865  | 1.015168053 | 0.01607717  | 1.335747438 | 0.266994267 | 0.015650741  | 0.880808659 | 0.020593081  | 1.159053498  | XM       | 393473.3 |
| chrUn      | 10199336  | 10200815  | XM 623586       |                   | 1480         | 1480       | 1152           |           | 0.234234232 | 0.012846518 | 0.977049057 | 0.01352265  | 1.028472692 | 0.276909722 | 0.016550523  | 0.886013102 | 0.017421603  | 0.932645371  | XM       | 623586.2 |
| chrUn      | 76333635  | 76338002  | AmelGUn WGA1449 | 2.506631.506631.m | 4368         | 4368       | 3072           |           | 0.249542125 | 0.020151134 | 1.299770183 | 0.018777193 | 1.121149489 | 0.321940104 | 0.028150573  | 1.094520956 | 0.0467725    | 1.094520956  | XM       | 623370.2 |
| chr3       | 1025758   | 1028437   | AmelG3 WGA99    | 2.508587.508587.m | 2680         | 2680       | 2464           |           | 0.304850746 | 0.03210153  | 1.382041792 | 0.020350349 | 0.883863937 | 0.321834416 | 0.034973566  | 1.3506792   | 0.022366816  | 0.863806465  | -        |          |
| chr3       | 5350779   | 5373903   | XM 623197       |                   | 23125        | 23125      | 18306          |           | 0.282448649 | 0.02828304  | 1.420232917 | 0.024303754 | 1.22044848  | 0.331913034 | 0.035085796  | 0.29713283  | 0.1079510292 | 0.93510292   | XM       | 623197.2 |
| chrUn      | 3946199   | 3946999   | AmelG6 WGA199   | 2.501926.501926.m | 4339         | 4339       | 3946           |           | 0.369740989 | 0.02975564  | 0.930832748 | 0.02398531  | 0.913242203 | 0.388811472 | 0.062729849  | 1.55913604  | 0.036273046  | 1.02474678   | -        |          |
| chr15      | 2072971   | 2074363   | AmelG15 WGA430  | 2.517583.517583.m | 1393         | 1393       | 1225           |           | 0.221105528 | 0.006465117 | 0.54332885  | 0.011494523 | 0.965917955 | 0.342365306 | 0.007377049  | 0.513078626 | 0.013144754  | 0.912139779  | -        |          |
| chr1       | 11045130  | 11046884  | XM 624118       |                   | 1755         | 1755       | 1335           |           | 0.24045584  | 0.006841505 | 0.501463717 | 0.020524515 | 1.30439115  | 0.292134831 | 0.009042954  | 0.441501719 | 0.026375283  | 1.827173347  | XM       | 624118.2 |
| chr11      | 9926793   | 9930719   | XM 395499       |                   | 3927         | 3927       | 2344           |           | 0.229182582 | 0.010952624 | 0.849190603 | 0.017829852 | 1.382403307 | 0.326791809 | 0.018033491  | 0.688141525 | 0.027908794  | 1.064980932  | XM       | 395499.3 |
| chrUn      | 52126171  | 52126756  | AmelGUn WGA1007 | 2.501447.501447.m | 586          | 586        | 586            |           | 0.336177474 | 0.018803419 | 0.676410937 | 0.022222222 | 0.93994744  | 0.336177474 | 0.018803491  | 0.676410937 | 0.022222222  | 0.93994744   | -        |          |
| chr9       | 1370200   | 1397719   | XM 392524       |                   | 26372        | 26372      | 23279          |           | 0.335444238 | 0.049643507 | 1.765576003 | 0.028367718 | 1.008900573 | 0.358985195 | 0.054687164  | 1.690880546 | 0.030917625  | 0.955498878  | XM       | 392524.3 |
| chrUn      | 23014218  | 23017789  | XM 393371       |                   | 3572         | 3572       | 3275           |           | 0.299552072 | 0.029403528 | 1.312059445 | 0.022402688 | 0.999664339 | 0.321526718 | 0.032139578  | 1.524059199 | 0.028181206  | 0.936785912  | XM       | 393371.3 |
| chr15      | 17187152  | 17190539  | AmelG15 WGA48   | 2.506524.506524.m | 1988         | 1988       | 1788           |           | 0.412192394 | 0.005920136 | 0.989094999 | 0.013820816 | 1.418657565 | 0.026312782 | 0.026312782  | 0.026312782 | 0.026312782  | 0.026312782  | XM       | 393371.3 |
| chr4       | 5424620   | 5434333   | AmelG4 WGA138   | 2.501744.501744.m | 9713         | 9663       | 5273           |           | 0.171271862 | 0.00405508  | 0.618770927 | 0.02183511  | 1.784362672 | 0.2507111   | 0.007840887  | 0.510188408 | 0.020462804  | 0.931467309  | -        |          |
| chr8       | 1564232   | 1566859   | AmelG8 WGA254   | 2.503440.503440.m | 4628         | 4628       | 3585           |           | 0.206568127 | 0.006051437 | 0.54330369  | 0.015993084 | 1.517873118 | 0.25355645  | 0.007856341  | 0.495930573 | 0.020763187  | 1.310676357  | -        |          |
| chr13      | 1136930   | 1138375   | XM 001011614.1  |                   | 1446         | 1446       | 1392           |           | 0.491701245 | 0.076124567 | 1.259755252 | 0.049134948 | 0.813414754 | 0.501436782 | 0.079193665  | 1.259858068 | 0.051115911  | 0.81381117   | -        |          |
| chr11      | 5369926   | 5373015   | XM 397108       |                   | 3090         | 3090       | 2240           |           | 0.25210356  | 0.011977986 | 0.76053021  | 0.02007122  | 1.274401974 | 0.321428571 | 0.015246637  | 0.59694064  | 0.02735426   | 1.070981737  | XM       | 397108.2 |
| chrUn      | 26232498  | 26233635  | AmelGUn WGA644  | 2.504663.504663.m | 1138         | 1138       | 870            |           | 0.24304909  | 0.012313105 | 0.831300819 | 0.01055409  | 0.712543559 | 0.291954023 | 0.013872832  | 0.652479141 | 0.013872832  | 0.652479141  | -        |          |
| chr4       | 8940314   |           |                 |                   |              |            |                |           |             |             |             |             |             |             |              |             |              |              |          |          |

| chromosome | start     | end       | ID              | lenqth | valid  | lenqth | without | Ns | non-repetitive | nr | lenqth | qcContent    | cpqContent  | cpqQ/E       | apqcContent  | nrGCContent  | nrCpGContent | nrCpGQ/E    | nrGpCContent | nrGpCQ/E    | RefSeqID     | version     |
|------------|-----------|-----------|-----------------|--------|--------|--------|---------|----|----------------|----|--------|--------------|-------------|--------------|--------------|--------------|--------------|-------------|--------------|-------------|--------------|-------------|
| chr16      | 4332633   | 4352327   | XM 624329       | 19695  | 19645  |        |         |    | 14857          |    |        | 0.260210085  | 0.012930815 | 0.776481525  | 0.021992567  | 1.320629995  | 0.017033933  | 0.651200214 | 0.028727863  | 1.098254328 | -            |             |
| chrUn      | 32354261  | 32359785  | AmelGUn WGA712  | 5525   | 5525   |        |         |    | 4276           |    |        | 0.239457014  | 0.009051412 | 0.648551988  | 0.017740768  | 1.27161896   | 0.01150775   | 0.551272607 | 0.022780648  | 1.091294752 | -            |             |
| chrUn      | 29462140  | 29476039  | XM 396487       | 13900  | 13900  |        |         |    | 11918          |    |        | 0.280863309  | 0.016547953 | 0.83965194   | 0.022591553  | 1.473640731  | 0.019340883  | 0.753405339 | 0.026176248  | 1.027671318 | XM 396487.3  |             |
| chr3       | 8498904   | 8501652   | AmelG3 WGA115   | 2749   | 2749   |        |         |    | 2431           |    |        | 0.280829393  | 0.007641921 | 0.382604755  | 0.027292576  | 1.384302696  | 0.308925368  | 0.026907322 | 0.026907322  | 1.24443113  | -            |             |
| chrUn      | 281090880 | 281099473 | AmelGUn WGA6609 | 8594   | 8594   |        |         |    | 7064           |    |        | 0.312454516  | 0.011051005 | 0.8790005629 | 0.014663089  | 1.132734437  | 0.263448071  | 0.01361509  | 0.01788869   | 0.04762555  | -            |             |
| chr9       | 994262    | 10104945  | AmelG9 WGA284   | 16124  | 16124  |        |         |    | 14736          |    |        | 0.292615605  | 0.042205694 | 1.725984182  | 0.022269091  | 0.931906082  | 0.331636884  | 0.045844103 | 0.166956249  | 0.024146375 | 0.08935658   | -           |
| chr10      | 430630    | 432254    | AmelG10 WGA306  | 1625   | 1625   |        |         |    | 1442           |    |        | 0.292307692  | 0.02955665  | 1.384714171  | 0.022167488  | 1.038535629  | 0.316920943  | 0.032638889 | 0.129990763  | 0.025       | 0.995673243  | -           |
| chrUn      | 2335757   | 2340082   | XM 392754       | 4326   | 4326   |        |         |    | 3989           |    |        | 0.307674526  | 0.025895954 | 1.106296     | 0.029364162  | 1.254460643  | 0.330157934  | 0.02812657  | 0.104440919  | 0.031893521 | 1.184321399  | XM 392754.3 |
| chrUn      | 4409655   | 4411346   | XM 396642       | 1692   | 1692   |        |         |    | 1346           |    |        | 0.254728132  | 0.008279125 | 0.514589845  | 0.01951508   | 1.212961778  | 0.307578009  | 0.010463378 | 0.447460632  | 0.024663677 | 1.054728632  | XM 396642.3 |
| chrUn      | 92884854  | 92887635  | XM 393381       | 2782   | 2782   |        |         |    | 2459           |    |        | 0.268152408  | 0.017259978 | 0.974326185  | 0.024451636  | 1.380295429  | 0.295648638  | 0.019575856 | 0.907667811  | 0.027324633 | 0.1266952986 | XM 393381.3 |
| chr7       | 2133065   | 2135047   | XM 393066       | 1983   | 1983   |        |         |    | 1103           |    |        | 0.215834574  | 0.012613522 | 1.135534124  | 0.016649849  | 1.498901448  | 0.332728921  | 0.022914757 | 0.882168841  | 0.028414299 | 0.109389363  | XM 393066.3 |
| chrUn      | 47423843  | 47429313  | XM 624278       | 5471   | 5471   |        |         |    | 3508           |    |        | 0.246755621  | 0.01311152  | 0.902769712  | 0.021937843  | 1.745913539  | 0.341790194  | 0.021453089 | 0.7369932    | 0.03375286  | 1.158916264  | XM 624278.2 |
| chr10      | 3106879   | 3109429   | XM 623181       | 2551   | 2551   |        |         |    | 1918           |    |        | 0.259506076  | 0.013333333 | 0.810453928  | 0.0218823529 | 1.344170322  | 0.325860271  | 0.017819706 | 0.691539359  | 0.024633124 | 0.959591466  | XM 623181.2 |
| chr10      | 2309355   | 2323871   | XM 623239       | 14517  | 14517  |        |         |    | 13190          |    |        | 0.331680099  | 0.040782585 | 1.482915174  | 0.029346928  | 1.067097744  | 0.348597422  | 0.044528875 | 1.466149889  | 0.032066869 | 1.055828077  | -           |
| chr6       | 10665006  | 10667930  | AmelG6 WGA203   | 2925   | 2875   |        |         |    | 2113           |    |        | 0.261565217  | 0.017403411 | 1.024923547  | 0.01566307   | 0.922431192  | 0.322763843  | 0.021863118 | 0.844373262  | 0.020912548 | 0.807661381  | -           |
| chrUn      | 53358147  | 53364341  | XM 624023       | 6195   | 5878   |        |         |    | 3916           |    |        | 0.203980946  | 0.013955071 | 1.344824857  | 0.013104152  | 1.262823341  | 0.272727273  | 0.020308483 | 1.095375652  | 0.019794344 | 1.067644623  | XM 624023.1 |
| chr7       | 2043154   | 2049861   | XM 394673       | 6708   | 6708   |        |         |    | 6175           |    |        | 0.366428145  | 0.053526167 | 1.594655542  | 0.031310571  | 0.932080663  | 0.391902834  | 0.058222511 | 0.151663071  | 0.034057736 | 0.1067615596 | XM 394673.3 |
| chr5       | 11895402  | 11922706  | XM 394598       | 27305  | 27255  |        |         |    | 23129          |    |        | 0.371197945  | 0.058158735 | 1.689714975  | 0.032179943  | 0.934940084  | 0.400233473  | 0.065713667 | 1.642925795  | 0.035867446 | 0.896732075  | XM 394598.3 |
| chr9       | 566379    | 572206    | AmelG9 WGA286   | 5828   | 5828   |        |         |    | 5267           |    |        | 0.410775566  | 0.053029003 | 1.257508633  | 0.039986271  | 0.948218484  | 0.406113537  | 0.052711703 | 1.281935778  | 0.040723121 | 0.990421031  | -           |
| chr6       | 2514824   | 2515921   | AmelG6 WGA184   | 1098   | 1098   |        |         |    | 1036           |    |        | 0.273224044  | 0.006381039 | 0.344113723  | 0.02461258   | 0.92759787   | 0.285714286  | 0.06769826  | 0.333564113  | 0.026112186 | 0.88660437   | -           |
| chr5       | 4947856   | 4956091   | AmelG5 WGA159   | 8236   | 8236   |        |         |    | 7366           |    |        | 0.306702283  | 0.034608379 | 1.47166006   | 0.023679417  | 1.006925304  | 0.332745045  | 0.038618439 | 1.395195461  | 0.026380201 | 0.953056504  | -           |
| chrUn      | 63952880  | 63972034  | XM 395558       | 19155  | 19155  |        |         |    | 14533          |    |        | 0.262281389  | 0.023702621 | 1.386867805  | 0.023337162  | 1.367276319  | 0.317415537  | 0.030673575 | 1.230606769  | 0.02935967  | 1.25376948   | -           |
| chr7       | 662118    | 682769    | AmelG7 WGA215   | 20652  | 20279  |        |         |    | 18993          |    |        | 0.370925588  | 0.053462221 | 1.554305281  | 0.03953837   | 1.4524285003 | 0.388801414  | 0.057049457 | 1.509037175  | 0.038279026 | 1.012533261  | -           |
| chrUn      | 14913496  | 14915781  | XM 624986       | 2286   | 2286   |        |         |    | 1585           |    |        | 0.2432119598 | 0.010065646 | 0.686625529  | 0.022757112  | 1.552370807  | 0.314826498  | 0.032157942 | 0.59394508   | 0.032139392 | 1.317008656  | XM 624986.2 |
| chrUn      | 80163393  | 80165555  | XM 393730       | 2163   | 2163   |        |         |    | 3552           |    |        | 0.224225613  | 0.008788159 | 0.703727943  | 0.013876041  | 1.111149383  | 0.303824363  | 0.011396011 | 0.499312793  | 0.01994302  | 0.873797388  | XM 393730.3 |
| chr14      | 63201227  | 6328114   | XM 396550       | 7386   | 7386   |        |         |    | 3753           |    |        | 0.314429289  | 0.009325122 | 1.509217548  | 0.023752576  | 1.759191354  | 0.389438944  | 0.030856771 | 1.681113794  | 0.033662837 | 1.062152886  | XM 396550.3 |
| chr2       | 6293198   | 6317229   | AmelG2 WGA76    | 24032  | 23982  |        |         |    | 18530          |    |        | 0.017681401  | 0.18060698  | 0.020016681  | 0.922228818  | 0.323563204  | 0.292228818  | 0.022641101 | 0.060518273  | 0.02507854  | 1.74682322   | -           |
| chr8       | 5460017   | 5463374   | XM 624805       | 3358   | 3358   |        |         |    | 2948           |    |        | 0.247170935  | 0.00714924  | 0.473655646  | 0.014596366  | 0.967044739  | 0.269335142  | 0.007817811 | 0.436442295  | 0.016315432 | 0.910836095  | XM 624805.2 |
| chrUn      | 22332977  | 22339371  | XM 392606       | 6395   | 6395   |        |         |    | 5066           |    |        | 0.011416953  | 0.029718609 | 0.629718609  | 0.024241376  | 0.324703759  | 0.269335142  | 0.014274385 | 0.546247258  | 0.029936558 | 1.145601889  | XM 392606.3 |
| chr2       | 7468848   | 7469899   | AmelG2 WGA77    | 1052   | 1052   |        |         |    | 945            |    |        | 0.533269962  | 0.079923882 | 1.124200304  | 0.054234063  | 0.762850206  | 0.518518519  | 0.076514346 | 1.143835339  | 0.051009564 | 0.762568906  | -           |
| chr8       | 5221658   | 5376070   | XM 392492       | 154413 | 153425 |        |         |    | 143666         |    |        | 0.342486557  | 0.044779038 | 1.528476074  | 0.024811984  | 0.825421577  | 0.354997007  | 0.047455382 | 1.508077411  | 0.025648355 | 0.815075187  | -           |
| chr11      | 1160732   | 1165037   | XM 625195       | 4306   | 4306   |        |         |    | 3552           |    |        | 0.264746865  | 0.017189315 | 0.980975679  | 0.023925668  | 1.365412094  | 0.308277027  | 0.020903955 | 0.879689838  | 0.029906454 | 1.224821629  | XM 625195.2 |
| chr1       | 15947321  | 15951627  | XM 396550       | 4307   | 4307   |        |         |    | 3753           |    |        | 0.304388205  | 0.014398514 | 0.622557897  | 0.029261496  | 1.265198306  | 0.340794031  | 0.016564233 | 0.571398341  | 0.033662837 | 1.145212886  | XM 396550.3 |
| chrUn      | 204959586 | 204961053 | AmelGUn WGA585  | 1468   | 1468   |        |         |    | 9169           |    |        | 0.191489362  | 0.007419308 | 0.427054352  | 0.03993352   | 1.504526291  | 0.299659767  | 0.030518763 | 0.729605263  | 0.021008403 | 0.86260437   | -           |
| chrUn      | 4765058   | 4768031   | XM 392156       | 2974   | 2974   |        |         |    | 2339           |    |        | 0.299260256  | 0.021190716 | 0.946643607  | 0.031954255  | 1.427478456  | 0.3561351    | 0.026180258 | 0.825762289  | 0.039914163 | 1.258949064  | XM 392156.3 |
| chrUn      | 231635904 | 231636592 | AmelGUn WGA5326 | 2689   | 689    |        |         |    | 465            |    |        | 0.247107837  | 0.018895349 | 1.041814361  | 0.029069767  | 0.602790833  | 0.36344086   | 0.025974026 | 0.792805444  | 0.041125541 | 0.1255925287 | -           |
| chrUn      | 29367148  | 29368466  | XM 392893       | 1319   | 1319   |        |         |    | 1218           |    |        | 0.305534496  | 0.023520486 | 1.016394027  | 0.030349014  | 1.311476164  | 0.325944171  | 0.025514403 | 0.968611833  | 0.032921811 | 1.249240237  | -           |
| chrUn      | 24344181  | 24351222  | AmelGUn WGA621  | 7042   | 7042   |        |         |    | 6016           |    |        | 0.302038909  | 0.016190882 | 0.712875141  | 0.020735691  | 0.92450676   | 0.333942819  | 0.018814519 | 0.687359822  | 0.023643024 | 0.8637619    | -           |
| chr11      | 608826    | 612331    | XM 393754       | 3506   | 3506   |        |         |    | 3211           |    |        | 0.236804055  | 0.013085098 | 0.613085098  | 0.02168331   | 1.035477994  | 0.305823731  | 0.025588923 | 1.108638219  | 0.023400936 | 1.013998371  | XM 393754.2 |
| chr7       | 663757    | 6641999   | AmelG7 WGA234   | 4243   | 4313   |        |         |    | 3232           |    |        | 0.199379019  | 0.006680953 | 0.672645379  | 0.01026081   | 0.932971118  | 0.239789604  | 0.056344841 | 0.310367828  | 0.010185992 | -            |             |
| chr1       | 7324414   | 7326278   | XM 394489       | 1865   | 1865   |        |         |    | 1316           |    |        | 0.23100304   | 0.007419308 | 0.427054352  | 0.03993352   | 1.504526291  | 0.299659767  | 0.030518763 | 0.729605263  | 0.021008403 | 0.86260437   | -           |
| chr5       | 6004306   | 6013613   | XM 395359       | 9308   | 9308   |        |         |    | 6883           |    |        | 0.241405243  | 0.012786075 | 0.877998742  | 0.02181154   | 0.97762356   | 0.296672962  | 0.016921955 | 0.769316431  | 0.028592268 | 0.299879488  | XM 395359.3 |
| chrUn      | 49144430  | 49152640  | AmelGUn WGA961  | 8211   | 7470   |        |         |    | 6499           |    |        | 0.334939759  | 0.039105397 | 1.40579266   | 0.033212803  | 1.193906089  | 0.364671488  | 0.043216546 | 0.331815173  | 0.036579719 | 1.1210507    | -           |
| chr10      | 6759640   | 6767753   | XM 393510       | 8114   | 8114   |        |         |    | 5760           |    |        | 0.217402001  | 0.016393443 | 1.376820023  | 0.017256255  | 1.460652655  | 0.273784722  | 0.022505234 | 0.210089194  | 0.02337753  | 1.247559648  | XM 393510.3 |
| chrUn      | 38399298  | 38402211  | XM 395486       | 2914   | 2914   |        |         |    | 2680           |    |        | 0.28242965   | 0.019910745 | 1.020510526  | 0.023686921  | 1.214055626  | 0.302238806  | 0.024062243 | 0.96931142   | 0.025420561 | 1.1363434079 | XM 395486.3 |
| chr5       | 9506031   | 9509530   | XM 625180       | 3500   | 3500   |        |         |    | 2546           |    |        | 0.264857143  | 0.015718777 | 0.896605586  | 0.024292655  | 1.385636179  | 0.337391987  | 0.021       |              |             |              |             |

| chromosome | start     | end       | ID                                | length | valid length | without Ns | non-repetitive | nr length | qcContent   | cpaContent  | cpqo/E      | qpcContent  | cpqc/E      | nrGContent  | nrCpGContent | nrCpGGO/E   | nrGpCContent | nrGpCpC/E   | RefSeqID | version  |
|------------|-----------|-----------|-----------------------------------|--------|--------------|------------|----------------|-----------|-------------|-------------|-------------|-------------|-------------|-------------|--------------|-------------|--------------|-------------|----------|----------|
| chrUn      | 22656547  | 2267906   | AmelGUn WGA605 2.505328.505328.m  | 14360  | 14014        |            |                | 12370     | 0.315541601 | 0.034970026 | 0.026905165 | 0.026905551 | 0.080994539 | 0.344219887 | 0.039380925  | 0.329531167 | 0.030143424  | 0.017665832 | -        |          |
| chr14      | 6361665   | 6365922   | XM 623190                         | 4258   | 4258         |            |                | 30979     | 0.255049319 | 0.008926474 | 0.559001136 | 0.020671835 | 1.294528947 | 0.325430335 | 0.012393999  | 0.477169    | 0.028375734  | 1.059465869 | XM       | 623190.2 |
| chr1       | 17098480  | 17098968  | AmelG1 WGA48 2.506190.506190.m    | 489    | 489          |            |                | 452       | 0.028220859 | 0.004998361 | 0.022728204 | 0.020491803 | 0.113641021 | 0.300884956 | 0.004444444  | 0.211166925 | 0.055834625  | 0.055834625 |          |          |
| chr4       | 8034584   | 8034956   | XM 624556                         | 5095   | 4981         |            |                | 4981      | 0.3562316   | 0.050451512 | 1.596402203 | 0.028072242 | 0.887140667 | 0.352853136 | 0.004533988  | 1.570353005 | 0.028674558  | 0.873795057 | XM       | 624556.1 |
| chr10      | 9428515   | 9431528   | XM 391856                         | 3014   | 3014         |            |                | 2721      | 0.313866813 | 0.023896449 | 0.98261825  | 0.027879159 | 1.146387959 | 0.341418596 | 0.026519337  | 0.912789988 | 0.030939227  | 0.075421653 | XM       | 391856.3 |
| chr4       | 1284053   | 1303715   | AmelGA WGA130 2.513932.513932.m   | 19663  | 19357        |            |                | 17837     | 0.449449811 | 0.077189357 | 1.530258665 | 0.052131232 | 0.103487947 | 0.458877614 | 0.081132712  | 1.542335908 | 0.055343297  | 1.052078164 | -        |          |
| chr13      | 1065183   | 1066184   | AmelG13 WGA392 2.510224.510224.m  | 1002   | 1002         |            |                | 907       | 0.27245509  | 0.017982018 | 0.968979967 | 0.021978022 | 1.184307749 | 0.294377067 | 0.019889503  | 0.918083243 | 0.024309392  | 1.122101742 | -        |          |
| chr11      | 1366244   | 1368069   | XM 396595                         | 1826   | 1826         |            |                | 1425      | 0.265060241 | 0.010410959 | 0.998139233 | 0.020821918 | 1.196278467 | 0.317192982 | 0.012684989  | 0.510068439 | 0.0260747    | 1.048474033 | XM       | 396595.3 |
| chr2       | 302779    | 305833    | XM 393311                         | 3055   | 3055         |            |                | 2060      | 0.223567921 | 0.010478062 | 0.840264745 | 0.013425016 | 1.076592716 | 0.299029126 | 0.015151515  | 0.679391897 | 0.019061884  | 0.854718838 | -        |          |
| chr7       | 421913    | 422853    | XM 394667                         | 941    | 941          |            |                | 745       | 0.301806589 | 0.014893617 | 0.662448006 | 0.024648085 | 1.088307438 | 0.358389262 | 0.017496635  | 0.552330223 | 0.030955585  | 0.977199626 | XM       | 394667.2 |
| chr4       | 9418932   | 9422375   | XM 392352                         | 3444   | 3444         |            |                | 2757      | 0.261614402 | 0.021198664 | 0.741551329 | 0.017136218 | 1.041703057 | 0.309394269 | 0.015283843  | 0.663483106 | 0.019605605  | 0.853049708 | XM       | 392352.3 |
| chrUn      | 657777    | 665184    | XM 394718                         | 7408   | 7408         |            |                | 6683      | 0.337203024 | 0.01770895  | 0.612934594 | 0.034696908 | 1.230657739 | 0.368247793 | 0.019043335  | 0.567254158 | 0.038538512  | 1.147908021 | XM       | 394718.2 |
| chrUn      | 143712368 | 143713595 | AmelGUn WGA3043 2.508812.508812.m | 1228   | 1228         |            |                | 1228      | 0.402280013 | 0.030154849 | 0.764056774 | 0.044824736 | 1.136280339 | 0.402280133 | 0.030154849  | 0.764406774 | 0.044824776  | 1.136280339 | -        |          |
| chr9       | 1746935   | 1762180   | AmelG9 WGA285 2.520312.520312.m   | 15246  | 14470        |            |                | 13865     | 0.39398756  | 0.064003318 | 1.649346905 | 0.037461985 | 0.965384474 | 0.404832312 | 0.065790424  | 1.605729378 | 0.039142052  | 0.955329663 | -        |          |
| chr1       | 2088186   | 2090951   | AmelG1 WGA2 2.504182.504182.m     | 2766   | 2766         |            |                | 2551      | 0.354663774 | 0.042314647 | 1.34577254  | 0.039059675 | 1.242251576 | 0.378675029 | 0.045936396  | 1.281418587 | 0.042010208  | 1.171895631 | -        |          |
| chrUn      | 37178456  | 37181794  | XM 623970                         | 3339   | 3339         |            |                | 2266      | 0.232105421 | 0.004793289 | 0.368806106 | 0.016776513 | 1.290821372 | 0.305825243 | 0.007107952  | 0.315980116 | 0.023989338  | 1.066432892 | XM       | 623970.1 |
| chrUn      | 22345846  | 22347753  | XM 392865                         | 1908   | 1908         |            |                | 1218      | 0.218553459 | 0.016255899 | 1.453458499 | 0.015207132 | 1.359686983 | 0.293924466 | 0.024752475  | 1.21624573  | 0.023927393  | 1.074704206 | XM       | 392865.3 |
| chrUn      | 63977691  | 63978956  | XM 624336                         | 1266   | 1266         |            |                | 769       | 0.220379147 | 0.006324111 | 0.350181132 | 0.023715415 | 1.98817992  | 0.323797139 | 0.010471204  | 0.409541123 | 0.037958115  | 1.484586571 | XM       | 624336.1 |
| chr14      | 1726548   | 1729605   | XM 394017                         | 3058   | 3058         |            |                | 2009      | 0.391105298 | 0.047432123 | 1.245381422 | 0.039254171 | 1.030604888 | 0.394589244 | 0.048780584  | 1.234796697 | 0.039617035  | 1.021900714 | XM       | 394017.3 |
| chr10      | 4893212   | 4895907   | AmelG10 WGA321 2.501691.501691.m  | 2696   | 2696         |            |                | 2551      | 0.269658754 | 0.014842301 | 0.819059879 | 0.025602968 | 1.412878292 | 0.281458252 | 0.015698857  | 0.79565832  | 0.026687598  | 1.056219144 | -        |          |
| chr1       | 23992416  | 23996498  | AmelG1 WGA62 2.503523.503523.m    | 4083   | 4083         |            |                | 2314      | 0.207690424 | 0.013178765 | 1.27445787  | 0.014698677 | 1.365490575 | 0.295159896 | 0.020470383  | 0.942352134 | 0.025261324  | 1.16290265  | -        |          |
| chr1       | 11181886  | 11184894  | AmelG1 WGA31 2.506186.506186.m    | 3009   | 3009         |            |                | 3009      | 0.312306082 | 0.013297872 | 0.994318292 | 0.016954787 | 1.26775822  | 0.297374702 | 0.018714012  | 0.847849461 | 0.023992322  | 1.08696489  | -        |          |
| chr7       | 3686060   | 3688558   | XM 624190                         | 2499   | 2499         |            |                | 1955      | 0.25130052  | 0.01561249  | 0.990580211 | 0.021216974 | 1.346175554 | 0.29769821  | 0.019537275  | 0.884822658 | 0.02622108   | 1.187525146 | XM       | 624190.2 |
| chrUn      | 15047616  | 15049309  | XM 625111                         | 1694   | 1694         |            |                | 1275      | 0.245572609 | 0.010632014 | 0.713183979 | 0.020673361 | 1.386746626 | 0.299607843 | 0.014162077  | 0.642074593 | 0.02675059   | 1.212807564 | XM       | 625111.2 |
| chrUn      | 15257290  | 15258081  | AmelGUn WGA535 2.518013.518013.m  | 792    | 792          |            |                | 586       | 0.266414141 | 0.016434893 | 0.928740219 | 0.012642225 | 1.944145553 | 0.322525597 | 0.022298456  | 0.067469282 | 0.017152659  | 0.659591755 | -        |          |
| chrUn      | 15257544  | 152639518 | AmelGUn WGA5444 2.510833.510833.m | 789    | 789          |            |                | 619       | 0.219354839 | 0.025070783 | 0.970980452 | 0.019353971 | 1.074849152 | 0.324947523 | 0.024947523  | 1.074849152 | 0.024947523  | 1.074849152 | XM       | 624024.2 |
| chr5       | 11418327  | 11418327  | XM 624949                         | 789    | 789          |            |                | 539       | 0.253485425 | 0.020304659 | 1.390065543 | 0.013953981 | 0.948795061 | 0.377662387 | 0.005066649  | 0.020525238 | 0.783982209  | 0.624935.1  | XM       | 624935.1 |
| chr2       | 18878     | 21756     | XM 394280                         | 2879   | 2879         |            |                | 2785      | 0.327196943 | 0.040350768 | 1.515294642 | 0.02981862  | 1.123408097 | 0.336804309 | 0.041711615  | 1.481068794 | 0.030924128  | 0.98033761  | XM       | 394280.2 |
| chr2       | 3721892   | 3745936   | XM 394323                         | 24045  | 23614        |            |                | 21075     | 0.077040363 | 0.027039248 | 0.454576023 | 0.062080415 | 1.926208045 | 0.045970883 | 0.084549907  | 1.643930853 | 0.049075087  | 0.954182587 | -        |          |
| chr5       | 9627622   | 9639363   | AmelG5 WGA168 2.502588.502588.m   | 11742  | 11742        |            |                | 11487     | 0.382473173 | 0.052210204 | 1.429071523 | 0.031087642 | 0.850915344 | 0.38234526  | 0.052535285  | 0.147379752 | 0.031015856  | 0.848848981 | -        |          |
| chrUn      | 239870193 | 239894952 | AmelGUn WGA5540 2.515343.515343.m | 24760  | 24760        |            |                | 20490     | 0.317237498 | 0.024395169 | 1.315321319 | 0.019588836 | 1.056176887 | 0.313714007 | 0.029377203  | 1.194061891 | 0.025371763  | 0.955249513 | -        |          |
| chrUn      | 13913658  | 13915769  | XM 393519                         | 2112   | 2112         |            |                | 1572      | 0.215354901 | 0.020843202 | 1.55393235  | 0.015158693 | 1.131194418 | 0.284987277 | 0.02685422   | 1.323871739 | 0.020460358  | 1.008646182 | XM       | 393519.3 |
| chr12      | 4308982   | 4311655   | AmelG12 WGA385 2.504209.504209.m  | 2674   | 2674         |            |                | 2003      | 0.010475122 | 0.097510137 | 0.997510137 | 0.011971568 | 1.13601299  | 0.255117324 | 0.013547416  | 0.084862954 | 0.015052684  | 0.942292171 | -        |          |
| chrUn      | 5101685   | 51017861  | XM 396405                         | 6240   | 6240         |            |                | 2009      | 0.210927152 | 0.009538925 | 1.052841421 | 0.019396983 | 1.3808429   | 0.272026962 | 0.009196581  | 0.09545679  | 0.021424991  | 1.006196581 | XM       | 624024.2 |
| chr11      | 1713312   | 1717020   | AmelG11 WGA351 2.503700.503700.m  | 3709   | 3709         |            |                | 3618      | 0.349150714 | 0.040722762 | 1.042028234 | 0.030474649 | 1.002952254 | 0.35599789  | 0.041770401  | 1.321830875 | 0.031258645  | 0.989184695 | -        |          |
| chr2       | 10237156  | 10239017  | XM 394365                         | 1862   | 1862         |            |                | 1212      | 0.191729323 | 0.04083611  | 0.544277246 | 0.014508329 | 1.632831738 | 0.254950458 | 0.00746888   | 0.021576763 | 0.01756763   | 0.9757967   | -        |          |
| chr11      | 4314876   | 4319431   | AmelG11 WGA355 2.515391.515391.m  | 4556   | 4556         |            |                | 3322      | 0.218173837 | 0.009440176 | 0.79375776  | 0.016245884 | 1.366001727 | 0.275135461 | 0.012401694  | 0.656018362 | 0.021778584  | 1.152032246 | -        |          |
| chrUn      | 23683178  | 23693800  | AmelGUn WGA616 2.505496.505496.m  | 10623  | 10573        |            |                | 8072      | 0.256691573 | 0.020244064 | 1.272485943 | 0.023271214 | 1.462764215 | 0.312809713 | 0.025863524  | 1.098623897 | 0.029865605  | 1.267642959 | -        |          |
| chr4       | 6448662   | 6450941   | XM 394827                         | 2280   | 2280         |            |                | 1975      | 0.260526316 | 0.01667398  | 0.98965835  | 0.02062308  | 1.224048097 | 0.29113924  | 0.019330843  | 0.921578765 | 0.023882114  | 1.13984742  | XM       | 394827.2 |
| chrUn      | 1130853   | 1160745   | AmelG14 WGA409 2.516408.516408.m  | 33823  | 32005        |            |                | 27913     | 0.265123024 | 0.077041231 | 1.437734009 | 0.047315002 | 0.828867959 | 0.481746856 | 0.087606991  | 1.509954708 | 0.054232899  | 0.934733867 | -        |          |
| chrUn      | 46629293  | 466293322 | XM 393322                         | 1201   | 1201         |            |                | 719       | 0.221473731 | 0.001697521 | 0.947470731 | 0.019470731 | 1.21026867  | 0.01980196  | 0.01980196   | 0.01980196  | 0.01980196   | 0.01980196  | XM       | 393322.3 |
| chr4       | 2159327   | 2161439   | XM 392819                         | 1503   | 1503         |            |                | 1428      | 0.348636061 | 0.003994674 | 1.131554836 | 0.023968043 | 1.738929018 | 0.362745098 | 0.004207574  | 1.28059593  | 0.02545442   | 0.768357216 | XM       | 392819.2 |
| chrUn      | 9067284   | 9096967   | XM 396750                         | 2384   | 2384         |            |                | 1863      | 0.237416107 | 0.00923206  | 0.65692002  | 0.015946286 | 1.248447386 | 0.384847308 | 0.011326861  | 0.562127052 | 0.100496224  | 1.07182284  | XM       | 396750.3 |
| chr7       | 6325465   | 6371692   | XM 392736                         | 46228  | 46228        |            |                | 39044     | 0.286245654 | 0.031496744 | 1.577068539 | 0.021242997 | 1.063654743 | 0.319921115 | 0.037149317  | 1.451861662 | 0.025074504  | 0.975956419 | XM       | 392736.3 |
| chr12      | 707881    | 721021    | AmelG12 WGA377 2.500366.500366.m  | 13145  | 12545        |            |                | 11254     | 0.231962255 | 0.034852655 | 1.596137205 | 0.030856323 | 1.023100179 | 0.356317754 | 0.048254986  | 1.52044416  | 0.033653846  | 1.060383565 | -        |          |
| chr2       | 2050194   | 2052205   | XM 392211                         | 2012   | 2012         |            |                | 1920      | 0.409542744 | 0.062655395 | 1.459966114 | 0.041770264 | 0.997310743 | 0.427604167 | 0.065762004  | 1.440690867 | 0.043841336  | 0.960460578 | XM       | 392211.3 |

| chromosome | start     | end       | ID                                | length | valid length without Ns | non-repetitive nr length | qcContent    | cpaContent  | cpqQ/E      | qpcContent  | apqcQ/E      | nrGpContent | nrGpGContent | nrGpGQ/E    | nrGpGQContent | nrGpGQContent | RefSeqID    | version |
|------------|-----------|-----------|-----------------------------------|--------|-------------------------|--------------------------|--------------|-------------|-------------|-------------|--------------|-------------|--------------|-------------|---------------|---------------|-------------|---------|
| chr10      | 6621264   | 6623621   | XM 392941                         | 2358   | 2358                    | 1465                     | 0.0042425428 | 0.004242681 | 0.355774805 | 0.017819262 | 1.494254182  | 0.302389078 | 0.006858711  | 0.300157744 | 0.027434842   | 1.200630976   | XM 392941.3 | -       |
| chr4       | 858333    | 863784    | XM 623482                         | 5452   | 5452                    | 5056                     | 0.336023478  | 0.045129334 | 1.601650134 | 0.029352412 | 1.041723665  | 0.354232595 | 0.048137876  | 1.538482316 | 0.041974623   | 1.006661269   | -           | -       |
| chrUn      | 86549819  | 86587311  | XM 396050                         | 37493  | 37493                   | 34234                    | 0.346944763  | 0.056278673 | 1.870389463 | 0.031766777 | 1.05575064   | 0.367909096 | 0.060751492  | 1.795761784 | 0.034092239   | 1.795761784   | -           | -       |
| chr7       | 1235507   | 1241449   | XM 624189                         | 55943  | 55943                   | 52533                    | 0.379817343  | 0.057831983 | 1.590358239 | 0.012825729 | 0.910567085  | 0.387590804 | 0.059825802  | 1.58901243  | 0.034191518   | 1.550815854   | XM 624189.2 | -       |
| chr1       | 19416842  | 19417889  | XM 394147                         | 1048   | 1048                    | 1048                     | 0.410305344  | 0.067812798 | 1.629885161 | 0.038204394 | 0.918243133  | 0.410305344 | 0.067812798  | 1.629885161 | 0.038204394   | 0.918243133   | XM 394147.3 | -       |
| chrUn      | 119972930 | 119974749 | AmelGUn WGA2426 2.509478.509478.m | 1820   | 1820                    | 1098                     | 0.273076523  | 0.009345794 | 0.505090706 | 0.019241341 | 0.380926229  | 0.340523883 | 0.01006192   | 0.349158886 | 0.024767802   | 0.859468027   | -           | -       |
| chr5       | 11953752  | 11968455  | XM 392392                         | 14704  | 14472                   | 13231                    | 0.367399116  | 0.052180524 | 1.546301126 | 0.03206856  | 0.950309566  | 0.383493311 | 0.05650659   | 1.536916422 | 0.034388729   | 0.935335195   | XM 392392.3 | -       |
| chr1       | 1412324   | 1418040   | XM 393123                         | 5717   | 5667                    | 4476                     | 0.267866596  | 0.010414828 | 0.592823541 | 0.021535746 | 1.225838508  | 0.326184093 | 0.013234634  | 0.509337273 | 0.053205886   | XM 393123.3   | -           | -       |
| chrUn      | 5053357   | 5054851   | XM 625313                         | 1495   | 1495                    | 1138                     | 0.240133779  | 0.008032129 | 0.573729883 | 0.020749665 | 1.482135531  | 0.295254833 | 0.010619469  | 0.499226065 | 0.027433628   | 1.289667335   | XM 625313.2 | -       |
| chr13      | 575348    | 577363    | XM 624396                         | 2016   | 2016                    | 1915                     | 0.246527778  | 0.008933002 | 0.593701088 | 0.018858561 | 1.253368964  | 0.268333333 | 0.010022272  | 0.563048973 | 0.021158129   | 1.188658942   | XM 624396.2 | -       |
| chr12      | 6730643   | 6737671   | XM 624692                         | 7029   | 7029                    | 5161                     | 0.20785318   | 0.005833808 | 0.551195418 | 0.016789983 | 1.586367302  | 0.254020539 | 0.007398754  | 0.466895974 | 0.02161215    | 1.368792818   | XM 624692.2 | -       |
| chr5       | 9655350   | 9662422   | XM 623144                         | 7073   | 7073                    | 5992                     | 0.287572459  | 0.01897964  | 0.919799585 | 0.028704751 | 1.39342773   | 0.327436582 | 0.022434288  | 0.839820687 | 0.032981751   | 1.234661756   | -           | -       |
| chr1       | 20607852  | 20619646  | XM 624115                         | 11795  | 11795                   | 7125                     | 0.207322265  | 0.011411053 | 1.078188139 | 0.016009538 | 1.512673029  | 0.286637338 | 0.017439446  | 0.861322416 | 0.02421453    | 1.368781133   | XM 623115.2 | -       |
| chrUn      | 27001844  | 27013711  | XM 625052                         | 11868  | 11868                   | 8914                     | 0.23702393   | 0.01028061  | 0.74079543  | 0.020224151 | 1.457302484  | 0.289544537 | 0.013626126  | 0.657818833 | 0.026351351   | 1.272145512   | XM 625052.2 | -       |
| chr10      | 4567268   | 4569026   | XM 623117                         | 1759   | 1759                    | 1485                     | 0.257532689  | 0.007963595 | 0.489763625 | 0.024459613 | 1.50427399   | 0.292929293 | 0.009459459  | 0.450408872 | 0.029054054   | 1.383398678   | XM 623117.2 | -       |
| chr3       | 4732970   | 4748208   | AmelG3 WGA107 2.508749.508749.m   | 15239  | 15239                   | 14518                    | 0.200605003  | 0.065362909 | 1.617596477 | 0.033403334 | 0.82666326   | 0.415277586 | 0.068630156  | 1.592246951 | 0.035039316   | 1.012926082   | -           | -       |
| chrUn      | 21317339  | 21319597  | AmelGUn WGA591 2.502321.502321.m  | 2259   | 1986                    | 1414                     | 0.402400282  | 0.00453629  | 0.457924297 | 0.013104839 | 1.322892415  | 0.256718529 | 0.005698006  | 0.353960411 | 0.017806268   | 1.081612628   | -           | -       |
| chr7       | 1346956   | 1351128   | AmelG7 WGA216 2.506106.506106.m   | 4173   | 4173                    | 3604                     | 0.292115984  | 0.018696069 | 0.877117599 | 0.028044104 | 1.155767398  | 0.330466149 | 0.021720969  | 0.796351088 | 0.032581454   | 1.094526632   | -           | -       |
| chr13      | 8070702   | 8093551   | AmelG13 WGA404 2.502046.502046.m  | 22850  | 21061                   | 17523                    | 0.319358055  | 0.036375724 | 1.426782288 | 0.02678317  | 1.050528996  | 0.358842664 | 0.043147353  | 1.340737675 | 0.031645207   | 0.983326173   | -           | -       |
| chrUn      | 93801173  | 93803788  | XM 623702                         | 2616   | 2239                    | 1811                     | 0.26016079   | 0.0098346   | 0.51267901  | 0.02384445  | 1.255781761  | 0.315847598 | 0.008879023  | 0.358135567 | 0.04972253    | 1.075625281   | XM 623702.2 | -       |
| chr2       | 4193536   | 4194496   | XM 623872                         | 961    | 961                     | 491                      | 0.197710718  | 0.005208333 | 0.569298758 | 0.016666667 | 1.2821756026 | 0.33401222  | 0.010309278  | 0.395570768 | 0.032989691   | 1.265826457   | XM 623872.1 | -       |
| chrUn      | 307681708 | 307683240 | AmelGUn WGA7307 2.506172.506172.m | 1533   | 1533                    | 1533                     | 0.365296804  | 0.0345953   | 1.044060492 | 0.054177546 | 1.635038129  | 0.365296804 | 0.0345953    | 1.044060492 | 0.054177546   | 1.635038129   | -           | -       |
| chr15      | 2564924   | 2571116   | AmelG15 WGA432 2.521758.521758.m  | 6193   | 6193                    | 5639                     | 0.311157759  | 0.033107235 | 1.36802722  | 0.02371783  | 1.12211499   | 0.330555063 | 0.036234458  | 1.326466044 | 0.029484902   | 1.079379232   | -           | -       |
| chr1       | 5272546   | 5273892   | AmelG1 WGA14 2.505513.505513.m    | 1347   | 1347                    | 1098                     | 0.315515971  | 0.014858841 | 0.684205851 | 0.024517088 | 1.062396654  | 0.33369466  | 0.01275291   | 0.65674895  | 0.023010547   | 0.981656267   | -           | -       |
| chr7       | 8442749   | 8449202   | XM 392479                         | 6454   | 6454                    | 5703                     | 0.338239851  | 0.038431737 | 1.349323448 | 0.03176817  | 1.115368173  | 0.370506751 | 0.043404949  | 1.270228822 | 0.03602812    | 1.054238496   | XM 392479.3 | -       |
| chr12      | 21542783  | 21547420  | XM 392873                         | 52487  | 52487                   | 49084                    | 0.248220641  | 0.048220641 | 1.260972019 | 0.016697201 | 1.040872904  | 0.340872904 | 0.016697201  | 1.040872904 | 0.340872904   | 1.040872904   | XM 392873.3 | -       |
| chr5       | 9467765   | 9470123   | XM 394573                         | 2359   | 2359                    | 2001                     | 0.399745655  | 0.020356234 | 0.515706184 | 0.02832909  | 0.948295852  | 0.204036054 | 0.024036054  | 0.579963991 | 0.035085858   | 1.394241485   | XM 394573.2 | -       |
| chr14      | 2761740   | 2769312   | XM 393994                         | 7573   | 7573                    | 7573                     | 0.460715701  | 0.074088748 | 1.397024625 | 0.045298468 | 0.854152311  | 0.460715701 | 0.074088748  | 1.397024625 | 0.045298468   | 0.854152311   | XM 393994.2 | -       |
| chr9       | 5638495   | 5654779   | XM 393297                         | 16285  | 16285                   | 13228                    | 0.284617746  | 0.030152297 | 1.049150871 | 0.024379759 | 1.205965349  | 0.32907469  | 0.036565013  | 1.352527607 | 0.029585799   | 1.094368811   | XM 393297.3 | -       |
| chrUn      | 183345026 | 183346239 | AmelGUn WGA4069 2.509316.509316.m | 1214   | 1214                    | 1214                     | 0.368204283  | 0.02885408  | 0.870293615 | 0.052761748 | 1.594685467  | 0.368204283 | 0.02885408   | 0.870293615 | 0.052761748   | 1.594685467   | -           | -       |
| chr11      | 1525202   | 1590774   | XM 623895                         | 6573   | 6294                    | 59946                    | 0.350332042  | 0.053129277 | 1.731708756 | 0.028508772 | 0.92621941   | 0.366196243 | 0.056686994  | 1.699050505 | 0.03536695    | 0.905504068   | XM 623895.2 | -       |
| chr12      | 8142505   | 8146009   | XM 396019                         | 3505   | 3505                    | 3015                     | 0.268473609  | 0.009417808 | 0.542724502 | 0.03196347  | 1.841974069  | 0.302487562 | 0.010638298  | 0.484802485 | 0.032734043   | 1.696808697   | XM 396019.3 | -       |
| chr2       | 6161689   | 6163035   | XM 397519                         | 1347   | 1347                    | 1347                     | 0.466523013  | 0.076523013 | 1.514706717 | 0.046062407 | 0.911765208  | 0.046062407 | 0.911765208  | 0.046062407 | 0.911765208   | 0.911765208   | XM 397519.3 | -       |
| chr13      | 2182897   | 2189651   | XM 624517                         | 26710  | 26710                   | 20569                    | 0.412336172  | 0.07357138  | 1.457612125 | 0.017306167 | 1.083097056  | 0.330258303 | 0.08154953   | 1.471675947 | 0.049485873   | 1.393977.3    | -           | -       |
| chr11      | 2134361   | 2140914   | XM 393743                         | 6554   | 6317                    | 5315                     | 0.277821751  | 0.029136975 | 1.51034017  | 0.024386382 | 1.264089061  | 0.313264346 | 0.034736643  | 1.415890996 | 0.028884274   | 1.177344143   | XM 393743.3 | -       |
| chrUn      | 44634033  | 44640643  | AmelGUn WGA889 2.501001.501001.m  | 6611   | 6008                    | 4339                     | 0.248169108  | 0.026307026 | 1.711837281 | 0.015948016 | 1.041033664  | 0.286471537 | 0.022706209  | 1.114085594 | 0.026062945   | 1.07117611    | -           | -       |
| chrUn      | 62064395  | 62080011  | AmelGUn WGA1167 2.509132.509132.m | 15617  | 15178                   | 13560                    | 0.338318619  | 0.045074315 | 1.583645382 | 0.032553542 | 1.443743887  | 0.361873156 | 0.049689441  | 1.525684419 | 0.036083999   | 1.107937494   | -           | -       |
| chrUn      | 19003677  | 19007253  | XM 396707                         | 2470   | 2470                    | 2470                     | 0.242381884  | 0.015939597 | 1.084768492 | 0.018176734 | 1.094095649  | 0.32145749  | 0.021544715  | 0.890047091 | 0.02601626    | 1.074773846   | XM 396707.2 | -       |
| chrUn      | 134015121 | 134016546 | AmelGUn WGA2788 2.510982.510982.m | 1426   | 1426                    | 1328                     | 0.283309958  | 0.015438596 | 0.778621415 | 0.023859649 | 1.302324004  | 0.299698798 | 0.016603734  | 0.747756625 | 0.025660377   | 1.155623875   | -           | -       |
| chrUn      | 16802422  | 16805195  | XM 624363                         | 2774   | 2774                    | 1972                     | 0.218817592  | 0.005769924 | 0.486618068 | 0.015885532 | 1.399026946  | 0.276369168 | 0.008159102  | 0.432945611 | 0.022947476   | 1.219095309   | XM 624363.2 | -       |
| chrUn      | 29530706  | 295314789 | XM 394768                         | 10384  | 10384                   | 8194                     | 0.242488444  | 0.038817201 | 1.276108701 | 0.013887201 | 1.316114384  | 0.024092804 | 0.021433611  | 1.749119491 | 0.034260161   | 1.494241485   | XM 394768.3 | -       |
| chr9       | 527643    | 527643    | XM 394768                         | 1597   | 1597                    | 1517                     | 0.313713212  | 0.028822055 | 1.09259219  | 0.028822055 | 1.190259219  | 0.328938695 | 0.030383091  | 1.142600148 | 0.030383091   | 1.142600148   | XM 394768.3 | -       |
| chr6       | 6994669   | 6998773   | AmelG6 WGA199 2.500757.500757.m   | 4105   | 4105                    | 3495                     | 0.363215593  | 0.048976608 | 1.511361312 | 0.038639636 | 0.945170261  | 0.363662375 | 0.0510907    | 1.5488402   | 0.038780565   | 1.74682175    | -           | -       |
| chr15      | 6141164   | 6143082   | AmelG15 WGA439 2.506897.506897.m  | 1919   | 1919                    | 1720                     | 0.279832464  | 0.017726799 | 0.951106226 | 0.012909282 | 0.995805893  | 0.301162791 | 0.019790454  | 0.88238605  | 0.020954598   | 0.934291111   | -           | -       |
| chr10      | 900143    | 907409    | XM 393666                         | 7267   | 7267                    | 6651                     | 0.292692996  | 0.018854941 | 0.88797686  | 0.024910542 | 1.1731676    | 0.315290934 | 0.020485013  | 0.830742824 | 0.027263142   | 1.105620965   | XM 393666.3 | -       |
| chr13      | 423288    | 444114    | XM 393892                         | 20287  | 20287                   | 19685                    | 0.443781372  | 0.084442473 | 1.71597809  | 0.049378736 | 1.107054175  | 0.448202926 | 0.085815963  | 1.709056206 | 0.05088968    | 1.013486529   | XM 393892.3 | -       |
| chr1       | 16068687  | 16073535  | XM 623675                         | 6669   | 6669                    | 6544                     | 0.38431549   | 0.063737253 | 1.726240971 | 0.036442711 | 1.098703661  | 0.391198044 | 0.064994467  | 1.698891745 | 0.037161646   | 0.973636339   | XM 623675.3 | -       |
| chrUn      | 155573961 | 155578694 | XM 623964                         | 4734   | 4734                    |                          |              |             |             |             |              |             |              |             |               |               |             |         |

| chromosome | start     | end       | ID              | length            | valid length | without Ns | non-repetitive | nr length    | qcContent   | cpaContent  | cpqQ/E      | qpcContent  | qpcQ/E      | nrGContent  | nrCpGContent | nrCpGQ/E    | nrGpCContent | nrGpCQ/E    | RefSeqID | version |
|------------|-----------|-----------|-----------------|-------------------|--------------|------------|----------------|--------------|-------------|-------------|-------------|-------------|-------------|-------------|--------------|-------------|--------------|-------------|----------|---------|
| chrUn      | 2798320   | 2803635   | AmelGUn WGA461  | 2.505479.505479.m | 5316         | 5316       | 4521           | 0.289879609  | 0.013546566 | 0.644962621 | 0.027281279 | 1.298883057 | 0.327361203 | 0.015534842 | 0.580508241  | 0.03195739  | 1.194188382  | -           | -        | -       |
| chr5       | 11407213  | 11411489  | AmelG5 WGA170   | 2.511272.511272.m | 4277         | 4277       | 3932           | 0.350245499  | 0.05121609  | 1.670164383 | 0.031571562 | 1.029535387 | 0.372828325 | 0.055541401 | 1.598515088  | 0.034394904 | 0.988906132  | -           | -        | -       |
| chr5       | 11487270  | 11489170  | AmelG5 WGA124   | 2.508586.508586.m | 1901         | 1901       | 1762           | 0.407680168  | 0.054210526 | 0.046842105 | 0.128393778 | 0.416572077 | 0.058589306 | 1.35052074  | 0.034212742  | 1.088283703 | -            | -           | -        | -       |
| chr6       | 515903    | 516423    | XM 392423       | 1745              | 1745         | 1289       | 0.240687679    | 0.019614679  | 0.832616147 | 1.836265676 | 0.026316147 | 1.836265676 | 0.301794329 | 0.015606264 | 0.69467981   | 0.034211373 | 1.574855582  | XM 392423.3 | -        | -       |
| chr4       | 626396    | 628713    | AmelG4 WGA127   | 2.507252.507252.m | 2318         | 2318       | 1781           | 0.229508197  | 0.018126888 | 1.381532172 | 0.018990073 | 1.447319198 | 0.273441887 | 0.021984216 | 1.179198411  | 0.02367531  | 1.269905981  | -           | -        | -       |
| chr7       | 7895159   | 8010498   | XM 392472       | 115340            | 109506       | 102566     | 0.378043212    | 0.060306006  | 1.68819394  | 0.035761589 | 1.001102586 | 0.387350584 | 0.062995126 | 1.679688247 | 0.060550583  | 1.748417478 | XM 392472.3  | -           | -        | -       |
| chr15      | 3801351   | 3817040   | XM 623898       | 15690             | 15690        | 11903      | 0.271128107    | 0.026834088  | 1.463008276 | 0.024794442 | 1.351805747 | 0.330756952 | 0.034889601 | 1.278710508 | 0.031939997  | 1.17029621  | XM 623898.2  | -           | -        | -       |
| chrUn      | 3309966   | 3316362   | AmelGUn WGA462  | 2.511157.511157.m | 6397         | 5582       | 3499           | 0.3618235817 | 0.003589744 | 0.421383546 | 0.012136752 | 1.424677704 | 0.260361013 | 0.00575374  | 0.340851238  | 0.019562716 | 1.15889421   | -           | -        | -       |
| chrUn      | 157524475 | 157525345 | XM 624272       | 871               | 871          | 871        | 0.420206659    | 0.026436782  | 0.598955545 | 0.050574713 | 1.145828    | 0.420206659 | 0.026436782 | 0.598955545 | 0.050574713  | 1.145828    | XM 624272.1  | -           | -        | -       |
| chr5       | 13243248  | 13245552  | XM 396003       | 2305              | 2305         | 1700       | 0.226464208    | 0.005225986  | 0.020399306 | 1.606968944 | 0.285294118 | 0.013002364 | 0.645583482 | 0.027777778 | 1.379210075  | XM 396003.3 | -            | -           | -        |         |
| chrUn      | 64316965  | 64533965  | XM 397178       | 37001             | 37001        | 27051      | 0.230642415    | 0.01972973   | 1.50307199  | 0.014945946 | 1.124760911 | 0.283390633 | 0.026651819 | 1.328811289 | 0.019821826  | 0.988280262 | XM 397178.3  | -           | -        | -       |
| chr11      | 2744388   | 2745747   | XM 625063       | 1360              | 1360         | 1276       | 0.295588235    | 0.02092385   | 0.982140167 | 0.023546726 | 1.122445905 | 0.315047022 | 0.022012579 | 0.923696611 | 0.025157233  | 1.05565327  | 1.05565327   | -           | -        | -       |
| chr9       | 8508328   | 8512074   | XM 394820       | 3747              | 3747         | 3330       | 0.273819055    | 0.0093433    | 0.501069554 | 0.02269087  | 1.02883204  | 0.300900901 | 0.010538202 | 0.467874789 | 0.025829522  | 1.128289495 | -            | -           | -        | -       |
| chr1       | 14255160  | 14263682  | XM 623950       | 8523              | 8523         | 8061       | 0.371348117    | 0.049518892  | 1.437513757 | 0.039547008 | 1.147967147 | 0.389033619 | 0.052435388 | 1.386922907 | 0.041873757  | 1.107566397 | XM 623950.2  | -           | -        | -       |
| chr11      | 65718     | 79973     | XM 391883       | 14256             | 13767        | 12413      | 0.295634488    | 0.033493171  | 1.533228389 | 0.024702121 | 1.13079751  | 0.318295336 | 0.036821705 | 1.454708913 | 0.027212532  | 1.075080929 | XM 391883.3  | -           | -        | -       |
| chr5       | 4896115   | 4902806   | XM 624572       | 6692              | 6692         | 6453       | 0.403466826    | 0.061874159  | 1.522002007 | 0.040352713 | 1.099261005 | 0.406632574 | 0.063314711 | 1.531852898 | 0.040968343  | 0.991198934 | XM 624572.2  | -           | -        | -       |
| chr3       | 995442    | 999021    | XM 392262       | 3580              | 3580         | 3359       | 0.329608939    | 0.044425817  | 1.645608275 | 0.03101425  | 1.48861136  | 0.345638583 | 0.046809379 | 1.576564687 | 0.030948412  | 1.114641276 | XM 392262.2  | -           | -        | -       |
| chrUn      | 302873693 | 302874990 | AmelGUn WGA179  | 2.508008.508008.m | 1298         | 1298       | 1298           | 0.354391371  | 0.028527371 | 0.943078026 | 0.043176561 | 1.427361337 | 0.354391371 | 0.028527371 | 0.943078026  | 0.043176561 | 1.427361337  | -           | -        | -       |
| chr1       | 23763953  | 23787550  | XM 623782       | 23598             | 22770        | 21084      | 0.365524813    | 0.056351019  | 1.69005609  | 0.031140197 | 0.93394701  | 0.380051224 | 0.060316555 | 1.672224975 | 0.033414136  | 0.926378375 | 1.05565327   | -           | -        | -       |
| chr4       | 10288533  | 10309161  | AmelG4 WGA145   | 2.503083.503083.m | 20629        | 20629      | 19035          | 0.446264967  | 0.066947836 | 0.06096762  | 0.866212074 | 0.453328262 | 0.070011054 | 1.362952551 | 0.045112386  | 0.872833335 | -            | -           | -        | -       |
| chr8       | 7406614   | 7050171   | XM 395119       | 3558              | 3558         | 3022       | 0.272344013    | 0.012369975  | 0.670740182 | 0.020241777 | 1.097515934 | 0.310721377 | 0.014613085 | 0.609962833 | 0.02324809   | 0.970395416 | XM 395119.2  | -           | -        | -       |
| chrUn      | 12982560  | 12983205  | AmelGUn WGA516  | 2.504318.504318.m | 646          | 646        | 526            | 0.243034056  | 0.010852713 | 0.748349447 | 0.02635689  | 0.281368821 | 0.013358779 | 0.685088681 | 0.032442748  | 1.663786797 | -            | -           | -        | -       |
| chrUn      | 28817803  | 28820921  | XM 623103       | 3119              | 3119         | 1778       | 0.216415518    | 0.007697242  | 0.665600608 | 0.016677357 | 1.442133482 | 0.311023622 | 0.011898017 | 0.495560891 | 0.02776204   | 1.156306875 | XM 623103.2  | -           | -        | -       |
| chr3       | 10440126  | 10542492  | NM 001011631.1  | 102367            | 102361       | 97809      | 0.422094352    | 0.070850756  | 1.597068195 | 0.042322873 | 0.950249286 | 0.426320686 | 0.072921571 | 1.605098591 | 0.043308699  | 0.953280761 | -            | -           | -        | -       |
| chr5       | 7868772   | 7870897   | XM 624787       | 2126              | 2126         | 1595       | 0.259172154    | 0.02235294   | 0.729154742 | 0.014117647 | 0.841332394 | 0.323510972 | 0.016383113 | 0.626752609 | 0.018903592  | 1.23716088  | XM 624787.2  | -           | -        | -       |
| chr1       | 1101111   | 1101111   | AmelG1 WGA31    | 2.505351.505351.m | 175          | 175        | 157            | 0.234029851  | 0.05116716  | 0.437090765 | 0.015117416 | 0.84714799  | 0.007093446 | 0.284130346 | 0.346789116  | 0.024141307 | 1.08976392   | -           | -        | -       |
| chrUn      | 20304382  | 20303786  | XM 624389       | 2405              | 2405         | 1466       | 0.240498005    | 0.007071554  | 0.727372742 | 0.014559068 | 0.386355645 | 0.293311443 | 0.011667811 | 0.543428075 | 0.02335621   | 0.08685515  | XM 624389.2  | -           | -        | -       |
| chrUn      | 210143207 | 210143874 | AmelGUn WGA4765 | 2.506483.506483.m | 668          | 668        | 464            | 0.252994012  | 0.011994003 | 0.761310383 | 0.025487256 | 1.17647564  | 0.346982759 | 0.017391304 | 0.589835895  | 0.036956522 | 1.253401277  | -           | -        | -       |
| chr10      | 7750294   | 7762843   | XM 624709       | 12550             | 12549        | 12008      | 0.324966133    | 0.040168965  | 1.051256582 | 0.02932972  | 1.11095917  | 0.33311259  | 0.04194132  | 1.030684566 | 0.021627562  | -           | -            | -           | -        |         |
| chr6       | 5901923   | 5903283   | NM 001011616.1  | 1361              | 1361         | 996        | 0.227038942    | 0.014705882  | 1.144634621 | 0.014705882 | 1.144634621 | 0.280120482 | 0.018126888 | 0.926056398 | 0.020140987  | 1.028951554 | -            | -           | -        | -       |
| chr1       | 22032403  | 22043387  | XM 396822       | 10985             | 10698        | 9248       | 0.36072163     | 0.034498878  | 1.06916901  | 0.033002992 | 1.022809408 | 0.398356401 | 0.038886482 | 0.992012963 | 0.03715338   | 0.947800686 | XM 396822.3  | -           | -        | -       |
| chrUn      | 7292275   | 7294993   | XM 623160       | 2719              | 2719         | 2150       | 0.220669364    | 0.00919794   | 0.717742962 | 0.020603385 | 0.026070235 | 0.262790698 | 0.011660448 | 0.695040874 | 0.025652985  | 1.529089923 | XM 623160.2  | -           | -        | -       |
| chr7       | 3383442   | 3386233   | NM 001010975.1  | 2792              | 2792         | 1948       | 0.290830946    | 0.020422788  | 0.968405489 | 0.030455034 | 1.444113449 | 0.327136632 | 0.029351184 | 0.841028276 | 0.042224511  | 1.209903227 | -            | -           | -        | -       |
| chr13      | 1328394   | 1328939   | XM 394781       | 10698             | 10698        | 10360      | 0.488222098    | 0.04831827   | 1.28305653  | 0.05755604  | 0.781948601 | 0.492760618 | 0.084259618 | 0.398985861 | 0.02063595   | 0.899876932 | XM 394781.3  | -           | -        | -       |
| chrUn      | 24546782  | 24550940  | XM 395730       | 4159              | 3896         | 1752       | 0.196095863    | 0.004365691  | 0.454814497 | 0.011813046 | 1.230674522 | 0.3293379   | 0.008083141 | 0.298097285 | 0.02486279   | 0.915584519 | XM 395730.3  | -           | -        | -       |
| chr2       | 5038039   | 5039185   | AmelG2 WGA74    | 2.501394.501394.m | 1147         | 1147       | 1147           | 0.387968614  | 0.065445026 | 1.740239014 | 0.037521815 | 0.997373035 | 0.387968614 | 0.065445026 | 1.740239014  | 0.037521815 | 0.997373035  | -           | -        | -       |
| chr13      | 1628158   | 1629982   | XM 623305       | 1825              | 1825         | 1492       | 0.286027397    | 0.021381759  | 1.071854626 | 0.026864035 | 1.346689146 | 0.336461126 | 0.026244953 | 0.951498263 | 0.03230148   | 1.171074785 | XM 623305.2  | -           | -        | -       |
| chr3       | 5392294   | 5394392   | XM 623437       | 2639              | 2639         | 1997       | 0.255020841    | 0.007581501  | 0.474223169 | 0.021607278 | 1.35153603  | 0.316975463 | 0.010055304 | 0.406016681 | 0.028657617  | 1.157147542 | XM 623437.2  | -           | -        | -       |
| chr1       | 22049528  | 22052821  | XM 393377       | 3294              | 3294         | 2351       | 0.263530905    | 0.020364189  | 1.161872239 | 0.021560887 | 1.231237716 | 0.340280732 | 0.028620428 | 0.99427946  | 0.029474584  | 1.023959443 | XM 393377.3  | -           | -        | -       |
| chr3       | 5380851   | 5382121   | AmelG3 WGA108   | 2.500901.500901.m | 1271         | 1271       | 957            | 0.216365067  | 0.006299213 | 0.541392121 | 0.011023622 | 0.941342614 | 0.272727273 | 0.008412198 | 0.455929864  | 0.027143346 | 0.797877262  | -           | -        | -       |
| chr14      | 6771243   | 6771243   | AmelG14 WGA419  | 2.502885.502885.m | 4283         | 4283       | 3921           | 0.216365067  | 0.006299213 | 0.541392121 | 0.011023622 | 0.941342614 | 0.272727273 | 0.008412198 | 0.455929864  | 0.027143346 | 0.797877262  | -           | -        | -       |
| chr1       | 4448160   | 4452081   | XM 395265       | 3922              | 3922         | 2716       | 0.231259561    | 0.009691405  | 0.434318554 | 0.016577404 | 1.256071211 | 0.299337261 | 0.01296296  | 0.9153552   | 0.022592953  | 1.030647634 | XM 395266.3  | -           | -        | -       |
| chrUn      | 402032908 | 40306350  | AmelGUn WGA117  | 2.505842.505842.m | 3443         | 3393       | 1756           | 0.192455055  | 0.010321439 | 1.117175695 | 0.013270422 | 0.346368751 | 0.029669709 | 0.018380241 | 0.837784709  | 0.022953042 | 1.02730886   | -           | -        | -       |
| chr9       | 1361598   | 1368819   | XM 625124       | 7222              | 6822         | 5997       | 0.348431545    | 0.046902821  | 1.546307641 | 0.033577713 | 1.06576406  | 0.379856595 | 0.05189153  | 1.43911086  | 0.037161031  | 1.030589068 | XM 625124.2  | -           | -        | -       |
| chr1       | 17560373  | 17562600  | XM 396943       | 2228              | 2228         | 1955       | 0.267953221    | 0.011674899  | 0.560400696 | 0.031881455 | 1.840796241 | 0.300767263 | 0.013333333 | 0.036410256 | 0.175746986  | XM 396943.1 | -            | -           | -        | -       |
| chrUn      | 28010712  | 28012010  | XM 623460       | 1299              | 1299         | 1049       | 0.250194266    | 0.00385208   | 0.2509654   | 0.020801233 | 1.355231158 | 0.296472831 | 0.004789272 | 0.226212137 | 0.024904215  | 1.157583113 | XM 623460.2  | -           | -        | -       |
|            |           |           |                 |                   |              |            |                |              |             |             |             |             |             |             |              |             |              |             |          |         |

| chromosome | start      | end       | ID              | length            | valid length | without Ns | non-repetitive | nr length | qcContent    | cpaContent  | cpqo/E      | qpcContent  | apco/E      | nrCpGcontent | nrCpGContent | nrCpGO/E     | nrGpCContent | nrGpCO/E    | RefSeqID    | version |   |
|------------|------------|-----------|-----------------|-------------------|--------------|------------|----------------|-----------|--------------|-------------|-------------|-------------|-------------|--------------|--------------|--------------|--------------|-------------|-------------|---------|---|
| chrUn      | 58523349   | 58528872  | XM 623214       | 5524              | 5474         |            | 2946           |           | 0.011878655  | 0.011878655 | 0.072625505 | 0.014254386 | 1.287150606 | 0.304480652  | 0.020826221  | 0.90009969   | 0.024923182  | 1.077168482 | -           | -       |   |
| chrUn      | 76473674   | 76477280  | XM 392743       | 3607              | 3607         |            | 3257           |           | 0.292486831  | 0.013865779 | 0.650357314 | 0.029950083 | 1.404717798 | 0.318391158  | 0.015379883  | 0.608575434  | 0.033220548  | 1.314522896 | XM 392743.3 | -       |   |
| chr1       | 17874981   | 17875977  | XM 623866       | 997               | 997          |            | 766            |           | 0.0272818455 | 0.010506241 | 0.81006575  | 0.02088353  | 1.188096433 | 0.330287206  | 0.0673936857 | 0.330287206  | 0.010905295  | 1.010905295 | -           | -       |   |
| chr1       | 2365467335 | 265471964 | XM 397272       | 2630              | 2630         |            | 2631           |           | 0.197840173  | 0.138128975 | 0.138128975 | 0.01317792  | 1.368432141 | 0.285387257  | 0.021513630  | 1.082883098  | 0.021513630  | 1.063804976 | XM 397272.3 | -       |   |
| chr9       | 23147      | 235751    | XM 623995       | 212606            | 201289       |            | 191980         |           | 0.377407608  | 0.0677988   | 0.906555771 | 0.033412497 | 0.939463217 | 0.388165434  | 0.07077297   | 1.881011295  | 0.034789366  | 0.924635351 | -           | -       |   |
| chr16      | 5501508    | 5507792   | XM 393344       | 6285              | 6033         |            | 5520           |           | 0.346096469  | 0.048250705 | 0.161130662 | 0.031669707 | 1.057595645 | 0.359601449  | 0.052497729  | 1.624194376  | 0.033969119  | 0.054939302 | XM 393344.3 | -       |   |
| chr6       | 3758670    | 3761108   | XM 393387       | 2439              | 2439         |            | 2119           |           | 0.322673227  | 0.02707137  | 1.058151173 | 0.029122331 | 1.138314141 | 0.360075507  | 0.031220435  | 0.978356438  | 0.03358562   | 1.052474349 | XM 393387.3 | -       |   |
| chrUn      | 43063048   | 43064627  | AmelGLn WGA862  | 2.510519.510519.m | 1580         | 1580       |                | 1166      |              | 0.243037975 | 0.012666424 | 0.02279924  | 1.546631054 | 0.32161235   | 0.017256255  | 0.668704981  | 0.030198447  | 1.170233717 | -           | -       |   |
| chr9       | 1644820    | 1687340   | AmelG9 WGA285   | 2.519644.519644.m | 42521        | 40166      |                | 34584     |              | 0.362196883 | 0.059308319 | 1.814185477 | 0.032766477 | 0.020295587  | 0.392030997  | 0.066778906  | 1.767523141  | 0.037487306 | 0.977585573 | -       | - |
| chr11      | 10573401   | 10590803  | XM 397333       | 17403             | 17013        |            | 13529          |           | 0.246870001  | 0.025865616 | 0.169474906 | 0.017694433 | 1.161345499 | 0.289526203  | 0.032210183  | 0.021745584  | 0.037717463  | 1.037717463 | -           | -       |   |
| chrUn      | 201089724  | 201090722 | AmelGLn WGA4529 | 2.503139.503139.m | 999          | 999        |                | 999       |              | 0.252532525 | 0.087330519 | 0.42084168  | 1.598540081 | 0.325325235  | 0.022044088  | 0.837330519  | 0.042084168  | 1.598540081 | -           | -       |   |
| chrUn      | 116273403  | 116278001 | AmelGLn WGA2332 | 2.506973.506973.m | 4599         | 4599       |                | 4128      |              | 0.248967167 | 0.01703841  | 1.154809413 | 0.020878643 | 1.351971996  | 0.019927096  | 1.085220095  | 0.023329283  | 1.270501574 | -           | -       |   |
| chr3       | 3802545    | 3807914   | XM 393289       | 5370              | 5370         |            | 4306           |           | 0.279329629  | 0.018811697 | 0.962723612 | 0.018897951 | 0.977305034 | 0.331398049  | 0.023537637  | 0.860190587  | 0.037706883  | 0.986073025 | XM 393289.3 | -       |   |
| chrUn      | 303397121  | 303397830 | AmelGLn WGA7193 | 2.509010.509010.m | 710          | 710        |                | 620       |              | 0.266197183 | 0.008462623 | 0.478073703 | 0.023977433 | 1.354440159  | 0.296774194  | 0.009724473  | 0.441697686  | 0.025931929 | 1.177860497 | -       | - |
| chrUn      | 19958981   | 19961451  | XM 624930       | 2471              | 2471         |            | 1697           |           | 0.226628895  | 0.008502024 | 0.682191028 | 0.018218623 | 1.461837918 | 0.299941072  | 0.012440758  | 0.573985192  | 0.026658768  | 1.229968268 | XM 624930.2 | -       |   |
| chr2       | 12157882   | 12172226  | AmelG2 WGA88    | 2.503068.503068.m | 14345        | 14345      |                | 10408     |              | 0.237992332 | 0.016662019 | 1.171155992 | 0.01742889  | 1.231334719  | 0.298232129  | 0.022297297  | 1.003656369  | 0.022393822 | 1.008001201 | -       | - |
| chr2       | 4438759    | 4459821   | XM 393419       | 111063            | 110518       |            | 100243         |           | 0.328987133  | 0.047143348 | 1.742455477 | 0.029417087 | 1.087335167 | 0.351535768  | 0.051509396  | 1.667551228  | 0.032727105  | 1.043635302 | XM 393419.3 | -       |   |
| chr1       | 13473733   | 13483123  | AmelG1 WGA38    | 2.500677.500677.m | 9391         | 8593       |                | 8294      |              | 0.366503724 | 0.055413271 | 1.65032945  | 0.033527357 | 0.598518659  | 0.375452134  | 0.057460164  | 1.630682745  | 0.034524384 | 0.979779968 | -       | - |
| chr9       | 4542812    | 6590338   | XM 624901       | 47527             | 47348        |            | 44227          |           | 0.324343161  | 0.041207283 | 1.567020269 | 0.021628011 | 0.822464764 | 0.337124381  | 0.043895977  | 1.54720206   | 0.023078317  | 0.812261153 | XM 624901.2 | -       |   |
| chr3       | 615938     | 618410    | XM 624353       | 2203              | 2202         |            | 1716           |           | 0.321607643  | 0.023160765 | 0.992671154 | 0.034059946 | 1.495214602 | 0.367132867  | 0.029842013  | 0.887620831  | 0.03385313   | 1.034257451 | -           | -       |   |
| chrUn      | 197871198  | 197875251 | AmelGLn WGA4444 | 2.501135.501135.m | 4054         | 4054       |                | 3153      |              | 0.225456339 | 0.008388848 | 0.66781954  | 0.015297311 | 1.217788573  | 0.274976213  | 0.010512902  | 0.561294632  | 0.01943294  | 1.037544623 | -       | - |
| chr1       | 6614463    | 6616556   | XM 625247       | 2094              | 2094         |            | 1524           |           | 0.214899713  | 0.004300048 | 0.37673089  | 0.01290143  | 1.130192669 | 0.270341207  | 0.005944418  | 0.330214404  | 0.017833554  | 0.909643212 | XM 625247.2 | -       |   |
| chrUn      | 42840633   | 42842626  | AmelGLn WGA858  | 2.509016.509016.m | 5664         | 5614       |                | 4648      |              | 0.218204489 | 0.006949394 | 0.587205231 | 0.014967926 | 1.264749728  | 0.274848537  | 0.008202029  | 0.537075915  | 0.017699115 | 1.158953291 | -       | - |
| chrUn      | 25078700   | 25080017  | XM 623918       | 1318              | 1318         |            | 1036           |           | 0.251896813  | 0.012908123 | 0.853884726 | 0.019741838 | 1.305941346 | 0.304054054  | 0.015518914  | 0.0171811452 | 0.023278371  | 1.067717178 | XM 623918.2 | -       |   |
| chr8       | 7243555    | 7260238   | AmelGL8 WGA271  | 2.512127.512127.m | 16684        | 15949      |                | 14450     |              | 0.335444228 | 0.035241738 | 1.252789723 | 0.030036998 | 1.067769177  | 0.353771626  | 0.038056287  | 1.216554099  | 0.032649383 | 1.043710388 | -       | - |
| chr1       | 22226128   | 2226128   | AmelG1 WGA1     | 2.502175.502175.m | 5571         | 5571       |                | 5571      |              | 0.313133349 | 0.020617393 | 1.502010861 | 0.030935138 | 1.368432141  | 0.351760579  | 0.103922866  | 1.554206059  | 0.058295866 | 0.9333275   | -       | - |
| chr3       | 8802302    | 8823090   | XM 624822       | 17589             | 15789        |            | 12011          |           | 0.244269898  | 0.01748417  | 0.91139743  | 0.015264758 | 1.32650594  | 0.35771106   | 0.0244862758 | 1.230598518  | 0.019732441  | 0.991198806 | -           | -       |   |
| chrUn      | 187008692  | 187010800 | XM 623704       | 2109              | 2109         |            | 1207           |           | 0.201041438  | 0.007115579 | 0.719593669 | 0.014075882 | 1.48716583  | 0.293289147  | 0.012531328  | 0.591046786  | 0.02589079   | 1.221496692 | XM 623704.2 | -       |   |
| chr8       | 4582220    | 4584277   | XM 396289       | 2058              | 2058         |            | 1803           |           | 0.290087464  | 0.022848809 | 1.086970941 | 0.021390374 | 1.321131448 | 0.025598219  | 0.993255211  | 0.044852553  | 0.900702021  | 0.3962892   | -           | -       |   |
| chr4       | 1786996    | 1790119   | XM 623763       | 3124              | 3124         |            | 2806           |           | 0.282330346  | 0.010566763 | 0.536885728 | 0.029779059 | 1.513041596 | 0.305060584  | 0.011071429  | 0.481681992  | 0.032857143  | 1.429507848 | XM 623763.2 | -       |   |
| chr1       | 16577095   | 16581689  | XM 392121       | 4595              | 4595         |            | 4448           |           | 0.455712731  | 0.078363082 | 1.511053589 | 0.05245973  | 1.011554555 | 0.460656475  | 0.08080126   | 1.52694214   | 0.054017556  | 1.020796974 | XM 392121.2 | -       |   |
| chr16      | 564535     | 566648    | XM 625259       | 2314              | 2314         |            | 1993           |           | 0.264477096  | 0.020319311 | 1.16803475  | 0.018156788 | 1.043778106 | 0.293527346  | 0.023677582  | 1.102768578  | 0.02150869   | 0.985452771 | XM 625259.2 | -       |   |
| chr9       | 9053357    | 9121776   | XM 396702       | 66798             | 66798        |            | 64724          |           | 0.365359472  | 0.061530631 | 1.492013865 | 0.036603988 | 0.88758489  | 0.041968799  | 0.063186218  | 1.500887178  | 0.037806935  | 0.9833275   | -           | -       |   |
| chr5       | 1458312    | 1471188   | XM 392495       | 1926              | 1926         |            | 1708           |           | 0.294977602  | 0.030241212 | 1.567366254 | 0.024415894 | 1.309337518 | 0.303278689  | 0.01750088   | 1.023078689  | 0.024811219  | 0.9345792   | -           | -       |   |
| chrUn      | 239960461  | 239961883 | XM 625154       | 1423              | 1423         |            | 1083           |           | 0.236821632  | 0.009845288 | 0.714911063 | 0.018284107 | 1.32769197  | 0.293628809  | 0.012999071  | 0.615969132  | 0.024111333  | 1.143942675 | XM 625154.2 | -       |   |
| chr5       | 13236760   | 13238362  | AmelG5 WGA175   | 2.524633.524633.m | 1603         | 1603       |                | 1546      |              | 0.376169682 | 0.025593009 | 0.724177701 | 0.033083645 | 0.936132153  | 0.386804657  | 0.026554404  | 0.710727114  | 0.034326425 | 0.91873705  | -       | - |
| chr2       | 8628969    | 8669769   | XM 392239       | 48001             | 48001        |            | 38993          |           | 0.460748511  | 0.080735294 | 1.521478233 | 0.047941176 | 0.903464306 | 0.465288642  | 0.083489512  | 1.542578633  | 0.049421067  | 0.913119271 | -           | -       |   |
| chr3       | 3291201    | 3295056   | XM 623539       | 3856              | 3856         |            | 2468           |           | 0.223288382  | 0.010376135 | 0.845150834 | 0.018936446 | 1.535647772 | 0.300243112  | 0.015491235  | 0.692715033  | 0.028536486  | 1.126054008 | XM 623539.2 | -       |   |
| chrUn      | 127485444  | 127491556 | AmelGLn WGA2622 | 2.504803.504803.m | 6113         | 6113       |                | 4318      |              | 0.209226239 | 0.008344421 | 0.763868066 | 0.01276178  | 1.168268838  | 0.270995787  | 0.011879804  | 0.648238273  | 0.017073238 | 0.960020132 | -       | - |
| chr10      | 3094623    | 3097367   | XM 623047       | 2745              | 2745         |            | 1847           |           | 0.2247772313 | 0.013483965 | 1.108107949 | 0.0196793   | 1.157791701 | 0.305948588  | 0.017993457  | 0.806567866  | 0.02780807   | 1.246513975 | XM 623047.2 | -       |   |
| chrUn      | 12126128   | 12126128  | AmelG2 WGA2526  | 2.501463.501463.m | 821          | 821        |                | 797       |              | 0.298416565 | 0.01262693  | 0.303305227 | 0.01262693  | 1.31746426   | 0.318195263  | 0.01746426   | 1.260482161  | 0.015850105 | 1.05850105  | -       | - |
| chr10      | 8530026    | 8542176   | XM 393338       | 11251             | 11187        |            | 11787          |           | 0.406139412  | 0.055967078 | 1.358994119 | 0.041069599 | 0.997195577 | 0.41265803   | 0.057659647  | 1.265627606  | 0.042289402  | 0.9949201   | XM 393338.3 | -       |   |
| chrUn      | 211034529  | 211036495 | AmelGLn WGA4788 | 2.502476.502476.m | 1967         | 1967       |                | 1967      |              | 0.456532791 | 0.039165819 | 0.784618545 | 0.079857579 | 1.058619631  | 0.456532791  | 0.039165819  | 0.764418567  | 0.079857579 | 1.058619631 | -       | - |
| chrUn      | 30359211   | 30364028  | XM 624468       | 4818              | 4818         |            | 3949           |           | 0.287462378  | 0.024288977 | 1.176652119 | 0.025326967 | 1.226935459 | 0.325145606  | 0.028186897  | 1.068969367  | 0.029710513  | 1.126751495 | XM 624468.1 | -       |   |
| chr1       | 15140357   | 15171274  | XM 392125       | 30918             | 30868        |            | 27861          |           | 0.328723201  | 0.04503337  | 1.668651121 | 0.030357027 | 1.124838921 | 0.354366319  | 0.049748201  | 1.58622082   | 0.03352518   | 1.068949967 | -           | -       |   |
| chrUn      | 2388608    | 2390919   | XM 624197       | 2312              | 2312         |            | 1431           |           | 0.217560554  | 0.007788836 | 0.696900087 | 0.012981393 | 1.115666811 | 0.289669142  | 0.010884354  | 0.528872774  | 0.019727891  | 0.958581902 | XM 624197.2 | -       |   |
| chr5       | 5340024    |           |                 |                   |              |            |                |           |              |             |             |             |             |              |              |              |              |             |             |         |   |

| chromosome | start     | end       | ID              | lenqth            | valid lenqth | without Ns | non-repetitive | nr lenqth | qcContent   | cpaContent  | cpqo/E      | npCContent  | npCpGContent | npCpG/G/E   | npGrCContent | npGrCpC/E   | RefSeqID    | version     |             |
|------------|-----------|-----------|-----------------|-------------------|--------------|------------|----------------|-----------|-------------|-------------|-------------|-------------|--------------|-------------|--------------|-------------|-------------|-------------|-------------|
| chr12      | 4864338   | 4927400   | XM 624125       | 63063             | 62232        |            | 59121          |           | 0.412553027 | 0.071414797 | 1.678618339 | 0.040030211 | 0.940917705  | 0.419800071 | 0.074239062  | 1.6852484   | 0.041785938 | 0.948533001 | XM 624125.1 |
| chr19      | 19934939  | 19935769  | AmelGUN WGA576  | 2.510836.510836.m | 831          | 831        | 650            |           | 0.217809868 | 0.014457831 | 1.223531184 | 0.004819277 | 0.340483728  | 0.261538462 | 0.017027864  | 1.002546327 | 0.0061915   | 0.364562301 |             |
| chr6       | 7003835   | 7006069   | AmelG6 WGA199   | 2.501091.501091.m | 2335         | 2235       | 1785           |           | 0.320357942 | 0.026857654 | 1.048871992 | 0.034467323 | 1.340661501  | 0.381512605 | 0.033164699  | 0.914418431 | 0.034282743 | 0.193393546 |             |
| chr5       | 12834896  | 12835253  | XM 624063       | 358               | 358          | 17358      | 14637          |           | 0.279352591 | 0.031629891 | 1.62048498  | 0.021144207 | 1.083183786  | 0.028557776 | 0.130087614  | 0.024756819 | 0.101286106 | 0.395207.3  |             |
| chrUn      | 39680531  | 39693024  | XM 624036       | 12494             | 12494        |            | 10928          |           | 0.296333224 | 0.033298647 | 4.99517087  | 0.021291923 | 0.958882583  | 0.037999082 | 0.024323084  | 0.912082229 | 0.024323084 | 0.912082229 |             |
| chr3       | 808065    | 86422     | XM 392257       | 5617              | 5617         |            | 50928          |           | 0.341107353 | 0.054665242 | 1.879269607 | 0.027599715 | 0.948816937  | 0.359311545 | 0.056793952  | 1.759696848 | 0.030044582 | 0.9308765   | XM 392257.3 |
| chr11      | 4590105   | 4592201   | XM 391901       | 2097              | 2097         |            | 1650           |           | 0.227944683 | 0.007156489 | 0.551022677 | 0.016221374 | 1.248984736  | 0.275151515 | 0.009135201  | 0.482802101 | 0.020706456 | 1.09435143  | XM 391901.3 |
| chr5       | 7705927   | 7706911   | AmelG5 WGA162   | 2.508431.508431.m | 985          | 985        | 773            |           | 0.223350254 | 0.005081301 | 0.418648529 | 0.009146341 | 0.753567353  | 0.26778784  | 0.006501951  | 0.370999239 | 0.011703511 | 0.66779863  |             |
| chr1       | 10876566  | 10878148  | XM 396068       | 1583              | 1583         |            | 1526           |           | 0.286892356 | 0.010745891 | 0.521254563 | 0.022756005 | 1.103833193  | 0.296854522 | 0.011154856  | 0.511843224 | 0.023622047 | 1.08390334  | XM 396068.3 |
| chrUn      | 27614165  | 27616676  | XM 624319       | 2512              | 2512         |            | 1802           |           | 0.226512739 | 0.005973716 | 0.471871789 | 0.019514138 | 1.541447843  | 0.279689234 | 0.006128134  | 0.318490721 | 0.067240947 | 0.93877694  | XM 624319.2 |
| chrUn      | 24525189  | 24527459  | AmelGUN WGA623  | 2.514180.514180.m | 2271         | 2271       | 1162           |           | 0.173051519 | 0.003964758 | 1.535989619 | 0.00969163  | 1.30196846   | 0.266781411 | 0.006950478  | 0.39384116  | 0.018245004 | 1.033833046 |             |
| chr12      | 8001122   | 8140327   | XM 393874       | 139206            | 136528       |            | 131150         |           | 0.37751963  | 0.0653773   | 1.829143974 | 0.034221089 | 0.960593632  | 0.387678231 | 0.067605935  | 1.800179427 | 0.03581268  | 0.947441464 | XM 393874.2 |
| chr4       | 547636    | 550055    | AmelG4 WGA127   | 2.505749.505749.m | 2420         | 2420       | 2225           |           | 0.285123967 | 0.032658123 | 0.68050406  | 0.020669698 | 1.063325346  | 0.305617978 | 0.035585586  | 1.593455889 | 0.025225253 | 0.108615385 |             |
| chr6       | 1048306   | 1050806   | XM 623906       | 2501              | 2501         |            | 1648           |           | 0.229508197 | 0.0064      | 0.488379831 | 0.0172      | 1.312520797  | 0.313713592 | 0.00976205   | 0.398197572 | 0.025625381 | 1.045268626 | XM 623906.2 |
| chrUn      | 19664770  | 19665448  | AmelGUN WGA573  | 2.508164.508164.m | 679          | 679        | 582            |           | 0.310751105 | 0.028023599 | 1.180126783 | 0.022123894 | 0.931679039  | 0.032758621 | 0.10080665   | 0.025862069 | 0.869057882 |             |             |
| chr5       | 7949239   | 7952115   | AmelG5 WGA163   | 2.504925.504925.m | 2877         | 2877       | 2004           |           | 0.222801529 | 0.010431154 | 0.841815944 | 0.013212796 | 1.066300195  | 0.270958084 | 0.014529058  | 0.791579795 | 0.019038076 | 1.03724249  |             |
| chr2       | 71581     | 74209     | AmelG2 WGA65    | 2.505064.505064.m | 2629         | 2629       | 2629           |           | 0.413465196 | 0.068873668 | 1.611519841 | 0.032678645 | 0.36921906   | 0.413465196 | 0.032678645  | 1.611519841 | 0.032678645 | 1.611519841 |             |
| chrUn      | 14205270  | 14209981  | AmelGUN WGA526  | 2.503651.503651.m | 4712         | 4712       | 3646           |           | 0.254244482 | 0.019104224 | 1.183784244 | 0.020590108 | 1.275856352  | 0.316236972 | 0.024195766  | 0.968771904 | 0.026395381 | 1.056842077 |             |
| chr12      | 8582122   | 8586257   | XM 391931       | 1062              | 1062         |            | 1033           |           | 0.360640041 | 0.058435438 | 1.798647957 | 0.025447691 | 0.783282175  | 0.366892546 | 0.06013579   | 1.787571468 | 0.026188167 | 0.778458542 |             |
| chr13      | 8326910   | 8329828   | AmelG13 WGA405  | 2.503215.503215.m | 2919         | 2919       | 2483           |           | 0.322370675 | 0.03564085  | 0.920143976 | 0.028101439 | 0.586567777  | 0.369311317 | 0.042020202  | 1.236477105 | 0.03313131  | 0.974914664 |             |
| chr11      | 6374886   | 6377786   | XM 623952       | 2901              | 2851         |            | 2103           |           | 0.227639425 | 0.017550018 | 1.358057856 | 0.016497016 | 1.273782331  | 0.285306705 | 0.022922636  | 1.12642063  | 0.021489971 | 1.056019341 | XM 623952.2 |
| chrUn      | 55074541  | 55075691  | AmelGUN WGA1060 | 2.501448.501448.m | 1151         | 1151       | 914            |           | 0.269331017 | 0.017391304 | 0.976934252 | 0.026956522 | 1.51424809   | 0.31619256  | 0.021978022  | 0.90320502  | 0.032967033 | 1.35480753  |             |
| chr4       | 7868619   | 7872015   | AmelG4 WGA141   | 2.505920.505920.m | 1597         | 1597       | 1490           |           | 0.262993112 | 0.003759398 | 0.222919806 | 0.020050125 | 1.18890563   | 0.264150943 | 0.00377596   | 0.221943312 | 0.02138452  | 1.183697662 |             |
| chr5       | 2217983   | 2242396   | XM 623067       | 6414              | 6414         |            | 5529           |           | 0.235734331 | 0.012006861 | 0.827110926 | 0.020739124 | 1.502918873  | 0.309550689 | 0.016802906  | 0.707304018 | 0.028610354 | 1.204328464 |             |
| chr8       | 6459573   | 6465519   | XM 393491       | 5947              | 5897         |            | 4779           |           | 0.31897575  | 0.020186599 | 0.805763408 | 0.026802375 | 1.069837129  | 0.36702233  | 0.023514592  | 0.705684041 | 0.032542515 | 0.976616306 | XM 393491.3 |
| chr5       | 13016382  | 13016735  | AmelG5 WGA159   | 2.507595.507595.m | 1389         | 1389       | 1283           |           | 0.279279279 | 0.016729279 | 1.55541554  | 0.028519635 | 1.300784015  | 0.20859147  | 0.12085197   | 0.500594747 | 0.034082928 | 0.94346083  | XM 393460.3 |
| chr5       | 4833167   | 4847055   | AmelG5 WGA159   | 2.507595.507595.m | 1389         | 1389       | 1283           |           | 0.279279279 | 0.016729279 | 1.55541554  | 0.028519635 | 1.300784015  | 0.20859147  | 0.12085197   | 0.500594747 | 0.034082928 | 0.94346083  |             |
| chr1       | 21691357  | 21694986  | XM 624547       | 3630              | 3630         |            | 3405           |           | 0.427493388 | 0.065858363 | 1.468182768 | 0.044809281 | 0.982883861  | 0.437004405 | 0.069411765  | 1.458958911 | 0.04582353  | 0.964396588 | XM 624547.2 |
| chr14      | 1633005   | 1636462   | AmelG14 WGA410  | 2.505721.505721.m | 3458         | 3458       | 2842           |           | 0.277038751 | 0.026323402 | 1.372906532 | 0.025158992 | 0.323011963  | 0.312558992 | 0.031870372  | 1.218322824 | 0.030698659 | 0.971721064 |             |
| chrUn      | 129424178 | 129425907 | AmelGUN WGA2672 | 2.506306.506306.m | 1730         | 1730       | 1730           |           | 0.453757225 | 0.042799306 | 0.835577579 | 0.065355697 | 1.275949546  | 0.453757225 | 0.042799306  | 0.835577579 | 0.065355697 | 1.275949546 |             |
| chr15      | 5034558   | 5045900   | AmelG15 WGA436  | 2.512741.512741.m | 11343        | 11343      | 10423          |           | 0.466807723 | 0.073091166 | 1.346146017 | 0.049462176 | 0.910962504  | 0.463782021 | 0.075732821  | 1.413597376 | 0.050264296 | 0.938212472 |             |
| chrUn      | 115015785 | 115013477 | XM 395639       | 1919              | 1919         |            | 15360          |           | 0.254975705 | 0.016143357 | 1.002580266 | 0.017710673 | 1.099918156  | 0.300976563 | 0.019797452  | 0.866372859 | 0.021626919 | 0.965323297 | XM 395639.3 |
| chr11      | 1992007   | 2004684   | XM 393410       | 12678             | 12678        |            | 11205          |           | 0.311642215 | 0.037784965 | 0.87784965  | 0.027530173 | 1.133852635  | 0.340045069 | 0.042058166  | 1.463511719 | 0.030782998 | 1.071166024 | XM 393410.3 |
| chr11      | 11603162  | 11603782  | XM 391931       | 1963              | 1963         |            | 1382           |           | 0.234335201 | 0.017021227 | 0.46010957  | 0.013981653 | 1.199373543  | 0.304845826 | 0.043478528  | 0.943478528 | 0.043478528 | 0.943478528 |             |
| chr13      | 2774006   | 2794320   | XM 393918       | 20315             | 20315        |            | 19676          |           | 0.413044548 | 0.067638082 | 1.586523205 | 0.03692035  | 0.866006116  | 0.416141492 | 0.06948118   | 1.60530671  | 0.038046796 | 0.879040571 | XM 393918.3 |
| chr7       | 7738220   | 7748370   | AmelG7 WGA241   | 2.504774.504774.m | 10151        | 10151      | 9331           |           | 0.32814501  | 0.029458128 | 1.098617802 | 0.03270936  | 1.19869934   | 0.350980602 | 0.031870372  | 1.039171827 | 0.03562614  | 0.816133153 |             |
| chr11      | 4302641   | 4307671   | XM 396203       | 5031              | 5031         |            | 3573           |           | 0.258000398 | 0.013320008 | 0.826381977 | 0.020675944 | 1.282742173  | 0.32297789  | 0.018284017  | 0.71859632  | 0.027566807 | 1.083422144 | XM 396203.3 |
| chr4       | 2961243   | 2973097   | XM 393195       | 11855             | 11855        |            | 11531          |           | 0.378658794 | 0.05812384  | 1.31139116  | 0.032225409 | 0.90434711   | 0.387737404 | 0.059706674  | 1.597542848 | 0.033151089 | 0.887007802 |             |
| chr10      | 3007796   | 3009287   | AmelG10 WGA316  | 2.504195.504195.m | 1492         | 1492       | 1150           |           | 0.242718447 | 0.008333323 | 0.595386223 | 0.013888889 | 0.992305372  | 0.287826087 | 0.01408951   | 0.532365401 | 0.016608392 | 0.842911885 |             |
| chr5       | 9316302   | 9317467   | XM 394580       | 1166              | 1166         |            | 991            |           | 0.292452843 | 0.003433476 | 1.036831093 | 0.027467811 | 1.33048742   | 0.336024218 | 0.004052685  | 0.148898797 | 0.032421479 | 1.91190376  | XM 394580.2 |
| chr6       | 2307881   | 2307983   | XM 396383       | 1898              | 1898         |            | 1736           |           | 0.232786177 | 0.00914253  | 1.08914253  | 0.00914253  | 1.08914253   | 0.00914253  | 0.00914253   | 1.08914253  | 0.00914253  | 1.08914253  | XM 396383.2 |
| chr10      | 6643308   | 6648985   | AmelG10 WGA324  | 2.503863.503863.m | 5678         | 5678       | 3936           |           | 0.213807675 | 0.008279021 | 1.730202221 | 0.016029593 | 1.413795789  | 0.279979675 | 0.0149719    | 0.591746062 | 0.022994379 | 1.183942192 |             |
| chr1       | 6519532   | 6538238   | AmelG1 WGA18    | 2.502341.502341.m | 18707        | 18239      | 15830          |           | 0.325949888 | 0.045018369 | 1.698658083 | 0.031803476 | 1.200025513  | 0.362476311 | 0.051701197  | 1.576002801 | 0.036304885 | 0.871016821 |             |
| chr2       | 6808332   | 6824689   | AmelG2 WGA76    | 2.507240.507240.m | 16358        | 16307      | 11634          |           | 0.242165991 | 0.012512267 | 0.874365392 | 0.018400393 | 1.285831458  | 0.307374936 | 0.017356014  | 0.753010185 | 0.025127364 | 1.090178924 |             |
| chr7       | 6424458   | 6424900   | AmelG7 WGA234   | 2.505775.505775.m | 443          | 443        | 373            |           | 0.261704289 | 0           | 0           | 0.004524887 | 0.01113206   | 0.252010724 | 0            | 0           | 0.005390836 | 0.363206568 |             |
| chr6       | 12940761  | 12941912  | XM 394618       | 1152              | 1152         |            | 780            |           | 0.249131944 | 0.009556907 | 0.672125573 | 0.014769765 | 1.338739521  | 0.314102564 | 0.014211886  | 0.614273347 | 0.021963824 | 0.949331536 | XM 394618.2 |
| chr11      | 805912    | 807061    | AmelG11 WGA348  | 2.514721.514721.m | 1150         | 1150       | 1126           |           | 0.305686957 | 0.087032202 | 0.125724448 | 0.057441253 | 1.030230136  | 0.57300136  | 0.0279077    |             |             |             |             |

| chromosome | start     | end       | ID               | length            | valid length without Ns | non-repetitive nr length | qcContent   | cpaContent  | cpoq/E      | qpcContent  | apcqo/E     | nrGcContent | nrCpGContent | nrCpGGO/E   | nrGpCCContent | nrGpCCo/E    | RefSeqID    | version |
|------------|-----------|-----------|------------------|-------------------|-------------------------|--------------------------|-------------|-------------|-------------|-------------|-------------|-------------|--------------|-------------|---------------|--------------|-------------|---------|
| chrUn      | 100629062 | 100631008 | XM 395909        | 1947              | 1947                    | 1433                     | 0.024019517 | 0.01336074  | 0.902816637 | 0.020554985 | 0.020848673 | 0.309141661 | 0.018258427  | 0.779976678 | 0.028089888   | 1.199964121  | XM 395909.3 |         |
| chrUn      | 285890200 | 285902829 | XM 397413        | 12630             | 12630                   | 9014                     | 0.265795724 | 0.031039671 | 1.757758306 | 0.02358936  | 1.322802807 | 0.338473486 | 0.043211939  | 1.509195535 | 0.032297583   | 1.128006972  | XM 397413.2 |         |
| chr6       | 6167100   | 6234165   | XM 623315        | 67066             | 66792                   | 58750                    | 0.302955444 | 0.037086495 | 1.675406059 | 0.025603018 | 1.158844185 | 0.30093617  | 0.041701503  | 1.531041392 | 0.028682581   | 1.053060794  | -           |         |
| chr1       | 6366093   | 6371121   | XM 392500        | 5179              | 4500                    | 4500                     | 0.287121066 | 0.014870606 | 0.722456499 | 0.024913094 | 1.20346184  | 0.320222222 | 0.017153041  | 0.670121293 | 0.028514146   | 1.114285205  | XM 392900.3 |         |
| chr1       | 15942247  | 15943160  | AmelG1. WGA45    | 2.500846.500846.m | 914                     | 864                      | 0.11990741  | 0.017612012 | 0.695535269 | 0.032482599 | 1.770453412 | 0.312616162 | 0.014945652  | 0.620770565 | 0.038043478   | 1.580143257  | -           |         |
| chrUn      | 2191966   | 2196135   | AmelGUn. WGA459  | 5.004476.504476.m | 4188                    | 4188                     | 0.495224451 | 0.097683305 | 1.604514982 | 0.03940769  | 0.64729882  | 0.49540841  | 0.098646035  | 1.616383153 | 0.03993617    | 0.653684363  | -           |         |
| chr2       | 77521     | 80226     | XM 392194        | 2706              | 2706                    | 2539                     | 0.264227642 | 0.020332717 | 1.170884743 | 0.021072089 | 1.21346237  | 0.278456085 | 0.021687697  | 1.124219578 | 0.022476341   | 1.16510029   | XM 392194.3 |         |
| chrUn      | 17388232  | 17402455  | XM 397437        | 14224             | 13917                   | 11488                    | 0.283035137 | 0.039169182 | 1.965517011 | 0.022710939 | 1.139639221 | 0.326688719 | 0.04674122   | 1.759700166 | 0.027345798   | 1.029506826  | XM 397437.3 |         |
| chr3       | 8372186   | 8373539   | XM 394428        | 1354              | 1354                    | 1108                     | 0.231905465 | 0.003695492 | 0.279866313 | 0.019955654 | 1.511278088 | 0.273465704 | 0.004537205  | 0.249760709 | 0.024500977   | 1.34870783   | XM 394428.1 |         |
| chr11      | 922988    | 924766    | XM 393078        | 4479              | 3803                    | 3213                     | 0.257165396 | 0.019468561 | 1.187132736 | 0.021047093 | 1.283386741 | 0.29318394  | 0.022485946  | 1.056907558 | 0.024045743   | 1.1303703916 | XM 393078.3 |         |
| chr5       | 12187896  | 12275552  | XM 624921        | 87757             | 86229                   | 78840                    | 0.378179035 | 0.069086692 | 1.932233139 | 0.037715258 | 1.054829987 | 0.39970827  | 0.07417338   | 1.857045143 | 0.040396981   | 1.014008007  | XM 624921.2 |         |
| chr11      | 40759875  | 40784747  | AmelG11. WGA355  | 2.513554.513554.m | 2491                    | 2491                     | 0.285828984 | 0.031165908 | 1.569419896 | 0.019678715 | 0.973437657 | 0.310391978 | 0.035208048  | 1.482753501 | 0.021947874   | 1.923413871  | -           |         |
| chrUn      | 93540894  | 93550594  | AmelGUn. WGA1789 | 2.501125.501125.m | 1511                    | 1461                     | 0.325119701 | 0.017820245 | 0.674339862 | 0.040438657 | 1.352728918 | 0.361801242 | 0.020265004  | 0.61998168  | 0.040265004   | 1.383036056  | -           |         |
| chr1       | 17916225  | 18002498  | XM 394158        | 86274             | 85853                   | 82752                    | 0.433112413 | 0.076318272 | 1.628370396 | 0.043284295 | 0.923538521 | 0.438321732 | 0.078715967  | 1.63951603  | 0.044631518   | 0.92959652   | XM 394158.2 |         |
| chrUn      | 2803799   | 2812436   | AmelGUn. WGA461  | 2.505646.505646.m | 8638                    | 8135                     | 0.26425799  | 0.008729866 | 0.699076172 | 0.019427026 | 1.555690637 | 0.271229006 | 0.011046236  | 0.606354497 | 0.024143917   | 1.325317687  | -           |         |
| chr1       | 12260139  | 12261639  | XM 623178        | 1501              | 1501                    | 1477                     | 0.306462358 | 0.028       | 1.227817357 | 0.025333333 | 1.110882371 | 0.311442112 | 0.028474576  | 1.209017573 | 0.025762712   | 1.093873043  | XM 623178.2 |         |
| chrUn      | 115121476 | 115122550 | AmelGUn. WGA2303 | 2.505637.505637.m | 1075                    | 1075                     | 0.342325581 | 0.023277467 | 0.796896056 | 0.029795158 | 1.020026952 | 0.342325581 | 0.023277467  | 0.796896056 | 0.029795158   | 1.020026952  | -           |         |
| chr8       | 3111730   | 3113205   | XM 397179        | 1476              | 1476                    | 1166                     | 0.264905149 | 0.012881356 | 1.742878486 | 0.020339983 | 1.159401861 | 0.310463122 | 0.015477214  | 0.642370769 | 0.024075666   | 0.999243419  | XM 397179.3 |         |
| chrUn      | 33132264  | 33148784  | AmelGUn. WGA724  | 2.511014.511014.m | 16521                   | 15679                    | 0.253396263 | 0.026025388 | 1.622323813 | 0.018562225 | 1.157098602 | 0.291281639 | 0.031139077  | 1.468048267 | 0.02250726    | 1.061102245  | -           |         |
| chrUn      | 92067495  | 92073732  | XM 392805        | 6238              | 6238                    | 6238                     | 0.243505734 | 0.014109347 | 0.960544757 | 0.021645022 | 1.473562959 | 0.308432118 | 0.019779726  | 0.84289438  | 0.029894358   | 1.273920716  | XM 392805.3 |         |
| chr15      | 1532267   | 1535548   | AmelG15. WGA427  | 2.510402.510402.m | 3282                    | 3282                     | 0.384216991 | 0.059128315 | 1.602317703 | 0.035964465 | 1.074605613 | 0.39238927  | 0.060568217  | 1.573656918 | 0.03640462    | 0.957172765  | -           |         |
| chrUn      | 5881758   | 5929628   | AmelGUn. WGA474  | 2.505147.505147.m | 47871                   | 46220                    | 0.30642579  | 0.035832522 | 1.531636442 | 0.025987234 | 1.119806381 | 0.34431752  | 0.041680425  | 1.411498044 | 0.030252593   | 1.023572622  | -           |         |
| chr3       | 1743829   | 1762977   | XM 392269        | 19149             | 19149                   | 17392                    | 0.364509896 | 0.053634844 | 1.619588885 | 0.032953833 | 0.995093073 | 0.388166973 | 0.058654068  | 1.561935353 | 0.036241069   | 0.960508579  | XM 392269.3 |         |
| chrUn      | 98357256  | 98364237  | AmelGUn. WGA1888 | 2.502295.502295.m | 6982                    | 6982                     | 0.212689774 | 0.008738003 | 0.775304249 | 0.012605464 | 1.118471704 | 0.259354583 | 0.011720302  | 0.699076722 | 0.016289233   | 0.957159816  | -           |         |
| chrUn      | 26944678  | 26949774  | XM 625004        | 5097              | 4721                    | 2833                     | 0.19805126  | 0.007416826 | 0.757536316 | 0.014049833 | 1.471748443 | 0.285563007 | 0.01208674   | 0.594258973 | 0.023462496   | 1.153561535  | -           |         |
| chr1       | 1004365   | 1007800   | XM 620015        | 3333              | 3333                    | 3333                     | 0.204351393 | 0.014212698 | 0.754546382 | 0.014212698 | 1.332372552 | 0.049754972 | 0.01732058   | 0.332372552 | 0.020972972   | 1.047297297  | XM 623780.1 |         |
| chrUn      | 294813604 | 294814336 | AmelGUn. WGA6972 | 2.501327.501327.m | 733                     | 733                      | 0.26432564  | 0.024590162 | 0.765027481 | 0.036885242 | 1.47541222  | 0.36425864  | 0.024590164  | 0.765027481 | 0.023685246   | 1.147541221  | -           |         |
| chrUn      | 24291791  | 24294670  | XM 624814        | 2880              | 2619                    | 1353                     | 0.187857961 | 0.008788689 | 1.004934988 | 0.016048911 | 1.835098675 | 0.284552846 | 0.013392857  | 0.671627351 | 0.026785714   | 1.343254702  | XM 624814.2 |         |
| chr1       | 22453819  | 22459594  | XM 392908        | 2136              | 2136                    | 1655                     | 0.242977528 | 0.004215457 | 0.288394125 | 0.020608899 | 1.020962835 | 0.290030211 | 0.005451242  | 0.262543075 | 0.026044821   | 1.04337247   | XM 392908.3 |         |
| chr16      | 798482    | 800543    | XM 395515        | 2062              | 2062                    | 2055                     | 0.31288807  | 0.005373215 | 0.223075312 | 0.02862688  | 1.196494855 | 0.314355231 | 0.005355404  | 0.222318392 | 0.02872444    | 1.19243501   | XM 395515.2 |         |
| chr1       | 15939249  | 15941497  | AmelG1. WGA45    | 2.500679.500679.m | 2249                    | 1955                     | 0.228644501 | 0.010240655 | 0.69007731  | 0.017409114 | 1.336213142 | 0.317720053 | 0.014925373  | 0.592996834 | 0.025923016   | 1.029941869  | -           |         |
| chr4       | 855391    | 863784    | XM 623566        | 8394              | 8344                    | 7606                     | 0.320469799 | 0.039678734 | 1.547006968 | 0.027331575 | 1.065613931 | 0.324492769 | 0.043083004  | 1.470780384 | 0.029907773   | 1.02100045   | XM 623566.2 |         |
| chr9       | 6778724   | 6788442   | AmelG9. WGA297   | 2.511464.511464.m | 9719                    | 9719                     | 0.204239119 | 0.007408932 | 0.719050151 | 0.017081704 | 1.657810071 | 0.288962109 | 0.015312688  | 0.533152688 | 0.026556017   | 1.292491801  | -           |         |
| chrUn      | 7522779   | 7560292   | AmelGUn. WGA510  | 2.505653.505653.m | 35243                   | 35243                    | 0.282317919 | 0.074073982 | 1.574209154 | 0.017420919 | 1.017343903 | 0.314892812 | 0.014092864  | 0.278922802 | 0.012669181   | 1.047745489  | -           |         |
| chr3       | 7684677   | 7687155   | XM 623611        | 2479              | 2479                    | 1577                     | 0.211778943 | 0.005246166 | 0.496000021 | 0.017756255 | 1.678769504 | 0.303741281 | 0.008301405  | 0.383593543 | 0.028097063   | 1.298316606  | XM 623611.2 |         |
| chrUn      | 11984518  | 11986856  | XM 392990        | 2439              | 2439                    | 1732                     | 0.265070543 | 0.02352438  | 1.34871755  | 0.02266948  | 1.299673276 | 0.330831409 | 0.031884508  | 0.029565217 | 0.090554665   | 1.03299903   | XM 392990.3 |         |
| chr1       | 90416     | 92175     | AmelG1. WGA1     | 2.501507.501507.m | 1760                    | 1760                     | 0.323295455 | 0.047754406 | 1.89719184  | 0.023877203 | 1.494895952 | 0.328332372 | 0.048526863  | 1.869182944 | 0.024263342   | 0.934591472  | -           |         |
| chr3       | 105194    | 111792    | XM 394384        | 6599              | 6599                    | 5754                     | 0.276253978 | 0.032130949 | 1.698346845 | 0.022582601 | 1.193649434 | 0.30962461  | 0.0236778804 | 1.604455249 | 0.025797455   | 1.125468054  | XM 394384.3 |         |
| chrUn      | 258703948 | 258703948 | AmelGUn. WGA6029 | 2.512508.512508.m | 1199                    | 1199                     | 0.281067556 | 0.019198664 | 0.97231097  | 0.022537563 | 1.41408853  | 0.319713994 | 0.023655574  | 0.922262641 | 0.026639344   | 1.042557769  | -           |         |
| chrUn      | 167870154 | 167871353 | XM 396928        | 1200              | 1200                    | 1018                     | 0.298333333 | 0.014178482 | 0.814270327 | 0.022518766 | 1.293252872 | 0.308447937 | 0.016748768  | 0.47099858  | 0.026600985   | 1.176880098  | XM 396928.2 |         |
| chr15      | 26087     | 261068    | XM 392068        | 2094              | 2094                    | 1978                     | 0.314295257 | 0.029429648 | 1.522429648 | 0.029429648 | 1.522429648 | 0.314295257 | 0.029429648  | 1.522429648 | 0.029429648   | 1.522429648  | XM 392068.3 |         |
| chr16      | 465268    | 501128    | XM 394135        | 34859             | 33174                   | 31829                    | 0.14286914  | 0.07078899  | 1.511350123 | 0.042208066 | 1.90114573  | 0.437305602 | 0.072313979  | 1.513234225 | 0.043532964   | 1.019086873  | XM 394135.2 |         |
| chr11      | 473836    | 477855    | XM 396547        | 4020              | 4020                    | 3810                     | 0.312189055 | 0.027121174 | 1.116472204 | 0.028365265 | 1.167686525 | 0.330414692 | 0.028120894  | 0.103519272 | 0.029697766   | 1.137316614  | XM 396547.2 |         |
| chrUn      | 5742824   | 5744574   | AmelGUn. WGA473  | 2.503644.503644.m | 1751                    | 1751                     | 0.303826385 | 0.021714286 | 0.944782972 | 0.025142857 | 1.093959231 | 0.332065906 | 0.024142313  | 0.879473137 | 0.027954257   | 1.018337316  | -           |         |
| chr4       | 1435845   | 1448321   | XM 393282        | 12477             | 12477                   | 11016                    | 0.33397451  | 0.036550176 | 1.312670091 | 0.027733248 | 0.996017218 | 0.349854757 | 0.039188943  | 1.282696889 | 0.029823604   | 0.976159117  | XM 393282.3 |         |
| chrUn      | 1770388   | 1834731   | XM 394760        | 64344             | 64344                   | 57335                    | 0.365799453 | 0.05820369  | 1.741837978 | 0.035357382 | 1.051825875 | 0.392116508 | 0.064206552  | 1.672158023 | 0.038807118   | 1.010669973  | -           |         |
| chr2       | 2773076   | 2774404   | XM 623728        | 1329              | 1329                    | 996                      | 0.275395034 | 0.016566265 | 0.830036931 | 0.018072289 | 0.985185743 | 0.34437751  | 0.022222222  | 0.769290899 | 0.024242424   | 0.839626435  | XM 623728.2 |         |
| chr5       | 13031062  | 13039279  | AmelG5. WGA175   | 2.520959.520959.m | 8218                    | 8168                     | 0.386018609 | 0.052902278 | 1.426730503 | 0.039554249 | 1.06674526  | 0.404574234 | 0.055915092  | 1.371364    |               |              |             |         |

| chromosome | start     | end       | ID                                | length | valid length | without Ns | nr length | qcContent   | cpaContent  | cpqQ/e      | apcContent  | apcD/E      | nrCpContent | nrCpGContent | nrCpGQ/E     | nrGpCContent | nrGpCQ/E    | RefSeqID    | version |
|------------|-----------|-----------|-----------------------------------|--------|--------------|------------|-----------|-------------|-------------|-------------|-------------|-------------|-------------|--------------|--------------|--------------|-------------|-------------|---------|
| chrUn      | 60186853  | 60193285  | XM 623081                         | 6433   | 6433         |            | 4042      | 0.209699984 | 0.014925373 | 0.367941778 | 0.017257463 | 0.58168268  | 0.283523008 | 0.021668742  | 0.1096064041 | 0.026650062  | 1.341317614 | XM 623081.2 |         |
| chr15      | 4165332   | 4169144   | XM 392081                         | 3813   | 3813         |            | 3307      | 0.286224495 | 0.013378804 | 0.649679404 | 0.025183631 | 0.22925936  | 0.32446326  | 0.015468608  | 0.592575826  | 0.029117379  | 1.115436849 | XM 392081.3 |         |
| chrUn      | 318548009 | 318550381 | AmelGUn WGA5789 2.504671.504671.m | 2373   | 2371         |            | 2335      | 0.460443399 | 0.079391892 | 1.501401833 | 0.03918919  | 0.820562716 | 0.463382398 | 0.080652081  | 0.503438776  | 0.044616045  | 0.831689536 | -           |         |
| chrUn      | 70594351  | 70597496  | AmelGUn WGA1328 2.504626.504626.m | 3146   | 3146         |            | 3146      | 0.318181818 | 0.025437202 | 1.012678697 | 0.025437202 | 1.012678697 | 0.318181818 | 0.025437202  | 1.012678697  | 0.025437202  | 1.012678697 | XM 393709.3 |         |
| chr7       | 6432444   | 6435138   | XM 625265                         | 2695   | 2693         |            | 2489      | 0.242480505 | 0.014126394 | 0.954043655 | 0.015613383 | 0.098679829 | 0.259541985 | 0.014913341  | 0.917213061  | 0.016298658  | 1.401160772 | -           |         |
| chr4       | 6675775   | 6680739   | XM 394503                         | 4965   | 4965         |            | 3663      | 0.255387714 | 0.024979855 | 1.541946451 | 0.01813054  | 1.119154382 | 0.038045318 | 0.02316886   | 0.02412807   | 0.962339528  | XM 394503.3 |             |         |
| chr11      | 4283221   | 4287267   | XM 625098                         | 4047   | 4047         |            | 2855      | 0.231282431 | 0.007661888 | 0.584930234 | 0.017795353 | 1.358547639 | 0.29737303  | 0.010915493  | 0.50432754   | 0.024295775  | 1.122535493 | XM 625098.2 |         |
| chrUn      | 157104424 | 157105309 | AmelGUn WGA3395 2.505306.505306.m | 886    | 886          |            | 886       | 0.376975169 | 0.023728814 | 0.677617364 | 0.050847458 | 1.452037209 | 0.376975169 | 0.023728814  | 0.677617364  | 0.050847458  | 1.452037209 | -           |         |
| chr5       | 13022329  | 13024269  | XM 393586                         | 1941   | 1941         |            | 1713      | 0.297784647 | 0.016494845 | 0.75785386  | 0.030927835 | 1.420975987 | 0.327495622 | 0.018149883  | 0.692801906  | 0.035128806  | 1.340906915 | XM 393586.3 |         |
| chr10      | 6261879   | 6267190   | XM 393709                         | 5312   | 5312         |            | 3569      | 0.232868976 | 0.013933346 | 1.03026368  | 0.017510827 | 1.294794235 | 0.310731297 | 0.02056338   | 0.853057884  | 0.0267197183 | 1.06727373  | XM 393709.3 |         |
| chr2       | 2321621   | 2324259   | XM 394316                         | 2639   | 2589         |            | 2168      | 0.319428351 | 0.021646695 | 0.852102928 | 0.025898724 | 1.019480289 | 0.369464945 | 0.025925926  | 0.764438794  | 0.031018519  | 0.914596414 | XM 394316.3 |         |
| chr2       | 6036673   | 6037359   | AmelG2 WGA75 2.505569.505569.m    | 687    | 687          |            | 494       | 0.240174672 | 0.00718663  | 0.558805602 | 0.026239067 | 2.011700169 | 0.309716599 | 0.010183299  | 0.477718502  | 0.034623218  | 1.624242908 | -           |         |
| chr2       | 5030569   | 5032289   | XM 623403                         | 1721   | 1721         |            | 1393      | 0.239976757 | 0.002906977 | 0.86241549  | 0.019767442 | 1.248996411 | 0.003604933 | 0.180510161  | 0.003543338  | 1.227469098  | XM 623403.2 |             |         |
| chrUn      | 1919623   | 1921109   | XM 396502                         | 1487   | 1487         |            | 960       | 0.209145931 | 0.003364738 | 0.31368595  | 0.022207268 | 2.070327271 | 0.292708333 | 0.005252101  | 0.250017362  | 0.036313445  | 1.600111119 | XM 396502.3 |         |
| chr11      | 10606194  | 10609718  | NM 001011610.1                    | 3525   | 3525         |            | 2900      | 0.277730496 | 0.027956887 | 1.546310498 | 0.02014756  | 1.045600432 | 0.316895552 | 0.035257518  | 1.404835066  | 0.024196336  | 0.964102496 | -           |         |
| chr9       | 1281314   | 1286310   | XM 625050                         | 4997   | 4997         |            | 4148      | 0.245147088 | 0.016413131 | 0.094191567 | 0.01501201  | 1.08079469  | 0.281099325 | 0.019109821  | 0.970122697  | 0.017900339  | 1.980722527 | XM 625050.2 |         |
| chrUn      | 211306654 | 211307965 | AmelGUn WGA4795 2.503645.503645.m | 1312   | 1312         |            | 1312      | 0.362042683 | 0.022120519 | 1.084595926 | 0.041952708 | 1.296406756 | 0.362042683 | 0.022120519  | 1.084595926  | 0.041952708  | 1.96406756  | -           |         |
| chrUn      | 1924765   | 1927014   | XM 393241                         | 2250   | 2250         |            | 1772      | 0.291111111 | 0.032458871 | 1.532063777 | 0.024010671 | 1.133307451 | 0.34537246  | 0.041336353  | 1.386230008  | 0.030011325  | 1.00640965  | XM 393241.3 |         |
| chrUn      | 179034550 | 179036062 | XM 395826                         | 1513   | 1513         |            | 1142      | 0.224058163 | 0.010582011 | 0.851219713 | 0.015873016 | 1.276829569 | 0.27934501  | 0.013204225  | 0.684221049  | 0.021126761  | 1.094753678 | XM 395826.3 |         |
| chrUn      | 2651630   | 2653985   | AmelGUn WGA460 2.503809.503809.m  | 2356   | 2356         |            | 2356      | 0.477928635 | 0.059872611 | 1.049769919 | 0.109236227 | 4.77928693  | 0.059872611 | 1.049769919  | 0.06329639   | 1.00623627   | -           |             |         |
| chr11      | 11933404  | 11934437  | XM 393856                         | 1034   | 1034         |            | 835       | 0.245647969 | 0.013552759 | 0.901120246 | 0.01839303  | 1.222948905 | 0.289820359 | 0.016826923  | 0.803296915  | 0.022836538  | 1.09018867  | XM 393856.3 |         |
| chrUn      | 212229354 | 212229894 | AmelGUn WGA4818 2.504814.504814.m | 541    | 541          |            | 480       | 0.256931608 | 0.005555556 | 0.341741395 | 0.031481481 | 1.936534569 | 0.283333333 | 0.006276151  | 0.317110769  | 0.035564854  | 1.796961022 | -           |         |
| chr12      | 7555057   | 7558449   | AmelG12 WGA390 2.502040.502040.m  | 3393   | 3321         |            | 2599      | 0.286058416 | 0.032539922 | 1.595040578 | 0.021693281 | 0.69360386  | 0.335894842 | 0.040540541  | 1.442176108  | 0.026254826  | 0.933980718 | -           |         |
| chr12      | 5085535   | 5086521   | NM 001011652.1                    | 987    | 987          |            | 911       | 0.381965552 | 0.048681542 | 1.343762005 | 0.02535497  | 0.069876044 | 0.406417091 | 0.025863436  | 1.292800441  | 0.027533054  | 0.673333563 | -           |         |
| chrUn      | 41008284  | 41015438  | XM 624563                         | 7175   | 7175         |            | 5053      | 0.20738676  | 0.007248397 | 0.674362973 | 0.014496794 | 1.348725945 | 0.261626756 | 0.010143198  | 0.593140996  | 0.019490851  | 1.3976113   | XM 624563.2 |         |
| chr1       | 10546880  | 1054988   | XM 624982                         | 1733   | 1733         |            | 1317      | 0.238115061 | 0.012301746 | 1.050173147 | 0.015017316 | 1.050173147 | 0.238115061 | 0.012301746  | 1.050173147  | 0.238115061  | 1.050173147 | XM 624982.2 |         |
| chrUn      | 30035757  | 30055560  | XM 396829                         | 1984   | 1984         |            | 1984      | 0.603830645 | 0.102370146 | 1.23088314  | 0.086232984 | 0.946094762 | 0.603830645 | 0.102370146  | 1.23088314   | 0.086232984  | 0.946094762 | XM 396829.2 |         |
| chrUn      | 59331418  | 59333298  | XM 393614                         | 1881   | 1881         |            | 1363      | 0.246145667 | 0.019148936 | 1.266345541 | 0.019680851 | 1.301521806 | 0.321349963 | 0.026568266  | 1.030496699  | 0.027306273  | 1.059121607 | XM 393614.3 |         |
| chrUn      | 26602823  | 26604198  | XM 624764                         | 1376   | 1376         |            | 981       | 0.251453488 | 0.014545585 | 0.923913531 | 0.026181818 | 1.663044357 | 0.321100917 | 0.020470829  | 0.798424558  | 0.035823951  | 1.397242976 | -           |         |
| chrUn      | 19082120  | 19083473  | XM 397581                         | 1354   | 1354         |            | 1138      | 0.268833087 | 0.028085735 | 1.581972105 | 0.019595564 | 1.124032812 | 0.309358752 | 0.03214596   | 1.365266275  | 0.023457863  | 0.99627539  | XM 397581.3 |         |
| chrUn      | 34094895  | 34096141  | AmelGUn WGA737 2.511850.511850.m  | 1247   | 1247         |            | 954       | 0.20529702  | 0.007223114 | 0.697856926 | 0.025479441 | 0.697856926 | 0.25479441  | 0.009646302  | 0.603215434  | 0.00750268   | 0.46916756  | -           |         |
| chrUn      | 5018517   | 5037385   | NM 001011596.1                    | 18869  | 18321        |            | 16528     | 0.299765297 | 0.032703647 | 1.457516821 | 0.024677837 | 1.099829053 | 0.325266125 | 0.036143117  | 1.368061799  | 0.027046995  | 1.023750943 | -           |         |
| chr10      | 4569420   | 4573461   | XM 397082                         | 4042   | 4042         |            | 3550      | 0.285749629 | 0.012868102 | 0.639376708 | 0.027103437 | 1.045135003 | 0.317183099 | 0.014680971  | 0.591840197  | 0.023699741  | 0.967431092 | XM 397082.3 |         |
| chrUn      | 80907034  | 8203915   | XM 624862                         | 597    | 595          |            | 502       | 0.20549394  | 0.01133605  | 1.08819587  | 0.01513726  | 1.05137095  | 0.26192709  | 0.018258497  | 0.82583829   | 0.026192709  | 0.82583829  | XM 624862.2 |         |
| chr10      | 5144782   | 5145918   | AmelG10 WGA322 2.503695.503695.m  | 1137   | 1137         |            | 1097      | 0.331574318 | 0.008802817 | 1.32169516  | 0.032570423 | 1.18869721  | 0.342752963 | 0.00913242   | 0.311827163  | 0.033789954  | 1.153760503 | -           |         |
| chrUn      | 75301135  | 75309637  | XM 395473                         | 8503   | 8503         |            | 6894      | 0.251440668 | 0.015408139 | 0.974860701 | 0.018113385 | 1.14601945  | 0.326109285 | 0.01862809   | 0.865867246  | 0.021452766  | 1.0954773   | XM 395473.3 |         |
| chr6       | 10211990  | 10312571  | XM 623264                         | 100582 | 99849        |            | 93014     | 0.348692431 | 0.04864994  | 1.647737594 | 0.027933017 | 0.945195423 | 0.359419012 | 0.051966095  | 1.609322168  | 0.029790305  | 1.025266663 | -           |         |
| chr9       | 7016366   | 7065920   | XM 392551                         | 49552  | 48821        |            | 46088     | 0.375535118 | 0.05323965  | 1.162752547 | 0.03050167  | 0.866629251 | 0.38474232  | 0.0357994    | 1.509738926  | 0.031919517  | 0.863631807 | XM 392551.3 |         |
| chr3       | 2577322   | 2649403   | XM 624259                         | 72082  | 72082        |            | 69634     | 0.432382564 | 0.073514518 | 1.573174024 | 0.042396748 | 0.907269261 | 0.344112646 | 0.057396085  | 1.600306865  | 0.043437639  | 0.920045252 | XM 624259.2 |         |
| chrUn      | 9890370   | 9891702   | XM 625030                         | 1333   | 1333         |            | 927       | 0.231057764 | 0.003003305 | 1.252303865 | 0.015765766 | 1.18142779  | 0.294498382 | 0.004338395  | 0.200220648  | 0.019522777  | 0.900929251 | XM 625030.2 |         |
| chr12      | 753510    | 753510    | AmelG12 WGA390 2.501706.501706.m  | 1444   | 1444         |            | 1444      | 0.203817734 | 0.025261242 | 1.05261242  | 0.034171287 | 1.05261242  | 0.203817734 | 0.025261242  | 1.05261242   | 0.203817734  | 1.05261242  | -           |         |
| chr14      | 1645670   | 1647113   | XM 624373                         | 1245   | 1245         |            | 1053      | 0.266620499 | 0.007623040 | 0.96540066  | 0.025641026 | 1.468577313 | 0.302811272 | 0.008807966  | 0.359394001  | 0.02983871   | 1.329961639 | XM 624373.1 |         |
| chrUn      | 4579202   | 4585320   | AmelGUn WGA468 2.508152.508152.m  | 6119   | 6119         |            | 5764      | 0.318516097 | 0.047074207 | 1.858020506 | 0.025711625 | 1.936323831 | 0.3351839   | 0.05004344   | 1.785362509  | 0.02675934   | 0.953710509 | -           |         |
| chr11      | 6428693   | 6431011   | XM 394838                         | 2319   | 2319         |            | 2046      | 0.297973264 | 0.009922347 | 1.447425876 | 0.025884383 | 1.176719736 | 0.331867058 | 0.011268986  | 0.409746384  | 0.029397354  | 1.068903611 | XM 394838.3 |         |
| chrUn      | 282043095 | 282047543 | XM 394921                         | 4449   | 4449         |            | 3157      | 0.235783322 | 0.01618705  | 1.182549702 | 0.018884892 | 1.369413319 | 0.297117517 | 0.021649156  | 1.003296461  | 0.02587966   | 1.015100933 | XM 394921.2 |         |
| chrUn      | 131180597 | 131185712 | XM 397222                         | 5116   | 5116         |            | 4599      | 0.310203284 | 0.031280547 | 1.304034861 | 0.031280547 | 1.304034861 | 0.339856491 | 0.034888792  | 1.211498068  | 0.034670737  | 1.023926205 | XM 397222.3 |         |
| chr1       | 16040330  | 16044682  | XM 623507                         | 4353   | 4303         |            | 3103      | 0.223100163 | 0.015112764 | 1.223444753 | 0.016972797 | 1.034702569 | 0.277795682 | 0.020064725  | 1.04999207   | 0.022653722  | 1.185474918 | XM 623507.2 |         |
| chr14      | 4943079   | 4945362   | XM 623246                         | 2284   | 2284         |            | 1663      | 0.27408056  | 0.019710907 | 1.065268269 | 0.020586947 | 1.112613526 | 0.351773903 | 0.02722323   | 0.894684757  | 0.02722323   | 0.894684757 | -           |         |
| chr3       |           |           |                                   |        |              |            |           |             |             |             |             |             |             |              |              |              |             |             |         |

| chromosome | start     | end       | ID                                | lenqth | valid | lenqth | without      | Ns          | non-repetitive | nr          | lenqth      | qcContent   | cpaContent  | cpqQ/E      | qpcContent  | qpcQ/E      | nrCGcontent | nrCpGContent | nrCpGQ/E | nrGpCCContent | nrGpCCQ/E | RefSeqID | version |
|------------|-----------|-----------|-----------------------------------|--------|-------|--------|--------------|-------------|----------------|-------------|-------------|-------------|-------------|-------------|-------------|-------------|-------------|--------------|----------|---------------|-----------|----------|---------|
| chr7       | 5952322   | 5957768   | XM 392465                         | 5447   | 5447  | 4371   | 0.301633927  | 0.145342206 | 0.02919574     | 1.300781505 | 0.338824068 | 0.028932262 | 1.015784128 | 0.033524684 | 1.177019704 | XM 392465.3 |             |              |          |               |           |          |         |
| chr15      | 4971165   | 4972830   | AmelG15 WGA436 2.511906.511906.m  | 1666   | 1666  | 1641   | 0.43457383   | 0.058258258 | 1.234871884    | 0.044444444 | 0.042067177 | 0.441194394 | 0.059182428 | 1.217094611 | 0.045149481 | 0.928505167 |             |              |          |               |           |          |         |
| chrUn      | 14260006  | 14302685  | XM 393365                         | 42680  | 42680 | 34141  | 0.279380718  | 0.032724991 | 1.678517623    | 0.02496012  | 1.280245699 | 0.326176738 | 1.448980484 | 1.483980861 | 1.483980861 | XM 393365.3 |             |              |          |               |           |          |         |
| chr1       | 3858089   | 5862759   | XM 624583                         | 3871   | 3871  | 2821   | 0.27131089   | 0.021220854 | 1.12380396     | 0.02462667  | 1.39413388  | 0.346311088 | 0.028846154 | 0.96466154  | 0.031338031 | 1.047146592 |             |              |          |               |           |          |         |
| chrUn      | 44065788  | 44070644  | AmelGUn WGA880 2.514026.514026.m  | 4857   | 4807  | 3336   | 0.1917953    | 0.008949011 | 0.984934679    | 0.011862643 | 1.305611086 | 0.241906475 | 0.011466506 | 0.790984626 | 0.015992758 | 1.103215    |             |              |          |               |           |          |         |
| chr11      | 2973917   | 2975120   | XM 623680                         | 1204   | 1204  | 1025   | 0.321428571  | 0.028262677 | 1.095103931    | 0.029093932 | 1.12731281  | 0.347031963 | 0.031135531 | 1.035167486 | 0.032051282 | 1.065615389 |             |              |          |               |           |          |         |
| chrUn      | 8078928   | 8081791   | XM 624340                         | 2864   | 2864  | 2054   | 0.243715084  | 0.010129235 | 0.698240303    | 0.02549773  | 1.757639383 | 0.318889971 | 0.014215686 | 0.5739214   | 0.034313725 | 1.385327517 |             |              |          |               |           |          |         |
| chrUn      | 24372432  | 24375731  | AmelGUn WGA621 2.512343.512343.m  | 3300   | 3300  | 2683   | 0.238787879  | 0.005759321 | 0.414282167    | 0.016974841 | 1.221042175 | 0.279910548 | 0.007108118 | 0.3712971   | 0.020576132 | 1.074807396 |             |              |          |               |           |          |         |
| chr11      | 275504    | 277484    | XM 624477                         | 1981   | 1981  | 1303   | 0.232205957  | 0.014646465 | 1.092509449    | 0.01969697  | 1.469236846 | 0.303914045 | 0.021621622 | 0.94177336  | 0.028571429 | 1.04486225  |             |              |          |               |           |          |         |
| chr1       | 10249318  | 10258027  | XM 397346                         | 8710   | 8709  | 6981   | 0.277873464  | 0.029053744 | 1.059407157    | 0.023771245 | 1.239584037 | 0.326171036 | 0.03580673  | 1.356017393 | 0.03291832  | 1.2555156   |             |              |          |               |           |          |         |
| chrUn      | 122621949 | 12266918  | XM 625037                         | 4970   | 4970  | 4916   | 0.427364185  | 0.068826726 | 1.509107527    | 0.038438318 | 0.842805667 | 0.430431245 | 0.069611235 | 1.504281906 | 0.03687645  | 0.840110655 |             |              |          |               |           |          |         |
| chr5       | 4125428   | 4168640   | XM 393275                         | 43213  | 43213 | 41279  | 0.350288108  | 0.049130013 | 1.602470052    | 0.028070906 | 1.915158274 | 0.350606876 | 0.050931315 | 1.580133518 | 0.02949127  | 1.907448106 |             |              |          |               |           |          |         |
| chr5       | 31166733  | 31169320  | XM 393225                         | 2588   | 2588  | 2465   | 0.4872448841 | 0.07421724  | 1.504078767    | 0.039006825 | 0.93311968  | 0.078017066 | 0.128090264 | 0.052011377 | 0.085395076 | XM 393225.3 |             |              |          |               |           |          |         |
| chr2       | 5160479   | 5163730   | XM 394346                         | 3252   | 3252  | 3140   | 0.483394834  | 0.082436173 | 1.414458106    | 0.057520763 | 0.986953977 | 0.492038217 | 0.084475614 | 1.397607427 | 0.058654766 | 0.970414213 |             |              |          |               |           |          |         |
| chrUn      | 255278071 | 255279285 | AmelGUn WGA5939 2.503323.503323.m | 1215   | 1215  | 1215   | 0.372016461  | 0.024711697 | 0.716601346    | 0.054365733 | 1.576522961 | 0.372016461 | 0.024711697 | 0.716601346 | 0.054365733 | 1.576522961 |             |              |          |               |           |          |         |
| chr11      | 6372947   | 6374048   | XM 001011587.1                    | 1102   | 1102  | 570    | 0.201451906  | 0.011807448 | 1.185434177    | 0.011807448 | 1.185434177 | 0.31754386  | 0.021238938 | 0.867991317 | 0.021238938 | 0.867991317 |             |              |          |               |           |          |         |
| chrUn      | 62080377  | 62088641  | XM 393200                         | 8265   | 8265  | 7137   | 0.281185723  | 0.025290416 | 1.28056437     | 0.020329138 | 1.029353178 | 0.316799776 | 0.029353933 | 1.170888744 | 0.023314607 | 0.929988189 |             |              |          |               |           |          |         |
| chrUn      | 246400011 | 246402633 | AmelGUn WGA5710 2.506828.506828.m | 2623   | 2623  | 1684   | 0.228364468  | 0.012585812 | 0.965372835    | 0.012585812 | 0.965372835 | 0.293942993 | 0.017313433 | 0.801685102 | 0.017910448 | 0.829329416 |             |              |          |               |           |          |         |
| chr3       | 3341332   | 3344443   | XM 392921                         | 3112   | 2991  | 1787   | 0.214978268  | 0.008029447 | 0.698076114    | 0.022080964 | 1.919709313 | 0.317851147 | 0.011356379 | 0.536897023 | 0.035323995 | 1.409354686 |             |              |          |               |           |          |         |
| chr15      | 5136983   | 5146868   | AmelG15 WGA436 2.514077.514077.m  | 9886   | 9836  | 7924   | 0.261691745  | 0.014338011 | 0.845618955    | 0.022574741 | 1.29746865  | 0.30338213  | 0.015957447 | 0.700014609 | 0.026089159 | 1.244486329 |             |              |          |               |           |          |         |
| chrUn      | 1494704   | 1499867   | XM 394448                         | 4264   | 4264  | 3723   | 0.289634146  | 0.015247478 | 0.727097995    | 0.029087497 | 1.387079253 | 0.319903304 | 0.017232095 | 0.673356168 | 0.033117932 | 1.294452322 |             |              |          |               |           |          |         |
| chrUn      | 99644665  | 99647842  | XM 624141                         | 2878   | 2878  | 2478   | 0.30333565   | 0.011817866 | 0.513864307    | 0.042259297 | 0.982387646 | 0.344222131 | 0.013917315 | 0.46985928  | 0.026066631 | 0.898260387 |             |              |          |               |           |          |         |
| chr11      | 3602978   | 3613699   | XM 393818                         | 10722  | 9940  | 9705   | 0.419315895  | 0.069329845 | 1.577384503    | 0.034010867 | 0.773811266 | 0.422771767 | 0.070515464 | 1.57837593  | 0.034123711 | 0.763804726 |             |              |          |               |           |          |         |
| chr6       | 10575992  | 10578989  | AmelG6 WGA202 2.501928.501928.m   | 2998   | 2998  | 2417   | 0.274516344  | 0.025025025 | 1.537654341    | 0.022689356 | 1.020983377 | 0.324369053 | 0.030769231 | 1.17811195  | 0.027858628 | 1.066668928 |             |              |          |               |           |          |         |
| chrUn      | 80995873  | 80996618  | XM 395877                         | 746    | 746   | 552    | 0.242627346  | 0.017449664 | 1.187456279    | 0.012080537 | 0.82205116  | 0.300724638 | 0.023679417 | 1.051167412 | 0.016393443 | 0.727731285 |             |              |          |               |           |          |         |
| chrUn      | 4862010   | 4862710   | XM 395967                         | 7031   | 7031  | 6400   | 0.207916667  | 0.009132669 | 1.757222643    | 0.01722643  | 1.757222643 | 0.027086802 | 0.276467846 | 1.01678802  | 0.026667846 | 1.48458621  |             |              |          |               |           |          |         |
| chrUn      | 24550953  | 24554814  | XM 397254                         | 3862   | 3862  | 2529   | 0.196530205  | 0.006475000 | 0.68369491     | 0.012173012 | 0.825065306 | 0.377819766 | 0.00876145  | 0.017921414 | 0.022088659 | 1.19168188  |             |              |          |               |           |          |         |
| chr1       | 11253851  | 11258938  | AmelG1 WGA31 2.506687.506687.m    | 5088   | 5088  | 4745   | 0.388561321  | 0.050127777 | 1.328277307    | 0.035187733 | 0.93239858  | 0.406322445 | 0.053420608 | 1.29432702  | 0.03733311  | 0.905517323 |             |              |          |               |           |          |         |
| chrUn      | 4103311   | 4109674   | XM 392544                         | 6364   | 6364  | 4896   | 0.2401005674 | 0.007700777 | 0.537643783    | 0.019016187 | 1.327650973 | 0.287377451 | 0.009641026 | 0.468750257 | 0.024       | 1.16688938  |             |              |          |               |           |          |         |
| chr13      | 1008623   | 1010553   | AmelG13 WGA392 2.508721.508721.m  | 1931   | 1931  | 1910   | 0.447436561  | 0.077720207 | 1.553063402    | 0.04611399  | 0.921484285 | 0.447120419 | 0.078616352 | 1.572982435 | 0.046645702 | 0.933302912 |             |              |          |               |           |          |         |
| chrUn      | 18502417  | 18514244  | XM 623745                         | 11828  | 11828 | 8624   | 0.240252756  | 0.025196584 | 1.575219419    | 0.017840534 | 1.21822745  | 0.297077922 | 0.033628113 | 1.5246227   | 0.032388411 | 1.060127394 |             |              |          |               |           |          |         |
| chr7       | 9342813   | 9349928   | XM 394660                         | 7116   | 7116  | 6407   | 0.298201237  | 0.034293744 | 1.546261944    | 0.023049895 | 1.036844258 | 0.323708444 | 0.037889463 | 1.44638838  | 0.025671757 | 0.980197084 |             |              |          |               |           |          |         |
| chrUn      | 19008493  | 19011569  | XM 625238                         | 3077   | 3077  | 2745   | 0.315567111  | 0.015604681 | 0.64109981     | 0.023081925 | 0.948293469 | 0.348997816 | 0.01754386  | 0.588363099 | 0.025950292 | 0.870287084 |             |              |          |               |           |          |         |
| chrUn      | 24567205  | 24567578  | XM 392756                         | 4996   | 4996  | 3498   | 0.264944276  | 0.000292499 | 1.154716596    | 0.017739683 | 1.010901562 | 0.33221777  | 0.03825861  | 1.33848761  | 0.026337621 | 0.936879784 |             |              |          |               |           |          |         |
| chrUn      | 14021655  | 14022599  | XM 624961                         | 945    | 945   | 799    | 0.266666667  | 0.00529661  | 0.317130761    | 0.029661017 | 1.77593226  | 0.301627034 | 0.006281407 | 0.295074064 | 0.035175879 | 1.65241476  |             |              |          |               |           |          |         |
| chr9       | 6036732   | 6051574   | XM 623530                         | 14843  | 14843 | 10623  | 0.231759078  | 0.018393747 | 1.373073426    | 0.017180973 | 1.282541113 | 0.288619034 | 0.024385874 | 1.199388895 | 0.023482338 | 1.13082684  |             |              |          |               |           |          |         |
| chr10      | 1136721   | 1139358   | XM 396885                         | 2638   | 2638  | 2072   | 0.265731615  | 0.008342814 | 0.478064032    | 0.028062192 | 0.628033563 | 0.319015444 | 0.010658915 | 0.424110569 | 0.035852713 | 1.426553732 |             |              |          |               |           |          |         |
| chr13      | 4229394   | 4254567   | XM 393936                         | 25174  | 25174 | 24794  | 0.420036546  | 0.069479204 | 1.575219419    | 0.040916855 | 0.927659235 | 0.422682907 | 0.070295791 | 1.573839758 | 0.041523748 | 0.926676687 |             |              |          |               |           |          |         |
| chrUn      | 3783152   | 3804788   | XM 623626                         | 24327  | 24327 | 20135  | 0.259257734  | 0.029701339 | 1.771471534    | 0.017054853 | 1.017183378 | 0.297640928 | 0.03559322  | 1.611160895 | 0.020438684 | 0.925176424 |             |              |          |               |           |          |         |
| chrUn      | 155802770 | 155805822 | AmelGUn WGA3361 2.504137.504137.m | 3053   | 3053  | 3053   | 0.315099902  | 0.021952818 | 0.884413995    | 0.030144168 | 1.214419217 | 0.315099902 | 0.021952818 | 0.884413995 | 0.030144168 | 1.214419217 |             |              |          |               |           |          |         |
| chr1       | 5122212   | 5122212   | XM 394781                         | 5577   | 5577  | 4981   | 0.472212222  | 0.000000000 | 1.572212222    | 0.000000000 | 1.572212222 | 0.380463558 | 0.030436755 | 1.390218815 | 0.021449355 | 1.291449355 |             |              |          |               |           |          |         |
| chrUn      | 72558325  | 72562403  | AmelGUn WGA1369 2.508467.508467.m | 4079   | 4029  | 3174   | 0.247455944  | 0.007698038 | 0.51531172     | 0.017630991 | 1.180230068 | 0.299621928 | 0.009803922 | 0.44843727  | 0.022137887 | 0.91260286  |             |              |          |               |           |          |         |
| chrUn      | 57223759  | 57226286  | AmelGUn WGA1096 2.512971.512971.m | 2528   | 2528  | 2141   | 0.227848011  | 0.007518797 | 0.594486109    | 0.01524669  | 1.311315336 | 0.010982659 | 0.044986715 | 0.025543533 | 0.054446415 | 1.05446415  |             |              |          |               |           |          |         |
| chrUn      | 14374914  | 14380669  | AmelGUn WGA527 2.505989.505989.m  | 5756   | 5756  | 3570   | 0.220291869  | 0.009094431 | 0.81651043     | 0.021189957 | 1.747618816 | 0.306883473 | 0.015779093 | 0.662499205 | 0.032967033 | 1.384150124 |             |              |          |               |           |          |         |
| chrUn      | 257024723 | 257026049 | AmelGUn WGA5985 2.509168.509168.m | 1327   | 1327  | 1293   | 0.412961567  | 0.009049774 | 0.818149088    | 0.00947999  | 0.79987999  | 0.423820524 | 0.00929512  | 0.212728603 | 0.034082107 | 0.80040878  |             |              |          |               |           |          |         |
| chr16      | 2015770   | 2018298   | XM 623478                         | 2529   | 2529  | 2529   | 0.255045418  | 0.021360759 | 1.374115937    | 0.022547468 | 1.087755712 | 0.325620767 | 0.030079455 | 1.135340882 | 0.031782066 | 1.19960546  |             |              |          |               |           |          |         |
| chrUn      | 466615    | 473739    | XM 392051                         | 7125   | 7125  | 6772   | 0.449684511  | 0.081976418 | 1.623019415    | 0.050814149 | 1.006049706 | 0.458719647 | 0.084303611 | 1.603579701 | 0.052468681 | 0.998032122 |             |              |          |               |           |          |         |
| chrUn      | 38447161  | 38448332  | XM 395340                         | 1172   | 1172  | 674    | 0.230375427  | 0.007685739 | 0.601571377    | 0.025619129 | 0.905243924 | 0.353115727 | 0.011976048 | 0.404192314 | 0.041916168 | 0.406730865 |             |              |          |               |           |          |         |
| chr4       | 7490961   | 7518572   | AmelG15 WGA140 2.503248.503248.m  | 27612  | 27501 | 25933  | 0.36140504   | 0.054585788 | 1.674370052    | 0.030329479 | 0.303229953 | 0.377819766 | 0.05769008  | 1.619139205 | 0.022088659 | 1.900702158 |             |              |          |               |           |          |         |
| chrUn      | 23594533  | 23597556  | XM 394948                         | 3024   | 3024  | 2317   | 0.219907407  | 0.004300364 | 0.538928278    | 0.016539861 | 1.380471839 | 0.264566249 | 0.005630143 | 0.325402755 | 0.021221308 | 1.226518078 |             |              |          |               |           |          |         |
| chrUn      | 25351689  | 25358050  | AmelGUn WGA631 2.506165.506165.m  | 6362   | 6362  |        |              |             |                |             |             |             |             |             |             |             |             |              |          |               |           |          |         |

| chromosome | start     | end       | ID                                | lenqth | valid lenqth | without Ns | non-repetitive | nr lenqth | qcContent   | cpaContent  | cpaQ/E      | qpcContent  | apqc/E      | nrGCcontent | nrCpGContent | nrCpGGO/E    | nrGpCContent | nrGpCCO/E    | RefSeqID    | version |
|------------|-----------|-----------|-----------------------------------|--------|--------------|------------|----------------|-----------|-------------|-------------|-------------|-------------|-------------|-------------|--------------|--------------|--------------|--------------|-------------|---------|
| chr11      | 9737379   | 8177891   | AmelG11 WGA366 2.503871.503871.m  | 44113  | 44013        |            | 37386          |           | 0.307704542 | 0.04310384  | 1.82099244  | 0.025994092 | 1.098163074 | 0.346145616 | 0.050056333  | 1.671171361  | 0.030098181  | 1.004852233  | -           |         |
| chr11      | 534998    | 555092    | XM 392513                         | 20095  | 20095        |            | 19234          |           | 0.355013685 | 0.053249726 | 1.690012617 | 0.032198666 | 1.021904826 | 0.365965618 | 0.055642307  | 1.661870375  | 0.035572767  | 1.002718795  | XM 392513.3 |         |
| chr7       | 2146505   | 2218313   | XM 394675                         | 71809  | 71809        |            | 69305          |           | 0.432272835 | 0.160868855 | 1.608688555 | 0.042357737 | 0.436577448 | 0.436577448 | 0.077375278  | 0.1624524085 | 0.035620187  | 0.915822799  | XM 394675.3 |         |
| chr13      | 2206060   | 2211813   | XM 391961                         | 5154   | 5154         |            | 5647           |           | 0.403892844 | 0.06250458  | 1.521155007 | 0.045011999 | 1.103889682 | 0.406505313 | 0.062530312  | 1.520988844  | 0.045888844  | 1.13625297   | XM 391961.3 |         |
| chrUn      | 137847110 | 137848178 | AmelGUn WGA2888 2.503301.503301.m | 1069   | 1069         |            | 1069           |           | 0.319925164 | 0.016853933 | 0.6624937   | 0.022471191 | 0.883324934 | 0.319925164 | 0.016853933  | 0.6624937    | 0.02247191   | 1.883324934  | XM 623432.2 |         |
| chr15      | 234643    | 240028    | XM 623432                         | 5386   | 5386         |            | 3238           |           | 0.191607872 | 0.00538533  | 0.602712212 | 0.013370474 | 1.49638894  | 0.262507721 | 0.008701057  | 0.517626587  | 0.021131137  | 1.255966284  | XM 623432.2 |         |
| chr7       | 8427143   | 8429058   | XM 394704                         | 1916   | 1916         |            | 1807           |           | 0.259916493 | 0.009921671 | 0.604661751 | 0.01462141  | 0.891080476 | 0.270614278 | 0.010526316  | 0.597550727  | 0.015512465  | 0.875001072  | XM 394704.3 |         |
| chr12      | 1948158   | 2110545   | XM 396330                         | 162388 | 160156       |            | 141497         |           | 0.329222758 | 0.045276586 | 1.670932758 | 0.028629589 | 0.352162943 | 0.05025293  | 1.620918647  | 0.031343432  | 0.010988876  | XM 396330.3  |             |         |
| chr4       | 1351070   | 1369497   | XM 394473                         | 18428  | 18427        |            | 17366          |           | 0.37548163  | 0.066811398 | 1.896645818 | 0.0348711   | 0.950634013 | 0.387538869 | 0.069834496  | 1.862896376  | 0.035003748  | 0.93755657   | XM 394473.1 |         |
| chrUn      | 15037247  | 15038352  | XM 625088                         | 1106   | 1106         |            | 513            |           | 0.184448463 | 0.004524887 | 0.586258495 | 0.014479638 | 1.702587184 | 0.288499025 | 0.007889546  | 0.383644498  | 0.025641026  | 1.428484619  | -           |         |
| chrUn      | 279325962 | 279334609 | XM 623948                         | 1648   | 1648         |            | 1348           |           | 0.269417476 | 0.016393443 | 0.909375335 | 0.020306343 | 1.111458743 | 0.315281868 | 0.020104244  | 0.814526257  | 0.024571854  | 0.995532091  | XM 623948.2 |         |
| chr4       | 9782726   | 9785995   | XM 623313                         | 3270   | 3270         |            | 2620           |           | 0.257492355 | 0.007747991 | 0.42873429  | 0.026613643 | 1.621734054 | 0.309160305 | 0.008815638  | 0.373968376  | 0.03334611   | 1.41457603   | XM 623313.1 |         |
| chr4       | 6307386   | 6310878   | AmelG4 WGA139 2.503080.503080.m   | 3493   | 3493         |            | 3393           |           | 0.529051871 | 0.077033219 | 1.101188112 | 0.06672394  | 0.95817212  | 0.529051871 | 0.079056047  | 1.127471367  | 0.026431829  | 0.904501283  | -           |         |
| chrUn      | 30404741  | 30406067  | AmelGUn WGA690 2.507672.507672.m  | 1327   | 1327         |            | 973            |           | 0.222305953 | 0.005279035 | 0.443850519 | 0.013574661 | 1.141329907 | 0.274409044 | 0.007231405  | 0.397525304  | 0.015495868  | 0.851839937  | -           |         |
| chr11      | 5986746   | 5988522   | XM 623721                         | 1777   | 1777         |            | 1341           |           | 0.242543613 | 0.002815315 | 0.198083842 | 0.017454955 | 1.228119819 | 0.302013423 | 0.003745318  | 0.17109015   | 1.026540898  | XM 623721.2  |             |         |
| chrUn      | 22325177  | 22328383  | XM 392607                         | 3207   | 3207         |            | 2868           |           | 0.287496102 | 0.021210231 | 1.030536759 | 0.021834061 | 1.060846664 | 0.313110181 | 0.023743017  | 0.97224292   | 0.024092179  | 0.98654061   | XM 392607.3 |         |
| chr2       | 7055693   | 7060617   | XM 395792                         | 4925   | 4925         |            | 4065           |           | 0.24893401  | 0.012185215 | 0.79549128  | 0.018074736 | 1.179978732 | 0.289052891 | 0.014818474  | 0.717814617  | 0.015974772  | XM 395792.3  |             |         |
| chr4       | 1793047   | 1797149   | AmelG4 WGA130 2.506212.506212.m   | 4103   | 4103         |            | 3258           |           | 0.245673897 | 0.019258898 | 1.27686329  | 0.019990429 | 1.32535177  | 0.251589932 | 0.02404439   | 1.131297485  | 0.024660912  | 1.160305113  | -           |         |
| chr10      | 1142085   | 1146745   | XM 393672                         | 4661   | 4661         |            | 4409           |           | 0.295430165 | 0.030472103 | 1.398769493 | 0.027467811 | 1.260862641 | 0.309140395 | 0.032258065  | 1.351638115  | 0.029077692  | 1.218378019  | XM 393672.3 |         |
| chrUn      | 17974103  | 17976739  | XM 392774                         | 2637   | 2637         |            | 2231           |           | 0.276829731 | 0.011001517 | 0.570650689 | 0.024279211 | 1.279030487 | 0.314208875 | 0.013022003  | 0.533063643  | 0.028891878  | 1.158034811  | XM 392774.3 |         |
| chrUn      | 63579132  | 63585820  | XM 395294                         | 6689   | 6639         |            | 6267           |           | 0.312697695 | 0.03751695  | 1.536811478 | 0.025312641 | 1.036884852 | 0.326950694 | 0.03980179   | 1.495050716  | 0.02684522   | 1.005643895  | XM 395294.3 |         |
| chr13      | 2014300   | 2027252   | XM 396935                         | 38059  | 38059        |            | 3630           |           | 0.214380384 | 0.017069937 | 0.49198094  | 0.014749571 | 1.286728219 | 0.283409852 | 0.024834644  | 1.23974853   | 0.021215525  | 1.0590881659 | XM 396935.3 |         |
| chrUn      | 57444151  | 57446630  | XM 395972                         | 2780   | 2780         |            | 2372           |           | 0.241366906 | 0.005756675 | 1.018935557 | 0.017992083 | 1.352560849 | 0.274030354 | 0.00887574   | 0.472860452  | 0.021132713  | 1.12588582   | XM 395972.3 |         |
| chr7       | 3693647   | 3732426   | XM 395180                         | 39600  | 39600        |            | 32786          |           | 0.244217172 | 0.023914745 | 1.603942927 | 0.016389103 | 1.099221852 | 0.281156591 | 0.028528574  | 1.443606265  | 0.019284337  | 0.975828269  | XM 395180.3 |         |
| chrUn      | 150860498 | 150861134 | AmelGUn WGA3232 2.500797.500797.m | 637    | 637          |            | 537            |           | 0.285714286 | 0.004716981 | 0.238050261 | 0.026272956 | 1.351529811 | 0.327746471 | 0.005607477  | 0.216904417  | 0.031775701  | 1.229125031  | -           |         |
| chr5       | 13254363  | 132547175 | 2.525635.252635.m                 | 1578   | 1577         |            | 1528           |           | 0.26379201  | 0.013554127 | 0.635554127 | 0.027355121 | 1.439278755 | 0.26379201  | 0.013554127  | 1.439278755  | 0.013554127  | 1.439278755  | XM 624045.2 |         |
| chrUn      | 35098155  | 35099500  | AmelGUn WGA748 2.506340.506340.m  | 985    | 985          |            | 637            |           | 0.239593909 | 0.016260163 | 0.17775077  | 0.029471545 | 1.346793919 | 0.340222576 | 0.024038462  | 0.930434154  | 0.046474359  | 0.68306031   | -           |         |
| chr1       | 5279332   | 5297505   | XM 623388                         | 18174  | 16849        |            | 12712          |           | 0.250756271 | 0.022735367 | 1.447907203 | 0.021458142 | 1.372298586 | 0.304043424 | 0.029688117  | 1.287821571  | 0.028266877  | 1.226170539  | -           |         |
| chr2       | 6101629   | 6145363   | AmelG2 WGA75 2.506237.506237.m    | 43735  | 40443        |            | 38208          |           | 0.371955592 | 0.059399575 | 1.717422053 | 0.033334982 | 0.96381554  | 0.381752513 | 0.062378781  | 1.712164485  | 0.03491115   | 1.026526594  | -           |         |
| chr9       | 6839002   | 6840305   | XM 623078                         | 1304   | 1304         |            | 930            |           | 0.204754601 | 0.003837299 | 0.368394526 | 0.012279355 | 1.178862482 | 0.266666667 | 0.005411255  | 0.307260688  | 0.016233766  | 0.927182065  | XM 623078.2 |         |
| chrUn      | 28628799  | 28633753  | AmelGUn WGA670 2.506001.506001.m  | 4955   | 4955         |            | 3632           |           | 0.242381433 | 0.010294713 | 0.7168853   | 0.017157852 | 1.194758834 | 0.297924631 | 0.013424528  | 0.013657553  | 1.036728522  | -            |             |         |
| chrUn      | 15041455  | 15043670  | XM 393015                         | 2053   | 2053         |            | 1317           |           | 0.213346232 | 0.018031189 | 1.591081713 | 0.021929825 | 1.935099381 | 0.304479879 | 0.027565084  | 1.19558228   | 0.034456355  | 1.49447785   | XM 393015.3 |         |
| chr9       | 3815349   | 3821570   | AmelG9 WGA287 2.501610.501610.m   | 6322   | 6322         |            | 5393           |           | 0.247390066 | 0.009333966 | 0.618419127 | 0.018984338 | 1.527801614 | 0.300734285 | 0.010972661  | 0.565070629  | 0.0221313    | 1.39718726   | -           |         |
| chr1       | 3406423   | 34064563  | AmelG1 WGA6 2.500351.500351.m     | 5159   | 5159         |            | 5012           |           | 0.238454507 | 0.010651928 | 0.765784034 | 0.024877832 | 0.866839417 | 0.378178835 | 0.057053176  | 1.596828435  | 0.031308307  | 1.596828435  | XM 623078.2 |         |
| chr7       | 1332715   | 1333854   | XM 394669                         | 1140   | 1140         |            | 920            |           | 0.275438596 | 0.014925373 | 0.794178469 | 0.048252968 | 1.308058655 | 0.371391304 | 0.016339869  | 0.655733031  | 0.029411765  | 1.180319456  | XM 394669.2 |         |
| chr10      | 6832586   | 6847279   | XM 393394                         | 14694  | 14694        |            | 12872          |           | 0.270314414 | 0.027496087 | 0.52548924  | 0.019805349 | 1.297622747 | 0.031159928 | 1.407189667  | 0.022590948  | 1.020212509  | XM 393394.2  |             |         |
| chrUn      | 71782640  | 71785259  | AmelGUn WGA1466 2.508969.508969.m | 2620   | 2620         |            | 2327           |           | 0.301145038 | 0.013363879 | 0.590133121 | 0.028636884 | 1.264570973 | 0.331757628 | 0.01464255   | 0.532665776  | 0.032299742  | 1.174998035  | -           |         |
| chr14      | 1950667   | 1957686   | AmelG14 WGA410 2.509395.509395.m  | 7020   | 7020         |            | 6767           |           | 0.378347578 | 0.049864653 | 1.393878162 | 0.035047728 | 0.97967222  | 0.391458459 | 0.051790471  | 1.352381715  | 0.036401302  | 0.950531148  | -           |         |
| chr4       | 6041030   | 6144275   | XM 393717                         | 3946   | 3946         |            | 3895           |           | 0.118884662 | 0.01895605  | 1.00633714  | 0.006948641 | 1.630034851 | 0.363003811 | 0.118705306  | 1.196379041  | 0.098920863  | 0.996982534  | XM 393717.2 |         |
| chr9       | 302489    | 303831    | XM 001011589.1                    | 1343   | 1343         |            | 1318           |           | 0.632247271 | 0.044709389 | 1.666151051 | 0.033532042 | 1.049613288 | 0.330804249 | 0.044072948  | 1.611013316  | 0.024992459  | 1.249923969  | -           |         |
| chr1       | 4454126   | 4454126   | XM 391283                         | 17176  | 21022        |            | 10665          |           | 0.292678167 | 0.015684548 | 1.329615647 | 0.017362615 | 1.573246215 | 0.453548376 | 0.038490716  | 1.720255523  | 0.048048048  | 0.935008106  | XM 397453.3 |         |
| chrUn      | 9471498   | 9480970   | AmelGUn WGA494 2.511162.511162.m  | 9473   | 9423         |            | 5580           |           | 0.208213945 | 0.014860418 | 0.716965871 | 0.01634646  | 1.51466592  | 0.295275557 | 0.073997227  | 0.026325279  | 0.215351745  | -            |             |         |
| chr11      | 3228148   | 3229250   | XM 624609                         | 1103   | 1103         |            | 740            |           | 0.197642792 | 0.007259528 | 0.761905388 | 0.005446446 | 0.571429041 | 0.216494845 | 0.008273009  | 0.729939465  | 0.02604757   | 0.544554599  | XM 624609.2 |         |
| chr8       | 4324646   | 4346643   | XM 623652                         | 39998  | 39948        |            | 33697          |           | 0.275833584 | 0.022280078 | 1.171564369 | 0.02432985  | 1.284771713 | 0.307831558 | 0.026043217  | 1.099339248  | 0.028632657  | 1.208644979  | -           |         |
| chr2       | 67471     | 70143     | XM 394277                         | 2673   | 2673         |            | 2830           |           | 0.368125701 | 0.056137725 | 1.664039397 | 0.034056886 | 1.09517234  | 0.387982491 | 0.059409888  | 1.586171482  | 0.035885167  | 0.958090157  | XM 394277.2 |         |
| chrUn      | 65734901  | 65736321  | XM 001011604.1                    | 1421   | 1421         |            | 880            |           | 0.237860662 | 0.018309859 | 1.312880164 | 0.019014085 | 1.363375555 | 0.336363636 | 0.028571429  | 1.037402208  | 0.029714286  | 1.078898296  | -           |         |
| chr10      | 8491994   | 8495796   | XM 392596                         | 3403   | 3403         | </         |                |           |             |             |             |             |             |             |              |              |              |              |             |         |

| chromosome | start     | end       | ID              | lenqth            | valid  | lenqth | without | Ns | non-repetitive | nr | lenqth | qcContent     | cpqContent  | cpqQ/E       | qcContent   | npCpG/E      | nrGContent  | nrCpGContent | nrCpGContent | nrCpGContent | nrCpGContent | nrCpGContent | RefSeqID    | version |
|------------|-----------|-----------|-----------------|-------------------|--------|--------|---------|----|----------------|----|--------|---------------|-------------|--------------|-------------|--------------|-------------|--------------|--------------|--------------|--------------|--------------|-------------|---------|
| chr9       | 1695400   | 1699004   | AmelG9 WGA285   | 2.519978.519978.m | 3605   | 3605   |         |    | 3208           |    |        | 0.373925104   | 0.055216426 | 0.580534019  | 0.039121396 | 0.119875863  | 0.04180798  | 0.060681889  | 0.150494829  | 0.043478261  | 0.1078287692 | -            |             |         |
| chr7       | 3436767   | 3438877   | XM 396257       |                   | 1653   |        |         |    | 1653           |    |        | 0.25438181    | 0.009952607 | 0.649275508  | 0.023222749 | 0.514976185  | 0.307320024 | 0.012750455  | 0.575411813  | 0.028536733  | 0.1287826438 | XM 396257.2  |             |         |
| chr16      | 2033508   | 2141425   | XM 393153       |                   | 107918 |        |         |    | 97738          |    |        | 0.346878873   | 0.052771358 | 0.179582072  | 0.028775906 | 0.959619678  | 0.366909493 | 0.057526887  | 0.713795759  | 0.031324447  | 0.933103911  | XM 393153.3  |             |         |
| chr1       | 6020665   | 6020843   | XM 394220       |                   | 1879   |        |         |    | 1879           |    |        | 0.471527408   | 0.060702875 | 0.103981725  | 0.055910543 | 0.103274208  | 0.060702875 | 0.055910543  | 0.103274208  | 0.055910543  | 0.103274208  | XM 394220.2  |             |         |
| chr4       | 1111648   | 1144626   | XM 392311       |                   | 32979  |        |         |    | 29647          |    |        | 0.444539391   | 0.07078628  | 0.406706816  | 0.047586967 | 0.948511416  | 0.480014841 | 0.077315581  | 0.348505271  | 0.052343494  | 0.912952124  | XM 392311.3  |             |         |
| chr2       | 4485770   | 4487962   | XM 394331       |                   | 2193   |        |         |    | 2193           |    |        | 0.264477884   | 0.006843066 | 0.418574568  | 0.019160584 | 0.172008791  | 0.3033954   | 0.007692308  | 0.357776433  | 0.025227473  | 0.041773839  | XM 394331.3  |             |         |
| chrUn      | 61369926  | 61371469  | XM 623698       |                   | 1544   |        |         |    | 1544           |    |        | 0.31865285    | 0.024627349 | 0.97041363   | 0.031756319 | 0.251322839  | 0.331972789 | 0.025885559  | 0.939982812  | 0.033378747  | 0.1212013468 | XM 623698.2  |             |         |
| chrUn      | 30982089  | 30983749  | XM 392671       |                   | 1661   |        |         |    | 1661           |    |        | 0.24563516    | 0.001807229 | 0.122280854  | 0.019277108 | 0.130432916  | 0.312706271 | 0.002483444  | 0.103461138  | 0.026490066  | 0.103585475  | XM 392671.3  |             |         |
| chr3       | 6901556   | 6912864   | XM 624654       |                   | 11309  |        |         |    | 11309          |    |        | 0.357591299   | 0.055624337 | 0.743695531  | 0.032720198 | 0.102530253  | 0.365725844 | 0.057426836  | 0.1722168218 | 0.034051169  | 0.1261157437 | XM 624654.1  |             |         |
| chr2       | 11862321  | 11868118  | AmelG2 WGA87    | 2.501732.501732.m | 5798   |        |         |    | 5798           |    |        | 0.191790273   | 0.008970157 | 0.980393672  | 0.016215284 | 0.180746253  | 0.267312207 | 0.012990847  | 0.734868492  | 0.024505462  | 0.10822292   | -            |             |         |
| chr10      | 5588900   | 5593572   | XM 624150       |                   | 4673   |        |         |    | 4673           |    |        | 0.239888722   | 0.006653274 | 0.474704343  | 0.022902397 | 0.1638495636 | 0.29006772  | 0.008774413  | 0.428031249  | 0.029153694  | 0.1422168343 | XM 624150.2  |             |         |
| chrUn      | 16348612  | 16353282  | XM 625022       |                   | 4671   |        |         |    | 4671           |    |        | 0.244983087   | 0.012633833 | 0.836346242  | 0.023126338 | 0.153093884  | 0.305840022 | 0.016120067  | 0.70967181   | 0.030016676  | 0.132145783  | XM 625022.2  |             |         |
| chrUn      | 21603481  | 21606986  | XM 395200       |                   | 3506   |        |         |    | 3506           |    |        | 0.216771249   | 0.013694722 | 0.116641619  | 0.020256776 | 0.127532392  | 0.320450098 | 0.02364532   | 0.921157682  | 0.03497373   | 0.104973383  | XM 395200.3  |             |         |
| chr10      | 8466194   | 8469033   | XM 397047       |                   | 2840   |        |         |    | 2840           |    |        | 0.239788732   | 0.006340261 | 0.44740163   | 0.020781965 | 0.1466483121 | 0.298550725 | 0.008733624  | 0.396460584  | 0.02862688   | 0.129509691  | XM 397047.3  |             |         |
| chr2       | 10240442  | 10248995  | AmelG2 WGA83    | 2.503902.503902.m | 8554   |        |         |    | 8554           |    |        | 0.324526537   | 0.043025839 | 0.136708576  | 0.027008067 | 0.1027390438 | 0.348984607 | 0.047415468  | 0.15603696   | 0.029148853  | 0.959243607  | -            |             |         |
| chr14      | 7117216   | 7121613   | AmelG14 WGA420  | 2.504388.504388.m | 4398   |        |         |    | 4398           |    |        | 0.359015639   | 0.058444557 | 0.1841316258 | 0.029222273 | 0.020658129  | 0.371163455 | 0.060548272  | 0.1785090849 | 0.030274136  | 0.942545424  | -            |             |         |
| chr13      | 5316127   | 5324441   | XM 393945       |                   | 83145  |        |         |    | 8315           |    |        | 0.327119663   | 0.043901852 | 0.1646220053 | 0.026341111 | 0.987732032  | 0.346010055 | 0.046991996  | 0.1574307868 | 0.028272657  | 0.947179734  | XM 393945.3  |             |         |
| chr10      | 2396668   | 2397781   | XM 393679       |                   | 1114   |        |         |    | 1114           |    |        | 0.287253142   | 0.005390836 | 0.261983294  | 0.022461815 | 0.1091597058 | 0.287253142 | 0.005390836  | 0.261983294  | 0.022461815  | 0.1091597058 | XM 393679.3  |             |         |
| chrUn      | 308230725 | 308232652 | AmelGUn WGA7321 | 2.508844.508844.m | 2378   |        |         |    | 2378           |    |        | 0.24432296    | 0.013041649 | 0.894039689  | 0.01769331  | 0.1245016    | 0.283536585 | 0.01582844   | 0.801043855  | 0.020929045  | 0.107151312  | -            |             |         |
| chr6       | 3071563   | 3156577   | AmelG6 WGA189   | 2.507100.507100.m | 85015  |        |         |    | 84965          |    |        | 0.346613311   | 0.048409308 | 0.1761788021 | 0.029718819 | 0.989488148  | 0.362967435 | 0.051440018  | 0.156182277  | 0.031773629  | 0.964711493  | -            |             |         |
| chrUn      | 202168610 | 202169552 | AmelGUn WGA4557 | 2.505310.505310.m | 943    |        |         |    | 943            |    |        | 0.325556734   | 0.020169851 | 0.761873255  | 0.03970276  | 0.1283154956 | 0.325556734 | 0.020169851  | 0.761873255  | 0.03970276   | 0.1283154956 | -            |             |         |
| chr14      | 1391132   | 1392502   | AmelG14 WGA409  | 2.519915.519915.m | 1371   |        |         |    | 1371           |    |        | 0.210065646   | 0.008759124 | 0.1797095558 | 0.023357664 | 0.125588156  | 0.278586279 | 0.011542497  | 0.59609012   | 0.033578174  | 0.1734080348 | -            |             |         |
| chr14      | 7299136   | 7301438   | XM 393957       |                   | 2303   |        |         |    | 2303           |    |        | 0.444203213   | 0.053866203 | 0.1092026809 | 0.030996438 | 0.792600104  | 0.444203213 | 0.053866203  | 0.1092026809 | 0.030996438  | 0.792600104  | -            |             |         |
| chrUn      | 76478864  | 76481265  | XM 395287       |                   | 2402   |        |         |    | 2402           |    |        | 0.288093256   | 0.014577259 | 0.719418412  | 0.027488546 | 0.1356617033 | 0.365579303 | 0.0191774011 | 0.606169848  | 0.036158192  | 0.108424864  | -            |             |         |
| chr8       | 6310775   | 6310775   | XM 392958       |                   | 19454  |        |         |    | 19454          |    |        | 0.298520453   | 0.051591752 | 0.22968152   | 0.028582873 | 0.133214647  | 0.302548382 | 0.058800203  | 0.133214647  | 0.302548382  | 0.058800203  | 0.133214647  | XM 394752.3 |         |
| chr5       | 9136370   | 9142823   | XM 395223       |                   | 6454   |        |         |    | 5104           |    |        | 0.260923458   | 0.010847668 | 0.661214244  | 0.018596002 | 0.133510133  | 0.303487461 | 0.017356904  | 0.606160003  | 0.025888802  | 0.017418781  | XM 395223.3  |             |         |
| chr7       | 7788436   | 7795608   | XM 394701       |                   | 7173   |        |         |    | 7173           |    |        | 0.362609787   | 0.049219186 | 0.149907775  | 0.035973229 | 0.1095643239 | 0.377201922 | 0.051465228  | 0.144806338  | 0.037614813  | 0.105890095  | XM 394701.3  |             |         |
| chr1       | 7525895   | 7541546   | XM 396869       |                   | 15652  |        |         |    | 15119          |    |        | 0.236920431   | 0.013958719 | 0.996420318  | 0.019118815 | 0.136475227  | 0.305330728 | 0.019063639  | 0.819658389  | 0.026352677  | 0.173057184  | XM 396869.3  |             |         |
| chrUn      | 4529703   | 4533669   | AmelGUn WGA468  | 2.506983.506983.m | 3967   |        |         |    | 3967           |    |        | 0.201411646   | 0.012607161 | 0.1244745672 | 0.013615734 | 0.1444325325 | 0.255288111 | 0.01686217   | 0.1035778636 | 0.019061584  | 0.170880197  | -            |             |         |
| chrUn      | 41033395  | 41034795  | XM 623426       |                   | 1401   |        |         |    | 1401           |    |        | 0.231263383   | 0.006428571 | 0.488237364  | 0.018571429 | 0.318610266  | 0.008279669 | 0.439941631  | 0.023919043  | 0.1270942489 | 0.98234262   | XM 623426.2  |             |         |
| chrUn      | 1223239   | 1224629   | XM 392437       |                   | 1301   |        |         |    | 1301           |    |        | 0.26594927    | 0.008461538 | 0.484375286  | 0.03        | 0.171733056  | 0.334706488 | 0.011375388  | 0.409420599  | 0.038262668  | 0.137142014  | XM 392437.3  |             |         |
| chr4       | 9776361   | 9782344   | XM 623255       |                   | 5984   |        |         |    | 5853           |    |        | 0.238681018   | 0.007699093 | 0.541047598  | 0.016235441 | 0.12211595   | 0.30079033  | 0.010514019  | 0.459696099  | 0.021495327  | 0.952520792  | XM 623255.2  |             |         |
| chrUn      | 528109539 | 528132027 | AmelGUn WGA2489 | 2.512484.512484.m | 1289   |        |         |    | 1201           |    |        | 0.330488751   | 0.004688751 | 0.895972845  | 0.025837289 | 0.102984572  | 0.304688751 | 0.004688751  | 0.895972845  | 0.025837289  | 0.102984572  | -            |             |         |
| chr8       | 6027280   | 6028216   | XM 395323       |                   | 937    |        |         |    | 937            |    |        | 0.31696095    | 0.011752137 | 0.475265396  | 0.04257265  | 0.993736738  | 0.320043103 | 0.01866235   | 0.470705291  | 0.024811219  | 0.984201972  | XM 395323.2  |             |         |
| chrUn      | 22302406  | 22304072  | XM 623381       |                   | 1667   |        |         |    | 1667           |    |        | 0.24535093    | 0.012004802 | 0.1261068472 | 0.018607443 | 0.727665131  | 0.306358382 | 0.015754561  | 0.694075759  | 0.025704809  | 0.132439396  | -            |             |         |
| chr15      | 5713150   | 5722806   | XM 392090       |                   | 9657   |        |         |    | 9657           |    |        | 0.322046184   | 0.038525269 | 0.47873686   | 0.02475145  | 0.955594343  | 0.351890513 | 0.043250785  | 0.139970633  | 0.027787467  | 0.899273705  | XM 392090.2  |             |         |
| chr16      | 59897     | 94816     | XM 394114       |                   | 34920  |        |         |    | 34920          |    |        | 0.33943299    | 0.052607463 | 0.1827441167 | 0.030699619 | 0.1066421846 | 0.361819347 | 0.032968748  | 0.1790871692 | 0.032969502  | 0.1007794645 | -            |             |         |
| chr9       | 4181539   | 4199073   | XM 392546       |                   | 17535  |        |         |    | 17535          |    |        | 0.293860648   | 0.034960648 | 0.1625005599 | 0.02640584  | 0.127336945  | 0.337889207 | 0.041975818  | 0.1467585896 | 0.031464688  | 0.100088937  | XM 392546.3  |             |         |
| chr5       | 12678041  | 12685644  | AmelG5 WGA174   | 2.515114.515114.m | 7604   |        |         |    | 7554           |    |        | 0.271908922   | 0.02065678  | 0.1121793828 | 0.021583686 | 0.17213073   | 0.302546793 | 0.023703248  | 0.103940943  | 0.04780668   | 0.108678818  | -            |             |         |
| chr5       | 7932041   | 7932041   | AmelG5 WGA163   | 2.504424.504424.m | 1936   |        |         |    | 1936           |    |        | 0.49293717567 | 0.02065678  | 0.1121793828 | 0.021583686 | 0.17213073   | 0.302546793 | 0.023703248  | 0.103940943  | 0.04780668   | 0.108678818  | -            |             |         |
| chrUn      | 35161748  | 35163992  | AmelGUn WGA748  | 2.507843.507843.m | 2245   |        |         |    | 2245           |    |        | 0.30113586    | 0.015597148 | 0.68910818   | 0.018270945 | 0.80724101   | 0.321444582 | 0.016891892  | 0.654837322  | 0.019787645  | 0.767095043  | -            |             |         |
| chr6       | 7309644   | 7341550   | AmelG6 WGA199   | 2.502093.502093.m | 31907  |        |         |    | 30972          |    |        | 0.378341728   | 0.063061027 | 0.176079941  | 0.037617049 | 0.103459877  | 0.394173358 | 0.066842991  | 0.723993147  | 0.036484743  | 0.107626923  | -            |             |         |
| chr12      | 7199378   | 7200193   | XM 623302       |                   | 816    |        |         |    | 816            |    |        | 0.236519608   | 0.013496933 | 0.978977505  | 0.013496933 | 0.978977505  | 0.026850508 | 0.016034985  | 0.903625868  | 0.016034985  | 0.903625868  | -            |             |         |
| chrUn      | 143565873 | 143566950 | AmelGUn WGA3039 | 2.508645.508645.m | 1078   |        |         |    | 1078           |    |        | 0.384045527   | 0.033426184 | 0.936452108  | 0.03992572  | 0.118540017  | 0.384045527 | 0.033426184  | 0.936452108  | 0.03992572   | 0.118540017  | -            |             |         |
| chrUn      | 292633440 | 292634943 | AmelGUn WGA6913 | 2.508841.508841.m | 1504   |        |         |    | 1504           |    |        | 0.290558511   | 0.018629409 | 0.888355229  | 0.017964072 | 0.856682     |             |              |              |              |              |              |             |         |

| chromosome | start     | end       | ID                                | length | valid length without Ns | non-repetitive nr length | qcContent   | cpaContent  | cpaQ/E      | qpcContent  | apccQ/E     | nrCpGcontent | nrCpGContent | nrCpGQ/E    | nrGpCContent | nrGpCQ/E    | RefSeqID    | version |
|------------|-----------|-----------|-----------------------------------|--------|-------------------------|--------------------------|-------------|-------------|-------------|-------------|-------------|--------------|--------------|-------------|--------------|-------------|-------------|---------|
| chr3       | 11225093  | 11228248  | AmelG3 WGA122 2.507918.507918.m   | 3156   | 3156                    | 2936                     | 0.317490494 | 0.037400951 | 1.485493179 | 0.026941363 | 0.070058646 | 0.335149864  | 0.039904502  | 1.422204591 | 0.02899045   | 1.033094788 | -           | -       |
| chrUn      | 10781399  | 10783028  | XM 624558                         | 1630   | 1630                    | 1158                     | 0.207975546 | 0.007366483 | 0.702512827 | 0.016574586 | 1.580653861 | 0.262521589  | 0.010434783  | 0.622477327 | 0.022608696  | 1.348700874 | XM 624558.2 | -       |
| chrUn      | 169637834 | 169642819 | XM 395332                         | 4986   | 4986                    | 3474                     | 0.228239069 | 0.010631896 | 0.81965798  | 0.0222668   | 0.716642185 | 0.305699482  | 0.014484357  | 0.622372506 | 0.030996524  | 1.331877162 | XM 395332.2 | -       |
| chrUn      | 22174539  | 22175520  | XM 624967                         | 862    | 862                     | 806                      | 0.250591945 | 0.002535863 | 0.02752936  | 0.02752936  | 1.81222764  | 0.2952836    | 0.003740868  | 0.17148025  | 0.036658325  | 1.594062584 | XM 624967.2 | -       |
| chr5       | 12696645  | 12698664  | XM 623733                         | 2020   | 2020                    | 1972                     | 0.501980198 | 0.081228331 | 1.295248814 | 0.049034175 | 1.781885589 | 0.512677485  | 0.083248731  | 1.273199091 | 0.050253807  | 0.7685777   | XM 623733.2 | -       |
| chrUn      | 11596267  | 11600962  | XM 397121                         | 4696   | 4696                    | 3546                     | 0.243611584 | 0.008093717 | 0.545232478 | 0.02385165  | 1.607858672 | 0.299210378  | 0.010767923  | 0.481124562 | 0.01373036   | 1.84105134  | XM 397121.2 | -       |
| chr5       | 11671392  | 11676633  | XM 394596                         | 5242   | 5242                    | 4708                     | 0.292827165 | 0.013547033 | 0.632240369 | 0.028811296 | 1.344623884 | 0.355919765  | 0.016936672  | 0.535003231 | 0.036327933  | 1.147543163 | XM 394596.3 | -       |
| chrUn      | 74687557  | 74690888  | XM 397187                         | 3332   | 3332                    | 2000                     | 0.260204082 | 0.008405884 | 0.496626197 | 0.026418493 | 1.56082519  | 0.305185185  | 0.010420543  | 0.447626282 | 0.031633792  | 1.358865499 | -           | -       |
| chrUn      | 5014169   | 5018190   | XM 395582                         | 4022   | 4022                    | 3185                     | 0.258577822 | 0.011688635 | 0.713717941 | 0.022382492 | 1.366693929 | 0.30455259   | 0.014807813  | 0.651401302 | 0.027410208  | 1.20578539  | XM 395582.3 | -       |
| chr4       | 9140288   | 9141410   | XM 394528                         | 1123   | 1123                    | 1088                     | 0.327693678 | 0.013368984 | 0.504564219 | 0.024955437 | 0.941853208 | 0.337316176  | 0.013812155  | 0.491701409 | 0.025782689  | 0.91784263  | XM 394528.3 | -       |
| chr6       | 7736956   | 7739103   | AmelG6 WGA200 2.502595.502595.m   | 2148   | 2148                    | 2080                     | 0.422253259 | 0.063809967 | 1.432165197 | 0.042805489 | 0.961745971 | 0.434197887  | 0.065897066  | 1.398578109 | 0.044252044  | 0.939191139 | -           | -       |
| chrUn      | 90759163  | 90759866  | AmelGUn WGA1735 2.504965.504965.m | 704    | 704                     | 647                      | 0.319602273 | 0.015672226 | 0.612850928 | 0.025604552 | 1.002846974 | 0.340030912  | 0.017054264  | 0.590005638 | 0.027906977  | 1.965463771 | -           | -       |
| chr8       | 3387995   | 3388934   | XM 624377                         | 940    | 940                     | 940                      | 0.324468085 | 0.009584665 | 0.36782842  | 0.036208733 | 1.26826516  | 0.324468085  | 0.009584665  | 0.36782842  | 0.036208733  | 1.38826516  | XM 624377.1 | -       |
| chrUn      | 183716192 | 183721007 | AmelGUn WGA4079 2.509984.509984.m | 4816   | 4816                    | 3441                     | 0.26910299  | 0.018899273 | 1.059269776 | 0.020353063 | 1.140752067 | 0.331008428  | 0.026292726  | 0.966323529 | 0.027753433  | 1.02000817  | -           | -       |
| chrUn      | 5517940   | 5587723   | AmelGUn WGA473 2.502642.502642.m  | 69784  | 65775                   | 60034                    | 0.336343596 | 0.04506614  | 1.59354277  | 0.027611373 | 0.976340644 | 0.354599061  | 0.048517115  | 1.543441477 | 0.029691073  | 0.944541585 | -           | -       |
| chr12      | 185074    | 580290    | XM 393833                         | 395217 | 385137                  | 363962                   | 0.424939697 | 0.065659162 | 1.454629682 | 0.040749396 | 0.902772427 | 0.431701516  | 0.068704894  | 1.474758934 | 0.042687775  | 0.9162983   | XM 393833.3 | -       |
| chrUn      | 25924421  | 25925754  | XM 001011566.1                    | 1334   | 1334                    | 976                      | 0.317841079 | 0.041260315 | 1.646929127 | 0.027710804 | 1.922771084 | 0.399590164  | 0.05338809   | 1.343412235 | 0.040041068  | 1.059951976 | -           | -       |
| chrUn      | 107330477 | 107334885 | AmelGUn WGA2101 2.508976.508976.m | 4409   | 4409                    | 2672                     | 0.205488773 | 0.007295528 | 0.629526246 | 0.011343013 | 1.082128979 | 0.281437126  | 0.010150376  | 0.519717883 | 0.018045113  | 0.023942904 | -           | -       |
| chr6       | 12006870  | 12011604  | XM 394621                         | 4735   | 4735                    | 3544                     | 0.262302006 | 0.012674271 | 0.743111814 | 0.025982256 | 1.523379218 | 0.329006772  | 0.016718617  | 0.62487096  | 0.034003967  | 1.270923986 | XM 394621.2 | -       |
| chr10      | 1190501   | 1197263   | AmelG10 WGA310 2.509036.509036.m  | 6763   | 6763                    | 5753                     | 0.463255952 | 0.06462585  | 1.694533701 | 0.032682638 | 0.630094618 | 0.43455884   | 0.069415449  | 1.472111408 | 0.034466764  | 0.730074834 | -           | -       |
| chr5       | 9663159   | 9666055   | XM 392374                         | 2897   | 2897                    | 1982                     | 0.244735934 | 0.011049724 | 0.73916795  | 0.024171271 | 1.616929891 | 0.321392533  | 0.015720081  | 0.610599312 | 0.031947262  | 1.240895376 | XM 392374.3 | -       |
| chr8       | 4584966   | 4586642   | XM 624138                         | 1677   | 1677                    | 1437                     | 0.259988074 | 0.012529833 | 0.741493856 | 0.021479714 | 1.271132325 | 0.283233133  | 0.01406564   | 0.701344452 | 0.023442733  | 1.16890742  | XM 624138.2 | -       |
| chr1       | 8014702   | 8017604   | XM 394210                         | 2903   | 2903                    | 2655                     | 0.387530141 | 0.059614059 | 1.59280203  | 0.034803584 | 0.299097163 | 0.41920904   | 0.065283019  | 1.490708235 | 0.038113208  | 0.802797871 | XM 394210.3 | -       |
| chr12      | 6021514   | 6024091   | XM 393528                         | 2578   | 2578                    | 2024                     | 0.227272727 | 0.013353116 | 0.47258219  | 0.022255193 | 1.373930365 | 0.340715503  | 0.022298456  | 0.7786331   | 0.036878216  | 1.87739358  | XM 393528.2 | -       |
| chrUn      | 4189577   | 41909995  | XM 392702                         | 14618  | 14329                   | 12921                    | 0.304487403 | 0.029594472 | 1.281554406 | 0.02275424  | 0.985346076 | 0.329463664  | 0.032728401  | 1.211064616 | 0.025127966  | 0.928905385 | XM 392702.3 | -       |
| chr6       | 4005680   | 4006580   | AmelG10 1575.1                    | 2690   | 2690                    | 2039                     | 0.243122677 | 0.032903284 | 1.032496788 | 0.032903284 | 1.032496788 | 0.329006772  | 0.032903284  | 1.032496788 | 0.329006772  | 1.032496788 | -           | -       |
| chrUn      | 71091716  | 71093393  | XM 392607                         | 1678   | 1678                    | 990                      | 0.205601707 | 0.005366726 | 0.513713519 | 0.013714967 | 1.28178688  | 0.398998989  | 0.00917431   | 0.42068635  | 0.028426096  | 0.92895509  | XM 392607.3 | -       |
| chr8       | 2615312   | 2616450   | AmelG8 WGA258 2.501771.501771.m   | 1139   | 1139                    | 634                      | 0.172080773 | 0.002632604 | 0.359130803 | 0.007908612 | 0.737392409 | 0.242902208  | 0.00477707   | 0.324079658 | 0.011146497  | 0.756185869 | -           | -       |
| chrUn      | 4149872   | 4152762   | XM 395800                         | 2891   | 2841                    | 1715                     | 0.199929602 | 0.006340261 | 0.636247533 | 0.013032758 | 1.307842152 | 0.274052478  | 0.00996483   | 0.532606574 | 0.01992966   | 1.065213148 | XM 395800.3 | -       |
| chrUn      | 27342027  | 27358958  | XM 395654                         | 16932  | 16593                   | 14363                    | 0.276622672 | 0.030377916 | 1.588694676 | 0.02465192  | 1.289238339 | 0.304393233  | 0.034415358  | 1.48645491  | 0.027364747  | 1.181927636 | XM 395654.3 | -       |
| chrUn      | 10656858  | 10659600  | XM 395716                         | 2743   | 2743                    | 2007                     | 0.291651476 | 0.0134938   | 0.303630326 | 0.034466244 | 1.63048327  | 0.360737419  | 0.018        | 0.553354108 | 0.044        | 1.352643374 | XM 395716.3 | -       |
| chrUn      | 123105743 | 123109944 | XM 392932                         | 4202   | 4202                    | 3380                     | 0.270585436 | 0.018567008 | 1.01493458  | 0.022137586 | 1.20114306  | 0.323372781  | 0.023166023  | 0.886537082 | 0.027234027  | 1.045695122 | XM 392932.3 | -       |
| chrUn      | 237043327 | 237044329 | AmelGUn WGA5467 2.514841.514841.m | 1003   | 1003                    | 662                      | 0.297108674 | 0.022954092 | 1.053852818 | 0.023952096 | 1.099672506 | 0.418761133  | 0.034954407  | 0.824975967 | 0.036474164  | 0.879627096 | -           | -       |
| chrUn      | 1384433   | 1384433   | XM 394037                         | 1465   | 1465                    | 1160                     | 0.274074074 | 0.01428431  | 0.581394948 | 0.01428431  | 0.581394948 | 0.322142446  | 0.005194805  | 0.322142446 | 0.005194805  | 0.322142446 | -           | -       |
| chrUn      | 4816599   | 4822523   | XM 397593                         | 5925   | 5925                    | 4416                     | 0.261603376 | 0.01806212  | 1.056008006 | 0.018066144 | 1.105346635 | 0.325634058  | 0.02432371   | 0.917614798 | 0.025005683  | 0.943342316 | XM 397593.3 | -       |
| chrUn      | 15067441  | 15073446  | AmelGUn WGA533 2.515508.515508.m  | 6006   | 6006                    | 4715                     | 0.273559774 | 0.016486261 | 0.881350506 | 0.020149875 | 1.07206174  | 0.327041357  | 0.02064269   | 0.77213634  | 0.024686103  | 0.92379541  | -           | -       |
| chrUn      | 269220071 | 269222013 | AmelGUn WGA6302 2.505497.505497.m | 1943   | 1943                    | 1585                     | 0.240864642 | 0.01853759  | 1.286589182 | 0.01853759  | 1.286589182 | 0.279495268  | 0.022828155  | 1.17394295  | 0.022828155  | 1.17394295  | -           | -       |
| chrUn      | 86600793  | 86602457  | XM 396076                         | 1665   | 1665                    | 1319                     | 0.232432432 | 0.008413462 | 0.580019743 | 0.014423077 | 1.143119559 | 0.277482942  | 0.010670732  | 0.580072262 | 0.017530488  | 0.954043387 | -           | -       |
| chr5       | 12938007  | 12939709  | XM 625197                         | 1703   | 1703                    | 1517                     | 0.293012331 | 0.023501763 | 1.096878396 | 0.023236675 | 1.042034476 | 0.305866846  | 0.023825281  | 1.027912593 | 0.022501655  | 0.970866338 | XM 625197.2 | -       |
| chr3       | 9058215   | 9063196   | XM 392383                         | 4982   | 4982                    | 4234                     | 0.29245283  | 0.019273238 | 0.916140041 | 0.025496888 | 1.231796929 | 0.333490789  | 0.022748815  | 0.832317885 | 0.02985782   | 1.094217224 | XM 392383.3 | -       |
| chr5       | 4895789   | 4896324   | AmelG5 WGA159 2.507428.507428.m   | 2124   | 2124                    | 1834                     | 0.241457859 | 0.017039264 | 1.796270968 | 0.017039264 | 1.796270968 | 0.320436915  | 0.017039264  | 1.796270968 | 0.320436915  | 0.017039264 | -           | -       |
| chrUn      | 96722255  | 96730211  | XM 397283                         | 7957   | 7957                    | 6755                     | 0.288927988 | 0.016842634 | 0.808471292 | 0.024007039 | 1.327373259 | 0.368686896  | 0.019887207  | 0.746322981 | 0.028049866  | 0.052649154 | XM 397283.3 | -       |
| chrUn      | 31629248  | 31632885  | XM 395400                         | 3638   | 3638                    | 2526                     | 0.224299065 | 0.011273027 | 0.89632431  | 0.010723123 | 0.856208878 | 0.275930325  | 0.015525478  | 0.781296235 | 0.013535032  | 0.713092667 | XM 395400.3 | -       |
| chr3       | 5414417   | 5416166   | XM 623647                         | 1750   | 1750                    | 1256                     | 0.232       | 0.003430532 | 0.254743295 | 0.01943968  | 1.458845339 | 0.304140127  | 0.004803843  | 0.209592482 | 0.027221777  | 1.187690791 | XM 623647.2 | -       |
| chr11      | 11385684  | 11422406  | AmelG11 WGA371 2.503037.503037.m  | 36723  | 3780                    | 28972                    | 0.31158479  | 0.03974253  | 1.646751382 | 0.025776544 | 1.068063861 | 0.338119564  | 0.044399073  | 1.562842594 | 0.029034156  | 1.021999171 | -           | -       |
| chr3       | 3715792   | 3720425   | XM 624131                         | 4634   | 4634                    | 3498                     | 0.256365991 | 0.027627887 | 1.683369541 | 0.020289229 | 1.236224507 | 0.312750143  | 0.035581062  | 1.457427444 | 0.02697274   | 1.10482403  | XM 624131.2 | -       |
| chrUn      | 86694707  | 86697859  | AmelGUn WGA1654 2.503795.503795.m | 3153   | 3153                    | 1973                     | 0.228355949 | 0.009835025 | 0.96866986  | 0.015862944 | 1.235273968 | 0.320324379  | 0.015832482  | 0.631166982 | 0.024514811  | 0.97290811  | -           | -       |
| chr13      | 8574863   | 8579237   | XM 396534                         | 4375   | 4375                    | 3805                     | 0.261942857 | 0.025377229 | 1.482018549 | 0.01920439  | 1.12152755  | 0.2          |              |             |              |             |             |         |

| chromosome | start     | end       | ID              | lenqth            | valid | length without | Ns | non-repetitive | nr | lenqth | qcContent   | cpaContent  | cpqo/E      | qpcContent  | qpcqo/E      | nrGContent   | nrCpGContent | nrCpGqo/E    | nrGpCContent | nrGpCqo/E    | RefSeqID    | version |
|------------|-----------|-----------|-----------------|-------------------|-------|----------------|----|----------------|----|--------|-------------|-------------|-------------|-------------|--------------|--------------|--------------|--------------|--------------|--------------|-------------|---------|
| chr3       | 10089190  | 10093688  | XM 394965       | 4499              | 4499  |                |    | 3712           |    |        | 0.24761058  | 0.006891952 | 0.45644174  | 0.022899066 | 0.1516564492 | 0.2890625    | 0.008112493  | 0.395785115  | 0.027582477  | 1.345669391  | XM 394965.3 |         |
| chrUn      | 317408458 | 317409564 | AmelGUn WGA7561 | 2.506267.502667.m | 1107  | 1107           |    | 516            |    |        | 0.209575429 | 0.003616637 | 0.32976212  | 0.022603978 | 0.2061013587 | 0.337209302  | 0.005847953  | 0.206697593  | 0.044834308  | 1.584681124  | -           |         |
| chr3       | 8450612   | 8451338   | AmelG3 WGA115   | 2.506079.506079.m | 727   | 727            |    | 607            |    |        | 0.294360385 | 0.023415978 | 1.090494618 | 0.020661157 | 0.062201133  | 0.345963756  | 0.028999174  | 0.094978393  | 0.049479388  | 0.837775053  | -           |         |
| chrUn      | 56715120  | 56718015  | XM 394952       | 2906              | 2906  |                |    | 1966           |    |        | 0.208878183 | 0.00851979  | 0.54063192  | 0.015490534 | 0.143107994  | 0.27347202   | 0.007457651  | 0.384742346  | 0.021494371  | 1.11284469   | XM 394952.3 |         |
| chrUn      | 231714331 | 231735828 | XM 395106       | 21498             | 21498 |                |    | 16916          |    |        | 0.267420225 | 0.02446853  | 1.368692818 | 0.012537889 | 0.204761929  | 0.38401075   | 0.03031022   | 1.188416102  | 0.027107183  | 0.062852861  | XM 395106.3 |         |
| chrUn      | 97861113  | 97863998  | XM 395938       | 2886              | 2886  |                |    | 1986           |    |        | 0.221067221 | 0.010051993 | 0.355856082 | 0.016291161 | 0.135580518  | 0.28801613   | 0.01466869   | 0.1717462651 | 0.023267577  | 1.1368404205 | XM 395938.3 |         |
| chr6       | 6076444   | 6091437   | XM 394648       | 14994             | 14463 |                |    | 13355          |    |        | 0.440365069 | 0.068257261 | 1.408569541 | 0.042392808 | 0.87482865   | 0.446798952  | 0.072093023  | 1.444709326  | 0.045086272  | 0.903507081  | XM 394648.3 |         |
| chrUn      | 14333318  | 14337655  | XM 624172       | 4338              | 4338  |                |    | 3096           |    |        | 0.236284002 | 0.012912151 | 0.931508579 | 0.018907079 | 0.363994705  | 0.302325581  | 0.018164126  | 0.802677032  | 0.025624392  | 1.132347956  | XM 624172.2 |         |
| chrUn      | 678982    | 681177    | AmelGUn WGA457  | 2.508650.508650.m | 2196  | 2196           |    | 2196           |    |        | 0.447176685 | 0.065148064 | 1.320351615 | 0.043735763 | 0.686389896  | 0.453327172  | 0.066142461  | 1.304721458  | 0.04440333   | 0.875896923  | -           |         |
| chrUn      | 253560102 | 253568931 | XM 393094       | 8830              | 8830  |                |    | 4864           |    |        | 0.176670442 | 0.008268207 | 1.062535615 | 0.012911995 | 0.159308531  | 0.257761438  | 0.013594233  | 0.821726927  | 0.022245108  | 1.346444062  | XM 393094.3 |         |
| chr16      | 4645225   | 4648079   | XM 395969       | 2855              | 2791  |                |    | 2192           |    |        | 0.243281978 | 0.010039441 | 0.709076346 | 0.015776264 | 1.114262971  | 0.291970803  | 0.012826386  | 0.633939258  | 0.020155749  | 0.969190263  | XM 395969.3 |         |
| chrUn      | 94931821  | 94941180  | AmelGUn WGA1619 | 2.506633.506633.m | 9360  | 8678           |    | 7661           |    |        | 0.272873934 | 0.026193991 | 1.412358209 | 0.021330014 | 1.189354281  | 0.302440935  | 0.029588898  | 1.294760159  | 0.08815178   | 1.098515178  | -           |         |
| chrUn      | 21844201  | 21859851  | XM 397331       | 15651             | 15601 |                |    | 11152          |    |        | 0.234792641 | 0.023463043 | 1.702957623 | 0.013590897 | 0.253908997  | 0.291158537  | 0.030816363  | 1.454477297  | 0.024508921  | 1.156777266  | XM 397331.3 |         |
| chrUn      | 41001811  | 41002615  | XM 395303       | 805               | 805   |                |    | 542            |    |        | 0.222360248 | 0.001243781 | 0.104161443 | 0.013681592 | 1.14577587   | 0.293357934  | 0.001855288  | 0.090115195  | 0.020408163  | 0.991267142  | XM 395303.3 |         |
| chr10      | 3046635   | 3048630   | XM 393688       | 1996              | 1996  |                |    | 1996           |    |        | 0.317635271 | 0.011528822 | 0.466475174 | 0.026566416 | 1.074921053  | 0.317635271  | 0.011528822  | 0.466475174  | 0.026566416  | 1.074921053  | XM 393688.2 |         |
| chr13      | 2040409   | 2051228   | AmelG13 WGA393  | 2.505549.505549.m | 10820 | 10820          |    | 9728           |    |        | 0.31284658  | 0.040669193 | 1.670033939 | 0.029854885 | 1.225956733  | 0.3727373849 | 0.044096435  | 1.556911616  | 0.032248094  | 1.135858256  | -           |         |
| chrUn      | 70984820  | 70990787  | XM 624243       | 5968              | 5968  |                |    | 4565           |    |        | 0.247821716 | 0.0231272   | 1.520171957 | 0.016591252 | 0.091668391  | 0.299671413  | 0.029689905  | 1.334497951  | 0.021552672  | 0.968746661  | XM 624243.1 |         |
| chr7       | 6559496   | 6574833   | XM 395069       | 15338             | 15172 |                |    | 9514           |    |        | 0.200698655 | 0.013974951 | 1.399531728 | 0.014897825 | 1.439153635  | 0.270128232  | 0.021890663  | 1.211283952  | 0.022948393  | 1.269800084  | XM 395069.2 |         |
| chrUn      | 129498955 | 129502027 | AmelGUn WGA2674 | 2.506473.506473.m | 3073  | 3073           |    | 2724           |    |        | 0.233322486 | 0.009765625 | 0.717576098 | 0.011393229 | 0.837172114  | 0.248531571  | 0.01066951   | 0.690985757  | 0.012509198  | 0.810121232  | -           |         |
| chr1       | 20630170  | 20632512  | XM 623237       | 2343              | 2343  |                |    | 1752           |    |        | 0.220230474 | 0.00853971  | 0.747449116 | 0.014095921 | 1.22862648   | 0.335908921  | 0.011461318  | 0.669838     | 0.018338109  | 1.0717408    | -           |         |
| chr15      | 6405125   | 6407796   | XM 623054       | 2672              | 2672  |                |    | 1777           |    |        | 0.23532934  | 0.00935979  | 0.705329252 | 0.017970977 | 1.35423165   | 0.310073157  | 0.01300905   | 0.563266882  | 0.0260181    | 1.126533765  | XM 623054.2 |         |
| chrUn      | 80771579  | 80778705  | AmelGUn WGA1539 | 2.509471.509471.m | 7127  | 7077           |    | 5124           |    |        | 0.234318219 | 0.020070671 | 1.037661601 | 0.01639576  | 1.09075674   | 0.306401249  | 0.027249559  | 1.16106364   | 0.02152519   | 0.943886269  | -           |         |
| chrUn      | 239857170 | 239862029 | XM 625126       | 4860              | 4860  |                |    | 4006           |    |        | 0.31255144  | 0.0168759   | 0.693838717 | 0.032105371 | 1.319985852  | 0.363704443  | 0.020045101  | 0.608016508  | 0.03858682   | 1.170431779  | -           |         |
| chrUn      | 178808365 | 178813868 | XM 395875       | 5504              | 5504  |                |    | 3871           |    |        | 0.241642442 | 0.020170816 | 1.391642743 | 0.01853544  | 1.278806844  | 0.310514079  | 0.028022833  | 1.172725898  | 0.025687597  | 1.07499874   | -           |         |
| chrUn      | 11879130  | 11883615  | AmelGUn WGA509  | 2.503816.503816.m | 4486  | 4486           |    | 3489           |    |        | 0.27039679  | 0.026978818 | 1.478390345 | 0.02295644  | 1.221810202  | 0.327314417  | 0.034532374  | 1.292195702  | 0.028489209  | 0.06061454   | -           |         |
| chr11      | 741181    | 74125793  | AmelGUn WGA1387 | 2.514387.514387.m | 52420 | 52420          |    | 4051           |    |        | 0.161145125 | 0.00846153  | 0.419846132 | 0.015984694 | 1.27347302   | 0.495927476  | 0.009817302  | 1.694942598  | 0.045789425  | 1.066072598  | -           |         |
| chr9       | 1339006   | 1341143   | XM 392524       | 2138              | 2138  |                |    | 2027           |    |        | 0.027138707 | 0.027140857 | 0.116549312 | 0.026672906 | 0.097298462  | 0.327577701  | 0.02865612   | 0.298160745  | 0.028162055  | 0.050726939  | XM 392524.2 |         |
| chr13      | 6013447   | 6015232   | XM 393948       | 1786              | 1786  |                |    | 1786           |    |        | 0.536954087 | 0.093557423 | 1.30358218  | 0.065546218 | 0.913551566  | 0.536954087  | 0.093557423  | 1.30358218   | 0.065546218  | 0.913551566  | XM 393948.3 |         |
| chrUn      | 196397087 | 196398409 | AmelGUn WGA4406 | 2.510486.510486.m | 1323  | 1323           |    | 1235           |    |        | 0.264315949 | 0.003025719 | 0.227873285 | 0.02874327  | 1.064796211  | 0.305402426  | 0.003329634  | 0.015115517  | 0.038845727  | 1.1263014369 | -           |         |
| chrUn      | 141983071 | 141983810 | XM 624385       | 740               | 740   |                |    | 655            |    |        | 0.336486486 | 0.01623816  | 0.603093885 | 0.037889309 | 1.02719065   | 0.378625954  | 0.018404908  | 0.541129773  | 0.042944785  | 1.262636136  | -           |         |
| chr8       | 5077693   | 5088944   | XM 396156       | 12051             | 10702 |                |    | 9716           |    |        | 0.305737245 | 0.012806132 | 0.580818067 | 0.026827444 | 1.453093542  | 0.329456566  | 0.013820132  | 0.512109843  | 0.029393564  | 1.08918846   | -           |         |
| chrUn      | 229518507 | 229520058 | AmelGUn WGA5271 | 2.505488.505488.m | 1552  | 1552           |    | 1552           |    |        | 0.555412371 | 0.01934236  | 0.250818399 | 0.063185042 | 0.819340105  | 0.555412371  | 0.01934236   | 0.250818399  | 0.063185042  | 0.819340105  | -           |         |
| chr1       | 2475170   | 24728730  | AmelG1 WGA64    | 2.504525.504525.m | 3561  | 3561           |    | 2980           |    |        | 0.351586633 | 0.050561798 | 1.63646818  | 0.039044944 | 1.263717095  | 0.068274832  | 0.0606469    | 1.452321414  | 0.046495957  | 1.173377417  | -           |         |
| chrUn      | 1973389   | 1990607   | XM 624747       | 1730              | 1730  |                |    | 6256           |    |        | 0.196013289 | 0.0035414   | 1.178921933 | 0.023265226 | 1.365913585  | 0.329824872  | 0.031761155  | 1.179503019  | 0.029067127  | 1.150020365  | XM 624984.2 |         |
| chrUn      | 94857791  | 94859613  | AmelGUn WGA2037 | 2.506304.506304.m | 1823  | 1823           |    | 1368           |    |        | 0.292375206 | 0.006037322 | 0.2989452   | 0.024149286 | 1.1957808    | 0.342105263  | 0.007352941  | 0.260516293  | 0.031617647  | 1.120220059  | -           |         |
| chr8       | 9311621   | 9313642   | XM 393035       | 2022              | 2022  |                |    | 1360           |    |        | 0.214638971 | 0.013854257 | 1.247445689 | 0.016203848 | 0.278676471  | 0.287626171  | 0.019202363  | 1.038864259  | 0.021480021  | 1.158733212  | XM 393035.3 |         |
| chrUn      | 88482364  | 88496141  | AmelGUn WGA1689 | 2.507636.507636.m | 13778 | 12935          |    | 9017           |    |        | 0.24545806  | 0.012758061 | 0.85015431  | 0.019330395 | 1.288112713  | 0.314406122  | 0.017715877  | 0.720564967  | 0.027075209  | 1.101240798  | -           |         |
| chr10      | 2247025   | 2247866   | AmelG10 WGA313  | 2.508870.508870.m | 842   | 842            |    | 842            |    |        | 0.22592152  | 0.009797387 | 1.186446118 | 0.01902497  | 1.09911252   | 0.279097387  | 0.01902497   | 1.186446118  | 0.027907387  | 0.99911252   | -           |         |
| chr16      | 562944    | 563997    | XM 624042       | 1054              | 1054  |                |    | 699            |    |        | 0.005698006 | 0.005698006 | 0.551346198 | 0.021842355 | 2.113493759  | 0.27939342   | 0.008645533  | 0.46888846   | 0.031700288  | 1.719257688  | XM 624042.2 |         |
| chrUn      | 99936828  | 99942904  | AmelGUn WGA1921 | 2.505635.505635.m | 1077  | 6027           |    | 2936           |    |        | 0.168890387 | 0.00879668  | 1.233652753 | 0.012448133 | 1.745730982  | 0.261929981  | 0.016173434  | 0.46888846   | 0.031700288  | 1.719257688  | -           |         |
| chr12      | 6128340   | 6129016   | XM 394416       | 1670              | 1670  |                |    | 1315           |    |        | 0.177884615 | 0.00684615  | 0.36846152  | 0.014718336 | 0.311556     | 0.002737006  | 0.002737006  | 0.002737006  | 0.002737006  | 0.002737006  | XM 624016.2 |         |
| chr6       | 4757522   | 4856630   | XM 394341       | 89009             | 87433 |                |    | 81353          |    |        | 0.469731108 | 0.083189404 | 0.508153165 | 0.052546696 | 0.952626927  | 0.504040871  | 0.087533548  | 1.551578805  | 0.055524093  | 0.984194151  | XM 394341.3 |         |
| chr2       | 28502129  | 2853077   | XM 397305       | 2859              | 2859  |                |    | 2078           |    |        | 0.226302303 | 0.009097271 | 0.727755069 | 0.013645906 | 1.091368209  | 0.28825794   | 0.012083122  | 0.598619666  | 0.01848966   | 0.933959     | XM 397305.3 |         |
| chrUn      | 68157005  | 68158350  | XM 624613       | 1346              | 1346  |                |    | 837            |    |        | 0.187221397 | 0.005204461 | 0.264768434 | 0.015613383 | 1.4784305302 | 0.272401434  | 0.008433735  | 0.479578998  | 0.021686747  | 1.232303137  | XM 624613.2 |         |
| chr4       | 2807432   | 2809175   | XM 394681       | 1744              | 1744  |                |    | 1623           |    |        | 0.547018349 | 0.092369478 | 1.235309008 | 0.076878944 | 1.028415386  | 0.05690008   | 0.098826436  | 1.25941133   | 0.082149475  | 1.046885668  | XM 394681.2 |         |
| chr15      | 2092022   |           |                 |                   |       |                |    |                |    |        |             |             |             |             |              |              |              |              |              |              |             |         |

| chromosome | start     | end       | ID              | length            | valid length | length without Ns | nr     | length | qContent    | cpaContent  | cpqo/E      | qpcContent  | apcqo/E     | nrGContent  | nrCpGContent | nrCpGO/E    | nrGpCContent | nrGpCO/E    | RefSeqID    | version |
|------------|-----------|-----------|-----------------|-------------------|--------------|-------------------|--------|--------|-------------|-------------|-------------|-------------|-------------|-------------|--------------|-------------|--------------|-------------|-------------|---------|
| chr10      | 4250846   | 4252129   | AmelG10 WGA319  | 2.513213.513213.m | 1284         | 1284              | 1047   | 1047   | 0.223520249 | 0.008573655 | 0.690504493 | 0.020265004 | 1.639192438 | 0.262655205 | 0.010556622  | 0.621029511 | 0.024952015  | 1.467887936 | -           |         |
| chr14      | 1776686   | 181332    | AmelG14 WGA409  | 2.508893.508893.m | 3667         | 3667              | 3480   | 3480   | 0.288519226 | 0.037643208 | 1.809473898 | 0.020185488 | 0.970279597 | 0.301724138 | 0.039723661  | 1.745781897 | 0.021301094  | 0.936143964 | -           |         |
| chrUn      | 248393371 | 248394726 | AmelGUn WGA5761 | 2.510502.510502.m | 1356         | 1356              | 1356   | 1356   | 0.447640118 | 0.026568266 | 0.530988746 | 0.068634686 | 1.371720926 | 0.447640118 | 0.026568266  | 0.530988746 | 0.068634686  | 1.371720926 | -           |         |
| chrUn      | 16485124  | 164854482 | AmelGUn WGA3592 | 2.504973.504973.m | 3259         | 3259              | 2584   | 2584   | 0.220312979 | 0.008901166 | 0.737412807 | 0.012277471 | 1.017121113 | 0.011587764 | 0.014594561  | 0.674594561 | 0.015138752  | 0.907213348 | -           |         |
| chrUn      | 277603931 | 277607393 | XM 62331369     |                   | 3463         | 3463              | 2582   | 2582   | 0.270574646 | 0.014731369 | 0.824623381 | 0.026863085 | 1.503724499 | 0.343532146 | 0.019495253  | 0.676514962 | 0.035797665  | 1.24478753  | -           |         |
| chr9       | 1336679   | 1339242   | AmelG9 WGA285   | 2.514634.514634.m | 2564         | 2564              | 2471   | 2471   | 0.310842434 | 0.036285603 | 0.503395912 | 0.023410066 | 0.971223169 | 0.319303926 | 0.037697608  | 1.483396081 | 0.024321038  | 0.95702973  | -           |         |
| chr1       | 7815329   | 7820676   | XM 393456       |                   | 5348         | 5348              | 4688   | 4688   | 0.282535527 | 0.028240135 | 1.433875193 | 0.021133346 | 1.073032429 | 0.313779863 | 0.031644216  | 1.304481905 | 0.023496795  | 0.987175496 | -           |         |
| chr4       | 7640163   | 7758006   | XM 624079       |                   | 117844       | 117844            | 110746 | 110746 | 0.360927067 | 0.05343623  | 1.64162003  | 0.029141566 | 0.8952611   | 0.369638633 | 0.05568112   | 1.63047265  | 0.030412613  | 0.90552037  | -           |         |
| chr11      | 6347058   | 6349626   | AmelG11 WGA357  | 2.503368.503368.m | 2569         | 2569              | 2162   | 2162   | 0.240560529 | 0.003115265 | 1.25160406  | 0.014797508 | 1.024119283 | 0.270582794 | 0.003708855  | 0.202889459 | 0.017153454  | 0.963836348 | -           |         |
| chr5       | 5041907   | 5049581   | XM 624754       |                   | 7675         | 7675              | 7552   | 7552   | 0.081107492 | 0.081443836 | 1.533987562 | 0.051211884 | 0.964571379 | 0.406318859 | 0.051941169  | 0.051941169 | 0.939396562  | -           |             |         |
| chr12      | 5797514   | 5803519   | XM 623429       |                   | 6006         | 6006              | 6006   | 6006   | 0.285880786 | 0.030641132 | 1.503891452 | 0.024979184 | 1.225998467 | 0.318467696 | 0.03497038   | 1.382618576 | 0.028473151  | 1.125738622 | XM 623429.2 |         |
| chrUn      | 39136157  | 39137962  | XM 395123       |                   | 1804         | 1804              | 1506   | 1506   | 0.347560976 | 0.0284919   | 0.937175781 | 0.01885746  | 0.624783854 | 0.379814077 | 0.03195739   | 0.891387634 | 0.022636485  | 0.631399574 | XM 395123.3 |         |
| chr6       | 13379809  | 13410537  | XM 392823       |                   | 30729        | 30729             | 26563  | 26563  | 0.024904813 | 0.042274147 | 1.602396877 | 0.027898977 | 1.051265258 | 0.270886927 | 0.050148703  | 0.047868927 | 1.561783     | 0.937803033 | XM 392823.3 |         |
| chrUn      | 307645576 | 307646479 | AmelGUn WGA7306 | 2.506005.506005.m | 904          | 904               | 904    | 904    | 0.360619469 | 0.019933555 | 0.629128333 | 0.040974529 | 1.293208241 | 0.360619469 | 0.019933555  | 0.629128333 | 0.040974529  | 1.293208241 | -           |         |
| chrUn      | 34030947  | 34045597  | AmelGUn WGA736  | 2.511683.511683.m | 14651        | 14651             | 10300  | 10300  | 0.247062058 | 0.018215562 | 1.196788144 | 0.01931537  | 1.269047051 | 0.312330097 | 0.025078064  | 1.031367386 | 0.025569664  | 1.051432899 | -           |         |
| chr4       | 2295694   | 2299873   | AmelG4 WGA131   | 2.504748.504748.m | 4180         | 4130              | 3228   | 3228   | 0.127428571 | 0.021354651 | 0.676715936 | 0.026162791 | 1.334045512 | 0.333023544 | 0.015877958  | 0.578186492 | 0.03362391   | 1.023494925 | -           |         |
| chrUn      | 19766494  | 19770430  | XM 394852       |                   | 3937         | 3937              | 2779   | 2779   | 0.24485469  | 0.023119919 | 1.544646651 | 0.019817073 | 1.323982844 | 0.316660669 | 0.031476122  | 1.259045026 | 0.026772793  | 1.07491861  | XM 394852.3 |         |
| chr14      | 6369219   | 6371313   | XM 625234       |                   | 2095         | 2095              | 1449   | 1449   | 0.260143198 | 0.015281757 | 0.909451055 | 0.016714422 | 0.994712091 | 0.325741891 | 0.022176022  | 0.836942737 | 0.024255024  | 0.915406118 | XM 625234.2 |         |
| chr1       | 25135502  | 25199858  | XM 394171       |                   | 64357        | 64357             | 61205  | 61205  | 0.447736843 | 0.075859283 | 1.514211477 | 0.049480328 | 0.967705819 | 0.449783514 | 0.0748489751 | 1.551987136 | 0.049730897  | 0.983334909 | XM 394171.3 |         |
| chr15      | 4253533   | 4256118   | XM 392637       |                   | 2586         | 2586              | 1736   | 1736   | 0.233565352 | 0.00967118  | 0.710066749 | 0.017408124 | 1.278120148 | 0.301267281 | 0.013888889  | 0.612372555 | 0.025462963  | 0.912683018 | XM 392637.3 |         |
| chr9       | 6114213   | 6129852   | XM 624676       |                   | 15640        | 15590             | 13193  | 13193  | 0.299743425 | 0.033166538 | 1.478226799 | 0.04286279  | 1.106750234 | 0.336542106 | 0.038777372  | 1.371951902 | 0.029273114  | 1.035689181 | -           |         |
| chrUn      | 24823404  | 24826177  | AmelGUn WGA625  | 2.501322.501322.m | 2774         | 2774              | 965    | 965    | 0.354565032 | 0.011539849 | 1.727290633 | 0.011900469 | 1.781268467 | 0.310880829 | 0.030334728  | 1.273803137 | 0.032467778  | 1.361680491 | -           |         |
| chr15      | 6416079   | 6417336   | XM 393440       |                   | 1258         | 1258              | 716    | 716    | 0.244833068 | 0.011137629 | 0.754349393 | 0.026252983 | 1.75252146  | 0.292510121 | 0.013221382  | 0.617634655 | 0.033536585  | 1.56784179  | -           |         |
| chr14      | 3407311   | 3408026   | AmelG14 WGA411  | 2.521586.521586.m | 716          | 716               | 716    | 716    | 0.293296089 | 0.012587413 | 0.84307264  | 0.033566434 | 1.560819371 | 0.293296089 | 0.012587413  | 0.585307264 | 0.033566434  | 1.560819371 | -           |         |
| chrUn      | 35124473  | 35125915  | XM 392884       |                   | 1443         | 1443              | 709    | 709    | 0.196426195 | 0.006241331 | 0.653985821 | 0.013716144 | 1.380636734 | 0.314527504 | 0.012765957  | 0.517934611 | 0.021276596  | 0.863223602 | XM 392884.3 |         |
| chrUn      | 57840493  | 57840548  | XM 393517       |                   | 3890         | 3890              | 3030   | 3030   | 0.300589972 | 0.013337078 | 0.98511647  | 0.024951908 | 1.24581766  | 0.323905498 | 0.017451137  | 0.679991963 | 0.021745113  | 0.879991963 | XM 625148.2 |         |
| chr1       | 2142716   | 2152630   | XM 392165       |                   | 9915         | 9915              | 6752   | 6752   | 0.125644152 | 0.008069397 | 0.691962813 | 0.016338794 | 1.383925265 | 0.258989336 | 0.019180079  | 0.587184917 | 0.022778026  | 1.122991153 | XM 392165.3 |         |
| chr11      | 10617529  | 10621282  | NM 001011599.1  |                   | 3754         | 3754              | 2810   | 2810   | 0.287693127 | 0.022382094 | 1.102389252 | 0.019184652 | 0.944905073 | 0.306405694 | 0.029967892  | 1.277007385 | 0.024616482  | 1.048970352 | -           |         |
| chr14      | 1486639   | 1492519   | XM 392022       |                   | 5881         | 5881              | 5784   | 5784   | 0.473558919 | 0.068197279 | 1.219444919 | 0.053571429 | 0.957918079 | 0.488299817 | 0.070905093  | 1.19254606  | 0.059451889  | 0.942445431 | XM 392022.3 |         |
| chrUn      | 87168392  | 87176250  | XM 624269       |                   | 7859         | 7744              | 4468   | 4468   | 0.251539754 | 0.026233129 | 1.679688061 | 0.022542705 | 1.438456265 | 0.351835273 | 0.040692446  | 1.334400418 | 0.034172662  | 1.120604156 | XM 624269.1 |         |
| chr7       | 3439323   | 3442534   | AmelG7 WGA224   | 2.503602.503602.m | 3212         | 3056              | 2418   | 2418   | 0.254908377 | 0.007531107 | 0.471856795 | 0.026482353 | 1.335518957 | 0.306865183 | 0.009551495  | 0.413234734 | 0.020974508  | 1.013937108 | -           |         |
| chrUn      | 226709127 | 226710947 | XM 394910       |                   | 1821         | 1821              | 1222   | 1222   | 0.232839099 | 0.015934066 | 1.21903877  | 0.01978022  | 1.315289493 | 0.323240589 | 0.023868313  | 0.946068099 | 0.028806584  | 1.141806326 | -           |         |
| chrUn      | 13923690  | 13929702  | XM 393517       |                   | 6013         | 6013              | 4530   | 4530   | 0.24014635  | 0.014803726 | 1.035973396 | 0.018463074 | 1.292056707 | 0.296688742 | 0.019494905  | 0.832485804 | 0.024590164  | 1.126711282 | -           |         |
| chrUn      | 27380136  | 27380136  | AmelGUn WGA656  | 2.505666.505666.m | 618          | 618               | 418    | 418    | 0.319873887 | 0.027299757 | 1.719446653 | 0.024951908 | 1.24581766  | 0.323905498 | 0.017451137  | 0.679991963 | 0.021745113  | 0.879991963 | -           |         |
| chr7       | 37291640  | 37295774  | XM 392847       |                   | 4135         | 4135              | 3538   | 3538   | 0.26070133  | 0.01572327  | 0.93075567  | 0.0205612   | 1.217144511 | 0.293103448 | 0.018424036  | 0.86478867  | 0.023809524  | 1.11757305  | XM 392847.3 |         |
| chr13      | 8032367   | 8057551   | AmelG13 WGA404  | 2.501879.501879.m | 23385        | 22885             | 20850  | 20850  | 0.352545335 | 0.041602937 | 1.339344823 | 0.031289604 | 1.007323271 | 0.371798561 | 0.045520092  | 1.317629972 | 0.034031917  | 0.98509189  | -           |         |
| chr1       | 4980550   | 4982277   | XM 394227       |                   | 5728         | 5728              | 4431   | 4431   | 0.257332402 | 0.028636248 | 1.73345663  | 0.019731098 | 1.194393898 | 0.316858497 | 0.039686612  | 1.475928426 | 0.025641026  | 1.023189645 | XM 394227.3 |         |
| chr5       | 9302253   | 9309905   | AmelG5 WGA167   | 2.514444.514444.m | 7653         | 7592              | 6622   | 6622   | 0.306506849 | 0.018577075 | 0.965858075 | 0.026482235 | 1.335518957 | 0.342494915 | 0.021205695  | 0.728113632 | 0.030142381  | 1.033946152 | -           |         |
| chrUn      | 109135999 | 109135052 | XM 396092       |                   | 4054         | 4054              | 2701   | 2701   | 0.219042921 | 0.007648655 | 0.652514743 | 0.014063657 | 1.199785172 | 0.286930766 | 0.010784678  | 0.537517271 | 0.019338044  | 0.963824072 | XM 396092.3 |         |
| chr8       | 2674445   | 2675313   | AmelG8 WGA259   | 2.502272.502272.m | 869          | 869               | 755    | 755    | 0.223245109 | 0.001152074 | 0.039669375 | 0.014976959 | 1.271701871 | 0.001329787 | 0.0048130074 | 0.021782724 | 0.039690964  | -           |             |         |
| chr14      | 4981454   | 4981986   | XM 391986       |                   | 2701         | 2701              | 2281   | 2281   | 0.29615815  | 0.014962813 | 0.68765815  | 0.012984753 | 1.233905579 | 0.322805193 | 0.017129113  | 0.621835283 | 0.018711711  | 0.931996.3  | -           |         |
| chr16      | 16759522  | 16762877  | XM 396057       |                   | 3356         | 3356              | 2961   | 2961   | 0.329261025 | 0.025037258 | 0.927183495 | 0.035466449 | 1.315309951 | 0.365079365 | 0.028087908  | 0.845550943 | 0.040270728  | 1.224139304 | XM 396057.3 |         |
| chr8       | 4458817   | 4459690   | AmelG8 WGA263   | 2.503776.503776.m | 2874         | 2874              | 2293   | 2293   | 0.253653445 | 0.023668307 | 0.475174163 | 0.019143752 | 1.193234271 | 0.30266027  | 0.029772329  | 1.30838934  | 0.02408056   | 1.055020461 | -           |         |
| chrUn      | 79566188  | 79569487  | XM 624167       |                   | 3300         | 3300              | 2379   | 2379   | 0.229393939 | 0.011518642 | 0.876024943 | 0.013034253 | 0.991291382 | 0.295922657 | 0.016047297  | 0.733719022 | 0.01731498   | 0.971644208 | XM 624167.1 |         |
| chr16      | 4532496   | 4572986   | AmelG16 WGA454  | 2.508570.508570.m | 40491        | 40391             | 35344  | 35344  | 0.357975787 | 0.056254333 | 1.756748678 | 0.034985399 | 1.092555406 | 0.384223631 | 0.061484359  | 1.669292731 | 0.037396884  | 0.951780444 | -           |         |
| chrUn      | 13926139  | 13929702  | XM 623422       |                   | 3564         | 3564              | 3070   | 3070   | 0.287037037 | 0.017962391 | 0.881709696 | 0.026943587 | 1.322564544 | 0.324104235 | 0.020901372  | 0.80522448  | 0.031352057  | 1.02783672  | XM 623422.2 |         |
| chrUn      | 21943635  | 21964381  | Am              |                   |              |                   |        |        |             |             |             |             |             |             |              |             |              |             |             |         |

| chromosome | start     | end       | ID              | lenqth | valid  | lenqth | without | Ns     | non-repetitive | nr          | lenqth       | qcContent   | cpaContent  | cpaQc/E     | qpcContent  | qpcQc/E     | nrGcContent | nrGcQcContent | nrCpGContent | nrCpGQc/E   | nrGpCContent | nrGpCQc/E   | RefSeqID | version |
|------------|-----------|-----------|-----------------|--------|--------|--------|---------|--------|----------------|-------------|--------------|-------------|-------------|-------------|-------------|-------------|-------------|---------------|--------------|-------------|--------------|-------------|----------|---------|
| chr5       | 12519525  | 12536064  | XM 625059       | 11080  | 11080  |        |         | 9300   | 0.019947649    | 0.867558515 | 0.0299097473 | 0.299097473 | 0.019947649 | 0.867558515 | 0.01904504  | 0.867558515 | 0.329139785 | 0.02274197    | 0.851817835  | 0.02155637  | 0.80741027   | XM 625059.2 |          |         |
| chr11      | 6031820   | 6110384   | AmelG11 WGA357  | 78565  | 77168  |        |         | 73807  | 0.395955208    | 0.060689709 | 0.060689709  | 0.395955208 | 0.060689709 | 0.154905388 | 0.036144266 | 0.922549975 | 0.403037652 | 0.062840863   | 1.548184774  | 0.037741171 | 0.923161992  |             |          |         |
| chr11      | 9931769   | 9941461   | XM 392840       | 9693   | 9693   |        |         | 6713   | 0.249252038    | 0.019284973 | 0.019284973  | 0.249252038 | 0.019284973 | 0.154905388 | 0.036144266 | 0.922549975 | 0.403037652 | 0.062840863   | 1.548184774  | 0.037741171 | 0.923161992  | XM 392840.3 |          |         |
| chr1       | 10345484  | 10366023  | XM 392136       | 21540  | 20540  |        |         | 19690  | 0.340550168    | 0.04112871  | 0.04112871   | 0.340550168 | 0.04112871  | 0.154905388 | 0.036144266 | 0.922549975 | 0.403037652 | 0.062840863   | 1.548184774  | 0.037741171 | 0.923161992  |             |          |         |
| chr5       | 9446432   | 9448112   | AmelG5 WGA167   | 1681   | 1681   |        |         | 1338   | 0.259964037    | 0.007738095 | 0.007738095  | 0.259964037 | 0.007738095 | 0.154905388 | 0.036144266 | 0.922549975 | 0.403037652 | 0.062840863   | 1.548184774  | 0.037741171 | 0.923161992  |             |          |         |
| chrUn      | 121558198 | 121559113 | AmelGUn WGA2468 | 916    | 916    |        |         | 916    | 0.388646288    | 0.034972678 | 0.034972678  | 0.388646288 | 0.034972678 | 0.154905388 | 0.036144266 | 0.922549975 | 0.403037652 | 0.062840863   | 1.548184774  | 0.037741171 | 0.923161992  |             |          |         |
| chrUn      | 84362529  | 84383218  | AmelGUn WGA1608 | 20190  | 20190  |        |         | 17496  | 0.256315007    | 0.027937389 | 0.027937389  | 0.256315007 | 0.027937389 | 0.154905388 | 0.036144266 | 0.922549975 | 0.403037652 | 0.062840863   | 1.548184774  | 0.037741171 | 0.923161992  |             |          |         |
| chrUn      | 80574976  | 80575989  | XM 395809       | 1014   | 1014   |        |         | 756    | 0.301775148    | 0.007897335 | 0.007897335  | 0.301775148 | 0.007897335 | 0.154905388 | 0.036144266 | 0.922549975 | 0.403037652 | 0.062840863   | 1.548184774  | 0.037741171 | 0.923161992  | XM 395809.2 |          |         |
| chr5       | 2232941   | 2248454   | XM 397368       | 15514  | 15514  |        |         | 11071  | 0.230114735    | 0.01811384  | 0.01811384   | 0.230114735 | 0.01811384  | 0.154905388 | 0.036144266 | 0.922549975 | 0.403037652 | 0.062840863   | 1.548184774  | 0.037741171 | 0.923161992  | XM 397368.3 |          |         |
| chr13      | 1066239   | 1067835   | XM 624847       | 1597   | 1547   |        |         | 1396   | 0.321913381    | 0.025889968 | 0.025889968  | 0.321913381 | 0.025889968 | 0.154905388 | 0.036144266 | 0.922549975 | 0.403037652 | 0.062840863   | 1.548184774  | 0.037741171 | 0.923161992  |             |          |         |
| chr11      | 2810064   | 2813268   | XM 395484       | 3205   | 3205   |        |         | 2445   | 0.23400936     | 0.005617978 | 0.005617978  | 0.23400936  | 0.005617978 | 0.154905388 | 0.036144266 | 0.922549975 | 0.403037652 | 0.062840863   | 1.548184774  | 0.037741171 | 0.923161992  |             |          |         |
| chr1       | 20130730  | 20300369  | XM 392112       | 169640 | 169149 |        |         | 161564 | 0.43456361     | 0.07674777  | 0.07674777   | 0.43456361  | 0.07674777  | 0.154905388 | 0.036144266 | 0.922549975 | 0.403037652 | 0.062840863   | 1.548184774  | 0.037741171 | 0.923161992  |             |          |         |
| chrUn      | 30153077  | 30154283  | XM 392983       | 1207   | 1207   |        |         | 905    | 0.203232115    | 0.008291874 | 0.008291874  | 0.203232115 | 0.008291874 | 0.154905388 | 0.036144266 | 0.922549975 | 0.403037652 | 0.062840863   | 1.548184774  | 0.037741171 | 0.923161992  |             |          |         |
| chr3       | 8605042   | 8612177   | AmelG3 WGA115   | 7136   | 7136   |        |         | 5581   | 0.254063901    | 0.021583742 | 0.021583742  | 0.254063901 | 0.021583742 | 0.154905388 | 0.036144266 | 0.922549975 | 0.403037652 | 0.062840863   | 1.548184774  | 0.037741171 | 0.923161992  |             |          |         |
| chrUn      | 276103946 | 276110002 | XM 395752       | 6057   | 6057   |        |         | 5431   | 0.286280337    | 0.047225892 | 0.047225892  | 0.286280337 | 0.047225892 | 0.154905388 | 0.036144266 | 0.922549975 | 0.403037652 | 0.062840863   | 1.548184774  | 0.037741171 | 0.923161992  | XM 395752.3 |          |         |
| chr7       | 536854    | 538395    | AmelG7 WGA215   | 1542   | 1542   |        |         | 1249   | 0.278210117    | 0.023361454 | 0.023361454  | 0.278210117 | 0.023361454 | 0.154905388 | 0.036144266 | 0.922549975 | 0.403037652 | 0.062840863   | 1.548184774  | 0.037741171 | 0.923161992  |             |          |         |
| chrUn      | 74108535  | 74111727  | AmelGUn WGA1403 | 3193   | 3143   |        |         | 1806   | 0.203627108    | 0.00254696  | 0.00254696   | 0.203627108 | 0.00254696  | 0.154905388 | 0.036144266 | 0.922549975 | 0.403037652 | 0.062840863   | 1.548184774  | 0.037741171 | 0.923161992  |             |          |         |
| chrUn      | 273612647 | 273619201 | AmelGUn WGA6419 | 6555   | 6554   |        |         | 6504   | 0.358101922    | 0.047619048 | 0.047619048  | 0.358101922 | 0.047619048 | 0.154905388 | 0.036144266 | 0.922549975 | 0.403037652 | 0.062840863   | 1.548184774  | 0.037741171 | 0.923161992  |             |          |         |
| chr11      | 11343589  | 11364859  | XM 393375       | 21271  | 21271  |        |         | 18858  | 0.312538198    | 0.04141984  | 0.04141984   | 0.312538198 | 0.04141984  | 0.154905388 | 0.036144266 | 0.922549975 | 0.403037652 | 0.062840863   | 1.548184774  | 0.037741171 | 0.923161992  | XM 393375.3 |          |         |
| chr9       | 4010473   | 4015874   | XM 394805       | 5402   | 5502   |        |         | 5168   | 0.38819559     | 0.060544344 | 0.060544344  | 0.38819559  | 0.060544344 | 0.154905388 | 0.036144266 | 0.922549975 | 0.403037652 | 0.062840863   | 1.548184774  | 0.037741171 | 0.923161992  | XM 394805.3 |          |         |
| chrUn      | 7996413   | 8018523   | XM 623327       | 22111  | 22111  |        |         | 17762  | 0.282031568    | 0.032338308 | 0.032338308  | 0.282031568 | 0.032338308 | 0.154905388 | 0.036144266 | 0.922549975 | 0.403037652 | 0.062840863   | 1.548184774  | 0.037741171 | 0.923161992  |             |          |         |
| chrUn      | 242636342 | 242637749 | XM 624364       | 1408   | 1408   |        |         | 1069   | 0.224431818    | 0.010660981 | 0.010660981  | 0.224431818 | 0.010660981 | 0.154905388 | 0.036144266 | 0.922549975 | 0.403037652 | 0.062840863   | 1.548184774  | 0.037741171 | 0.923161992  | XM 624364.2 |          |         |
| chrUn      | 93691259  | 93693491  | AmelGUn WGA1791 | 2233   | 1665   |        |         | 1275   | 0.203003003    | 0.001803969 | 0.001803969  | 0.203003003 | 0.001803969 | 0.154905388 | 0.036144266 | 0.922549975 | 0.403037652 | 0.062840863   | 1.548184774  | 0.037741171 | 0.923161992  |             |          |         |
| chr8       | 6217363   | 6255287   | AmelG8 WGA267   | 37925  | 37925  |        |         | 35118  | 0.424917601    | 0.076205402 | 0.076205402  | 0.424917601 | 0.076205402 | 0.154905388 | 0.036144266 | 0.922549975 | 0.403037652 | 0.062840863   | 1.548184774  | 0.037741171 | 0.923161992  |             |          |         |
| chrUn      | 77828748  | 77832066  | XM 624839       | 3319   | 3319   |        |         | 2228   | 0.257005122    | 0.025316456 | 0.025316456  | 0.257005122 | 0.025316456 | 0.154905388 | 0.036144266 | 0.922549975 | 0.403037652 | 0.062840863   | 1.548184774  | 0.037741171 | 0.923161992  |             |          |         |
| chrUn      | 44015266  | 44015266  | XM 624839       | 3319   | 3319   |        |         | 2228   | 0.257005122    | 0.025316456 | 0.025316456  | 0.257005122 | 0.025316456 | 0.154905388 | 0.036144266 | 0.922549975 | 0.403037652 | 0.062840863   | 1.548184774  | 0.037741171 | 0.923161992  |             |          |         |
| chrUn      | 309584162 | 309585151 | AmelGUn WGA7357 | 990    | 990    |        |         | 990    | 0.315151515    | 0.024266936 | 0.024266936  | 0.315151515 | 0.024266936 | 0.154905388 | 0.036144266 | 0.922549975 | 0.403037652 | 0.062840863   | 1.548184774  | 0.037741171 | 0.923161992  |             |          |         |
| chr6       | 12905814  | 12908154  | XM 396436       | 2341   | 2341   |        |         | 2004   | 0.245194361    | 0.011538462 | 0.011538462  | 0.245194361 | 0.011538462 | 0.154905388 | 0.036144266 | 0.922549975 | 0.403037652 | 0.062840863   | 1.548184774  | 0.037741171 | 0.923161992  | XM 396436.3 |          |         |
| chr16      | 4397725   | 4465614   | XM 395421       | 67890  | 67840  |        |         | 49734  | 0.224118514    | 0.022170465 | 0.022170465  | 0.224118514 | 0.022170465 | 0.154905388 | 0.036144266 | 0.922549975 | 0.403037652 | 0.062840863   | 1.548184774  | 0.037741171 | 0.923161992  |             |          |         |
| chr15      | 6083306   | 6105145   | XM 001011565.1  | 21840  | 21433  |        |         | 19335  | 0.33264438     | 0.040875367 | 0.040875367  | 0.33264438  | 0.040875367 | 0.154905388 | 0.036144266 | 0.922549975 | 0.403037652 | 0.062840863   | 1.548184774  | 0.037741171 | 0.923161992  |             |          |         |
| chrUn      | 263192886 | 263195823 | XM 396164       | 2938   | 2938   |        |         | 2318   | 0.267188564    | 0.009874021 | 0.009874021  | 0.267188564 | 0.009874021 | 0.154905388 | 0.036144266 | 0.922549975 | 0.403037652 | 0.062840863   | 1.548184774  | 0.037741171 | 0.923161992  | XM 396164.3 |          |         |
| chr1       | 2367403   | 2369968   | AmelG1 WGA3     | 2566   | 2566   |        |         | 1798   | 0.247077163    | 0.015594542 | 0.015594542  | 0.247077163 | 0.015594542 | 0.154905388 | 0.036144266 | 0.922549975 | 0.403037652 | 0.062840863   | 1.548184774  | 0.037741171 | 0.923161992  |             |          |         |
| chrUn      | 47647476  | 47657907  | XM 624462       | 1162   | 1162   |        |         | 1162   | 0.314113597    | 0.009474591 | 0.009474591  | 0.314113597 | 0.009474591 | 0.154905388 | 0.036144266 | 0.922549975 | 0.403037652 | 0.062840863   | 1.548184774  | 0.037741171 | 0.923161992  | XM 624462.1 |          |         |
| chr2       | 18450268  | 18452663  | AmelG2 WGA167   | 2396   | 2396   |        |         | 2068   | 0.275047329    | 0.02881902  | 0.02881902   | 0.275047329 | 0.02881902  | 0.154905388 | 0.036144266 | 0.922549975 | 0.403037652 | 0.062840863   | 1.548184774  | 0.037741171 | 0.923161992  |             |          |         |
| chr10      | 1209436   | 1210269   | XM 395111       | 834    | 834    |        |         | 734    | 0.292565947    | 0.026410564 | 0.026410564  | 0.292565947 | 0.026410564 | 0.154905388 | 0.036144266 | 0.922549975 | 0.403037652 | 0.062840863   | 1.548184774  | 0.037741171 | 0.923161992  |             |          |         |
| chr4       | 4912723   | 4918168   | XM 623605       | 5446   | 5446   |        |         | 4443   | 0.237605582    | 0.006795225 | 0.006795225  | 0.237605582 | 0.006795225 | 0.154905388 | 0.036144266 | 0.922549975 | 0.403037652 | 0.062840863   | 1.548184774  | 0.037741171 | 0.923161992  | XM 395111.3 |          |         |
| chr5       | 13247422  | 13249545  | XM 396005       | 2124   | 2124   |        |         | 1713   | 0.224105461    | 0.009891663 | 0.009891663  | 0.224105461 | 0.009891663 | 0.154905388 | 0.036144266 | 0.922549975 | 0.403037652 | 0.062840863   | 1.548184774  | 0.037741171 | 0.923161992  |             |          |         |
| chrUn      | 69300036  | 69302181  | XM 623700       | 2146   | 2146   |        |         | 1635   | 0.246039143    | 0.009324009 | 0.009324009  | 0.246039143 | 0.009324009 | 0.154905388 | 0.036144266 | 0.922549975 | 0.403037652 | 0.062840863   | 1.548184774  | 0.037741171 | 0.923161992  | XM 623700.2 |          |         |
| chrUn      | 14755284  | 14765685  | XM 395506       | 10402  | 10402  |        |         | 7349   | 0.246176601    | 0.029227959 | 0.029227959  | 0.246176601 | 0.029227959 | 0.154905388 | 0.036144266 | 0.922549975 | 0.403037652 | 0.062840863   | 1.548184774  | 0.037741171 | 0.923161992  |             |          |         |
| chr15      | 5849735   | 5850862   | AmelG15 WGA438  | 1128   | 1128   |        |         | 853    | 0.282907601    | 0.011535049 | 0.011535049  | 0.282907601 | 0.011535049 | 0.154905388 | 0.036144266 | 0.922549975 | 0.403037652 | 0.062840863   | 1.548184774  | 0.          |              |             |          |         |

| chromosome | start     | end       | ID               | length | valid length without Ns | non-repetitive nr length | qcContent   | cpaContent  | cpqQ/E      | qpcContent  | qpcQ/E      | nrGContent   | nrCpGContent | nrCpGQ/E    | nrGpCContent | nrGpCQ/E     | RefSeqID    | version |
|------------|-----------|-----------|------------------|--------|-------------------------|--------------------------|-------------|-------------|-------------|-------------|-------------|--------------|--------------|-------------|--------------|--------------|-------------|---------|
| chr13      | 1299964   | 1308710   | XM 624954        | 8747   | 8747                    | 8568                     | 0.49651309  | 0.082437686 | 1.337713422 | 0.059789765 | 0.970352454 | 0.500583567  | 0.0839659    | 1.340954372 | 0.061076725  | 0.975409091  | XM 624954.2 |         |
| chr14      | 2711856   | 2714025   | AmelG14 WGA411   | 2120   | 2120                    | 2054                     | 0.356603774 | 0.024965061 | 1.352227697 | 0.041548631 | 0.037487682 | 0.366114898  | 0.044368601  | 1.325173617 | 0.0429059    | 1.281486575  |             |         |
| chr16      | 2021942   | 2031466   | XM 396342        | 9325   | 8490                    | 7674                     | 0.313898704 | 0.034401508 | 1.050333040 | 0.023444863 | 0.957539643 | 0.33971853   | 0.38000444   | 1.324024908 | 0.025858691  | 0.900882927  | XM 396342.3 |         |
| chr8       | 4814362   | 4817985   | XM 393480        | 3624   | 3624                    | 3136                     | 0.201467991 | 0.05132818  | 1.56039087  | 0.037261922 | 1.458009442 | 0.36234898   | 0.017802813  | 0.551681051 | 0.042838875  | 1.330083944  | XM 393480.3 |         |
| chrUn      | 234544655 | 234545526 | AmelGUn WGA5402  | 872    | 872                     | 756                      | 0.324889908 | 0.011481055 | 0.394844481 | 0.036793938 | 0.26350234  | 0.353174603  | 0.013262599  | 0.042907823 | 0.038461538  | 1.246153846  |             |         |
| chr3       | 8777177   | 8792137   | XM 392863        | 4421   | 4421                    | 3708                     | 0.273693734 | 0.023076923 | 1.258296759 | 0.023303167 | 0.136273002 | 0.36612729   | 0.027589938  | 1.124494102 | 0.027860427  | 1.03518554   | XM 392863.3 |         |
| chr11      | 153032    | 156480    | XM 391880        | 3449   | 3449                    | 3185                     | 0.312554364 | 0.036832947 | 1.521243371 | 0.024941995 | 1.030133306 | 0.333124019  | 0.039635105  | 1.441721984 | 0.027052532  | 0.984032465  |             |         |
| chr1       | 6277967   | 6279172   | XM 625025        | 1206   | 1206                    | 945                      | 0.258706468 | 0.009128631 | 0.553785574 | 0.025726141 | 1.560668435 | 0.31005291   | 0.011689692  | 0.498147883 | 0.031880978  | 1.358585135  | XM 625025.2 |         |
| chrUn      | 243053469 | 243055843 | XM 624466        | 2375   | 2375                    | 1636                     | 0.216       | 0.00631845  | 0.547549644 | 0.01600674  | 1.387125764 | 0.278117359  | 0.009236453  | 0.485264802 | 0.022783251  | 1.19698651   | XM 624466.2 |         |
| chr8       | 6595450   | 6596779   | XM 624592        | 1330   | 1330                    | 1330                     | 0.426315789 | 0.048908954 | 1.089034124 | 0.039127163 | 0.8712273   | 0.426315789  | 0.048908954  | 1.089034124 | 0.039127163  | 0.8712273    |             |         |
| chr5       | 7952174   | 7980981   | XM 392366        | 28808  | 28708                   | 27900                    | 0.368294552 | 0.059292806 | 1.194917905 | 0.031179237 | 0.919816901 | 0.375734767  | 0.060838684  | 1.724109265 | 0.032033576  | 0.907800456  | XM 392366.3 |         |
| chr10      | 6825903   | 6826436   | AmelG10 WGA325   | 534    | 534                     | 444                      | 0.290262172 | 0.00505818  | 0.268126567 | 0.026266417 | 1.251257311 | 0.34009009   | 0.006802721  | 0.236518734 | 0.031746032  | 1.103754094  |             |         |
| chr5       | 8859277   | 8865926   | AmelG5 WGA166    | 6650   | 6650                    | 6043                     | 0.264365002 | 0.008723116 | 0.50443468  | 0.022409385 | 1.295897874 | 0.286281648  | 0.009613791  | 0.474345498 | 0.024874977  | 1.218577226  |             |         |
| chr4       | 4665783   | 4673886   | AmelG4 WGA137    | 8104   | 8104                    | 7831                     | 0.364264561 | 0.049611255 | 1.496146248 | 0.035418981 | 1.068144212 | 0.374281701  | 0.051380368  | 1.467617783 | 0.036682004  | 1.047776875  |             |         |
| chrUn      | 134088748 | 134090536 | AmelGUn WGA2790  | 1789   | 1789                    | 1719                     | 0.310229178 | 0.017337808 | 0.724942743 | 0.03803132  | 1.590196985 | 0.321698662  | 0.018065268  | 0.702101255 | 0.03962704   | 1.540093075  |             |         |
| chr3       | 1070759   | 1099688   | AmelG3 WGA99     | 28930  | 28930                   | 25088                    | 0.380884895 | 0.061011442 | 1.632556757 | 0.037747589 | 1.040992622 | 0.417769452  | 0.068802941  | 1.577332207 | 0.041873102  | 0.959955954  |             |         |
| chr11      | 507353    | 512469    | XM 623345        | 5117   | 5117                    | 4220                     | 0.274184092 | 0.026778733 | 1.435874072 | 0.021305708 | 1.142410758 | 0.314691943  | 0.031844106  | 1.294164625 | 0.024952471  | 1.014084221  |             |         |
| chr5       | 12725894  | 12729417  | XM 623877        | 3524   | 3524                    | 2740                     | 0.227582758 | 0.005968029 | 0.468685395 | 0.017598638 | 1.384235473 | 0.278467153  | 0.007695126  | 0.404022121 | 0.02235251   | 1.173588065  | XM 623877.2 |         |
| chr5       | 11524019  | 11526345  | XM 395117        | 2327   | 2327                    | 1885                     | 0.218736571 | 0.005159071 | 0.436036792 | 0.010748065 | 0.908409982 | 0.25835438   | 0.006389776  | 0.387511744 | 0.012779553  | 0.775023489  | XM 395117.3 |         |
| chrUn      | 250798468 | 250803930 | AmelGUn WGA5823  | 5463   | 5463                    | 5119                     | 0.023857859 | 0.024166972 | 0.887135212 | 0.0281948   | 1.03499108  | 0.346747412  | 0.025605942  | 0.854423549 | 0.030101642  | 1.00436843   |             |         |
| chr1       | 14620812  | 14776137  | AmelG1 WGA41     | 155326 | 150011                  | 138915                   | 0.309390645 | 0.038278469 | 1.600115835 | 0.024292362 | 1.015468844 | 0.32669677   | 0.04115259   | 1.540167197 | 0.026146713  | 0.97856076   |             |         |
| chr1       | 8215340   | 8216824   | XM 392143        | 1485   | 1485                    | 1289                     | 0.254545455 | 0.015498652 | 0.958521903 | 0.022911051 | 1.416945422 | 0.282389449  | 0.017898833  | 0.898250767 | 0.026459144  | 1.327848959  | XM 392143.3 |         |
| chr4       | 3860326   | 4000252   | XM 394495        | 139927 | 138020                  | 128634                   | 0.362135922 | 0.053849219 | 1.642706723 | 0.032011013 | 0.967517532 | 0.378181507  | 0.057405129  | 1.605821401 | 0.034086485  | 0.953517712  | XM 394495.3 |         |
| chrUn      | 85940684  | 85943773  | XM 623275        | 3090   | 3090                    | 1748                     | 0.185436893 | 0.003561023 | 0.41426434  | 0.010683069 | 1.242787303 | 0.281464531  | 0.00575374   | 0.290511193 | 0.018411968  | 0.929635819  | XM 623275.1 |         |
| chr2       | 3841427   | 3935295   | XM 394328        | 93869  | 92767                   | 88360                    | 0.475416905 | 0.088192491 | 1.560993599 | 0.05116264  | 0.950570911 | 0.480149389  | 0.091470462  | 1.587216239 | 0.03036694   | 0.91973214   | XM 394328.3 |         |
| chrUn      | 82005499  | 82010493  | AmelGUn WGA37019 | 206    | 206                     | 164                      | 0.205658583 | 0.002125924 | 0.337219322 | 0.022525024 | 1.337908187 | 0.331790818  | 0.019614069  | 0.337908187 | 0.019614069  | 0.337908187  |             |         |
| chr18      | 18784373  | 16790442  | AmelGUn WGA549   | 2070   | 2070                    | 1197                     | 0.185990338 | 0.002899953 | 0.337274357 | 0.01256457  | 0.461380138 | 0.274853801  | 0.00505476   | 0.269458497 | 0.02106351   | 1.122743737  |             |         |
| chrUn      | 26536154  | 26540210  | XM 624561        | 4057   | 4057                    | 3130                     | 0.23662085  | 0.011587771 | 0.845270594 | 0.021942801 | 1.600618785 | 0.285303514  | 0.014753047  | 0.74574394  | 0.027902502  | 1.410428755  | XM 624561.2 |         |
| chr10      | 1467734   | 1469675   | XM 623784        | 1942   | 1942                    | 1781                     | 0.453656025 | 0.074703761 | 0.84735329  | 0.041215868 | 0.818622505 | 0.448062886  | 0.07709623   | 1.546664602 | 0.01643219   | 0.835424675  | XM 623784.1 |         |
| chr15      | 1520993   | 1528687   | AmelG10 WGA311   | 7695   | 7695                    | 6630                     | 0.289538661 | 0.032622823 | 1.556890269 | 0.02185339  | 1.011048262 | 0.328054299  | 0.037850114  | 1.407096704 | 0.024678274  | 0.917427051  |             |         |
| chr1       | 4346080   | 4355586   | XM 392161        | 9507   | 9507                    | 7706                     | 0.273798254 | 0.028929097 | 0.94542088  | 0.018935409 | 1.011758458 | 0.317674539  | 0.035444358  | 1.408741363 | 0.032647396  | 1.001180136  | XM 392161.3 |         |
| chr2       | 1531062   | 13704149  | XM 396406        | 83088  | 52255                   | 40608                    | 0.23246933  | 0.030412065 | 1.611572271 | 0.02469333  | 1.190677058 | 0.322547281  | 0.038580438  | 1.484148895 | 0.027824231  | 1.070299684  | XM 396406.3 |         |
| chrUn      | 15120907  | 15122765  | AmelGUn WGA534   | 1589   | 1385                    | 691                      | 0.18393502  | 0.005061466 | 0.601997783 | 0.006507592 | 0.77399715  | 0.280755233  | 0.00729927   | 0.371840689 | 0.010218978  | 0.520576964  |             |         |
| chr7       | 2040184   | 2041551   | XM 396518        | 1368   | 1368                    | 1368                     | 0.24469496  | 0.00474524  | 0.903490897 | 0.021228182 | 1.302118624 | 0.2813718624 | 0.0213718624 | 1.302118624 | 0.0213718624 | 1.302118624  | XM 396518.3 |         |
| chrUn      | 21841191  | 21842061  | XM 623101        | 871    | 871                     | 788                      | 0.313432836 | 0.028735632 | 1.14939123  | 0.031034483 | 1.289942529 | 0.340101523  | 0.031847134  | 1.126411861 | 0.034394904  | 1.216524809  |             |         |
| chr1       | 4995269   | 5001248   | XM 392154        | 5980   | 5980                    | 4957                     | 0.279431438 | 0.02207727  | 1.13175126  | 0.020792554 | 1.031954814 | 0.026321118  | 0.013315423  | 0.024701357 | 0.067848958  | XM 392154.3  |             |         |
| chr4       | 2223403   | 2237301   | XM 623199        | 13899  | 13899                   | 13147                    | 0.399021512 | 0.068786876 | 1.728124347 | 0.039214275 | 0.985175491 | 0.408914581  | 0.071972582  | 1.721764149 | 0.041203351  | 0.985687201  | XM 623199.2 |         |
| chrUn      | 12059059  | 12062879  | XM 624274        | 3821   | 3821                    | 3628                     | 0.25778592  | 0.007329843 | 0.445521337 | 0.02408377  | 1.638355823 | 0.267640573  | 0.052386313  | 0.017307265 | 0.025386313  | 0.624274.2   | XM 624274.2 |         |
| chr4       | 901028    | 902055    | XM 395145        | 1028   | 1028                    | 812                      | 0.226653696 | 0.018500487 | 1.473768921 | 0.017526777 | 1.396202135 | 0.267241397  | 0.023485785  | 1.359305774 | 0.022246991  | 1.287763364  | XM 395145.3 |         |
| chr7       | 1305290   | 1315589   | XM 392438        | 10300  | 10300                   | 9567                     | 0.434368932 | 0.071754539 | 1.521297247 | 0.048062919 | 1.019001539 | 0.451134107  | 0.076633166  | 1.506203771 | 0.051612228  | 1.014442084  | XM 392438.3 |         |
| chr2       | 444009    | 444193    | XM 392192        | 1974   | 1974                    | 1644                     | 0.455915357 | 0.017676927 | 1.047697849 | 0.02361804  | 1.458810069 | 0.412456701  | 0.075297894  | 1.433024018 | 0.039239765  | 0.88165442   | XM 392192.2 |         |
| chr12      | 8582758   | 8586267   | XM 623303        | 3510   | 3510                    | 3153                     | 0.285185185 | 0.03676261  | 0.880579858 | 0.017668852 | 0.869239932 | 0.313035205  | 0.041056652  | 0.676485519 | 0.019732654  | 0.95925753   | XM 623303.2 |         |
| chr14      | 6433280   | 6547873   | XM 396377        | 114506 | 114284                  | 109148                   | 0.351930279 | 0.04759363  | 1.538649773 | 0.027896395 | 0.601859085 | 0.362379521  | 0.049689954  | 1.51486197  | 0.023795201  | 0.889090613  | XM 396377.2 |         |
| chr1       | 6096834   | 6101833   | AmelG1 WGA16     | 5000   | 5000                    | 4937                     | 0.4532      | 0.070414083 | 1.371888206 | 0.050410082 | 0.982147238 | 0.458375532  | 0.071347111  | 1.358727664 | 0.050871504  | 0.968865465  |             |         |
| chr4       | 731244    | 740528    | XM 396349        | 9285   | 9285                    | 8671                     | 0.367797523 | 0.064304179 | 1.906441784 | 0.03067643  | 0.980364536 | 0.386806597  | 0.068830119  | 1.846063756 | 0.035223467  | 0.944713835  | XM 396349.3 |         |
| chrUn      | 112413126 | 112414434 | XM 623495        | 1309   | 1309                    | 888                      | 0.226126814 | 0.004587156 | 0.360830252 | 0.023700306 | 1.864298935 | 0.302927928  | 0.050662514  | 0.248643589 | 0.033975085  | 0.941861531  | XM 623495.2 |         |
| chr9       | 8562421   | 8667714   | XM 394821        | 141474 | 141374                  | 126419                   | 0.298081684 | 0.03362783  | 1.513908209 | 0.023151849 | 1.04284763  | 0.321383655  | 0.037346504  | 1.446343924 | 0.025629643  | 0.992576927  | XM 394821.3 |         |
| chr11      | 2971978   | 2972951   | AmelG11 WGA354   | 974    | 974                     | 644                      | 0.227926078 | 0.021582734 | 1.678280458 | 0.020554985 | 1.598362341 | 0.307453449  | 0.029827316  | 1.277940242 | 0.031397174  | 1.0435200254 |             |         |
| chr3       | 11213967  | 13218432  | AmelG3 WGA122    | 4466   | 4466                    | 3660                     | 0.229959695 | 0.011949394 | 0.614557671 | 0.014257473 | 1.281845238 | 0.281845238  | 0.028110048  | 1.417873114 | 0.018839712  |              |             |         |

| chromosome | start     | end       | ID                                | length | valid length | length without Ns | non-repetitive | nr length | qcContent   | cpaContent  | cpqo/E       | qpcContent    | qpcq/E       | nrGContent   | nrCpGContent | nrCpGq/E     | nrGpCContent | nrGpCq/E    | RefSeqID    | version |
|------------|-----------|-----------|-----------------------------------|--------|--------------|-------------------|----------------|-----------|-------------|-------------|--------------|---------------|--------------|--------------|--------------|--------------|--------------|-------------|-------------|---------|
| chr1       | 5077682   | 5081801   | XM 625252                         | 4120   | 4120         |                   |                | 3249      | 0.239805825 | 0.020393299 | 0.1419333231 | 0.015780529   | 1.098293572  | 0.28316405   | 0.025332098  | 1.264215734  | 0.019153537  | 0.955870433 | XM 625252.2 | -       |
| chrUn      | 142114933 | 142115621 | AmelGUn WGA3000 2.506808.506808.m | 689    | 689          |                   |                | 689       | 0.380261248 | 0.021802326 | 0.629869876  | 0.046511628   | 1.343722402  | 0.380261248  | 0.021802326  | 0.629869876  | 0.046511628  | 1.343722402 | -           | -       |
| chr10      | 2221165   | 2222935   | XM 624566                         | 1771   | 1771         |                   |                | 1474      | 0.267080745 | 0.023728814 | 0.1341698643 | 0.018079096   | 1.022246585  | 0.308683853  | 0.028629857  | 1.213724934  | 0.021813224  | 0.924748807 | -           | -       |
| chrUn      | 7254492   | 7256894   | XM 396754                         | 1333   | 1333         |                   |                | 1058      | 0.237809452 | 0.004576455 | 0.326496767  | 0.012767263   | 0.924802739  | 0.285490414  | 0.005898042  | 0.381593502  | 0.016144389  | 0.8615789   | XM 396756.3 | -       |
| chrUn      | 16424144  | 16426724  | XM 392658                         | 2581   | 2581         |                   |                | 1458      | 0.189848896 | 0.009689922 | 0.081221582  | 0.01472868023 | 1.643456805  | 0.28600823   | 0.017289073  | 0.851422175  | 0.022130014  | 1.089820385 | XM 392658.3 | -       |
| chrUn      | 28624892  | 28627622  | XM 393540                         | 2731   | 2731         |                   |                | 1958      | 0.285975833 | 0.016117216 | 0.081117216  | 0.034432324   | 1.684119632  | 0.363226453  | 0.021651561  | 0.656540005  | 0.046827795  | 1.095185816 | XM 393540.3 | -       |
| chr1       | 13083417  | 13087307  | XM 397116                         | 3891   | 3891         |                   |                | 3310      | 0.266512465 | 0.012339332 | 0.698947226  | 0.021079692   | 1.194034844  | 0.304531722  | 0.014242424  | 0.617809671  | 0.024484845  | 1.077880703 | XM 397116.3 | -       |
| chr11      | 3521566   | 3531874   | XM 391913                         | 10309  | 10309        |                   |                | 10309     | 0.390144534 | 0.059856422 | 1.573589861  | 0.037640663   | 0.408887966  | 0.039859179  | 1.5310669    | 0.040266361  | 0.963451854  | -           | -           | -       |
| chrUn      | 67986663  | 67988828  | XM 392793                         | 2166   | 2166         |                   |                | 1462      | 0.236868827 | 0.024942263 | 1.751242516  | 0.025866051   | 1.81610335   | 0.315358362  | 0.037011652  | 1.488891371  | 0.037970553  | 1.516463433 | XM 392793.3 | -       |
| chr4       | 2330013   | 2331811   | AmelG4 WGA131 2.505583.505583.m   | 1799   | 1799         |                   |                | 1799      | 0.448582546 | 0.071746385 | 0.01746385   | 0.049499444   | 0.987596784  | 0.456445993  | 0.017504363  | 1.444146691  | 0.051774287  | 0.96439268  | -           | -       |
| chr14      | 5003482   | 5008350   | XM 393964                         | 4869   | 4869         |                   |                | 3634      | 0.281988008 | 0.021774856 | 1.059781258  | 0.019797206   | 1.522438211  | 0.357457347  | 0.029013354  | 0.911302166  | 0.040618956  | 1.275823033 | XM 393964.2 | -       |
| chrUn      | 20571150  | 20593655  | XM 624885                         | 22506  | 20996        |                   |                | 1969      | 0.18565441  | 0.011171104 | 1.293651789  | 0.011575838   | 1.343418012  | 0.261634088  | 0.018043998  | 1.054535383  | 0.018867925  | 1.102706715 | XM 624885.2 | -       |
| chrUn      | 312739978 | 312742561 | XM 623712                         | 2584   | 2584         |                   |                | 2126      | 0.251160991 | 0.010840108 | 0.084914663  | 0.017421063   | 1.105261959  | 0.392508937  | 0.013226264  | 0.616172658  | 0.021256495  | 0.990277487 | XM 623712.2 | -       |
| chr11      | 1517794   | 1523876   | XM 391871                         | 6083   | 6083         |                   |                | 4955      | 0.27322045  | 0.014962183 | 0.809421075  | 0.019730352   | 1.06736845   | 0.321695257  | 0.018424782  | 0.720740738  | 0.024296416  | 0.950427347 | XM 391871.3 | -       |
| chr2       | 3708329   | 3711229   | AmelG2 WGA72 2.500224.500224.m    | 2901   | 2901         |                   |                | 2436      | 0.265770424 | 0.013793103 | 0.786023929  | 0.018275862   | 1.041481706  | 0.305829228  | 0.016069221  | 0.692171406  | 0.021425628  | 0.922895208 | -           | -       |
| chrUn      | 70090677  | 70091250  | XM 395989                         | 574    | 574          |                   |                | 541       | 0.344947737 | 0.006980803 | 0.238169927  | 0.033158813   | 1.1131307151 | 0.340110906  | 0.00742115   | 0.258574962  | 0.029684601  | 1.03429985  | XM 395989.1 | -       |
| chrUn      | 58244887  | 58246606  | AmelGUn WGA1112 2.505624.505624.m | 1720   | 1720         |                   |                | 1347      | 0.216279705 | 0.006399069 | 0.557269624  | 0.012798138   | 1.114539248  | 0.262063846  | 0.008208955  | 0.488309037  | 0.015671642  | 0.93226343  | -           | -       |
| chrUn      | 31576359  | 31578484  | AmelGUn WGA704 2.511347.511347.m  | 2126   | 2126         |                   |                | 1969      | 0.173565381 | 0.009882353 | 1.315670394  | 0.012325944   | 1.62892525   | 0.278443114  | 0.02106319   | 1.090753382  | 0.024072217  | 1.46575294  | -           | -       |
| chr2       | 639805    | 642319    | XM 623930                         | 2515   | 2515         |                   |                | 1969      | 0.236182903 | 0.010342084 | 0.798067665  | 0.013126492   | 1.02323026   | 0.285424073  | 0.012755102  | 0.668980427  | 0.016326531  | 0.856294947 | XM 623930.2 | -       |
| chr9       | 943405    | 944458    | XM 624860                         | 1054   | 1054         |                   |                | 921       | 0.275142315 | 0.007597341 | 0.412734491  | 0.028490028   | 1.575475434  | 0.302931594  | 0.008714597  | 0.302679739  | 0.246597939  | 1.246979201 | XM 624860.1 | -       |
| chrUn      | 42031869  | 42033755  | XM 396531                         | 1887   | 1887         |                   |                | 1684      | 0.272390037 | 0.015376458 | 0.831794108  | 0.020678685   | 1.118619663  | 0.299287411  | 0.017261905  | 0.773973504  | 0.023214286  | 1.048606919 | XM 396531.3 | -       |
| chrUn      | 18489963  | 18494225  | XM 623541                         | 4263   | 4263         |                   |                | 3090      | 0.245132536 | 0.010323792 | 0.692018894  | 0.02158611    | 1.446948596  | 0.308414239  | 0.013988289  | 0.593417133  | 0.02732596   | 1.150923469 | -           | -       |
| chrUn      | 97774261  | 97777019  | XM 623450                         | 2759   | 2759         |                   |                | 2136      | 0.26603842  | 0.007251632 | 0.427201653  | 0.026105874   | 1.537925953  | 0.326779026  | 0.008932769  | 0.350810181  | 0.032910202  | 1.292458561 | -           | -       |
| chrUn      | 146091677 | 146095422 | XM 624906                         | 3746   | 3746         |                   |                | 3136      | 0.299786439 | 0.020026702 | 0.892312885  | 0.029105474   | 1.39682806   | 0.334920635  | 0.022929936  | 0.181060624  | 0.03343949   | 1.193010577 | -           | -       |
| chrUn      | 47248647  | 47250651  | XM 623972                         | 2005   | 2005         |                   |                | 1730      | 0.268329177 | 0.040918164 | 2.273999681  | 0.023453094   | 1.303390061  | 0.304624777  | 0.047646717  | 0.205442603  | 0.026728646  | 1.152483216 | XM 623972.2 | -       |
| chr6       | 5817594   | 5819521   | XM 629525                         | 4151   | 4151         |                   |                | 4261      | 0.292157254 | 0.035928466 | 0.551525454  | 0.012767263   | 0.924802739  | 0.285490414  | 0.005898042  | 0.381593502  | 0.016144389  | 0.8615789   | XM 396525.3 | -       |
| chrUn      | 81010822  | 81017466  | XM 395979                         | 6645   | 6645         |                   |                | 4366      | 0.217306245 | 0.015653222 | 0.105282556  | 0.019416011   | 1.644661382  | 0.291480077  | 0.023846689  | 0.103846327  | 0.028564847  | 1.341930829 | XM 395979.3 | -       |
| chrUn      | 314445666 | 314446500 | AmelGUn WGA7483 2.505505.505505.m | 835    | 835          |                   |                | 835       | 0.379640749 | 0.033573141 | 0.98097534   | 0.055155875   | 1.611602345  | 0.379640749  | 0.033573141  | 0.98097534   | 0.055155875  | 1.611602345 | -           | -       |
| chrUn      | 55573410  | 55583435  | XM 395084                         | 10026  | 10026        |                   |                | 7533      | 0.219230002 | 0.015062344 | 0.219375692  | 0.014562342   | 1.220544847  | 0.268551706  | 0.0191477054 | 1.080317263  | 0.019210245  | 1.065518396 | XM 395084.3 | -       |
| chrUn      | 13916144  | 13919706  | AmelGUn WGA524 2.510163.510163.m  | 3563   | 3563         |                   |                | 2047      | 0.223407241 | 0.019651881 | 1.599200141  | 0.017405952   | 1.146434411  | 0.323888617  | 0.03388998   | 1.31180142   | 0.02848723   | 1.102681216 | -           | -       |
| chrUn      | 59947745  | 59952316  | XM 623413                         | 4572   | 4572         |                   |                | 2273      | 0.168635171 | 0.009844673 | 1.401767049  | 0.01268869    | 1.806721974  | 0.26572813   | 0.015957447  | 0.169988607  | 0.021276596  | 1.262651476 | -           | -       |
| chrUn      | 39276868  | 39278470  | AmelGUn WGA803 2.503504.503504.m  | 1603   | 1603         |                   |                | 1372      | 0.299438553 | 0.006242197 | 0.280620834  | 0.02309613    | 1.038297085  | 0.341836725  | 0.007315289  | 0.252154969  | 0.027065699  | 0.932973387 | -           | -       |
| chrUn      | 142796653 | 142797777 | AmelGUn WGA3018 2.507643.507643.m | 1125   | 1125         |                   |                | 1125      | 0.462222222 | 0.047153025 | 0.929043638  | 0.048042705   | 0.946572764  | 0.046222222  | 0.047153025  | 0.929043638  | 0.048042705  | 0.946572764 | -           | -       |
| chrUn      | 19087142  | 19088095  | XM 625326                         | 1254   | 1254         |                   |                | 136       | 0.310207337 | 0.008429226 | 0.799409704  | 0.0200275     | 1.392789547  | 0.3782988732 | 0.0178291413 | 0.291519426  | 0.0319201413 | 1.057290774 | XM 624416.2 | -       |
| chrUn      | 78031000  | 78031317  | XM 395346                         | 1218   | 1218         |                   |                | 1218      | 0.381773399 | 0.024650781 | 0.686838417  | 0.037797864   | 1.053152239  | 0.381773399  | 0.024650781  | 0.686838417  | 0.037797864  | 1.053152239 | XM 395346.3 | -       |
| chrUn      | 27231516  | 27236693  | XM 393487                         | 5178   | 5178         |                   |                | 4284      | 0.227500963 | 0.021247827 | 1.643842397  | 0.031317504   | 1.280857741  | 0.308857741  | 0.028398633  | 1.442719997  | 0.01761767   | 0.895020739 | XM 393487.3 | -       |
| chrUn      | 43066099  | 43070125  | XM 624871                         | 4027   | 4027         |                   |                | 3054      | 0.276973072 | 0.010928962 | 1.611260794  | 0.023845007   | 1.333659914  | 0.335952849  | 0.014478447  | 0.513832371  | 0.031260283  | 1.1094108   | XM 624871.1 | -       |
| chrUn      | 62202216  | 62205001  | XM 624925                         | 2786   | 2786         |                   |                | 1872      | 0.228284279 | 0.01005386  | 0.800172368  | 0.016157989   | 1.285991306  | 0.305555556  | 0.015061864  | 0.673977449  | 0.022054868  | 0.96895579  | XM 624925.2 | -       |
| chr6       | 6989852   | 7001012   | AmelG6 WGA199 2.500924.500924.m   | 2161   | 2161         |                   |                | 2075      | 0.375829218 | 0.061111111 | 1.739616343  | 0.032407407   | 1.922523818  | 0.390361446  | 0.063706564  | 1.676373252  | 0.033783784  | 0.88895815  | -           | -       |
| chr3       | 5466430   | 5468072   | XM 397328                         | 1643   | 1643         |                   |                | 1265      | 0.22841023  | 0.005481121 | 0.433900454  | 0.00997442    | 1.905968331  | 0.282213439  | 0.017154213  | 0.373250866  | 0.026232114  | 0.96885608  | XM 397328.3 | -       |
| chr10      | 21917332  | 21917332  | AmelG10 WGA315 2.502692.502692.m  | 451    | 451          |                   |                | 451       | 0.212871287 | 0.001791287 | 0.001791287  | 0.001791287   | 0.001791287  | 0.212871287  | 0.001791287  | 0.212871287  | 0.001791287  | 0.212871287 | -           | -       |
| chrUn      | 7719030   | 77520232  | AmelGUn WGA1481 2.510639.510639.m | 1203   | 1203         |                   |                | 980       | 0.38458002  | 0.014143095 | 0.706280681  | 0.02130616    | 1.080193983  | 0.330612245  | 0.01741803   | 0.6393868    | 0.025614754  | 0.940274809 | -           | -       |
| chr6       | 4364221   | 4406480   | XM 392425                         | 42260  | 40538        |                   |                | 36458     | 0.390571809 | 0.057037128 | 1.498587573  | 0.034982114   | 1.91460458   | 0.404081409  | 0.061963932  | 1.518017294  | 0.037662195  | 0.92663572  | XM 392425.3 | -       |
| chr1       | 13135948  | 13173481  | XM 001011594.1                    | 37534  | 37534        |                   |                | 33743     | 0.322507593 | 0.043375163 | 1.668115843  | 0.026136999   | 1.347420206  | 0.047856997  | 1.586019414  | 0.028815019  | 0.954958927  | -           | -           | -       |
| chr13      | 1160952   | 1162380   | XM 391953                         | 1429   | 1429         |                   |                | 1092      | 0.246326102 | 0.018207283 | 1.244019748  | 0.021008403   | 1.435407401  | 0.303113553  | 0.023941068  | 0.1076503087 | 0.200714982  | 1.092714982 | XM 391953.3 | -       |
| chrUn      | 312787264 | 312788793 | XM 623837                         | 1530   | 1530         |                   |                | 1247      | 0.205555518 | 0.01118378  | 0.680114473  | 0.020982712   | 1.281909596  | 0.301523657  | 0.013687601  | 0.602477983  | 0.024959472  | 1.098636322 | XM 623837.1 | -       |
| chrUn      | 117167780 | 117168905 | AmelGUn W                         |        |              |                   |                |           |             |             |              |               |              |              |              |              |              |             |             |         |

| chromosome | start     | end       | ID               | length | valid length | without Ns | non-repetitive | nr length | qcContent    | cpaContent  | cpqo/E       | qpcContent  | apco/E      | nrGContent  | nrCpGContent | nrCpGGO/E   | nrGpCpContent | nrGpCpCO/E  | RefSeqID    | version |
|------------|-----------|-----------|------------------|--------|--------------|------------|----------------|-----------|--------------|-------------|--------------|-------------|-------------|-------------|--------------|-------------|---------------|-------------|-------------|---------|
| chr1       | 16603437  | 16616779  | XM 392119        | 13343  | 13343        |            | 13032          |           | 0.434984636  | 0.075400989 | 0.1596733477 | 0.047743966 | 0.011052907 | 0.438075506 | 0.076781327  | 1.601571125 | 0.048679361   | 1.015396093 | XM 392119.3 |         |
| chr2       | 9901216   | 9903512   | XM 396134        | 2297   | 2297         |            | 1640           |           | 0.241619504  | 0.009146341 | 0.646422283  | 0.022648084 | 1.600664702 | 0.307317073 | 0.012247397  | 0.54086991  | 0.030006124   | 1.325131279 | XM 396134.3 |         |
| chr13      | 2557335   | 2561400   | Amel.G13 WGA395  | 4066   | 4066         |            | 3838           |           | 0.318002951  | 0.041082411 | 0.1691839684 | 0.024600246 | 0.103707655 | 0.331683168 | 0.043591752  | 1.645922435 | 0.02102845    | 0.985582297 |             |         |
| chr2       | 10745089  | 10826811  | XM 394369        | 81823  | 81532        |            | 78365          |           | 0.3355970652 | 0.054178371 | 1.71031433   | 0.03064688  | 0.968029392 | 0.363504115 | 0.035496852  | 1.69440548  | 0.031542323   | 0.854879437 | XM 394369.3 |         |
| chrUn      | 94173341  | 94175572  | XM 395696        | 2332   | 2332         |            | 1280           |           | 0.203853047  | 0.003137606 | 0.315777841  | 0.016136262 | 1.624000326 | 0.30078125  | 0.004724409  | 2.21906584  | 0.028346457   | 1.314395049 | XM 395696.3 |         |
| chr5       | 4919273   | 4921396   | XM 394543        | 2124   | 2124         |            | 1873           |           | 0.291902072  | 0.016015073 | 0.755982631  | 0.022695915 | 1.067269597 | 0.324773709 | 0.018201285  | 0.703840995 | 0.026595931   | 0.939657875 | XM 394543.3 |         |
| chr9       | 6689800   | 6692703   | XM 394817        | 67404  | 66505        |            | 63227          |           | 0.367987369  | 0.055142857 | 1.629171375  | 0.02939985  | 0.884559642 | 0.379473959 | 0.05757139   | 1.599590642 | 0.03137522    | 0.871743896 | XM 394817.3 |         |
| chr8       | 4809376   | 4812016   | XM 393479        | 2641   | 2641         |            | 2316           |           | 0.294585384  | 0.015909091 | 0.738947264  | 0.023863636 | 1.108420896 | 0.32642487  | 0.017748918  | 0.672392003 | 0.027272727   | 1.033187712 | XM 393479.3 |         |
| chrUn      | 132170512 | 132171766 | Amel.GUn WGA2740 | 1255   | 1255         |            | 1255           |           | 0.380876494  | 0.041467305 | 1.143578258  | 0.029505582 | 0.813699914 | 0.380876494 | 0.041467305  | 1.143578258 | 0.029505582   | 0.813699914 | -           |         |
| chrUn      | 100449194 | 100461959 | XM 624433        | 12766  | 12761        |            | 9186           |           | 0.0238773103 | 0.022341095 | 1.1672721939 | 0.015418502 | 1.081948944 | 0.297191378 | 0.030094112  | 1.363531547 | 0.020682863   | 0.937118095 | XM 624433.2 |         |
| chr2       | 2152931   | 2153497   | Amel.G2 WGA69    | 567    | 567          |            | 459            |           | 0.261022528  | 0.019434629 | 1.189872298  | 0.01590106  | 0.973531188 | 0.307189542 | 0.024122807  | 1.074465504 | 0.019736842   | 0.879107322 | -           |         |
| chr1       | 17551100  | 1755975   | XM 393428        | 4876   | 4876         |            | 4464           |           | 0.3463940484 | 0.046541103 | 1.557883915  | 0.029333333 | 0.981398237 | 0.36887957  | 0.04895576   | 1.447405907 | 0.032113182   | 1.949445159 | XM 393428.3 |         |
| chr6       | 3771989   | 3773662   | XM 392963        | 4374   | 4374         |            | 2437           |           | 0.181327572  | 0.012348502 | 1.474093471  | 0.012348502 | 1.474093471 | 0.269593763 | 0.020256304  | 1.115949268 | 0.021496486   | 1.874272693 | XM 392963.3 |         |
| chrUn      | 14676269  | 14678475  | XM 392837        | 2207   | 2207         |            | 1562           |           | 0.263706389  | 0.013599275 | 0.793711819  | 0.025838622 | 1.508052457 | 0.343149808 | 0.019267823  | 0.663399541 | 0.033397559   | 1.149892538 | XM 392837.3 |         |
| chr5       | 9686341   | 9690628   | Amel.G5 WGA168   | 4288   | 4288         |            | 4171           |           | 0.376399254  | 0.041520877 | 1.172361857  | 0.037788663 | 1.066981016 | 0.386238312 | 0.042726836  | 1.145719508 | 0.038862222   | 1.042733485 | -           |         |
| chrUn      | 94905868  | 94909483  | XM 395493        | 3616   | 3616         |            | 2346           |           | 0.221238938  | 0.018810512 | 1.544261157  | 0.019363762 | 1.589680603 | 0.296675192 | 0.027837259  | 1.273944341 | 0.026980728   | 1.234746054 | XM 395493.3 |         |
| chrUn      | 12904295  | 12909781  | XM 392724        | 5487   | 5487         |            | 4574           |           | 0.308911974  | 0.026613197 | 1.115593191  | 0.024425811 | 0.923090589 | 0.342369917 | 0.031359649  | 1.072281008 | 0.027850877   | 0.95230551  | XM 392724.3 |         |
| chrUn      | 3298325   | 3309948   | Amel.GUn WGA462  | 11624  | 10391        |            | 7455           |           | 0.1957466319 | 0.004428186 | 0.464601804  | 0.014536003 | 1.525105923 | 0.248826291 | 0.06065057   | 0.394690585 | 0.020083569   | 1.306864383 | -           |         |
| chrUn      | 32540208  | 32546007  | Amel.GUn WGA715  | 5800   | 5800         |            | 5589           |           | 0.211206897  | 0.005173306 | 0.464223614  | 0.013967926 | 1.253403757 | 0.297575926 | 0.007291082  | 0.329422983 | 0.021592821   | 0.975598833 | -           |         |
| chr10      | 3038382   | 3043180   | XM 393690        | 4799   | 4799         |            | 3646           |           | 0.268180871  | 0.016465194 | 0.920138255  | 0.021467474 | 1.351089083 | 0.332967636 | 0.021775083  | 1.794377685 | 0.019735359   | 1.164959639 | XM 393690.3 |         |
| chr1       | 10958926  | 10964581  | XM 623113        | 5656   | 5656         |            | 3093           |           | 0.209512023  | 0.008841733 | 0.805725705  | 0.018037135 | 1.643680439 | 0.322017459 | 0.014983713  | 0.578139576 | 0.031921824   | 1.231688661 | -           |         |
| chr1       | 20437545  | 20470801  | Amel.G1 WGA52    | 33257  | 33207        |            | 31456          |           | 0.446502244  | 0.076554736 | 1.546099159  | 0.046047282 | 0.92666853  | 0.447132503 | 0.07910234   | 1.58771882  | 0.047079421   | 0.94496446  | -           |         |
| chrUn      | 57866742  | 57869212  | Amel.GUn WGA1107 | 2471   | 2471         |            | 2357           |           | 0.342776204  | 0.047368421 | 1.616390849  | 0.026315789 | 0.897999416 | 0.359351152 | 0.049723757  | 1.543814385 | 0.02764309    | 0.857674658 | -           |         |
| chrUn      | 1300802   | 1304555   | XM 395457        | 3754   | 3754         |            | 3257           |           | 0.332711774  | 0.030375699 | 1.110984142  | 0.03171506  | 1.140217777 | 0.372121584 | 0.035098522  | 1.025662702 | 0.035046044   | 1.034659743 | XM 395457.2 |         |
| chr16      | 2614380   | 2614774   | Amel.G16 WGA452  | 395    | 395          |            | 327            |           | 0.275949367  | 0.007614213 | 0.405740305  | 0.015228426 | 1.811480611 | 0.321100917 | 0.009230769  | 0.363683465 | 0.018461538   | 0.972366929 | -           |         |
| chr7       | 24801663  | 24805471  | Amel.G7 WGA1234  | 2471   | 2471         |            | 2141           |           | 0.15594671   | 0.005147255 | 1.40807541   | 0.00527302  | 1.95422355  | 0.31607433  | 0.095080612  | 1.41607431  | 0.058080612   | 1.74174051  | -           |         |
| chrUn      | 305913951 | 305915045 | Amel.GUn WGA7260 | 1095   | 1095         |            | 1095           |           | 0.088226697  | 0.008226697 | 0.779799087  | 0.053013653 | 0.948097767 | 0.008226697 | 0.008226697  | 1.174118605 | 0.03016453    | 0.948097767 | -           |         |
| chrUn      | 159973209 | 159983428 | XM 624489        | 10220  | 10220        |            | 10220          |           | 0.224559687  | 0.021919553 | 1.739673131  | 0.015852823 | 1.258156592 | 0.300883584 | 0.032147316  | 1.42208481  | 0.023876404   | 1.056208621 | XM 624489.2 |         |
| chrUn      | 102063487 | 102064032 | Amel.GUn WGA1966 | 546    | 546          |            | 355            |           | 0.214285714  | 0.00550447  | 0.515715118  | 0.01284037  | 1.20335275  | 0.284507042 | 0.002840909  | 0.19886364  | 1.058352609   | -           |             |         |
| chrUn      | 236497009 | 236498019 | Amel.GUn WGA5453 | 1011   | 1011         |            | 1011           |           | 0.40751731   | 0.03960396  | 0.979032085  | 0.057425743 | 1.415996523 | 0.40751731  | 0.03960396   | 0.979032085 | 0.057425743   | 1.415996523 | -           |         |
| chr14      | 1939224   | 1942529   | XM 394011        | 3306   | 3306         |            | 3169           |           | 0.302177858  | 0.027836611 | 1.223021072  | 0.02405749  | 1.063583541 | 0.312085831 | 0.02906793   | 1.198648527 | 0.025276461   | 1.042303067 | XM 394011.3 |         |
| chr15      | 2999470   | 3001010   | XM 395490        | 1541   | 1541         |            | 1263           |           | 0.273848151  | 0.005844156 | 0.318149649  | 0.020797221 | 1.131198752 | 0.32383162  | 0.007159905  | 0.278907393 | 0.025457438   | 0.991670732 | XM 395490.2 |         |
| chrUn      | 156293534 | 156296709 | Amel.GUn WGA3374 | 3176   | 3176         |            | 3176           |           | 0.480478589  | 0.064566929 | 1.119277282  | 0.052598425 | 0.911801493 | 0.480478589 | 0.064566929  | 1.119277282 | 0.052598425   | 0.911801493 | -           |         |
| chr15      | 3056481   | 3056863   | Amel.G2 WGA252   | 2556   | 2556         |            | 2195           |           | 0.320529801  | 0.013673169 | 1.06249082   | 0.013673169 | 1.06249082  | 0.320529801 | 0.013673169  | 1.06249082  | 0.320529801   | 1.06249082  | -           |         |
| chrUn      | 31024415  | 31026152  | Amel.GUn WGA697  | 1738   | 1738         |            | 1738           |           | 0.308461264  | 0.026785714 | 1.132773851  | 0.032875143 | 1.388922591 | 0.349773942 | 0.030978934  | 1.018446617 | 0.038000826   | 1.249259417 | XM 392071.3 |         |
| chrUn      | 24719091  | 24721820  | XM 392148        | 2730   | 2730         |            | 2463           |           | 0.458573072  | 0.069084629 | 1.32726972   | 0.080023028 | 1.058573709 | 0.458573072 | 0.069084629  | 1.347226972 | 0.080023028   | 1.058573709 | -           |         |
| chr5       | 6907738   | 6909888   | Amel.G5 WGA162   | 2151   | 2151         |            | 1768           |           | 0.302930403  | 0.023085739 | 1.021498427  | 0.03114694  | 1.182121164 | 0.330085262 | 0.025223759  | 0.938832971 | 0.03458096    | 1.082109718 | XM 392148.3 |         |
| chr13      | 4708844   | 4760441   | XM 624751        | 5159   | 5089         |            | 47978          |           | 0.29567643   | 0.011627907 | 0.356481873  | 0.02581395  | 1.18062012  | 0.330882353 | 0.013045944  | 0.479734202 | 0.028927964   | 1.063758449 | -           |         |
| chr15      | 4957023   | 4958033   | Amel.G15 WGA436  | 1011   | 1011         |            | 1011           |           | 0.4514045    | 0.07635628  | 1.501575947  | 0.0456934   | 0.87637011  | 0.457042814 | 0.008016001  | 1.540854814 | 0.046981967   | 0.899731306 | XM 624751.2 |         |
| chr13      | 3551527   | 3551971   | XM 391971        | 1940   | 1940         |            | 1709           |           | 0.524233432  | 0.089108911 | 1.30114413   | 0.072277228 | 1.053532461 | 0.524233432 | 0.089108911  | 1.30114413  | 0.072277228   | 1.053532461 | -           |         |
| chrUn      | 70891284  | 70896817  | XM 624192        | 5534   | 5534         |            | 4563           |           | 0.245360825  | 0.017291680 | 1.27291680   | 0.017291680 | 1.27291680  | 0.245360825 | 0.017291680  | 1.27291680  | 0.017291680   | 1.27291680  | XM 391971.3 |         |
| chrUn      | 29704147  | 29707003  | XM 395543        | 2857   | 2857         |            | 2218           |           | 0.281893748  | 0.017169709 | 0.889361184  | 0.020061449 | 1.039148333 | 0.376325328 | 0.020654801  | 0.794241121 | 0.024170512   | 0.929431099 | XM 624192.2 |         |
| chrUn      | 3133552   | 3134805   | XM 394090        | 1254   | 1254         |            | 1098           |           | 0.310465523  | 0.011204482 | 0.481636409  | 0.026260504 | 1.128835334 | 0.345356177 | 0.014046217  | 1.018925917 | 0.029048849   | 1.018925917 | XM 395543.3 |         |
| chr15      | 69096051  | 69100281  | XM 624904        | 4231   | 4231         |            | 3325           |           | 0.289473684  | 0.009577015 | 0.487820989  | 0.0207502   | 1.056954576 | 0.317850638 | 0.010958904  | 0.456092883 | 0.023744292   | 0.988201246 | XM 394090.1 |         |
| chrUn      | 123381047 | 123382089 | Amel.GUn WGA2515 | 1043   | 1041         |            | 1041           |           | 0.242732215  | 0.008747045 | 0.600352767  | 0.019621749 | 1.346737289 | 0.405473684 | 0.011188388  | 0.51996345  | 0.025098276   | 1.166404496 | XM 624904.2 |         |
| chr2       | 207400    | 2102808   | Amel.GUn WGA2515 | 1043   | 1041         |            | 1041           |           | 0.412103748  | 0.035645472 | 0.890915651  | 0.062620424 | 1.56512209  | 0.412103748 | 0.035645472  | 0.890915651 | 0.062620424   | 1.56512209  | -           |         |
| chrUn      | 107177309 | 107181956 | XM 624661        | 4648   | 4648         |            | 3844           |           | 0.320398716  | 0.038319079 | 1.326763056  | 0.029202279 | 1.145206006 | 0.33911368  | 0.036279429  | 1.271397096 | 0.031648012   | 1.09091084  | -           |         |
| chrUn      | 17571478  | 17571584  | XM 001011584.1   | 3846   | 3846         |            | 3024           |           | 0.285929432  | 0.029696578 | 1.452950735  | 0.022810413 | 1.116034638 | 0.332206035 | 0.036012526  | 1.305303765 | 0.027661795   |             |             |         |

| chromosome | start     | end       | ID                                | lenqth | valid | lenqth | without | Ns | qcContent   | cpaContent  | cpaQ/E      | qpcContent  | nrCContent  | nrCpGContent | nrCpGQ/E    | nrCpGQContent | nrCpGQContent | RefSeqID    | version     |
|------------|-----------|-----------|-----------------------------------|--------|-------|--------|---------|----|-------------|-------------|-------------|-------------|-------------|--------------|-------------|---------------|---------------|-------------|-------------|
| chr8       | 5544061   | 5554752   | XM 392495                         | 10692  | 10692 |        |         |    | 0.010886644 | 0.028715742 | 0.189025591 | 0.025816107 | 0.068961118 | 0.329105004  | 0.136615788 | 0.027839419   | 1.028544123   | XM 392495.3 |             |
| chr11      | 700255    | 702766    | XM 391873                         | 2510   | 2510  |        |         |    | 0.268924303 | 0.013949781 | 0.800803801 | 0.02471104  | 0.141856673 | 0.295679568  | 0.015349687 | 0.731377045   | 0.027990971   | XM 391873.3 |             |
| chr5       | 9312176   | 9314906   | AmelG5 WGA167 2.514778.514778.m   | 2731   | 2731  |        |         |    | 0.186744782 | 0.004395604 | 0.007956251 | 0.011355311 | 0.131220315 | 0.266987372  | 0.342953385 | 0.017565112   | 0.934564817   | -           |             |
| chrUn      | 26246672  | 26248019  | XM 395077                         | 1348   | 1348  |        |         |    | 0.186201178 | 0.129151581 | 0.008906066 | 0.008906066 | 0.138092145 | 0.293853073  | 0.032201931 | 0.293853073   | 0.019659971   | XM 395077.3 |             |
| chr4       | 6736650   | 6751893   | AmelG4 WGA139 2.504583.504583.m   | 15244  | 14612 |        |         |    | 0.401998358 | 0.054973643 | 0.364610592 | 0.042103101 | 0.045125173 | 0.421786035  | 0.058885384 | 1.328116354   | 0.045215563   | 0.019806329 |             |
| chrUn      | 43558720  | 43559593  | AmelGUn WGA870 2.511855.511855.m  | 874    | 824   |        |         |    | 0.189320388 | 0.006082725 | 0.679280181 | 0.00729927  | 0.081513681 | 0.275053305  | 0.010775862 | 0.569776297   | 0.012931034   | 0.683731557 |             |
| chr13      | 316675    | 318156    | XM 623928                         | 1482   | 1482  |        |         |    | 0.276653171 | 0.025658339 | 1.366456334 | 0.02498312  | 1.330496957 | 0.295970696  | 0.027900147 | 1.298956799   | 0.027165932   | 1.264773725 | XM 623928.2 |
| chrUn      | 69296825  | 69299626  | XM 623658                         | 2802   | 2802  |        |         |    | 0.292648108 | 0.028204213 | 1.319058992 | 0.024277044 | 1.13539255  | 0.344478663  | 0.034437086 | 1.16199616    | 0.030022075   | 0.013022293 | XM 623658.2 |
| chr1       | 22424906  | 22428612  | XM 623717                         | 3707   | 3707  |        |         |    | 0.392230914 | 0.063140853 | 1.641872334 | 0.040205073 | 1.045465717 | 0.404844291  | 0.067321583 | 1.643656414   | 0.043051141   | 1.051093587 | XM 623717.2 |
| chrUn      | 31318923  | 31327685  | AmelGUn WGA700 2.509343.509343.m  | 8763   | 8763  |        |         |    | 0.225379436 | 0.014722666 | 1.176588878 | 0.014836795 | 1.085709722 | 0.295523906  | 0.021294719 | 0.990104782   | 0.021294719   | 0.990104782 |             |
| chr1       | 972671    | 976295    | AmelG1 WGA1 2.503845.503845.m     | 3625   | 3625  |        |         |    | 0.330487259 | 0.042770419 | 1.567394494 | 0.028766004 | 0.980885577 | 0.343504795  | 0.045123726 | 1.530205706   | 0.028238719   | 0.957612603 |             |
| chr3       | 7760280   | 7764313   | AmelG3 WGA114 2.503073.503073.m   | 4054   | 4054  |        |         |    | 0.258016774 | 0.00639227  | 0.37176189  | 0.020972119 | 1.263990425 | 0.268280124  | 0.006448285 | 0.359480103   | 0.021924168   | 1.222232351 |             |
| chrUn      | 3726975   | 37307304  | XM 395523                         | 10330  | 10330 |        |         |    | 0.22482951  | 0.021105623 | 1.061592494 | 0.02848291  | 1.197493548 | 0.332842054  | 0.026377419 | 0.961240257   | 0.028965857   | 0.9525523.3 |             |
| chrUn      | 12985514  | 12986365  | AmelGUn WGA516 2.504485.504485.m  | 852    | 852   |        |         |    | 0.394366197 | 0.051703878 | 1.331490411 | 0.042301373 | 1.089401245 | 0.394366197  | 0.051703878 | 1.331490411   | 0.042301373   | 1.089401245 |             |
| chr4       | 7790730   | 7858133   | XM 623613                         | 67156  | 67156 |        |         |    | 0.367026029 | 0.05420377  | 1.610839302 | 0.031405426 | 0.933313211 | 0.377423463  | 0.056795643 | 1.595860931   | 0.032868432   | 0.923547013 |             |
| chrUn      | 86604261  | 86606645  | XM 623797                         | 2385   | 2385  |        |         |    | 0.244863732 | 0.005033557 | 0.33694622  | 0.015520134 | 1.038917511 | 0.327020202  | 0.007619048 | 0.287243316   | 0.022857143   | 0.861729947 | XM 623797.2 |
| chrUn      | 63952428  | 63927034  | XM 623320                         | 19607  | 19607 |        |         |    | 0.266996481 | 0.024737325 | 1.398698124 | 0.02351321  | 1.329484196 | 0.321921922  | 0.031821531 | 1.241141057   | 0.030280699   | 1.181043701 | XM 623320.2 |
| chr11      | 1063473   | 1065815   | XM 396873                         | 2343   | 2343  |        |         |    | 0.273580879 | 0.010247652 | 0.558427737 | 0.02177626  | 1.186658942 | 0.296682464  | 0.011406844 | 0.528822495   | 0.023764259   | 1.101713531 | XM 396873.3 |
| chrUn      | 14400475  | 14403127  | XM 396208                         | 2653   | 2653  |        |         |    | 0.232189974 | 0.007164004 | 0.536652411 | 0.019607843 | 1.468732915 | 0.285286783  | 0.009514271 | 0.475556827   | 0.025538307   | 1.276494461 | XM 396208.3 |
| chr14      | 425893    | 4261687   | XM 624098                         | 4795   | 4795  |        |         |    | 0.247966632 | 0.011889862 | 0.97486169  | 0.016270338 | 1.087705471 | 0.300288487  | 0.015019763 | 0.685746525   | 0.020298955   | 0.926359341 | XM 624098.2 |
| chr9       | 5737973   | 5821442   | XM 396411                         | 8340   | 8340  |        |         |    | 0.333409254 | 0.045721547 | 1.645228476 | 0.024646959 | 0.886887715 | 0.348605068  | 0.048505741 | 1.596586014   | 0.026104675   | 0.819245894 | XM 396411.3 |
| chrUn      | 24007349  | 24008360  | AmelGUn WGA618 2.506999.506999.m  | 922    | 922   |        |         |    | 0.264642082 | 0.009771987 | 0.559469947 | 0.013029316 | 0.475959929 | 0.305882533  | 0.011826544 | 0.506527314   | 0.014454665   | 0.65908894  | -           |
| chr15      | 5919397   | 5922298   | XM 624210                         | 2902   | 2902  |        |         |    | 0.268780152 | 0.013098931 | 0.735505208 | 0.019933016 | 1.122613212 | 0.287936267  | 0.014443177 | 0.706979965   | 0.02204485    | 1.079102157 | XM 624210.2 |
| chr14      | 6693483   | 6700234   | XM 396739                         | 7352   | 7352  |        |         |    | 0.251768226 | 0.020133315 | 1.276698803 | 0.020677459 | 1.307096068 | 0.320450281  | 0.027118644 | 1.058024126   | 0.02848588    | 1.102108464 | XM 396739.3 |
| chrUn      | 87069089  | 87074598  | AmelGUn WGA1660 2.504964.504964.m | 5510   | 5510  |        |         |    | 0.232667577 | 0.01742603  | 1.287814325 | 0.011254311 | 0.831713418 | 0.28487028   | 0.024786987 | 1.222208208   | 0.016008262   | 0.789342801 |             |
| chr16      | 2410120   | 2410120   | XM 396633                         | 800    | 800   |        |         |    | 0.323636364 | 0.003636364 | 0.003636364 | 0.003636364 | 0.323636364 | 0.323636364  | 0.323636364 | 0.323636364   | 0.323636364   | 0.323636364 | XM 396630.2 |
| chr3       | 328228    | 330488    | XM 396075                         | 2255   | 2255  |        |         |    | 0.230158111 | 0.003512068 | 0.271521004 | 0.017302573 | 0.301911668 | 0.046858599  | 0.02584943  | 0.206858599   | 0.02584943    | 0.206858599 | XM 396075.2 |
| chr10      | 6850786   | 6859391   | AmelG10 WGA325 2.506034.506034.m  | 8606   | 8606  |        |         |    | 0.270160353 | 0.028239396 | 1.547506464 | 0.018477629 | 1.01266018  | 0.291422007  | 0.031090072 | 1.464326007   | 0.020214944   | 0.952113206 |             |
| chrUn      | 12069027  | 12081290  | XM 392867                         | 12264  | 11898 |        |         |    | 0.236594386 | 0.014629225 | 1.051509639 | 0.016226669 | 1.166329657 | 0.308461975  | 0.020598089 | 0.686660158   | 0.022707532   | 0.95761933  | XM 392867.3 |
| chrUn      | 127804020 | 127806504 | XM 001013359.1                    | 2485   | 2485  |        |         |    | 0.319517103 | 0.049114332 | 1.924527416 | 0.024959742 | 0.978038523 | 0.33895374   | 0.052882531 | 1.841351035   | 0.026874729   | 0.952768559 |             |
| chr1       | 2451754   | 2492055   | XM 394237                         | 40752  | 40752 |        |         |    | 0.370424058 | 0.051769042 | 1.51150174  | 0.031154791 | 0.906827056 | 0.37981341   | 0.054458329 | 1.512996167   | 0.035020279   | 0.905443987 | XM 394237.3 |
| chrUn      | 83621387  | 83623179  | XM 392902                         | 1793   | 1793  |        |         |    | 0.214723926 | 0.006138393 | 0.539918089 | 0.016741071 | 1.472503878 | 0.292372881  | 0.009377664 | 0.445100201   | 0.025554408   | 1.21399064  | XM 392902.3 |
| chrUn      | 45240070  | 45277606  | XM 395227                         | 37537  | 37537 |        |         |    | 0.297333298 | 0.035219523 | 1.593881197 | 0.01925618  | 0.992257356 | 0.314891009  | 0.038361751 | 1.547556869   | 0.025300474   | 0.960145802 | XM 395227.2 |
| chrUn      | 26345598  | 26372785  | XM 392043                         | 1182   | 1182  |        |         |    | 0.19781136  | 0.008598026 | 0.39409805  | 0.063079657 | 1.063079657 | 0.248730964  | 0.019548772 | 0.248730964   | 0.019548772   | 0.248730964 |             |
| chrUn      | 274301307 | 274302372 | XM 623804                         | 1066   | 1066  |        |         |    | 0.203564728 | 0.00657277  | 0.655636111 | 0.011267606 | 1.123947618 | 0.305647841  | 0.011764706 | 0.515672045   | 0.020168067   | 0.884009221 | XM 623804.2 |
| chr12      | 733881    | 798586    | XM 396660                         | 64706  | 64706 |        |         |    | 0.349890273 | 0.047956108 | 1.566879816 | 0.027710378 | 0.903597288 | 0.362514487  | 0.020580057 | 1.533444175   | 0.020968553   | 0.85636155  |             |
| chrUn      | 47560508  | 47569753  | XM 623108                         | 9246   | 9246  |        |         |    | 0.247025741 | 0.012655489 | 0.839470117 | 0.024878313 | 1.6502404   | 0.311413123  | 0.017165493 | 0.717187749   | 0.033157277   | 1.38533702  | XM 623108.2 |
| chr3       | 1968689   | 2052292   | AmelG3 WGA101 2.504573.504573.m   | 83064  | 81168 |        |         |    | 0.354289868 | 0.056268096 | 1.793235414 | 0.031651574 | 1.098719461 | 0.379158566  | 0.061395676 | 1.708501193   | 0.034486024   | 0.959667153 | -           |
| chr13      | 121634673 | 121635931 | AmelGUn WGA2470 2.511649.511649.m | 1259   | 1259  |        |         |    | 0.351866561 | 0.027027027 | 0.847773824 | 0.042952578 | 1.393634897 | 0.351866561  | 0.027027027 | 0.847743824   | 0.042952578   | 1.393634897 |             |
| chr8       | 1579896   | 1590726   | XM 395426                         | 10831  | 10831 |        |         |    | 0.405777906 | 0.051523546 | 1.255004242 | 0.034072022 | 0.82992216  | 0.468461181  | 0.051902149 | 1.247684893   | 0.034322389   | 0.808181945 | XM 395426.3 |
| chrUn      | 5249673   | 5249673   | XM 623682                         | 40584  | 40584 |        |         |    | 0.422521015 | 0.021068091 | 1.521364064 | 0.021068091 | 1.521364064 | 0.422521015  | 0.021068091 | 1.521364064   | 0.021068091   | 1.521364064 | XM 623682.2 |
| chrUn      | 99886323  | 99897442  | AmelGUn WGA1920 2.505468.505468.m | 11120  | 11120 |        |         |    | 0.245143885 | 0.024462632 | 0.628600469 | 0.018976527 | 1.263362864 | 0.3014149    | 0.032137699 | 1.014488592   | 0.024795378   | 0.997114045 |             |
| chr9       | 977       | 4558      | XM 396084                         | 3582   | 3582  |        |         |    | 0.256560581 | 0.015917342 | 0.967369344 | 0.020106116 | 1.221940224 | 0.285617597  | 0.018021081 | 0.885067252   | 0.022101326   | 1.085459838 | XM 396084.3 |
| chr5       | 10105280  | 10108286  | XM 392377                         | 3007   | 3007  |        |         |    | 0.284669105 | 0.021956088 | 1.08376881  | 0.022621424 | 1.116610289 | 0.30749543   | 0.024193548 | 1.023522942   | 0.024926686   | 1.054538789 | XM 392377.3 |
| chr5       | 5962975   | 5965003   | XM 625065                         | 2029   | 1562  |        |         |    | 0.247752923 | 0.008974359 | 0.594322672 | 0.019871795 | 1.316000203 | 0.293227092  | 0.011217949 | 0.53090594    | 0.024839744   | 1.175577438 | XM 625065.2 |
| chr10      | 1661218   | 1663318   | AmelG15 WGA427 2.512740.512740.m  | 2101   | 2101  |        |         |    | 0.322227511 | 0.034285714 | 1.320974376 | 0.032380952 | 1.247586911 | 0.329423265  | 0.035225409 | 1.298429454   | 0.033268102   | 1.226294484 |             |
| chr15      | 282276    | 282394    | XM 393660                         | 1016   | 1016  |        |         |    | 0.202755906 | 0.008866995 | 0.884027546 | 0.010837438 | 1.080557407 | 0.26227209   | 0.012693935 | 0.761889386   | 0.01551481    | 0.931198139 | XM 393660.3 |
| chrUn      | 157861625 | 157862425 | AmelGUn WGA3414 2.505974.505974.m | 801    | 801   |        |         |    | 0.27340824  | 0.00875     | 0.468302365 | 0.02625     | 1.440390795 | 0.289156627  |             |               |               |             |             |

| chromosome | start     | end       | ID                                | length | valid length | without Ns | nr length | qpcContent  | cpaContent  | cpaQ/E      | qpcContent   | qpcQ/E      | nrGContent   | nrCpGContent | nrCpGQ/E    | nrGpCContent | nrGpCQ/E     | RefSeqID | version     |
|------------|-----------|-----------|-----------------------------------|--------|--------------|------------|-----------|-------------|-------------|-------------|--------------|-------------|--------------|--------------|-------------|--------------|--------------|----------|-------------|
| chrUn      | 31021932  | 31022934  | AmelGUn WGA697 2.503498.503498.m  | 1003   | 1003         |            | 1003      | 0.567298106 | 0.079840319 | 0.994922332 | 0.120758483  | 1.504820027 | 0.567298106  | 0.079840319  | 0.994922332 | 0.120758483  | 1.504820027  | -        | -           |
| chr2       | 3712752   | 3715973   | XM 623130                         | 3222   | 3222         |            | 2754      | 0.274363749 | 0.017075442 | 0.914850112 | 0.0204905031 | 1.097820134 | 0.314451707  | 0.020051039  | 0.817093414 | 0.024061247  | 0.980512097  | XM       | 322130.2    |
| chrUn      | 1352393   | 1438331   | XM 392296                         | 89299  | 83205        |            | 78535     | 0.356108407 | 0.052633477 | 1.660757321 | 0.031118537  | 0.981891004 | 0.37060813   | 0.055695426  | 1.6227252   | 0.03297251   | 0.960693015  | XM       | 392296.3    |
| chr9       | 2920821   | 2923187   | AmelG2 WGA286 2.505283.505283.m   | 2377   | 2377         |            | 2060      | 0.374842238 | 0.057230903 | 1.660851584 | 0.029461279  | 0.859024396 | 0.384955752  | 0.031028368  | 1.653768458 | 0.03270004   | 0.83220004   | XM       | 292082.1    |
| chrUn      | 67974410  | 67982022  | XM 624407                         | 7613   | 7613         |            | 5377      | 0.246026534 | 0.008801892 | 0.583281262 | 0.022070415  | 1.46242854  | 0.32229868   | 0.012149583  | 0.468689857 | 0.031028037  | 1.19321248   | XM       | 624407.2    |
| chrUn      | 216734403 | 216735770 | AmelGUn WGA4937 2.507154.507154.m | 1748   | 1748         |            | 1748      | 0.358695652 | 0.022896394 | 0.715850025 | 0.046365197  | 0.98695652  | 0.022896394  | 0.358695652  | 0.046365197 | 1.4495963    | -            | -        | -           |
| chr9       | 2542782   | 2551454   | XM 392530                         | 8673   | 8673         |            | 8229      | 0.427994927 | 0.07795203  | 1.704353612 | 0.045087638  | 0.985802163 | 0.44379633   | 0.081923311  | 1.666459411 | 0.047595861  | 0.968180728  | XM       | 392530.3    |
| chr3       | 5727915   | 5778647   | XM 396307                         | 48933  | 47773        |            | 43663     | 0.353002742 | 0.049047519 | 1.574559239 | 0.029725769  | 0.954278326 | 0.373955065  | 0.053149742  | 1.520512898 | 0.032330555  | 0.925044332  | XM       | 396307.3    |
| chr1       | 10564828  | 10568699  | XM 396477                         | 3872   | 3872         |            | 3746      | 0.469524793 | 0.068974425 | 1.261768332 | 0.055024541  | 1.006579231 | 0.482915109  | 0.070550508  | 1.220493829 | 0.056921432  | 0.984716612  | -        | -           |
| chrUn      | 47309231  | 47311583  | AmelGUn WGA932 2.504509.504509.m  | 2353   | 2353         |            | 2120      | 0.318317042 | 0.039540816 | 1.573529696 | 0.027636054  | 1.099778802 | 0.349528302  | 0.043992431  | 1.451536433 | 0.030747398  | 1.014514711  | -        | -           |
| chr13      | 565235    | 569671    | XM 393336                         | 4437   | 4437         |            | 3848      | 0.299526707 | 0.021190261 | 0.957457796 | 0.029080252  | 1.313958039 | 0.336278586  | 0.069016555  | 0.033620016 | 1.20541006   | -            | -        | XM 393336.3 |
| chr1       | 6206646   | 6215816   | AmelG1 WGA16 2.512360.512360.m    | 9171   | 9171         |            | 8905      | 0.333660451 | 0.037173734 | 1.355867973 | 0.026717557  | 0.960079923 | 0.341718136  | 0.038902631  | 1.332672977 | 0.027546661  | 0.943655721  | -        | -           |
| chr14      | 2326430   | 2327615   | XM 624955                         | 1186   | 1186         |            | 897       | 0.235245519 | 0.006751055 | 0.496705029 | 0.017721519  | 1.303850702 | 0.28051282   | 0.008978676  | 0.467593737 | 0.023569024  | 1.132733559  | XM       | 624955.2    |
| chr1       | 4760882   | 4762022   | XM 394229                         | 1141   | 1141         |            | 1007      | 0.25942156  | 0.007894737 | 0.477029693 | 0.021052632  | 1.272247183 | 0.285998014  | 0.008973081  | 0.448344103 | 0.023928215  | 1.195584275  | XM       | 394229.2    |
| chrUn      | 29458442  | 29459667  | XM 625156                         | 1226   | 1226         |            | 823       | 0.216965742 | 0.008979592 | 0.775690171 | 0.014693878  | 1.269311189 | 0.281895504  | 0.013447433  | 0.690025469 | 0.020782396  | 1.066402997  | XM       | 625156.2    |
| chrUn      | 300051433 | 300053453 | XM 623864                         | 2021   | 2021         |            | 1010      | 0.202869866 | 0.016831683 | 1.636234216 | 0.021782178  | 1.217479574 | 0.317821782  | 0.029850746  | 1.19181003  | 0.039800995  | 1.58908004   | XM       | 623864.2    |
| chrUn      | 76741415  | 76743241  | XM 392954                         | 1827   | 1827         |            | 1716      | 0.290640394 | 0.023001095 | 1.095079489 | 0.025191676  | 1.199372774 | 0.307109557  | 0.02453271   | 1.045053851 | 0.026869159  | 1.14582789   | XM       | 392954.1    |
| chr9       | 1296167   | 1306171   | AmelG9 WGA285 2.513799.513799.m   | 10005  | 10005        |            | 9257      | 0.396001999 | 0.048486068 | 1.252195847 | 0.032387045  | 0.836518463 | 0.400020498  | 0.04925272   | 1.2476217   | 0.033022254  | 0.839646224  | -        | -           |
| chrUn      | 96750648  | 96755852  | XM 624928                         | 5205   | 5205         |            | 5039      | 0.374831892 | 0.026325903 | 0.754896863 | 0.040161414  | 1.15163098  | 0.385790832  | 0.027214938  | 0.736786826 | 0.041313903  | 1.118625254  | XM       | 624928.2    |
| chr4       | 8283504   | 8284532   | XM 623203                         | 1029   | 1029         |            | 876       | 0.258503491 | 0.010700389 | 0.606707397 | 0.011673152  | 0.72258615  | 0.303874092  | 0.01216545   | 0.549222204 | 0.01459854   | 0.61506644   | XM       | 623203.1    |
| chr2       | 3503785   | 3513283   | AmelG2 WGA71 2.506402.506402.m    | 9499   | 9499         |            | 9249      | 0.436361722 | 0.077911139 | 1.637950134 | 0.047694251  | 1.026091096 | 0.444588604  | 0.080077914  | 1.622461154 | 0.049020669  | 0.993209328  | -        | -           |
| chr1       | 13460550  | 13461796  | XM 392127                         | 1247   | 1247         |            | 924       | 0.238171612 | 0.012841091 | 0.612502584 | 0.017658553  | 1.257028553 | 0.301948052  | 0.016357688  | 0.723466718 | 0.03291276   | 1.06108452   | XM       | 392127.3    |
| chr2       | 820645    | 822475    | AmelG2 WGA67 2.504397.504397.m    | 1831   | 1831         |            | 1557      | 0.410704533 | 0.065027322 | 1.543365297 | 0.044808743  | 1.363495415 | 0.459216442  | 0.076675258  | 1.454732633 | 0.052835052  | 1.002420806  | -        | -           |
| chrUn      | 62197699  | 62198556  | AmelGUn WGA1168 2.511136.511136.m | 858    | 858          |            | 629       | 0.257575758 | 0.004667445 | 0.286333722 | 0.022170362  | 1.06085181  | 0.30620851   | 0.006410256  | 0.33227345  | 0.030448718  | 1.127973897  | -        | -           |
| chrUn      | 278160595 | 278162584 | XM 395566                         | 1990   | 1990         |            | 1124      | 0.181909548 | 0.005027652 | 0.629963772 | 0.016088487  | 1.201588407 | 0.264234875  | 0.00986861   | 0.538021199 | 0.025112108  | 1.056459358  | XM       | 395566.3    |
| chr6       | 51640816  | 51640918  | XM 392320                         | 1027   | 1027         |            | 1010      | 0.281818182 | 0.023030444 | 1.095222046 | 0.028958604  | 1.131487677 | 0.325644436  | 0.033362793  | 1.010875525 | 0.03402563   | 0.95035859   | XM       | 392320.3    |
| chr6       | 12857038  | 12858171  | AmelG6 WGA209 2.505937.505937.m   | 1134   | 1134         |            | 1134      | 0.425925926 | 0.065313323 | 1.40850637  | 0.034248014  | 0.954076777 | 0.425925926  | 0.031313227  | 1.440850637 | 0.034248014  | 0.954076773  | -        | -           |
| chr13      | 1053735   | 1056956   | XM 397319                         | 3222   | 3222         |            | 2624      | 0.242396027 | 0.00962434  | 0.658474763 | 0.022974232  | 1.571842982 | 0.283917683  | 0.011476664  | 0.573339919 | 0.028309105  | 1.414238467  | XM       | 397319.3    |
| chrUn      | 75538175  | 75539050  | AmelGUn WGA1433 2.504460.504460.m | 876    | 876          |            | 678       | 0.267123288 | 0.008       | 0.484722306 | 0.033142857  | 0.302815266 | 0.329598702  | 0.010385757  | 0.423241682 | 0.034206706  | 1.0753429825 | -        | -           |
| chr7       | 3358501   | 3379993   | AmelG7 WGA224 2.502600.502600.m   | 21493  | 21493        |            | 19494     | 0.328218999 | 0.047059372 | 1.747606043 | 0.030222471  | 1.122347587 | 0.353339489  | 0.051765794  | 1.659298534 | 0.033259651  | 1.066130427  | -        | -           |
| chr7       | 402328    | 408982    | XM 392431                         | 6655   | 6249         |            | 5946      | 0.340956676 | 0.046721444 | 1.60916399  | 0.03416143   | 1.09192061  | 0.353166044  | 0.048829769  | 1.584903873 | 0.03283381   | 1.065711225  | XM       | 392431.1    |
| chr5       | 6906096   | 6904307   | XM 624238                         | 3612   | 3612         |            | 2883      | 0.260520487 | 0.010523401 | 0.636592992 | 0.022431459  | 1.356948219 | 0.311827957  | 0.031235806  | 0.557813132 | 0.028213166  | 1.189027229  | -        | -           |
| chr11      | 2988079   | 2993466   | XM 623049                         | 5388   | 5388         |            | 4542      | 0.321640683 | 0.028030444 | 1.095222046 | 0.028958604  | 1.131487677 | 0.364817261  | 0.033362793  | 1.010875525 | 0.03402563   | 0.95035859   | XM       | 623049.3    |
| chr12      | 212746517 | 287541    | XM 397230                         | 4307   | 4307         |            | 4107      | 0.266122914 | 0.018928571 | 0.929587739 | 0.022145129  | 1.313866092 | 0.34371953   | 0.016328027  | 0.90568203  | 0.022595914  | 1.04211704   | XM       | 396194.3    |
| chrUn      | 21047538  | 21049514  | XM 625159                         | 1977   | 1977         |            | 1517      | 0.247180475 | 0.015688259 | 1.074679981 | 0.015182186  | 1.040012885 | 0.295978906  | 0.020543406  | 0.939065525 | 0.019218025  | 0.878480652  | XM       | 625159.2    |
| chr11      | 12035235  | 12041063  | AmelG11 WGA374 2.507546.507546.m  | 5829   | 5829         |            | 5541      | 0.353062275 | 0.062457104 | 1.01028819  | 0.025912697  | 0.95026365  | 0.367803646  | 0.065775208  | 1.952330667 | 0.031080593  | 0.92529875   | -        | -           |
| chr8       | 5822236   | 5886453   | AmelG8 WGA266 2.512961.512961.m   | 64218  | 63971        |            | 59802     | 0.424114052 | 0.071072339 | 1.580619393 | 0.042290074  | 0.940513739 | 0.42719307   | 0.073659705  | 1.614943356 | 0.043110523  | 0.945171487  | -        | -           |
| chr10      | 5083331   | 5087548   | AmelG10 WGA321 2.503194.503194.m  | 4218   | 4218         |            | 2804      | 0.24556662  | 0.013753853 | 1.195417752 | 0.013990989  | 1.216028402 | 0.286019971  | 0.020818378  | 0.019753945 | 0.019741565  | 0.967008051  | -        | -           |
| chr7       | 10728892  | 10731260  | XM 624234                         | 2369   | 2369         |            | 1584      | 0.207682566 | 0.008868243 | 0.843844131 | 0.016891892  | 1.590177417 | 0.272727273  | 0.013333333  | 0.729291943 | 0.025369625  | 1.38912751   | XM       | 624234.1    |
| chr4       | 3294482   | 3344769   | XM 392578                         | 50288  | 49547        |            | 46320     | 0.350374392 | 0.052600771 | 1.713917564 | 0.034838423  | 1.59157988  | 0.363684421  | 0.05582834   | 1.663794958 | 0.037269365  | 1.10700779   | XM       | 392578.3    |
| chr4       | 8670415   | 8680417   | XM 393417                         | 5657   | 5657         |            | 4724      | 0.178047224 | 0.007230723 | 0.7241379   | 0.027708457  | 1.241379    | 0.357709457  | 0.037709457  | 1.241379    | 0.037709457  | 1.241379     | XM       | 393417.3    |
| chr13      | 6344509   | 6347017   | XM 395941                         | 2509   | 2509         |            | 2099      | 0.251893185 | 0.019138756 | 0.205496488 | 0.02153126   | 1.357386399 | 0.2868032    | 0.021988528  | 1.069283415 | 0.025334608  | 0.923200047  | XM       | 395941.3    |
| chr15      | 2229233   | 2236887   | NM 001011585.1                    | 7755   | 7755         |            | 7179      | 0.293874919 | 0.025277276 | 1.17261327  | 0.024761413  | 1.148239667 | 0.310628221  | 0.027347565  | 1.135714558 | 0.025610395  | 1.100947786  | -        | -           |
| chrUn      | 241308361 | 241310937 | XM 394850                         | 2577   | 2577         |            | 1627      | 0.197516492 | 0.008152174 | 0.855422958 | 0.011257764  | 1.182129837 | 0.273509527  | 0.011764706  | 0.642780064 | 0.017373461  | 0.942754832  | XM       | 394850.3    |
| chrUn      | 129071623 | 129073491 | AmelGUn WGA2663 2.506139.506139.m | 1869   | 1869         |            | 1678      | 0.147672552 | 0.001605996 | 0.299679573 | 0.008029979  | 1.498397865 | 0.3521908397 | 0.003856041  | 0.253403551 | 0.014138817  | 0.929416355  | -        | -           |
| chr2       | 10030924  | 10035273  | XM 392568                         | 4350   | 4350         |            | 4252      | 0.382988506 | 0.055644976 | 1.517504951 | 0.03490688   | 0.940602243 | 0.389698965  | 0.05673258   | 1.494297197 | 0.035310734  | 0.930057203  | -        | -           |
| chr7       | 3381556   | 3382357   | XM 396259                         | 802    | 802          |            | 632       | 0.241895262 | 0.008739076 | 0.605194313 | 0.014981273  | 1.037469313 | 0.294303797  | 0.011146497  |             |              |              |          |             |

| chromosome | start     | end       | ID              | length | valid length without Ns | non-repetitive nr length | qcContent   | cpaContent  | cpqQ/E      | nrGContent  | nrCpGContent | nrCpGGO/E   | nrGpCContent | nrGpC/E     | RefSeqID    | version     |             |
|------------|-----------|-----------|-----------------|--------|-------------------------|--------------------------|-------------|-------------|-------------|-------------|--------------|-------------|--------------|-------------|-------------|-------------|-------------|
| chrUn      | 226989465 | 226990570 | AmelGUn WGA5203 | 1043   | 1043                    | 1043                     | 0.384467881 | 0.025911708 | 0.16705464  | 0.049904031 | 0.38421635   | 0.025911708 | 0.049904031  | 1.380321635 | -           | -           |             |
| chrUn      | 69981984  | 69985550  | XM 623154       | 3567   | 3567                    | 2943                     | 0.280908326 | 0.019068985 | 0.979756737 | 0.024957936 | 0.32482867   | 0.023168654 | 0.892602253  | 0.029642249 | 1.14405823  | XM 623154.2 |             |
| chr9       | 6852740   | 6855328   | XM 395924       | 2589   | 2589                    | 1978                     | 0.242950946 | 0.003863988 | 0.267705832 | 0.02820711  | 1.954252576  | 0.00507872  | 0.225864295  | 0.037074657 | 1.648809355 | XM 395924.2 |             |
| chrUn      | 121831949 | 121832916 | AmelGUn WGA2478 | 968    | 968                     | 968                      | 0.340909091 | 0.021750776 | 0.788709266 | 0.04860393  | 1.684969796  | 0.022750776 | 0.788709266  | 0.04860393  | 1.684969796 | XM 394773.3 |             |
| chr9       | 1097453   | 1099610   | XM 394773       | 2158   | 2158                    | 1977                     | 0.316960148 | 0.015299022 | 0.63296411  | 0.025034771 | 1.035326309  | 0.016725798 | 0.33149002   | 0.026350803 | 0.957689337 | XM 394773.3 |             |
| chr10      | 609858    | 642215    | XM 391824       | 332358 | 31639                   | 25881                    | 0.387496444 | 0.071471471 | 1.904386806 | 0.039165488 | 0.408333333  | 0.077273464 | 1.865299451  | 0.047248603 | 1.013931867 | XM 391824.2 |             |
| chr5       | 8115036   | 8130610   | AmelG5 WGA164   | 15575  | 15575                   | 15132                    | 0.477624398 | 0.080197766 | 1.417329752 | 0.042249904 | 0.746679725  | 0.4777954   | 0.08120082   | 1.432119728 | 0.042451894 | 0.74871406  | -           |
| chrUn      | 17403002  | 17404594  | XM 625188       | 1593   | 1593                    | 1091                     | 0.226616447 | 0.007537688 | 0.59146591  | 0.013190955 | 1.035065343  | 0.301558203 | 0.448595549  | 0.018467221 | 0.815628271 | -           |             |
| chr5       | 4298242   | 4307442   | XM 396579       | 9201   | 9067                    | 8696                     | 0.337597882 | 0.044787645 | 1.574762067 | 0.028792057 | 1.012347403  | 0.349701012 | 0.04652234   | 1.52470035  | 0.030055274 | 0.985016811 | XM 396579.1 |
| chrUn      | 21069566  | 21071225  | AmelGUn WGA588  | 1660   | 1660                    | 1028                     | 0.191566265 | 0.012055455 | 1.371365748 | 0.009644364 | 1.053892598  | 0.270428016 | 0.015686723  | 1.075200026 | 0.015686723 | 0.860160021 | -           |
| chr4       | 1653290   | 1720056   | XM 392318       | 66767  | 66667                   | 64181                    | 0.48997255  | 0.091803672 | 1.530233348 | 0.052523101 | 0.975633527  | 0.38261246  | 0.094449383  | 1.552988946 | 0.054008952 | 0.888045033 | XM 392318.3 |
| chr15      | 5839796   | 5842829   | XM 395316       | 3034   | 3034                    | 2153                     | 0.224456163 | 0.00505012  | 0.450776753 | 0.016485328 | 1.32581398   | 0.28325592  | 0.07002801   | 0.355369234 | 0.022408964 | 1.1371815   | XM 395316.2 |
| chrUn      | 30355266  | 30357601  | AmelGUn WGA689  | 2336   | 2336                    | 2264                     | 0.384057495 | 0.051820128 | 1.370438856 | 0.03640257  | 0.937084806  | 0.553073865 | 1.350747158  | 0.037593985 | 0.950679723 | -           |             |
| chr11      | 5430475   | 5455418   | XM 397276       | 24944  | 24944                   | 19000                    | 0.266516998 | 0.024976947 | 1.408073718 | 0.022130457 | 1.247603038  | 0.324736842 | 1.229785835  | 0.02879028  | 1.093356873 | XM 397276.3 |             |
| chr7       | 8703027   | 8733907   | XM 396777       | 30881  | 30881                   | 26013                    | 0.281499951 | 0.018911917 | 0.964865996 | 0.026943005 | 1.374603611  | 0.319071234 | 0.022234211  | 0.883610753 | 0.03167508  | 1.258800761 | XM 396777.3 |
| chr11      | 3217022   | 3219120   | XM 624524       | 2099   | 2099                    | 2099                     | 0.33158647  | 0.028598665 | 1.042917093 | 0.032888465 | 1.199354657  | 0.331458647 | 0.028598665  | 1.042917093 | 0.032888465 | 1.199354657 | XM 624524.2 |
| chr15      | 5562356   | 5566692   | XM 393106       | 4337   | 4337                    | 4189                     | 0.371224349 | 0.05304428  | 1.544068571 | 0.03597786  | 1.047281292  | 0.383146336 | 0.054971319  | 1.502258749 | 0.037284895 | 1.018923325 | XM 393106.3 |
| chr7       | 540974    | 545236    | XM 392686       | 4263   | 4263                    | 4134                     | 0.348346232 | 0.050860432 | 1.670230387 | 0.032379165 | 1.068237164  | 0.357764877 | 0.052312909  | 1.636485843 | 0.033421336 | 1.045526262 | XM 392686.2 |
| chr15      | 4157376   | 4162549   | AmelG15 WGA434  | 5174   | 5174                    | 4142                     | 0.229029764 | 0.011405374 | 0.870879169 | 0.017784651 | 1.357981077  | 0.266537904 | 0.014289174  | 0.806618238 | 0.021554856 | 1.216763105 | -           |
| chr1       | 11291763  | 11295468  | XM 624545       | 3706   | 3706                    | 2766                     | 0.248515925 | 0.012145749 | 1.814044948 | 0.032479111 | 1.312818645  | 0.016465423 | 0.696310781  | 0.025978778 | 0.986626376 | XM 624545.2 |             |
| chrUn      | 179033415 | 179034676 | AmelGUn WGA3956 | 1262   | 1262                    | 571                      | 0.153724247 | 0.003172086 | 0.541595537 | 0.010309278 | 1.760185496  | 0.267950963 | 0.007117438  | 0.397358992 | 0.023131673 | 1.291416724 | -           |
| chrUn      | 250718870 | 250721998 | XM 624742       | 3129   | 3129                    | 2673                     | 0.316714605 | 0.036764706 | 1.472019715 | 0.031010213 | 1.241616629  | 0.358398803 | 0.04276069   | 1.338740909 | 0.036384096 | 1.139140107 | XM 624742.1 |
| chr4       | 646815    | 648019    | XM 624590       | 1205   | 1205                    | 708                      | 0.184232365 | 0.008305648 | 1.011660792 | 0.008305648 | 1.011660792  | 0.251412429 | 0.012802272  | 0.844717659 | 0.009957326 | 0.657002624 | XM 624590.2 |
| chr12      | 1561231   | 1624881   | XM 391921       | 63651  | 63601                   | 49307                    | 0.26248015  | 0.026321169 | 1.528270431 | 0.021876629 | 1.312166629  | 0.33348272  | 1.368936735  | 0.032956975 | 0.983426756 | XM 391921.3 |             |
| chrUn      | 3068368   | 3072744   | XM 623222       | 4377   | 4377                    | 3179                     | 0.264336303 | 0.01416819  | 0.811089639 | 0.024451554 | 1.399787372  | 0.330921673 | 0.018939394  | 0.691832183 | 0.03219697  | 1.176114711 | XM 623222.2 |
| chrUn      | 2294186   | 2294382   | AmelGUn WGA592  | 392    | 392                     | 392                      | 0.239320388 | 0.019181240 | 0.948505776 | 0.019181240 | 0.948505776  | 0.017550763 | 0.017550763  | 0.017550763 | 0.017550763 | 0.017550763 | -           |
| chr1       | 2599165   | 2602561   | AmelGUn WGA58   | 3397   | 3397                    | 3397                     | 0.490432735 | 0.089222615 | 0.84333254  | 0.042108363 | 1.73828691   | 0.490432735 | 0.089222615  | 0.84333254  | 0.042108363 | 1.73828691  | -           |
| chr16      | 582170    | 616524    | XM 392106       | 34455  | 34023                   | 31816                    | 0.39152926  | 0.06563786  | 1.751938716 | 0.036419753 | 0.952103428  | 0.401621825 | 0.069411654  | 1.723557882 | 0.03687947  | 0.906658792 | XM 392106.3 |
| chr1       | 14050095  | 14062022  | AmelG1 WGA39    | 11928  | 11928                   | 11412                    | 0.32964534  | 0.041502473 | 1.528315962 | 0.028711376 | 1.03740235   | 0.341833216 | 0.043436293  | 1.487458762 | 0.029484029 | 1.096068978 | -           |
| chrUn      | 10355519  | 10357130  | XM 392626       | 1612   | 1612                    | 1612                     | 0.214640199 | 0.012414649 | 0.780758862 | 0.015581312 | 1.348483227  | 0.312169312 | 0.021299255  | 0.877908556 | 0.026624068 | 1.097385695 | XM 392626.3 |
| chrUn      | 164185260 | 164188954 | XM 397078       | 3695   | 3695                    | 3191                     | 0.282273342 | 0.007579859 | 0.383843357 | 0.025175961 | 1.274908294  | 0.314634911 | 0.008796733  | 0.359147897 | 0.029217719 | 1.192884087 | XM 397078.2 |
| chr1       | 3533243   | 3536478   | XM 624782       | 3236   | 3236                    | 2298                     | 0.338071693 | 0.039876352 | 1.412017259 | 0.021638331 | 1.766210916  | 0.42254314  | 0.056233653  | 1.260329767 | 0.030078466 | 0.674129875 | XM 624782.1 |
| chrUn      | 10755543  | 10760906  | XM 392132       | 4364   | 4364                    | 3729                     | 0.291246563 | 0.031172122 | 1.474515726 | 0.02429521  | 1.49254904   | 0.32877447  | 0.03656897   | 1.357421277 | 0.028233396 | 1.048009074 | XM 392132.3 |
| chrUn      | 1159564   | 12203969  | AmelGUn WGA2311 | 2594   | 2594                    | 2134                     | 0.341989759 | 0.034198975 | 1.67077424  | 0.049517014 | 1.94515404   | 0.341989759 | 0.034198975  | 1.94515404  | 0.034198975 | 1.94515404  | -           |
| chrUn      | 27178985  | 27188372  | XM 396061       | 9388   | 9338                    | 5651                     | 0.186656622 | 0.00856898  | 0.983460094 | 0.012210797 | 1.041977759  | 0.2502212   | 0.013183681  | 0.842643743 | 0.018884732 | 1.207030226 | XM 396061.3 |
| chrUn      | 137884925 | 137890690 | XM 395097       | 5766   | 5766                    | 4923                     | 0.296219216 | 0.020294883 | 0.926906742 | 0.02722333  | 1.037818719  | 0.335770871 | 0.023412052  | 0.832008025 | 0.026058632 | 0.926061106 | -           |
| chrUn      | 64731367  | 64735176  | AmelGUn WGA1217 | 3810   | 3810                    | 2990                     | 0.226771654 | 0.003675505 | 0.282775762 | 0.01680231  | 1.313260628  | 0.271906355 | 0.004699564  | 0.256214515 | 0.02047667  | 1.116363245 | -           |
| chrUn      | 4554913   | 4558791   | AmelGUn WGA468  | 3879   | 3879                    | 2926                     | 0.261923176 | 0.02166065  | 1.263770223 | 0.02217638  | 1.29385999   | 0.314764183 | 0.027815934  | 1.125025755 | 0.034747257 | 1.113136549 | -           |
| chrUn      | 105384601 | 105385228 | AmelGUn WGA2050 | 628    | 628                     | 577                      | 0.281847134 | 0.006379585 | 0.343435214 | 0.014354067 | 0.77272932   | 0.030159792 | 0.006956522  | 0.328981225 | 0.015652174 | 0.740207757 | -           |
| chrUn      | 51973778  | 51976212  | XM 395039       | 2435   | 2435                    | 1937                     | 0.22587269  | 0.006573541 | 1.519680088 | 0.011052851 | 0.876660148  | 0.26639148  | 0.008281573  | 0.473200034 | 0.013457557 | 0.768950055 | XM 395039.3 |
| chrUn      | 12544007  | 12554732  | AmelGUn WGA2571 | 726    | 726                     | 692                      | 0.26787531  | 0.045309273 | 1.425309273 | 0.045309273 | 1.425309273  | 0.045309273 | 0.045309273  | 1.425309273 | 0.045309273 | 1.425309273 | -           |
| chrUn      | 167209249 | 167209994 | AmelGUn WGA3651 | 746    | 746                     | 695                      | 0.380697051 | 0.029530202 | 0.835062476 | 0.059060405 | 1.670124952  | 0.380697051 | 0.029530202  | 0.835062476 | 0.059060405 | 1.670124952 | -           |
| chrUn      | 288539507 | 288540270 | XM 625118       | 764    | 764                     | 544                      | 0.218586387 | 0.003931848 | 0.337997634 | 0.020969856 | 1.802645046  | 0.284132841 | 0.005586592  | 0.805632638 | 0.025975158 | 1.496707401 | XM 625118.2 |
| chr3       | 10790945  | 10794338  | XM 394446       | 3394   | 3394                    | 2886                     | 0.27578079  | 0.01061008  | 0.577995368 | 0.023872679 | 1.304089579  | 0.31582814  | 0.012517385  | 0.528029191 | 0.028164117 | 1.188065681 | XM 394446.3 |
| chrUn      | 60525244  | 60535386  | XM 397561       | 10143  | 10093                   | 7457                     | 0.211631824 | 0.017243088 | 1.540107941 | 0.014666355 | 1.309976869  | 0.260024138 | 0.022923409  | 1.356293129 | 0.019282632 | 1.140881867 | XM 397561.2 |
| chrUn      | 84930736  | 84931382  | AmelGUn WGA1619 | 647    | 647                     | 551                      | 0.28438499  | 0.013931889 | 0.695695328 | 0.027863777 | 1.391390655  | 0.324863884 | 0.016933494  | 0.626992388 | 0.032786885 | 1.253984775 | -           |
| chr11      | 11640150  | 11611266  | XM 397373       | 7117   | 7067                    | 6400                     | 0.313145606 | 0.042887743 | 1.749452494 | 0.023779193 | 0.969993462  | 0.33609395  | 0.046843177  | 1.658767647 | 0.026319912 | 0.932016605 | XM 397373.2 |
| chrUn      | 12395152  | 12398181  | XM 393462       | 3030   | 3030                    | 2719                     | 0.315841584 | 0.040937603 | 1.652206967 | 0.027071641 | 1.02588478   | 0.326590658 | 0.043109801  | 1.619357955 | 0.028371408 | 1.065731033 | XM 393462.3 |
| chr9       | 3859592   | 3859596   | AmelGUn WGA287  | 2023   | 2023                    | 2023                     | 0.331550802 | 0.038512971 | 1.415113623 | 0.029018454 | 1.066248905  | 0.341940858 | 0.039889903  | 1.37885824  | 0.030168219 | 1.05151332  | -           |
| chr11      | 508838    | 512471    | XM 623394       | 3634   | 3634                    | 2793                     | 0.266097964 | 0.023671897 | 1.34815432  | 0.021194605 | 1.207068403  | 0.321160043 | 0.029834651  | 1.163899191 | 0.026420115 | 0.967370373 | XM 623394.2 |
| chrUn      | 3783152   | 3796017   | XM 623743       | 12866  | 12866                   |                          |             |             |             |             |              |             |              |             |             |             |             |

| chromosome | start     | end       | ID              | lenpath           | valid | lenpath without Ns | non-repetitive | nr | lenpath | qcContent    | cpaContent  | cpqo/E       | qpcContent  | qpcqo/E      | nrGCcontent  | nrCpGContent | nrCpGGO/E     | nrGpCCContent | nrGpCCo/E    | RefSeqID    | version |
|------------|-----------|-----------|-----------------|-------------------|-------|--------------------|----------------|----|---------|--------------|-------------|--------------|-------------|--------------|--------------|--------------|---------------|---------------|--------------|-------------|---------|
| chrUn      | 44514520  | 44586868  | AmelGUn WGA888  | 2.500667.500667.m | 72349 | 72249              | 61791          |    | 2758    | 0.286744453  | 0.034839299 | 0.040490451  | 0.024028953 | 0.177746825  | 0.319107961  | 0.040200679  | 0.1579132097  | 0.028023575   | 0.100800485  | -           |         |
| chr11      | 519174    | 521963    | AmelG11 WGA346  | 2.512049.512049.m | 2790  | 2790               | 2758           |    | 2137    | 0.375985663  | 0.068483227 | 0.19396898   | 0.029401219 | 0.832746406  | 0.3799885497 | 0.069303338  | 0.1921698298  | 0.029753266   | 0.825022306  | -           |         |
| chr10      | 3010222   | 3012862   | AmelG10 WGA316  | 2.504362.504362.m | 2641  | 2641               | 2137           |    | 4087    | 0.005681817  | 0.025579958 | 0.005681817  | 0.015151515 | 0.134879888  | 0.270940571  | 0.0607052186 | 0.007054286   | 0.01880583    | 0.1027664001 | -           |         |
| chr16      | 2774584   | 2778836   | AmelG16 WGA452  | 2.503226.503226.m | 4255  | 4255               | 1062           |    | 5523    | 0.380963572  | 0.064814165 | 0.700414467  | 0.035496004 | 0.978465234  | 0.388059701  | 0.064199561  | 0.1705429342  | 0.037000735   | 0.982894479  | -           |         |
| chr9       | 9655792   | 9675878   | XM 625233       |                   | 10087 | 9991               |                |    | 1062    | 0.177359644  | 0.007708479 | 0.98274525   | 0.012013215 | 0.531551038  | 0.254571791  | 0.012780719  | 0.790195238   | 0.019536242   | 0.207869683  | GM 625239.2 |         |
| chr6       | 13492013  | 13492467  | AmelG6 WGA211   | 2.502932.502932.m | 455   | 455                | 341            |    | 1279    | 0.283515624  | 0.004405286 | 0.004405286  | 0.033039648 | 0.680597798  | 0.363636364  | 0.00591716   | 0.182486998   | 0.043478698   | 0.1371352487 | -           |         |
| chrUn      | 21588741  | 21590190  | XM 392785       |                   | 1450  | 1450               |                |    | 1582    | 0.264827586  | 0.011042098 | 0.664681947  | 0.019323671 | 0.163193407  | 0.295543393  | 0.01254902   | 0.607612869   | 0.021960784   | 0.1063322521 | XM 392785.3 |         |
| chrUn      | 78093931  | 78096538  | AmelGUn WGA1484 | 2.502123.502123.m | 2608  | 2608               |                |    | 29860   | 0.019946298  | 0.624377633 | 0.01276122   | 0.140571144 | 0.312262958  | 0.031766201  | 0.314517742  | 0.027954257   | 0.156775613   | -            |             |         |
| chr10      | 6079012   | 6109828   | XM 393715       |                   | 30817 | 30817              |                |    | 1050    | 0.454846351  | 0.078660436 | 0.523004696  | 0.045301142 | 0.071109965  | 0.456395317  | 0.080199745  | 0.154094758   | 0.046216234   | 0.887992758  | XM 393715.3 |         |
| chr8       | 641798    | 644033    | XM 397451       |                   | 2236  | 2236               |                |    | 25436   | 0.317531306  | 0.014765101 | 0.023932222  | 0.025950783 | 0.102982027  | 0.348697951  | 0.016582915  | 0.54569826    | 0.04683216    | 0.984569722  | XM 397451.3 |         |
| chr3       | 2694176   | 2721640   | XM 396734       |                   | 27465 | 26661              |                |    | 1062    | 0.413075278  | 0.06455606  | 0.513812189  | 0.04351251  | 0.1020349878 | 0.42133197   | 0.066942149  | 0.1508976226  | 0.043835589   | 0.984693481  | XM 396734.3 |         |
| chrUn      | 41530211  | 41532158  | AmelGUn WGA838  | 2.501334.501334.m | 1948  | 1948               |                |    | 20712   | 0.00208053   | 0.334362758 | 0.013358788  | 0.013358788 | 0.738686339  | 0.262711864  | 0.00379867   | 0.226037126   | 0.022792023   | 0.1356222758 | -           |         |
| chrUn      | 18071717  | 18074050  | XM 623283       |                   | 2334  | 2334               |                |    | 3065    | 0.344901457  | 0.043291899 | 0.032417475  | 0.032417475 | 0.379343629  | 0.048886738  | 0.1360161757 | 0.05818006    | 0.996545159   | -            |             |         |
| chr5       | 5276081   | 5279220   | AmelG5 WGA159   | 2.510935.510935.m | 3140  | 3140               |                |    | 4583    | 0.43566879   | 0.068811723 | 0.1451143598 | 0.035998726 | 0.759163086  | 0.445676998  | 0.070238484  | 0.1415456166  | 0.036916041   | 0.743937427  | -           |         |
| chr16      | 2262993   | 2268239   | AmelG16 WGA451  | 2.503893.503893.m | 5247  | 5197               |                |    | 1470    | 0.304021551  | 0.031376323 | 0.1357889524 | 0.025216554 | 0.1091309985 | 0.321623391  | 0.035003282  | 0.13548185736 | 0.027346314   | 0.1057957606 | -           |         |
| chrUn      | 188934179 | 188935648 | AmelGUn WGA4215 | 2.503472.503472.m | 1470  | 1470               |                |    | 898     | 0.424489796  | 0.042886317 | 0.950252573  | 0.058543227 | 0.1299590711 | 0.424489796  | 0.042886317  | 0.950252573   | 0.058543227   | 0.1299590711 | -           |         |
| chrUn      | 294341731 | 294342628 | AmelGUn WGA6959 | 2.500826.500826.m | 898   | 898                |                |    | 4253    | 0.365256125  | 0.026755853 | 0.805195804  | 0.039018952 | 0.17424388   | 0.365256125  | 0.026755853  | 0.805195804   | 0.039018952   | 0.17424388   | -           |         |
| chr4       | 5217282   | 5223028   | XM 392338       |                   | 5747  | 5747               |                |    | 13785   | 0.223072908  | 0.007135399 | 0.580095868  | 0.019639889 | 0.1612949487 | 0.281213261  | 0.009685802  | 0.497329854   | 0.025986298   | 0.1334296808 | XM 392338.3 |         |
| chr10      | 2362828   | 2381101   | XM 393655       |                   | 18274 | 18221              |                |    | 14985   | 0.188468692  | 0.003101737 | 0.349532359  | 0.01426799  | 0.160784851  | 0.257142857  | 0.004793864  | 0.29025399    | 0.019175455   | 0.161015959  | -           |         |
| chr14      | 3502520   | 3521558   | AmelG14 WGA411  | 2.522087.522087.m | 16309 | 16309              |                |    | 1465    | 0.37096801   | 0.058253618 | 0.693630646  | 0.029372087 | 0.853946399  | 0.387320654  | 0.062947354  | 0.1678633082  | 0.031908489   | 0.850911775  | -           |         |
| chrUn      | 20611222  | 20612866  | XM 624946       |                   | 1645  | 1645               |                |    | 2355    | 0.385410334  | 0.021289538 | 0.625527568  | 0.025547445 | 0.751230921  | 0.425255973  | 0.023939808  | 0.580724891   | 0.02872777    | 0.69686969   | GM 624946.2 |         |
| chrUn      | 31395725  | 31403047  | XM 392738       |                   | 7233  | 7273               |                |    | 948     | 0.28488937   | 0.019942236 | 0.983717849  | 0.02405749  | 0.194029941  | 0.344106798  | 0.025396825  | 0.858469196   | 0.030335097   | 0.1025393762 | -           |         |
| chr9       | 5518783   | 5521662   | AmelG9 WGA292   | 2.503615.503615.m | 2880  | 2880               |                |    | 23436   | 0.254513891  | 0.01354637  | 0.983787303  | 0.019103856 | 0.181776966  | 0.292569002  | 0.016609881  | 0.777387077   | 0.032424191   | 0.10635109   | -           |         |
| chrUn      | 179187772 | 179188719 | AmelGUn WGA3960 | 2.505809.505809.m | 948   | 948                |                |    | 1062    | 0.445147679  | 0.05279831  | 0.1099602633 | 0.068637804 | 0.1429483422 | 0.445147679  | 0.05279831   | 0.1099602633  | 0.068637804   | 0.1429483422 | -           |         |
| chrUn1     | 4718441   | 4718441   | 395967          |                   | 294   | 294                |                |    | 3588    | 0.21705716   | 0.004708784 | 0.004708784  | 0.012705716 | 0.004708784  | 0.012705716  | 0.004708784  | 0.012705716   | 0.004708784   | 0.012705716  | XM 396967.2 |         |
| chr15      | 306531    | 306531    | XM 392070       |                   | 9710  | 9710               |                |    | 1062    | 0.683931728  | 0.578918356 | 0.338108971  | 0.088053182 | 0.42268257   | 0.01742379   | 0.01742379   | 0.01742379    | 0.01742379    | 0.01742379   | XM 392070.3 |         |
| chrUn      | 14585744  | 14587052  | XM 624621       |                   | 1309  | 1309               |                |    | 785     | 0.203208556  | 0.00938838  | 0.014355229  | 0.014525994 | 0.1482519181 | 0.289171975  | 0.016645327  | 0.853918275   | 0.021766965   | 0.11666236   | XM 624621.2 |         |
| chr13      | 1023      | 2918      | XM 393883       |                   | 1896  | 1896               |                |    | 1648    | 0.270042194  | 0.013720317 | 0.7515186932 | 0.023218977 | 0.178008654  | 0.30157767   | 0.015824711  | 0.697746536   | 0.026171637   | 0.153965425  | -           |         |
| chr14      | 5119088   | 5151876   | XM 397022       |                   | 32789 | 32789              |                |    | 10485   | 0.360466201  | 0.036446261 | 0.142403952  | 0.022569233 | 0.881832018  | 0.336886994  | 0.03910229   | 0.1378832697  | 0.024217133   | 0.853949326  | -           |         |
| chrUn      | 110196583 | 110198485 | AmelGUn WGA2174 | 2.511648.511648.m | 1903  | 1903               |                |    | 3065    | 0.293746716  | 0.019453207 | 0.986072181  | 0.01929872  | 0.317571512  | 0.021650088  | 0.864344849  | 0.040374488   | 0.161188634   | 0.00374488   | XM 393883.3 |         |
| chr7       | 602173    | 603684    | XM 623692       |                   | 1512  | 1393               |                |    | 966     | 0.2225421278 | 0.006470165 | 0.55065903   | 0.016534867 | 0.402739743  | 0.295031055  | 0.009375     | 0.454647474   | 0.022916667   | 0.118687225  | -           |         |
| chr7       | 340561    | 366064    | AmelG7 WGA214   | 2.505938.505938.m | 2550  | 24632              |                |    | 23436   | 0.437398506  | 0.078075518 | 0.632792406  | 0.045457978 | 0.929749186  | 0.052175155  | 0.081257743  | 0.641368374   | 0.038182766   | 0.932870248  | -           |         |
| chrUn7     | 291074079 | 291624681 | AmelGUn WGA4934 | 2.506820.506820.m | 1253  | 1513               |                |    | 1062    | 0.346633416  | 0.060712853 | 0.034916972  | 0.014916972 | 0.778031921  | 0.01513415   | 0.066718194  | 0.03415138    | 0.066718194   | 0.03415138   | -           |         |
| chr7       | 7126993   | 7157118   | XM 001011576.1  |                   | 30126 | 29827              |                |    | 24251   | 0.249337848  | 0.025650483 | 0.165275488  | 0.017234442 | 0.110478442  | 0.287410828  | 0.030995241  | 0.1502077417  | 0.020566936   | 0.996705576  | -           |         |
| chrUn      | 201736588 | 201737994 | AmelGUn WGA4546 | 2.504141.504141.m | 1407  | 1407               |                |    | 1017    | 0.28855321   | 0.009246088 | 0.014710727  | 0.017782049 | 0.13784089   | 0.284169125  | 0.011857708  | 0.59512308    | 0.023715415   | 0.190246161  | -           |         |
| chr8       | 9340278   | 9385856   | XM 623696       |                   | 5579  | 5579               |                |    | 3622    | 0.217962008  | 0.011115095 | 0.393593751  | 0.015238437 | 0.287826376  | 0.295416897  | 0.016652789  | 0.765073636   | 0.023036359   | 0.105831863  | XM 623696.2 |         |
| chr1       | 6448870   | 6449952   | AmelG1 WGA17    | 2.502007.502007.m | 1083  | 1083               |                |    | 6220    | 0.012526316  | 0.010166359 | 0.926136712  | 0.012014787 | 0.149525205  | 0.319354839  | 0.017857149  | 0.706202234   | 0.019480519   | 0.770402437  | -           |         |
| chr8       | 1976151   | 1980631   | AmelGUn WGA2956 | 2.509786.509786.m | 4481  | 4481               |                |    | 3587    | 0.245704084  | 0.009151786 | 0.615911117  | 0.014285714 | 0.961422232  | 0.288263173  | 0.011468531  | 0.561494928   | 0.017622378   | 0.962783629  | -           |         |
| chr5       | 12367446  | 12460792  | XM 392395       |                   | 93347 | 87732              |                |    | 80691   | 0.346053891  | 0.056745512 | 0.189629068  | 0.030983186 | 0.035325508  | 0.36442726   | 0.060622238  | 0.1862993129  | 0.032936882   | 0.992253148  | -           |         |
| chrUn1     | 137467461 | 137467461 | AmelGUn WGA2878 | 2.502800.502800.m | 1181  | 1111               |                |    | 1062    | 0.348856901  | 0.01779661  | 0.348856901  | 0.01779661  | 0.348856901  | 0.01779661   | 0.01779661   | 0.01779661    | 0.01779661    | 0.01779661   | XM 392395.3 |         |
| chrUn      | 34176683  | 34177783  | AmelGUn WGA738  | 2.513019.513019.m | 1101  | 1101               |                |    | 871     | 0.243415077  | 0.007366343 | 0.019090909  | 0.034357467 | 0.280137773  | 0.009205984  | 0.497323253  | 0.02301496    | 0.243330632   | 0.996705576  | -           |         |
| chrUn      | 33603630  | 33604503  | AmelGUn WGA731  | 2.508009.508009.m | 874   | 824                |                |    | 585     | 0.208737864  | 0.010948905 | 0.104182604  | 0.015815085 | 0.503930429  | 0.266666667  | 0.013793103  | 0.809942489   | 0.022413793   | 0.136155645  | -           |         |
| chr3       | 7562943   | 7564997   | XM 393151       |                   | 2055  | 2055               |                |    | 1765    | 0.294890511  | 0.010223953 | 0.496795616  | 0.027263871 | 0.32478831   | 0.339376771  | 0.011945392  | 0.438467516   | 0.031285552   | 0.14836259   | XM 393151.3 |         |
| chr8       | 3692186   | 3702436   | XM 625086       |                   | 10251 | 10057              |                |    | 8216    | 0.261708263  | 0.021486124 | 0.1260853948 | 0.021287178 | 0.1249179375 | 0.302945472  | 0.025775715  | 0.129524904   | 0.025897874   | 0.134878102  | -           |         |
| chrUn      | 304696180 | 304697091 | AmelGUn WGA7228 | 2.510680.510680.m | 912   | 912                |                |    | 912     | 0.352631631  | 0.030735456 | 0.986666618  | 0.047200878 | 0.514623735  | 0.355263158  | 0.030735456  | 0.986266618   | 0.047200878   | 0.514623735  | -           |         |
| chr10      | 3136169   | 3146675   | XM 391844       |                   | 10507 | 10507              |                |    | 9795    | 0.458646517  | 0.085653314 | 0.163405215  | 0.0513992   | 0.980427129  | 0.455334354  | 0.086196319  | 0.166491704   | 0             |              |             |         |

| chromosome | start     | end       | ID              | length            | valid length | without Ns | non-repetitive | nr length | qcContent   | cpaContent  | cpqD/E      | qpcContent  | qpcD/E      | nrGContent  | nrCpGContent | nrCpGGO/E   | nrGpCContent | nrGpCpCContent | RefSeqID | version  |
|------------|-----------|-----------|-----------------|-------------------|--------------|------------|----------------|-----------|-------------|-------------|-------------|-------------|-------------|-------------|--------------|-------------|--------------|----------------|----------|----------|
| chrUn      | 221089863 | 221092749 | AmelGUn WGA5049 | 2.509660.509660.m | 2887         | 2887       | 2887           | 2887      | 0.438863873 | 0.074497574 | 0.548367333 | 0.044005544 | 0.014616983 | 0.438863873 | 0.074497574  | 1.548367333 | 0.044005544  | 0.914616983    | -        | -        |
| chr2       | 9887335   | 9888828   | XM 395591       | 1494              | 1494         | 1494       | 852            | 852       | 0.219544846 | 0.012056263 | 1.003543243 | 0.028131279 | 0.24161009  | 0.335680751 | 0.012276596  | 0.75709637  | 0.048463577  | 1.724497288    | XM       | 395591.2 |
| chrUn      | 7856408   | 7865597   | AmelGUn WGA485  | 2.503646.503646.m | 19190        | 8931       | 8145           | 8145      | 0.343522562 | 0.05062157  | 1.716365794 | 0.031582484 | 1.070829986 | 0.369674647 | 0.055487205  | 1.624769613 | 0.034448819  | 1.008726146    | -        | -        |
| chrUn      | 20296547  | 20300463  | XM 395283       | 3916              | 3916         | 3916       | 2619           | 2619      | 0.22165475  | 0.004851229 | 0.493081782 | 0.013389895 | 1.527467806 | 0.293836395 | 0.057847772  | 0.32258078  | 0.025245479  | 1.206696625    | XM       | 395283.3 |
| chrUn      | 183381303 | 18338332  | XM 624762       | 1930              | 1930         | 1930       | 1619           | 1619      | 0.243523316 | 0.016070503 | 1.084438697 | 0.017107309 | 1.154402448 | 0.277949351 | 0.019218847  | 0.995567033 | 0.01963881   | 1.027682099    | XM       | 624762.2 |
| chr3       | 7064124   | 7070000   | XM 394417       | 5877              | 5877         | 5877       | 4472           | 4472      | 0.257954739 | 0.021443159 | 1.296617685 | 0.020081688 | 1.214292752 | 0.037011556 | 0.027391109  | 1.11102068  | 0.025730454  | 1.029135522    | XM       | 394417.3 |
| chr14      | 1676244   | 1680722   | XM 392020       | 4479              | 4479         | 4479       | 4354           | 4354      | 0.404777852 | 0.067664136 | 1.657678863 | 0.031263957 | 0.765924227 | 0.414561323 | 0.069211313  | 1.616981376 | 0.032191308  | 0.752084361    | -        | -        |
| chr9       | 863156    | 876053    | XM 395212       | 12898             | 12898        | 12898      | 12541          | 12541     | 0.448984339 | 0.065674188 | 1.316028218 | 0.051872528 | 1.039460304 | 0.459054302 | 0.067124272  | 1.287233729 | 0.052837417  | 1.013256515    | XM       | 395212.3 |
| chrUn      | 82009847  | 82016704  | AmelGUn WGA1563 | 2.500955.500955.m | 6858         | 6788       | 3145           | 3145      | 0.172362994 | 0.004420866 | 0.624178464 | 0.00928382  | 1.310774775 | 0.253418124 | 0.007707129  | 0.493790689 | 0.017662171  | 1.131603662    | -        | -        |
| chr2       | 2419798   | 2422240   | XM 623129       | 2443              | 2443         | 2443       | 1889           | 1889      | 0.240687679 | 0.007780508 | 0.53903221  | 0.022932023 | 1.08726513  | 0.289041821 | 0.009579564  | 0.460233974 | 0.028738691  | 1.380701922    | XM       | 623129.2 |
| chr4       | 7588737   | 7591618   | XM 393068       | 2882              | 2882         | 2882       | 2376           | 2376      | 0.293546102 | 0.02086102  | 0.981012776 | 0.02086102  | 0.981012776 | 0.341750842 | 0.024926067  | 0.869638152 | 0.024081115  | 0.840158893    | XM       | 393068.3 |
| chr6       | 663974    | 672849    | AmelG6 WGA180   | 2.503091.503091.m | 8876         | 8876       | 8108           | 8108      | 0.324245155 | 0.0314972   | 1.213634223 | 0.026816901 | 1.029717954 | 0.341021214 | 0.034086699  | 1.1776892   | 0.02877609   | 1.994208636    | -        | -        |
| chr5       | 6053126   | 6059432   | XM 625146       | 6307              | 6307         | 6307       | 5439           | 5439      | 0.278420802 | 0.020773866 | 1.071954157 | 0.025055603 | 1.292891274 | 0.314396029 | 0.023431734  | 0.948622645 | 0.05151292   | 1.179678566    | XM       | 625146.2 |
| chr14      | 2884888   | 2889258   | XM 393989       | 4371              | 4371         | 4371       | 3584           | 3584      | 0.278883551 | 0.009839817 | 0.506059409 | 0.025171625 | 1.294570581 | 0.325613839 | 0.011761411  | 0.443751212 | 0.030523663  | 1.151640051    | XM       | 393989.3 |
| chr6       | 11434048  | 11436511  | XM 395160       | 2464              | 2464         | 2464       | 1876           | 1876      | 0.246347403 | 0.017052375 | 1.12398238  | 0.01908242  | 1.257789807 | 0.306503198 | 0.022007515  | 0.93752535  | 0.025228127  | 1.074724182    | XM       | 395160.2 |
| chrUn      | 1566993   | 1569783   | AmelGUn WGA458  | 2.501637.501637.m | 2791         | 2791       | 2707           | 2707      | 0.539591544 | 0.089964158 | 1.236817788 | 0.064516129 | 0.886960963 | 0.542667159 | 0.092455621  | 1.25594759  | 0.064349112  | 0.874139522    | -        | -        |
| chr1       | 6698142   | 6751031   | XM 393243       | 52890             | 51604        | 47205      | 42705          | 42705     | 0.310092241 | 0.044862602 | 1.826622728 | 0.044217658 | 1.015741096 | 0.330748861 | 0.04892181   | 1.788817389 | 0.056272714  | 1.071626625    | XM       | 393243.3 |
| chrUn      | 25455140  | 25741492  | AmelGUn WGA632  | 2.507835.507835.m | 81573        | 16253      | 8251           | 8251      | 0.193010521 | 0.012615385 | 1.354864986 | 0.0152      | 1.632447708 | 0.29620652  | 0.023716381  | 1.08146739  | 0.027017115  | 1.231980893    | -        | -        |
| chr8       | 8550287   | 8639859   | XM 394762       | 81573             | 79548        | 69868      | 6108           | 6108      | 0.312503143 | 0.043210963 | 1.770598881 | 0.022127232 | 1.090678508 | 0.34104311  | 0.048557899  | 1.670239226 | 0.024838571  | 0.854368824    | XM       | 394762.3 |
| chr4       | 632337    | 636129    | AmelG4 WGA127   | 2.507419.507419.m | 3793         | 3743       | 3502           | 3502      | 0.231132781 | 0.045442395 | 1.765897446 | 0.027800053 | 1.386031374 | 0.336950313 | 0.048627002  | 1.171058099 | 0.029748284  | 1.050435543    | -        | -        |
| chr4       | 4690706   | 4691939   | XM 396566       | 1234              | 1234         | 1234       | 1170           | 1170      | 0.442463533 | 0.060827251 | 1.308115671 | 0.04217356  | 0.906906261 | 0.437606838 | 0.0625       | 1.357260137 | 0.040239726  | 1.187385247    | XM       | 396566.3 |
| chrUn      | 113837432 | 113845072 | XM 395273       | 7641              | 7641         | 6110       | 6110           | 6110      | 0.259521005 | 0.015706806 | 0.940667707 | 0.020811518 | 1.246384712 | 0.307037643 | 0.019372845  | 0.829464292 | 0.025939111  | 0.810638628    | XM       | 395273.3 |
| chr7       | 1423914   | 1427511   | AmelG7 WGA217   | 2.506607.506607.m | 3598         | 3598       | 3529           | 3529      | 0.37965364  | 0.063386155 | 1.765092449 | 0.036975257 | 1.029637262 | 0.383111363 | 0.064397163  | 1.762464905 | 0.037446809  | 1.02486946     | -        | -        |
| chr7       | 8165725   | 8386996   | XM 394703       | 221272            | 217510       | 205050     | 1074           | 1074      | 0.35412798  | 0.048543198 | 1.76555274  | 0.026299213 | 1.903430211 | 0.354801268 | 0.051291819  | 1.631576727 | 0.027750916  | 0.892747949    | XM       | 394703.3 |
| chrUn      | 4034826   | 4036717   | XM 393026       | 1892              | 1892         | 1074       | 1074           | 1074      | 0.209830867 | 0.005288207 | 0.489147423 | 0.017349339 | 1.271783301 | 0.304469274 | 0.008450704  | 0.379641864 | 0.024413146  | 0.096743164    | XM       | 393026.3 |
| chr2       | 6407632   | 6414462   | AmelG16 WGA76   | 2.502731.502731.m | 12774        | 12774      | 12774          | 12774     | 0.303461323 | 0.047210627 | 1.451013023 | 0.025370829 | 1.320570782 | 0.320570782 | 0.028154659  | 1.040594297 | 0.040594297  | 1.040594297    | -        | -        |
| chr13      | 569432    | 574148    | AmelG14 WGA411  | 2.506550.506550.m | 4717         | 4667       | 4181           | 4181      | 0.258410114 | 0.015005359 | 0.904581763 | 0.022508079 | 1.356873251 | 0.28327059  | 0.041629622  | 0.858559649 | 0.025052697  | 0.872612241    | -        | -        |
| chrUn      | 38870558  | 38872359  | XM 396628       | 1802              | 1802         | 1230       | 1230           | 1230      | 0.230299667 | 0.012770683 | 0.966643654 | 0.01721266  | 1.302867534 | 0.305691057 | 0.018806214  | 0.808867704 | 0.025347506  | 1.009212993    | XM       | 396628.3 |
| chr9       | 5511210   | 5513727   | AmelG9 WGA292   | 2.503114.503114.m | 2518         | 2518       | 1959           | 1959      | 0.234710087 | 0.008740564 | 0.63545755  | 0.019864919 | 1.444215341 | 0.283818275 | 0.021128784  | 0.561747115 | 0.024414931  | 1.20009611     | -        | -        |
| chrUn      | 3880078   | 3896399   | XM 397458       | 18562             | 18562        | 15205      | 15205          | 15205     | 0.294253585 | 0.03178708  | 1.486902917 | 0.024998653 | 1.169360938 | 0.334692535 | 0.038124134  | 1.361363126 | 0.029681419  | 1.059884787    | XM       | 397458.3 |
| chr16      | 1254517   | 1274268   | XM 394131       | 19752             | 19752        | 18549      | 18549          | 18549     | 0.313588497 | 0.04369399  | 1.77476559  | 0.024910131 | 1.013443372 | 0.328966521 | 0.046497813  | 1.719175392 | 0.026516174  | 0.980389219    | -        | -        |
| chrUn      | 40241327  | 42021376  | XM 393251       | 7050              | 7050         | 5843       | 5843           | 5843      | 0.17023691  | 0.020470066 | 0.920470066 | 0.02365711  | 1.257975757 | 0.314222146 | 0.020597322  | 0.84020268  | 0.027634741  | 1.127271929    | XM       | 393251.3 |
| chrUn      | 55887585  | 55891850  | XM 624054       | 4266              | 4266         | 2669       | 2669           | 2669      | 0.179835873 | 0.003987802 | 0.955915865 | 0.011259676 | 1.411628794 | 0.249906332 | 0.006042926  | 0.339385471 | 0.016993958  | 1.163296636    | XM       | 624054.2 |
| chr14      | 6458920   | 6460222   | AmelG14 WGA411  | 2.515073.515073.m | 1445         | 1445       | 1445           | 1445      | 0.532152313 | 0.008249558 | 1.556176389 | 0.034747921 | 1.24070926  | 0.358752537 | 0.051052516  | 1.395110516 | 0.024049526  | 1.04049526     | -        | -        |
| chr12      | 6029300   | 6033762   | XM 625232       | 4463              | 4463         | 3936       | 3936           | 3936      | 0.3060946   | 0.036754818 | 1.635088225 | 0.025324966 | 1.126615667 | 0.330538618 | 0.041518085  | 1.529620002 | 0.028782476  | 1.060414113    | -        | -        |
| chr16      | 4626857   | 4631064   | AmelG16 WGA454  | 2.509238.509238.m | 4208         | 3665       | 3056           | 3056      | 0.222373806 | 0.008190008 | 0.75391474  | 0.014469014 | 1.246191605 | 0.24051147  | 0.009186352  | 0.668093728 | 0.016732283  | 1.216885004    | -        | -        |
| chrUn      | 107337506 | 107344249 | XM 395535       | 6744              | 6744         | 5351       | 5351           | 5351      | 0.230575326 | 0.018686045 | 1.406603805 | 0.015577104 | 1.172169837 | 0.275836292 | 0.022902196  | 1.204660914 | 0.019335461  | 1.014970788    | XM       | 395535.3 |
| chr10      | 3124688   | 3126200   | XM 623300       | 1513              | 1513         | 980        | 980            | 980       | 0.218109716 | 0.009259259 | 0.7850373   | 0.015873016 | 1.345778366 | 0.298979592 | 0.014388489  | 0.651149988 | 0.024665982  | 1.116757122    | XM       | 623300.2 |
| chr12      | 8170348   | 8176421   | AmelG12 WGA390  | 2.504044.504044.m | 6074         | 6074       | 4609           | 4609      | 0.224563714 | 0.013831747 | 1.105686465 | 0.016137    | 1.289965454 | 0.275330874 | 0.018320611  | 0.972377817 | 0.021155943  | 1.12264846     | -        | -        |
| chr14      | 5877888   | 5900292   | XM 393959       | 24405             | 24405        | 23367      | 23367          | 23367     | 0.400983405 | 0.05413047  | 1.347001334 | 0.032453696 | 0.80758899  | 0.365266887 | 0.056172072  | 1.361540376 | 0.033763229  | 0.818378197    | XM       | 393959.3 |
| chrUn      | 35018076  | 3502402   | XM 396275       | 1420              | 1420         | 1230       | 1230           | 1230      | 0.231041426 | 0.008249558 | 1.556176389 | 0.034747921 | 1.24070926  | 0.358752537 | 0.051052516  | 1.395110516 | 0.024049526  | 1.04049526     | -        | -        |
| chrUn      | 235508847 | 235513614 | XM 396275       | 4768              | 4767         | 3023       | 3023           | 3023      | 0.205580029 | 0.003777545 | 0.367827091 | 0.01762854  | 1.716526423 | 0.285147205 | 0.005322688  | 0.268137804 | 0.026280772  | 1.232393045    | XM       | 396275.2 |
| chrUn      | 8487694   | 8493960   | XM 395152       | 6267              | 6267         | 4418       | 4418           | 4418      | 0.251635551 | 0.020906479 | 1.232862241 | 0.018672199 | 1.087273208 | 0.322770484 | 0.029130633  | 1.118499899 | 0.026399636  | 1.013640534    | -        | -        |
| chr15      | 1202355   | 1206027   | AmelG15 WGA427  | 2.504724.504724.m | 3673         | 3673       | 3477           | 3477      | 0.327259297 | 0.042755991 | 1.602379166 | 0.031590414 | 1.18392346  | 0.339373023 | 0.045231922  | 1.574978768 | 0.03419764   | 1.16367858     | -        | -        |
| chr5       | 12885573  | 12888353  | XM 625185       | 2408              | 2408         | 2408       | 2408           | 2408      | 0.2556634   | 0.01942446  | 1.19585445  | 0.01870     |             |             |              |             |              |                |          |          |

| chromosome | start     | end       | ID              | length | valid length without Ns | non-repetitive nr length | qcContent   | cpaContent   | cpqo/E       | qpcContent  | qpcO/E      | nrGContent  | nrCpGContent | nrCpGGO/E   | nrGpCContent | nrGpCO/E     | RefSeqID      | version |
|------------|-----------|-----------|-----------------|--------|-------------------------|--------------------------|-------------|--------------|--------------|-------------|-------------|-------------|--------------|-------------|--------------|--------------|---------------|---------|
| chr11      | 527073    | 528868    | XM 393466       | 1796   | 1796                    | 1397                     | 0.243318486 | 0.01281337   | 0.876734394  | 0.015041783 | 1.029209941 | 0.294201861 | 0.016534867  | 0.77705633  | 0.019410496  | 0.912196561  | XM 393466.3   | -       |
| chr2       | 987837    | 9887366   | XM 394363       | 9000   | 9000                    | 7219                     | 0.283777778 | 0.013112568  | 0.655173422  | 0.025891766 | 1.293689892 | 0.340074803 | 0.012805404  | 0.556696023 | 0.032249096  | 1.123073717  | XM 394363.3   | -       |
| chrUn      | 25654972  | 25657864  | XM 395589       | 2893   | 2893                    | 1510                     | 0.221223643 | 0.0145223643 | 0.1187096664 | 0.018672199 | 1.252667139 | 0.358940397 | 0.020893783  | 0.870657642 | 0.035380507  | 1.0398687025 | XM 395589.3   | -       |
| chrUn      | 135592216 | 135594118 | AmelG10 WGA2827 | 203    | 203                     | 90                       | 0.408637874 | 0.031042128  | 0.743727773  | 0.05097561  | 1.460893841 | 0.404637874 | 0.031042128  | 0.743727773 | 0.060937561  | 1.460893841  | XM 395589.3   | -       |
| chr15      | 1564406   | 1566965   | XM 623532       | 2560   | 2560                    | 2535                     | 0.40703125  | 0.069558421  | 1.684254843  | 0.041031653 | 0.989327014 | 0.411045365 | 0.070272404  | 1.664881809 | 0.041452823  | 0.984216798  | XM 623532.2   | -       |
| chrUn      | 17448411  | 174483565 | XM 393143       | 753    | 753                     | 753                      | 0.227160494 | 0.007413509  | 1.567607345  | 0.04033295  | 1.093147208 | 0.479633071 | 0.012032086  | 0.937633071 | 0.012739679  | 0.698203325  | XM 393143.3   | -       |
| chrUn      | 152141742 | 152142612 | XM 623624       | 871    | 871                     | 643                      | 0.245694604 | 0.008045977  | 0.537845453  | 0.011494253 | 0.768350647 | 0.306376361 | 0.010954617  | 0.476866992 | 0.015649452  | 0.683814246  | XM 623624.2   | -       |
| chrUn      | 73934156  | 73936226  | XM 623534       | 2071   | 1509                    | 1024                     | 0.230616302 | 0.01061712   | 0.803004035  | 0.01562211  | 1.1543183   | 0.31640625  | 0.015779903  | 0.637471698 | 0.022682446  | 0.916365565  | XM 623534.2   | -       |
| chrUn      | 11116605  | 11121350  | XM 393367       | 4746   | 4407                    | 3698                     | 0.351581781 | 0.028058361  | 0.907984088  | 0.037934905 | 1.227594487 | 0.386425095 | 0.033360456  | 0.893711333 | 0.036615134  | 0.980920682  | XM 393367.2   | -       |
| chrUn      | 87472829  | 87482028  | XM 624310       | 9200   | 9200                    | 6531                     | 0.227121649 | 0.022163121  | 1.710883174  | 0.016068262 | 1.246153014 | 0.280202113 | 0.029832385  | 1.51991088  | 0.0210672    | 1.07393102   | XM 624310.2   | -       |
| chr10      | 1075425   | 1080342   | XM 391829       | 4918   | 4918                    | 3753                     | 0.300732005 | 0.030913158  | 1.380506848  | 0.026032133 | 1.162532083 | 0.371702638 | 0.040374332  | 1.17961356  | 0.03368984   | 0.984313301  | XM 391829.3   | -       |
| chrUn      | 60799914  | 60804409  | XM 623532       | 4496   | 4496                    | 3843                     | 0.271352313 | 0.02696329   | 1.450914354  | 0.022464641 | 1.209095295 | 0.297944314 | 0.030540329  | 1.379325376 | 0.02580788   | 1.15532366   | XM 623532.2   | -       |
| chr8       | 5985522   | 3989778   | XM 394733       | 3257   | 3257                    | 3257                     | 0.251151366 | 0.021191646  | 1.347079783  | 0.02598526  | 1.639923214 | 0.307317073 | 0.028186275  | 1.197133119 | 0.033088235  | 0.944232007  | XM 394733.3   | -       |
| chr2       | 2432008   | 2442141   | XM 395230       | 10134  | 10134                   | 8837                     | 0.267219262 | 0.02210599   | 1.247640325  | 0.021020428 | 1.186372274 | 0.297838633 | 0.024965956  | 1.13397429  | 0.02471584   | 1.097893289  | XM 395230.3   | -       |
| chr13      | 2888593   | 2891778   | XM 391968       | 3186   | 3186                    | 2963                     | 0.39296924  | 0.065306122  | 1.698531463  | 0.033281005 | 0.865597765 | 0.403644954 | 0.069012179  | 1.699151331 | 0.034844384  | 0.857904839  | XM 391968.3   | -       |
| chrUn      | 47684905  | 47688246  | AmelG10 WGA939  | 3342   | 3342                    | 2740                     | 0.248906933 | 0.009375     | 0.608616604  | 0.0175      | 1.136084327 | 0.281021898 | 0.010984987  | 0.559348416 | 0.020505309  | 1.044117043  | XM 47684905.3 | -       |
| chr5       | 6658052   | 6668815   | XM 396621       | 10764  | 10759                   | 9638                     | 0.316107445 | 0.031340091  | 1.257237343  | 0.028829164 | 1.156509129 | 0.3426022   | 0.034952668  | 1.195006136 | 0.032143972  | 1.098978857  | XM 396621.3   | -       |
| chr7       | 423275    | 427503    | XM 624505       | 4229   | 4229                    | 3795                     | 0.235753133 | 0.005203406  | 0.800721352  | 0.019157994 | 1.400089977 | 0.255335968 | 0.005813953  | 0.362545153 | 0.02140592   | 1.334825337  | XM 624505.2   | -       |
| chr1       | 5106726   | 5108610   | XM 394881       | 1885   | 1885                    | 1762                     | 0.271087533 | 0.00955414   | 0.520914678  | 0.022929994 | 1.215467582 | 0.285471056 | 0.010227273  | 0.502867203 | 0.023863636  | 1.173356806  | XM 394881.3   | -       |
| chr15      | 898342    | 907473    | XM 393180       | 9132   | 9132                    | 9132                     | 0.328734122 | 0.045011499  | 1.666430506  | 0.03256558  | 1.200428086 | 0.352040816 | 0.048864582  | 1.577562628 | 0.05319201   | 1.13615216   | XM 393180.3   | -       |
| chrUn      | 12949118  | 12952236  | XM 623162       | 3119   | 3119                    | 2712                     | 0.286950946 | 0.01866581   | 0.585140415  | 0.031751123 | 1.056459575 | 0.321902655 | 0.013678373  | 0.573761264 | 0.036229205  | 1.424102267  | XM 12949118.3 | -       |
| chr5       | 6022166   | 6022718   | AmelG5 WGA159   | 1553   | 1553                    | 1192                     | 0.233097231 | 0.010953608  | 0.876731922  | 0.01974227  | 1.509211152 | 0.27936214  | 0.01350211   | 0.710017084 | 0.025316456  | 1.331282032  | XM 6022166.3  | -       |
| chr5       | 1303951   | 13123474  | XM 393227       | 19524  | 19524                   | 16662                    | 0.462763778 | 0.081596066  | 1.524756809  | 0.056702351 | 1.059576766 | 0.49524859  | 0.079566657  | 1.509021538 | 0.057959675  | 1.099234299  | XM 393227.3   | -       |
| chr7       | 2020149   | 2026703   | XM 392444       | 6555   | 6555                    | 6357                     | 0.353318078 | 0.049893195  | 1.598911131  | 0.029756283 | 0.953479115 | 0.363693566 | 0.051496063  | 1.557433755 | 0.07008661   | 0.982744897  | XM 392444.3   | -       |
| chr1       | 10242997  | 10244669  | AmelG1 WGA26    | 1653   | 1653                    | 1003                     | 0.197217181 | 0.006585996  | 0.693237061  | 0.010895884 | 1.134387918 | 0.264207378 | 0.011055276  | 0.635526145 | 0.018090452  | 1.039951874  | XM 10242997.3 | -       |
| chr7       | 6067349   | 6067349   | XM 623735       | 2277   | 2277                    | 2277                     | 0.253946926 | 0.005070313  | 0.743727773  | 0.031922094 | 1.047637874 | 0.31640625  | 0.012805404  | 0.556696023 | 0.032249096  | 1.123073717  | XM 623735.2   | -       |
| chr8       | 7594036   | 7663003   | XM 625041       | 6868   | 6868                    | 56650                    | 0.325240116 | 0.042714222  | 1.618487419  | 0.026183144 | 0.992107288 | 0.355692883 | 0.048864582  | 1.577562628 | 0.05319201   | 1.13615216   | XM 625041.2   | -       |
| chr15      | 4266573   | 4305819   | XM 395040       | 39247  | 39247                   | 38353                    | 0.415878921 | 0.066376191  | 1.535122055  | 0.041864139 | 0.968217096 | 0.422313769 | 0.067915569  | 1.52386213  | 0.042789678  | 0.959734686  | XM 395040.3   | -       |
| chrUn      | 5511891   | 5525704   | XM 623434       | 13814  | 13814                   | 13455                    | 0.393079485 | 0.055599797  | 1.442282251  | 0.034571717 | 1.086011103 | 0.395540691 | 0.056898475  | 1.457206328 | 0.039315954  | 0.88609262   | XM 5511891.3  | -       |
| chrUn      | 13648383  | 13057032  | XM 396098       | 8650   | 8650                    | 7288                     | 0.262196532 | 0.012949474  | 0.754175009  | 0.01896173  | 1.104327691 | 0.299670692 | 0.015395189  | 0.686362062 | 0.02185567   | 0.974388999  | XM 396098.3   | -       |
| chr15      | 1694084   | 1700185   | XM 397181       | 6102   | 4850                    | 4190                     | 0.299175258 | 0.019389439  | 0.8732       | 0.027640264 | 1.244774468 | 0.363767685 | 0.022498803  | 0.802567266 | 0.032072762  | 1.144084482  | XM 397181.3   | -       |
| chrUn      | 60086363  | 60088395  | XM 625029       | 2033   | 2033                    | 1235                     | 0.210034432 | 0.00689764   | 0.625131869  | 0.013779528 | 1.250263738 | 0.306882591 | 0.010603589  | 0.45037201  | 0.01207178   | 0.90744021   | XM 625029.2   | -       |
| chrUn      | 11691567  | 11693591  | XM 395028       | 2025   | 2025                    | 1937                     | 0.537283951 | 0.096343874  | 1.335097703  | 0.063735178 | 0.88321848  | 0.305851833 | 0.099224806  | 1.308515623 | 0.065633075  | 0.865528563  | XM 395028.3   | -       |
| chrUn      | 22804940  | 22804940  | AmelG1 WGA608   | 716    | 716                     | 716                      | 0.252903226 | 0.00125434   | 0.72834641   | 0.012720984 | 1.047698963 | 0.296857464 | 0.016539523  | 0.732126126 | 0.014592533  | 0.71958647   | XM 22804940.3 | -       |
| chr5       | 2823936   | 2828937   | XM 392588       | 5002   | 5002                    | 3298                     | 0.230307877 | 0.013197361  | 1.004401548  | 0.015369621 | 1.171801806 | 0.303820497 | 0.018574909  | 0.811466329 | 0.023142509  | 1.011007229  | XM 392588.3   | -       |
| chr15      | 4246629   | 4249745   | XM 623248       | 3117   | 3117                    | 2358                     | 0.226820661 | 0.014762516  | 1.149981677  | 0.018613607 | 1.44976898  | 0.27947131  | 0.019599489  | 1.005187259 | 0.032008095  | 1.180002435  | XM 4246629.3  | -       |
| chrUn      | 13782318  | 13783902  | XM 625282       | 1585   | 1585                    | 966                      | 0.19873817  | 0.011994949  | 1.218323441  | 0.01572828  | 1.603057159 | 0.273291925 | 0.018730489  | 1.018084125 | 0.023933403  | 1.300885271  | XM 625282.2   | -       |
| chr8       | 6799104   | 6801388   | AmelG8 WGA270   | 2285   | 2285                    | 2285                     | 0.38512035  | 0.042469352  | 1.145367706  | 0.031961471 | 0.861977758 | 0.390399531 | 0.043168669  | 1.132993834 | 0.032487761  | 0.852656463  | XM 6799104.3  | -       |
| chr2       | 6153102   | 6154666   | AmelG2 WGA75    | 1565   | 1565                    | 1532                     | 0.315482481 | 0.095907928  | 1.341213292  | 0.051790281 | 0.724255178 | 0.542428198 | 0.098039216  | 1.332849038 | 0.052941176  | 0.71973848   | XM 6153102.3  | -       |
| chrUn      | 15995425  | 15999548  | AmelG1 WGA542   | 4124   | 4124                    | 3669                     | 0.315953583 | 0.034926025  | 1.400580121  | 0.020858598 | 0.836457572 | 0.346143363 | 0.039606366  | 1.305314963 | 0.0322177    | 0.779788516  | XM 15995425.3 | -       |
| chrUn      | 18571146  | 18571146  | AmelG1 WGA526   | 229    | 229                     | 166                      | 0.244100805 | 0.003501365  | 0.743727773  | 0.023505196 | 1.047637874 | 0.31640625  | 0.012805404  | 0.556696023 | 0.032249096  | 1.123073717  | XM 18571146.3 | -       |
| chrUn      | 14332041  | 14332041  | XM 624143       | 3925   | 3925                    | 2721                     | 0.223949045 | 0.011977572  | 0.993774233  | 0.026042202 | 0.712647471 | 0.297317163 | 0.016653586  | 0.787214609 | 0.02883549   | 0.934349322  | XM 624143.2   | -       |
| chr5       | 8850531   | 8852464   | XM 623257       | 1934   | 1934                    | 1575                     | 0.25336091  | 0.005690636  | 0.53953655   | 0.024831868 | 1.553177673 | 0.29015873  | 0.006997455  | 0.333449804 | 0.029898219  | 1.42474007   | XM 8850531.3  | -       |
| chr1       | 22511586  | 2251611   | AmelG1 WGA58    | 4532   | 4532                    | 2425                     | 0.195278023 | 0.008828073  | 0.92607541   | 0.011697197 | 1.202949918 | 0.293608247 | 0.015813566  | 0.734129514 | 0.019142738  | 0.886883096  | XM 22511586.3 | -       |
| chr11      | 10725080  | 10726076  | XM 393778       | 997    | 997                     | 997                      | 0.289869609 | 0.010040161  | 0.592592012  | 0.029116466 | 1.409194134 | 0.309267241 | 0.017099136  | 0.458446377 | 0.031317495  | 1.322949492  | XM 393778.1   | -       |
| chr9       | 3256543   | 3258430   | AmelG9 WGA286   | 1888   | 1888                    | 1888                     | 0.58103336  | 0.091149974  | 1.0806136    | 0.07154213  | 0.848156023 | 0.581038136 | 0.091149974  | 1.0806136   | 0.07154213   | 0.848156023  | XM 3256543.3  | -       |
| chr4       | 575963    | 586061    | AmelG4 WGA127   | 10099  | 9934                    | 9023                     | 0.414034144 | 0.0557676    | 1.301398541  | 0.045377439 | 1.058932653 | 0.420148509 | 0.056813138  | 1.28742519  | 0.046049711  | 1.03518464   | XM 575963.3   | -       |
| chr1       | 6186156   | 6189032   | AmelG1 WGA16    | 2877   | 2877                    | 2221                     | 0.226277372 | 0.01077886   | 0.853401542  | 0.015994437 | 1.266337772 | 0.270148582 | 0.014        |             |              |              |               |         |

| chromosome | start     | end       | ID              | length | valid length | without Ns | non-repetitive | nr length | qcContent   | cpqContent  | cpqO/E      | apcContent  | apcO/E      | nrGContent  | nrCpGContent | nrCpGGO/E   | nrGpCCContent | nrGpCO/E    | RefSeqID    | version |
|------------|-----------|-----------|-----------------|--------|--------------|------------|----------------|-----------|-------------|-------------|-------------|-------------|-------------|-------------|--------------|-------------|---------------|-------------|-------------|---------|
| chrUn      | 16403367  | 16409161  | XM 392655       | 5795   | 5534         |            | 3968           |           | 0.199132635 | 0.00813449  | 0.820648074 | 0.012472885 | 1.258327047 | 0.245715726 | 0.011139241  | 0.738268693 | 0.016708861   | 1.107403474 | XM 392655.3 |         |
| chrUn      | 307791004 | 307791670 | AmelGUn WGA7310 | 667    | 667          |            | 667            |           | 0.467766117 | 0.037537538 | 0.689656723 | 0.073573574 | 1.351727176 | 0.073573574 | 0.037537538  | 0.689656723 | 0.073573574   | 1.351727176 | -           |         |
| chrUn      | 238191273 | 238192356 | AmelGUn WGA5496 | 1084   | 1084         |            | 1000           |           | 0.325645617 | 0.022160665 | 0.848485571 | 0.039704524 | 1.520203314 | 0.346       | 0.024048096  | 0.85521439  | 0.043086172   | 1.461142578 | -           |         |
| chr6       | 2519174   | 2553139   | XM 623935       | 1165   | 1165         |            | 1079           |           | 0.410806175 | 0.06904206  | 1.446509546 | 0.045251931 | 1.087515908 | 0.06598513  | 1.362006132  | 0.06598513  | 1.362006132   | 1.03581988  | -           |         |
| chr13      | 561633    | 564955    | AmelG13 WGA391  | 2963   | 2963         |            | 2844           |           | 0.334120823 | 0.042538825 | 1.52458572  | 0.032410533 | 1.16158912  | 0.342123769 | 0.044366197  | 1.516163204 | 0.033802817   | 1.155172514 | -           |         |
| chr8       | 2994430   | 3005719   | XM 623908       | 11290  | 11190        |            | 10636          |           | 0.384539768 | 0.055153303 | 1.49505554  | 0.03967999  | 0.920785908 | 0.041748778 | 0.058086899  | 1.444262626 | 0.058086863   | 0.886151268 | XM 623908.2 |         |
| chrUn      | 302114742 | 302117160 | XM 624346       | 2419   | 2419         |            | 1763           |           | 0.229847044 | 0.006203474 | 0.486054473 | 0.017369727 | 1.360952524 | 0.293817357 | 0.008547009  | 0.410722743 | 0.023361823   | 1.122642164 | XM 624346.2 |         |
| chr6       | 4289166   | 4298334   | XM 392810       | 9169   | 9168         |            | 7346           |           | 0.271378709 | 0.027929304 | 0.518357342 | 0.021492472 | 1.168423409 | 0.316634903 | 0.033337888  | 1.331435985 | 0.025959381   | 1.036773923 | XM 392810.3 |         |
| chr7       | 4828283   | 4832862   | XM 624635       | 4580   | 4580         |            | 3670           |           | 0.276855895 | 0.016815899 | 0.896427416 | 0.023149159 | 1.234042936 | 0.328882834 | 0.020782062  | 0.787028792 | 0.028712059   | 1.08734241  | XM 624635.2 |         |
| chr1       | 6612631   | 6613444   | XM 397252       | 1714   | 1714         |            | 1158           |           | 0.223453909 | 0.007005254 | 0.604938478 | 0.020115762 | 1.814815433 | 0.296200345 | 0.008688097  | 0.432105397 | 0.03127715    | 1.555525578 | XM 397252.3 |         |
| chr5       | 7627239   | 76811704  | XM 396811       | 28966  | 28916        |            | 27842          |           | 0.385876331 | 0.060351387 | 1.621919025 | 0.036729612 | 0.987093412 | 0.393685798 | 0.062484271  | 1.613490147 | 0.037713464   | 0.973849222 | XM 396811.3 |         |
| chrUn      | 222934695 | 222935604 | XM 395900       | 910    | 910          |            | 779            |           | 0.249450549 | 0.00640656  | 0.44009715  | 0.03080308  | 2.053786699 | 0.279845956 | 0.007731959  | 0.407297707 | 0.036082474   | 1.900722634 | XM 395900.2 |         |
| chrUn      | 60808614  | 60815780  | XM 624108       | 7167   | 7117         |            | 5572           |           | 0.173668681 | 0.005200281 | 0.705546054 | 0.009697822 | 1.315949471 | 0.265957447 | 0.008472183  | 0.49820322  | 0.01644366    | 0.996406439 | XM 624108.2 |         |
| chr1       | 22578736  | 22587197  | AmelG1 WGA58    | 8462   | 8412         |            | 8172           |           | 0.389800285 | 0.058858502 | 1.551731163 | 0.038763377 | 1.0219482   | 0.399657367 | 0.060502143  | 1.517406624 | 0.039926516   | 1.001365505 | -           |         |
| chr10      | 3018255   | 3019272   | AmelG10 WGA316  | 1018   | 1018         |            | 774            |           | 0.206286837 | 0.002949853 | 0.284743196 | 0.013765978 | 1.32880158  | 0.260981912 | 0.003896104  | 0.233967756 | 0.018181818   | 1.09184953  | -           |         |
| chr3       | 7800015   | 7802475   | XM 394423       | 2461   | 2461         |            | 2461           |           | 0.44534742  | 0.064227642 | 1.300646532 | 0.049593496 | 1.004296689 | 0.34534742  | 0.064227642  | 1.300646532 | 0.049593496   | 1.004296689 | XM 394423.3 |         |
| chr4       | 2948435   | 2962108   | XM 624674       | 12574  | 12464        |            | 10855          |           | 0.279284339 | 0.029850746 | 1.538185404 | 0.01974001  | 1.017187122 | 0.304467987 | 0.034202256  | 1.48244202  | 0.022674439   | 0.981617013 | -           |         |
| chrUn      | 78000474  | 78015283  | XM 392772       | 14810  | 14760        |            | 10004          |           | 0.219783198 | 0.00982518  | 0.814314207 | 0.015042689 | 1.246743131 | 0.286785286 | 0.01365599   | 0.66479473  | 0.021488510   | 1.04607048  | XM 392772.3 |         |
| chrUn      | 22190498  | 22191831  | AmelGUn WGA600  | 1334   | 1334         |            | 1334           |           | 0.3005997   | 0.002250563 | 0.106959787 | 0.030757689 | 1.461783751 | 0.3005997   | 0.002250563  | 0.106959787 | 0.030757689   | 1.461783751 | -           |         |
| chrUn      | 238960675 | 238961588 | AmelGUn WGA5516 | 914    | 914          |            | 762            |           | 0.343544858 | 0.021958085 | 0.814484772 | 0.031763417 | 1.08090072  | 0.397637795 | 0.026315789  | 0.666962255 | 0.028157895   | 0.96709527  | -           |         |
| chr11      | 5469658   | 5471826   | AmelG11 WGA355  | 2169   | 1892         |            | 1151           |           | 0.196617336 | 0.005209105 | 0.550582011 | 0.013227513 | 1.376455026 | 0.267593397 | 0.007860262  | 0.449100055 | 0.020960699   | 1.87600146  | -           |         |
| chrUn      | 255205878 | 255206936 | AmelGUn WGA5937 | 1059   | 1059         |            | 1059           |           | 0.35694051  | 0.020793951 | 0.673662274 | 0.027410208 | 0.887619179 | 0.305789551 | 0.020793951  | 0.673662274 | 0.027410208   | 0.887619179 | -           |         |
| chr11      | 895205    | 902194    | XM 625138       | 6990   | 6990         |            | 6721           |           | 0.361516452 | 0.042924596 | 1.315160777 | 0.031048791 | 0.951299629 | 0.373605118 | 0.044689409  | 1.282214334 | 0.032325339   | 0.927468368 | -           |         |
| chr13      | 6366851   | 6368524   | AmelG13 WGA400  | 1674   | 1674         |            | 1643           |           | 0.391875747 | 0.054991034 | 1.459847621 | 0.034686261 | 0.920338717 | 0.392574559 | 0.056063376  | 1.477268261 | 0.035344302   | 0.931321295 | -           |         |
| chr6       | 1729319   | 1730066   | AmelG6 WGA184   | 748    | 748          |            | 748            |           | 0.521390374 | 0.061579652 | 0.93806152  | 0.038821954 | 0.591386611 | 0.521390374 | 0.061579652  | 0.93806152  | 0.038821954   | 0.591386611 | -           |         |
| chrUn      | 43555139  | 4358477   | XM 39558        | 3329   | 3329         |            | 2566           |           | 0.20696906  | 0.005408654 | 0.51249171  | 0.012620191 | 1.95813972  | 0.006551017 | 0.418048487  | 0.016040689 | 1.098234491   | 1.98234491  | XM 395585.3 |         |
| chr6       | 56045551  | 56049978  | AmelGUn WGA1076 | 4428   | 4428         |            | 3209           |           | 0.230803975 | 0.017393629 | 0.325548018 | 0.016263836 | 2.239473471 | 0.291056404 | 0.024122807  | 1.501672557 | 0.021616541   | 0.940222097 | -           |         |
| chrUn      | 74776344  | 74778488  | AmelGUn WGA1418 | 2145   | 2145         |            | 1232           |           | 0.180885781 | 0.003264925 | 0.4117837   | 0.014925373 | 1.882456549 | 0.26461039  | 0.0040905969 | 0.287583416 | 0.026165168   | 1.533778217 | -           |         |
| chr8       | 4812739   | 4813779   | XM 397054       | 1041   | 1041         |            | 726            |           | 0.23439001  | 0.002884615 | 0.210718091 | 0.020192308 | 1.075026639 | 0.305781124 | 0.004166667  | 0.027777778 | 0.193041069   | 1.397054.3  | -           |         |
| chr9       | 4257870   | 4263699   | XM 624285       | 5830   | 5830         |            | 5383           |           | 0.270689554 | 0.022473838 | 1.228378491 | 0.022473838 | 1.28378491  | 0.289429686 | 0.024381165  | 1.165131165 | 0.024381165   | 1.165131165 | -           |         |
| chrUn      | 304842395 | 304843904 | AmelGUn WGA7232 | 1510   | 1510         |            | 1399           |           | 0.294039735 | 0.019218025 | 0.904548009 | 0.035122598 | 1.625319465 | 0.316654753 | 0.02078853   | 0.84427566  | 0.037992832   | 1.542986551 | -           |         |
| chrUn      | 211966579 | 211969248 | AmelGUn WGA4811 | 2670   | 2670         |            | 1952           |           | 0.229965247 | 0.015736231 | 1.191296574 | 0.021730985 | 1.64512384  | 0.287397541 | 0.021638331  | 1.048644421 | 0.029881504   | 1.448127997 | -           |         |
| chrUn      | 159319747 | 159321215 | AmelGUn WGA3450 | 1469   | 1469         |            | 1404           |           | 0.361470388 | 0.019754768 | 0.604938552 | 0.035422343 | 1.084717403 | 0.376780627 | 0.0206995    | 0.583402721 | 0.037116345   | 1.04610143  | -           |         |
| chr1       | 9316547   | 9326080   | AmelG1 WGA423   | 9534   | 9534         |            | 9007           |           | 0.312250892 | 0.040051921 | 1.679804342 | 0.018671982 | 0.766767926 | 0.263626648 | 0.007153076  | 0.411086605 | 0.019464631   | 1.047866015 | -           |         |
| chr11      | 2360984   | 2362604   | XM 623556       | 1621   | 1621         |            | 1309           |           | 0.270820481 | 0.027160494 | 1.523395389 | 0.019135802 | 1.073301296 | 0.314744079 | 0.033716475  | 1.387029181 | 0.023754789   | 0.977225105 | XM 623556.2 |         |
| chr9       | 3806490   | 3814607   | AmelG9 WGA287   | 8118   | 8118         |            | 7777           |           | 0.368070953 | 0.046199335 | 1.364723163 | 0.0347419   | 1.026271819 | 0.375594702 | 0.047098186  | 1.336740058 | 0.035259297   | 0.90728896  | -           |         |
| chrUn      | 15137770  | 15148479  | XM 393018       | 10710  | 10300        |            | 6276           |           | 0.203009709 | 0.01495436  | 1.453099037 | 0.012720917 | 1.236077752 | 0.2791587   | 0.022781967  | 1.170473665 | 0.019894112   | 1.022103764 | XM 393018.3 |         |
| chr11      | 5631254   | 5860539   | XM 396560       | 229286 | 227376       |            | 218104         |           | 0.386087362 | 0.059022738 | 1.584887357 | 0.032748384 | 0.879364475 | 0.393642482 | 0.061164915  | 1.580380015 | 0.034038647   | 0.879491085 | XM 396560.3 |         |
| chrUn      | 19961201  | 19970560  | XM 392746       | 9360   | 9360         |            | 4890           |           | 0.181837607 | 0.010364355 | 1.257179858 | 0.011967091 | 1.451589115 | 0.270552147 | 0.01814059   | 0.994505869 | 0.021645022   | 1.186626321 | XM 392746.2 |         |
| chrUn      | 21485202  | 21487763  | XM 623946       | 2562   | 2191         |            | 1094           |           | 0.167503423 | 0.007309274 | 1.056550113 | 0.007766103 | 1.122584495 | 0.268738574 | 0.013901761  | 0.783044423 | 0.021755329   | 0.887450346 | XM 623946.2 |         |
| chr5       | 11417856  | 11535659  | XM 001011574.1  | 5804   | 4502         |            | 3675           |           | 0.435806308 | 0.059777778 | 1.263078255 | 0.045555556 | 0.878050683 | 0.467755102 | 0.068448323  | 1.253161761 | 0.04717529    | 0.863733007 | -           |         |
| chr11      | 5129333   | 5130485   | AmelG11 WGA355  | 1153   | 1153         |            | 1153           |           | 0.392020815 | 0.061631944 | 1.604945283 | 0.034722222 | 0.904194526 | 0.392020815 | 0.061631944  | 1.604945283 | 0.034722222   | 0.904194526 | -           |         |
| chr3       | 341370    | 342422    | AmelG3 WGA98    | 1053   | 1053         |            | 641            |           | 0.214624881 | 0.007604563 | 0.669206953 | 0.007604563 | 0.669206953 | 0.31825273  | 0.012618297  | 0.503165596 | 0.012618297   | 0.503165596 | -           |         |
| chr14      | 273714    | 338798    | XM 397010       | 65085  | 65085        |            | 59330          |           | 0.488714758 | 0.092603405 | 1.551824707 | 0.05142585  | 0.861781532 | 0.500202259 | 0.098019016  | 1.567608436 | 0.054987925   | 0.879416449 | XM 397010.3 |         |
| chr9       | 4343871   | 4366801   | AmelG9 WGA288   | 22931  | 22931        |            | 22110          |           | 0.434041254 | 0.071609246 | 1.520436675 | 0.039380724 | 0.836147575 | 0.438263229 | 0.073262395  | 1.525981295 | 0.040751641   | 0.848815306 | -           |         |
| chr4       | 5437609   | 5445212   | AmelG4 WGA138   | 7604   | 6237         |            | 4978           |           | 0.248997916 | 0.022774659 | 1.47117897  | 0.016785036 | 1.212168588 | 0.292286059 | 0.028438887  | 1.333184594 | 0.023396531   | 1.096804347 | -           |         |
| chr16      | 4171265   | 4174821   | XM 623353       | 3557   | 3557         |            | 3205           |           | 0.18841395  | 0.018841395 | 0.75896877  | 0.036839145 | 1.483953863 | 0.343837754 | 0.020950594  | 0.711713319 | 0.040963102   | 1.391558878 | XM 623353.2 |         |
| chrUn      | 167845376 | 167849389 | XM 396933       | 4014   | 4014         |            | 2238           |           | 0.200298954 | 0.012459507 | 1.255291687 | 0.011213556 | 1.29762518  | 0.287310098 | 0.018468468  | 0.90201     |               |             |             |         |
