# Supplementary material
Source: PubMed Central journal article supplement (PMC2708677)
Supplement: 0900301106_SD2_PDF.pdf [file 0900301106_SD2_PDF.pdf]

Elanko et al. 2009 supplementary material - CoG O/E data for gene bodies (all exons, including CDS and UTRs, and introns) using genome build 2 linked to various NCBI identifiers and gene expression data from Grozinger et al. 2007 (PMID: 17927707)

[illegible]



[illegible]

[illegible]











[illegible]

| GB ID   | nuACC     | Entrez  | ncuGI     | arotACC     | arotGI    | Ureoe | CasteSio       | Queen BAGEL3 | Stellar W BAGEL | Reo W BAGEL | ncuContest  | ccoGI       | arotContest | arotCOE     | ncuContest  | ncuGOE      | ncuGOContest | ncuGOE      | class | O/SW        | loao20/SW   | AbSLao20/SW | RefSLao20/SW | version |
|---------|-----------|---------|-----------|-------------|-----------|-------|----------------|--------------|-----------------|-------------|-------------|-------------|-------------|-------------|-------------|-------------|--------------|-------------|-------|-------------|-------------|-------------|--------------|---------|
| GB43461 | XM 624038 | 551648  | 110761028 | XP 624041.2 | 110761029 | SW    | Caste-specific | 0.290549303  | 2.069193343     | 0.395913954 | 0.367042216 | 0.601173057 | 0.302574088 | 0.907073372 | 0.397336293 | 0.421416881 | 0.547456401  | 0.035317019 | 1     | 0.40366638  | 2.832728017 | 2.832728017 |              |         |
| GB44696 | XM 624468 | 5655128 | 110761126 | XP 624471.1 | 110761127 | SW    | Caste-specific | 0.18625128   | 0.000000000     | 0.18625128  | 0.000000000 | 0.18625128  | 0.000000000 | 0.18625128  | 0.000000000 | 0.18625128  | 0.000000000  | 0.18625128  | 1     | 0.00000000  | 2.832728017 | 2.832728017 | 624468.1     |         |
| GB13112 | XM 394353 | 410877  | 110751025 | XP 394352.3 | 66504684  | NS    | Caste-specific | 0.980139114  | 0.994027686     | 0.980139114 | 0.994027686 | 0.980139114 | 0.994027686 | 0.980139114 | 0.994027686 | 0.980139114 | 0.994027686  | 0.980139114 | 1     | 0.00299505  | 0.00299505  | XM 394353.0 |              |         |
| GB10390 | XM 393294 | 409802  | 110758023 | XP 393294.1 | 48128110  | O     | Caste-specific | 0.134640184  | 0.920999974     | 0.134640184 | 0.920999974 | 0.134640184 | 0.920999974 | 0.134640184 | 0.920999974 | 0.134640184 | 0.920999974  | 0.134640184 | 1     | 0.30067125  | 0.30067125  | XM 393294.0 |              |         |
| GB10865 | XM 393631 | 410148  | 110763430 | XP 393631.2 | 66564316  | NS    | Caste-specific | 0.196118233  | 0.831295962     | 0.196118233 | 0.831295962 | 0.196118233 | 0.831295962 | 0.196118233 | 0.831295962 | 0.196118233 | 0.831295962  | 0.196118233 | 1     | 0.52382906  | 0.52382906  | XM 393631.0 |              |         |
| GB13353 | XM 392097 | 410242  | 110761436 | XP 392097.3 | 110761437 | NS    | Caste-specific | 0.927238643  | 0.927238643     | 0.927238643 | 0.927238643 | 0.927238643 | 0.927238643 | 0.927238643 | 0.927238643 | 0.927238643 | 0.927238643  | 0.927238643 | 1     | 0.03561857  | 0.03561857  | XM 392097.0 |              |         |
| GB11128 | XM 392385 | 408855  | 110756962 | XP 392385.3 | 110756963 | NS    | Caste-specific | 0.919264098  | 0.102015653     | 0.919264098 | 0.102015653 | 0.919264098 | 0.102015653 | 0.919264098 | 0.102015653 | 0.919264098 | 0.102015653  | 0.919264098 | 1     | 0.150182708 | 0.150182708 | XM 392385.0 |              |         |
| GB17074 | XM 392918 | 409403  | 110759187 | XP 392918.2 | 66549197  | NS    | Caste-specific | 0.151294124  | 0.81901347      | 0.151294124 | 0.81901347  | 0.151294124 | 0.81901347  | 0.151294124 | 0.81901347  | 0.151294124 | 0.81901347   | 0.151294124 | 1     | 0.32509837  | 0.32509837  | XM 392918.0 |              |         |
| GB13621 | XM 623633 | 551241  | 110749116 | XP 623632.6 | 66499523  | O     | Caste-specific | 0.191140539  | 0.90571187      | 0.191140539 | 0.90571187  | 0.191140539 | 0.90571187  | 0.191140539 | 0.90571187  | 0.191140539 | 0.90571187   | 0.191140539 | 1     | 0.474451619 | 0.474451619 | XM 623633.0 |              |         |
| GB14108 | XM 623195 | 550896  | 110751005 | XP 623198.1 | 66504642  | NS    | Caste-specific | 0.94174254   | 0.96284759      | 0.94174254  | 0.96284759  | 0.94174254  | 0.96284759  | 0.94174254  | 0.96284759  | 0.94174254  | 0.96284759   | 0.94174254  | 1     | 0.183594384 | 0.183594384 | XM 623195.0 |              |         |
| GB12825 | XM 392839 | 409322  | 110751168 | XP 392839.3 | 110751169 | NS    | Caste-specific | 0.989365349  | 0.13018405      | 0.989365349 | 0.13018405  | 0.989365349 | 0.13018405  | 0.989365349 | 0.13018405  | 0.989365349 | 0.13018405   | 0.989365349 | 1     | 0.05958746  | 0.05958746  | XM 392839.0 |              |         |
| GB11930 | XM 625174 | 552799  | 110761250 | XP 625177.2 | 110761251 | NS    | Caste-specific | 0.792594008  | 0.107660878     | 0.792594008 | 0.107660878 | 0.792594008 | 0.107660878 | 0.792594008 | 0.107660878 | 0.792594008 | 0.107660878  | 0.792594008 | 1     | 0.442311888 | 0.442311888 | XM 625174.0 |              |         |
| GB13307 | XM 397241 | 413802  | 110763955 | XP 397241.3 | 110763956 | SW    | Caste-specific | 0.838094714  | 0.195872989     | 0.838094714 | 0.195872989 | 0.838094714 | 0.195872989 | 0.838094714 | 0.195872989 | 0.838094714 | 0.195872989  | 0.838094714 | 1     | 0.38677434  | 0.38677434  | XM 397241.0 |              |         |
| GB19575 | XM 392665 | 409139  | 110767279 | XP 392665.3 | 110767280 | NS    | Caste-specific | 0.101680793  | 0.95185088      | 0.101680793 | 0.95185088  | 0.101680793 | 0.95185088  | 0.101680793 | 0.95185088  | 0.101680793 | 0.95185088   | 0.101680793 | 1     | 0.103103125 | 0.103103125 | XM 392665.0 |              |         |
| GB13519 | XM 393502 | 410015  | 110759266 | XP 393502.2 | 66518227  | O     | Caste-specific | 0.105394583  | 0.989296919     | 0.105394583 | 0.989296919 | 0.105394583 | 0.989296919 | 0.105394583 | 0.989296919 | 0.105394583 | 0.989296919  | 0.105394583 | 1     | 0.12162057  | 0.12162057  | XM 393502.0 |              |         |
| GB14508 | XM 395793 | 412332  | 110765319 | XP 395793.2 | 66561865  | NS    | Caste-specific | 0.100422648  | 0.988836041     | 0.100422648 | 0.988836041 | 0.100422648 | 0.988836041 | 0.100422648 | 0.988836041 | 0.100422648 | 0.988836041  | 0.100422648 | 1     | 0.019687683 | 0.019687683 | XM 395793.0 |              |         |
| GB14772 | XM 396908 | 413464  | 110759524 | XP 396908.2 | 66518218  | SW    | Caste-specific | 0.81265128   | 0.9369082       | 0.81265128  | 0.9369082   | 0.81265128  | 0.9369082   | 0.81265128  | 0.9369082   | 0.81265128  | 0.9369082    | 0.81265128  | 1     | 0.78096532  | 0.78096532  | XM 396908.0 |              |         |
| GB14401 | XM 392143 | 408601  | 110749128 | XP 392143.1 | 48094550  | O     | Caste-specific | 0.14807285   | 0.95674851      | 0.14807285  | 0.95674851  | 0.14807285  | 0.95674851  | 0.14807285  | 0.95674851  | 0.14807285  | 0.95674851   | 0.14807285  | 1     | 0.121864185 | 0.121864185 | XM 392143.0 |              |         |
| GB18186 | XM 623645 | 551254  | 110750897 | XP 623647.8 | 66504945  | NS    | Caste-specific | 0.882329585  | 0.18826295      | 0.882329585 | 0.18826295  | 0.882329585 | 0.18826295  | 0.882329585 | 0.18826295  | 0.882329585 | 0.18826295   | 0.882329585 | 1     | 0.31572818  | 0.31572818  | XM 623645.0 |              |         |
| GB15837 | XM 392297 | 408763  | 110754974 | XP 392297.3 | 110754975 | NS    | Caste-specific | 0.93519993   | 0.10010758      | 0.93519993  | 0.10010758  | 0.93519993  | 0.10010758  | 0.93519993  | 0.10010758  | 0.93519993  | 0.10010758   | 0.93519993  | 1     | 0.09823902  | 0.09823902  | XM 392297.0 |              |         |
| GB14791 | XM 392639 | 409114  | 110749881 | XP 392639.1 | 48010996  | NS    | Caste-specific | 0.10622422   | 0.975810897     | 0.10622422  | 0.975810897 | 0.10622422  | 0.975810897 | 0.10622422  | 0.975810897 | 0.10622422  | 0.975810897  | 0.10622422  | 1     | 0.13040758  | 0.13040758  | XM 392639.0 |              |         |
| GB10007 | XM 625246 | 551409  | 110764692 | XP 625249.2 | 110764693 | SW    | Caste-specific | 0.86721446   | 0.102736409     | 0.86721446  | 0.102736409 | 0.86721446  | 0.102736409 | 0.86721446  | 0.102736409 | 0.86721446  | 0.102736409  | 0.86721446  | 1     | 0.244035258 | 0.244035258 | XM 625246.0 |              |         |
| GB10118 | XM 391857 | 408306  | 66518335  | XP 391857.2 | 66518336  | NS    | Caste-specific | 0.996037054  | 0.073364033     | 0.996037054 | 0.073364033 | 0.996037054 | 0.073364033 | 0.996037054 | 0.073364033 | 0.996037054 | 0.073364033  | 0.996037054 | 1     | 0.02871527  | 0.02871527  | XM 391857.0 |              |         |
| GB16864 | XM 393806 | 410325  | 110760940 | XP 393806.2 | 66519936  | NS    | Caste-specific | 0.9558484    | 0.181361628     | 0.9558484   | 0.181361628 | 0.9558484   | 0.181361628 | 0.9558484   | 0.181361628 | 0.9558484   | 0.181361628  | 0.9558484   | 1     | 0.039287553 | 0.039287553 | XM 393806.0 |              |         |
| GB12749 | XM 393447 | 409595  | 110760694 | XP 393447.1 | 48139240  | O     | Caste-specific | 0.106290384  | 0.923963928     | 0.106290384 | 0.923963928 | 0.106290384 | 0.923963928 | 0.106290384 | 0.923963928 | 0.106290384 | 0.923963928  | 0.106290384 | 1     | 0.202097958 | 0.202097958 | XM 393447.0 |              |         |
| GB14831 | XM 391876 | 408323  | 110761374 | XP 391876.3 | 48097932  | NS    | Caste-specific | 0.106782987  | 0.985815726     | 0.106782987 | 0.985815726 | 0.106782987 | 0.985815726 | 0.106782987 | 0.985815726 | 0.106782987 | 0.985815726  | 0.106782987 | 1     | 0.11345999  | 0.11345999  | XM 391876.0 |              |         |
| GB18578 | XM 392065 | 408520  | 110763565 | XP 392065.2 | 66525165  | NS    | Caste-specific | 0.116902263  | 0.928211078     | 0.116902263 | 0.928211078 | 0.116902263 | 0.928211078 | 0.116902263 | 0.928211078 | 0.116902263 | 0.928211078  | 0.116902263 | 1     | 0.129954672 | 0.129954672 | XM 392065.0 |              |         |
| GB12344 | XM 392244 | 408708  | 110750585 | XP 392244.1 | 48095134  | NS    | Caste-specific | 0.985765546  | 0.091711707     | 0.985765546 | 0.091711707 | 0.985765546 | 0.091711707 | 0.985765546 | 0.091711707 | 0.985765546 | 0.091711707  | 0.985765546 | 1     | 0.016510582 | 0.016510582 | XM 392244.0 |              |         |
| GB14805 | XM 624805 | 550852  | 110761616 | XP 624805.2 | 66504684  | NS    | Caste-specific | 0.94318182   | 0.904550001     | 0.94318182  | 0.904550001 | 0.94318182  | 0.904550001 | 0.94318182  | 0.904550001 | 0.94318182  | 0.904550001  | 0.94318182  | 1     | 0.043450001 | 0.043450001 | XM 624805.0 |              |         |
| GB17282 | XM 392689 | 409165  | 110773267 | XP 392689.2 | 66545506  | NS    | Caste-specific | 0.979332006  | 0.091962273     | 0.979332006 | 0.091962273 | 0.979332006 | 0.091962273 | 0.979332006 | 0.091962273 | 0.979332006 | 0.091962273  | 0.979332006 | 1     | 0.021877657 | 0.021877657 | XM 392689.0 |              |         |
| GB15921 | XM 393144 | 409646  | 110774937 | XP 393144.2 | 66549046  | NS    | Caste-specific | 0.816844421  | 0.158842453     | 0.816844421 | 0.158842453 | 0.816844421 | 0.158842453 | 0.816844421 | 0.158842453 | 0.816844421 | 0.158842453  | 0.816844421 | 1     | 0.504034083 | 0.504034083 | XM 393144.0 |              |         |
| GB17195 | XM 397211 | 410532  | 110759142 | XP 397211.2 | 66518219  | NS    | Caste-specific | 0.101645191  | 0.93623234      | 0.101645191 | 0.93623234  | 0.101645191 | 0.93623234  | 0.101645191 | 0.93623234  | 0.101645191 | 0.93623234   | 0.101645191 | 1     | 0.03623234  | 0.03623234  | XM 397211.0 |              |         |
| GB17724 | XM 392234 | 408699  | 110750975 | XP 392234.2 | 66505047  | NS    | Caste-specific | 0.85926079   | 0.105145201     | 0.85926079  | 0.105145201 | 0.85926079  | 0.105145201 | 0.85926079  | 0.105145201 | 0.85926079  | 0.105145201  | 0.85926079  | 1     | 0.235714808 | 0.235714808 | XM 392234.0 |              |         |
| GB16788 | XM 396987 | 413545  | 110775791 | XP 396987.3 | 110775792 | NS    | Caste-specific | 0.986002057  | 0.108475904     | 0.986002057 | 0.108475904 | 0.986002057 | 0.108475904 | 0.986002057 | 0.108475904 | 0.986002057 | 0.108475904  | 0.986002057 | 1     | 0.03226604  | 0.03226604  | XM 396987.0 |              |         |
| GB10730 | XM 392022 | 408476  | 110762905 | XP 392022.3 | 110762906 | NS    | Caste-specific | 0.94587692   | 0.987486048     | 0.94587692  | 0.987486048 | 0.94587692  | 0.987486048 | 0.94587692  | 0.987486048 | 0.94587692  | 0.987486048  | 0.94587692  | 1     | 0.062107893 | 0.062107893 | XM 392022.0 |              |         |
| GB11998 | XM 623676 | 551281  | 110759198 | XP 623679.1 | 66504938  | NS    | Caste-specific | 0.87516186   | 0.93718186      | 0.87516186  | 0.93718186  | 0.87516186  | 0.93718186  | 0.87516186  | 0.93718186  | 0.87516186  | 0.93718186   | 0.87516186  | 1     | 0.01751058  | 0.01751058  | XM 623676.0 |              |         |
| GB14619 | XM 392528 | 408996  | 110759646 | XP 392528.3 | 110759646 | NS    | Caste-specific | 0.922776621  | 0.117538628     | 0.922776621 | 0.117538628 | 0.922776621 | 0.117538628 | 0.922776621 | 0.117538628 | 0.922776621 | 0.117538628  | 0.922776621 | 1     | 0.141812053 | 0.141812053 | XM 392528.0 |              |         |
| GB18130 | XM 392751 | 413812  | 110755008 | XP 392751.3 | 110755009 | NS    | Caste-specific | 0.92787399   | 0.102570303     | 0.92787399  | 0.102570303 | 0.92787399  | 0.102570303 | 0.9278      |             |             |              |             |       |             |             |             |              |         |

[illegible]

[illegible]









| GB ID   | nucACC | Entrez | nucGI  | protACC   | protGI | Ureora   | CasteSio | Queen BAGEL | Sterile W BAGEL | Reo W BAGEL | ocContent   | coaContent  | coaO/E      | aocContent  | aocO/E      | nrGCcontent | nrCoGcontent | nrCoGO/E    | nrGoCContent | nrGoCO/E    | class       | O/SW        | loa2O/SW | AbsLoa2O/SW | RefSeqID     | version     |    |          |
|---------|--------|--------|--------|-----------|--------|----------|----------|-------------|-----------------|-------------|-------------|-------------|-------------|-------------|-------------|-------------|--------------|-------------|--------------|-------------|-------------|-------------|----------|-------------|--------------|-------------|----|----------|
| GB14283 | XM     | 625037 | 552661 | 110768877 | XP     | 625040.1 | 66537889 | SW          | Caste-specific  | 0.888036374 | 1.065625888 | 1.046337738 | 0.427364185 | 0.068826726 | 1.509107529 | 0.038438318 | 0.842805667  | 0.430431245 | 0.069611235  | 1.504281906 | 0.03887645  | 0.840110655 | HCG      | 0.833347223 | -0.263010361 | 0.263010361 | XM | 625037.2 |
| GB12095 | XM     | 625220 | 552844 | 110763527 | XP     | 625223.1 | 66525331 | NS          | Caste-qeneric   | 1.036176788 | 0.948029048 | 1.015794164 | 0.424982907 | 0.070276293 | 1.556677051 | 0.039937195 | 0.884641337  | 0.429329132 | 0.072419957  | 1.571936695 | 0.041165028 | 0.893521911 | HCG      | 1.092979999 | 0.128267001  | 0.128267001 | XM | 625220.2 |
| GB13661 | XM     | 396035 | 412580 | 66509946  | XP     | 396035.2 | 66509947 | NS          | Caste-qeneric   | 1.020337996 | 0.981405635 | 0.998256369 | 0.223003724 | 0.011175497 | 0.951718872 | 0.013245033 | 1.127963107  | 0.294460641 | 0.014645577  | 0.722799136 | 0.018746339 | 0.925182894 | LCG      | 1.039669999 | 0.056125677  | 0.056125677 | XM | 396035.2 |
| GB11969 | XM     | 395629 | 412166 | 110768055 | XP     | 395629.2 | 66534595 | O           | Caste-soecific  | 1.26483856  | 0.859791013 | 0.875370427 | 0.267735471 | 0.017241379 | 0.972782058 | 0.024057739 | 1.357370313  | 0.318983402 | 0.021331946  | 0.846931066 | 0.03069719  | 1.21875446  | LCG      | 1.471100001 | 0.55689532   | 0.55689532  | XM | 395629.3 |
| GB18242 | XM     | 623115 | 550724 | 110749945 | XP     | 623118.1 | 66501005 | NS          | Caste-qeneric   | 0.99906856  | 1.010037753 | 0.990893687 | 0.207322265 | 0.011411053 | 1.078181839 | 0.016009538 | 1.512673029  | 0.286637338 | 0.017439446  | 0.861322416 | 0.024221453 | 1.196281133 | HCG      | 0.989139819 | -0.015753629 | 0.015753629 | XM | 623115.2 |
| GB13965 | XM     | 393653 | 410169 | 110758579 | XP     | 393653.2 | 66556839 | SW          | Caste-specific  | 0.862909558 | 1.04188563  | 1.095204812 | 0.23502847  | 0.006087981 | 0.442321284 | 0.018656716 | 1.355500708  | 0.285823755 | 0.007956879  | 0.391539978 | 0.02412731  | 1.187250257 | LCG      | 0.82821908  | -0.271915656 | 0.271915656 | XM | 393653.3 |
| GB16028 | XM     | 396817 | 413372 | 110766862 | XP     | 396817.2 | 66532627 | NS          | Caste-qeneric   | 0.921474974 | 1.031618878 | 1.046906148 | 0.218546496 | 0.011462512 | 0.963630948 | 0.016255927 | 1.36660389   | 0.281010545 | 0.015943245  | 0.813140677 | 0.022579907 | 1.151625073 | LCG      | 0.893231981 | -0.162893189 | 0.162893189 | XM | 396817.3 |
