# Supplementary material
Source: PubMed Central journal article supplement (PMC2708677)
Supplement: 0900301106_ST1_PDF.pdf [file 0900301106_ST1_PDF.pdf]

**Table S1: Differential enrichment of functional terms for low-CpG and high-CpG genes.**

| CpG class | GO BP term                                                                  | Accession  | Fold enrichment<br>in class | Benjamini<br>significance <sup>1</sup> |
|-----------|-----------------------------------------------------------------------------|------------|-----------------------------|----------------------------------------|
| Low CpG   | macromolecule<br>metabolic process                                          | GO:0043170 | 1.13                        | 3.91E-14                               |
| Low CpG   | cellular metabolic<br>process                                               | GO:0044237 | 1.09                        | 1.04E-11                               |
| Low CpG   | metabolic process                                                           | GO:0008152 | 1.08                        | 1.20E-10                               |
| Low CpG   | primary metabolic<br>process                                                | GO:0044238 | 1.08                        | 8.05E-09                               |
| Low CpG   | cellular process                                                            | GO:0009987 | 1.04                        | 2.83E-08                               |
| Low CpG   | nucleobase, nucleoside,<br>nucleotide and nucleic<br>acid metabolic process | GO:0006139 | 1.17                        | 2.85E-08                               |
| Low CpG   | gene expression                                                             | GO:0010467 | 1.18                        | 3.15E-08                               |
| Low CpG   | RNA processing                                                              | GO:0006396 | 1.37                        | 1.05E-07                               |
| Low CpG   | biopolymer metabolic<br>process                                             | GO:0043283 | 1.12                        | 1.42E-06                               |
| Low CpG   | RNA metabolic process                                                       | GO:0016070 | 1.19                        | 2.28E-06                               |
| Low CpG   | macromolecule<br>biosynthetic process                                       | GO:0009059 | 1.28                        | 2.88E-06                               |
| Low CpG   | translation                                                                 | GO:0006412 | 1.32                        | 8.04E-06                               |
| Low CpG   | mRNA metabolic<br>process                                                   | GO:0016071 | 1.36                        | 2.58E-05                               |
| Low CpG   | cellular protein metabolic<br>process                                       | GO:0044267 | 1.13                        | 4.50E-05                               |
| Low CpG   | protein metabolic<br>process                                                | GO:0019538 | 1.12                        | 4.55E-05                               |
| Low CpG   | DNA metabolic process                                                       | GO:0006259 | 1.29                        | 0.0001                                 |
| Low CpG   | mRNA processing                                                             | GO:0006397 | 1.34                        | 0.0002                                 |
| Low CpG   | cellular macromolecule<br>metabolic process                                 | GO:0044260 | 1.11                        | 0.0004                                 |

|         |                                                          |            |      |        |
|---------|----------------------------------------------------------|------------|------|--------|
| Low CpG | macromolecular complex assembly                          | GO:0065003 | 1.29 | 0.0005 |
| Low CpG | biosynthetic process                                     | GO:0009058 | 1.16 | 0.0010 |
| Low CpG | cellular biosynthetic process                            | GO:0044249 | 1.18 | 0.0010 |
| Low CpG | tRNA metabolic process                                   | GO:0006399 | 1.56 | 0.0030 |
| Low CpG | cellular component assembly                              | GO:0022607 | 1.22 | 0.0060 |
| Low CpG | tRNA aminoacylation                                      | GO:0043039 | 1.66 | 0.0062 |
| Low CpG | tRNA aminoacylation for protein translation              | GO:0006418 | 1.66 | 0.0062 |
| Low CpG | transcription initiation from RNA polymerase II promoter | GO:0006367 | 1.50 | 0.0102 |
| Low CpG | ribonucleoprotein complex biogenesis and assembly        | GO:0022613 | 1.37 | 0.0139 |
| Low CpG | protein catabolic process                                | GO:0030163 | 1.44 | 0.0154 |
| Low CpG | transcription initiation                                 | GO:0006352 | 1.47 | 0.0162 |
| Low CpG | ribosome biogenesis and assembly                         | GO:0042254 | 1.53 | 0.0180 |
| Low CpG | response to DNA damage stimulus                          | GO:0006974 | 1.43 | 0.0199 |
| Low CpG | amino acid activation                                    | GO:0043038 | 1.60 | 0.0200 |
| Low CpG | protein-DNA complex assembly                             | GO:0065004 | 1.39 | 0.0242 |
| Low CpG | macromolecule catabolic process                          | GO:0009057 | 1.28 | 0.0323 |
| Low CpG | DNA repair                                               | GO:0006281 | 1.44 | 0.0329 |
| Low CpG | intracellular transport                                  | GO:0046907 | 1.17 | 0.0330 |
| Low CpG | protein transport                                        | GO:0015031 | 1.19 | 0.0368 |
| Low CpG | organelle organization and biogenesis                    | GO:0006996 | 1.12 | 0.0438 |

|          |                                                  |            |      |          |
|----------|--------------------------------------------------|------------|------|----------|
| Low CpG  | cofactor biosynthetic process                    | GO:0051188 | 1.40 | 0.0482   |
| High CpG | multicellular organismal process                 | GO:0032501 | 1.32 | 1.20E-19 |
| High CpG | cell communication                               | GO:0007154 | 1.37 | 4.10E-16 |
| High CpG | organ development                                | GO:0048513 | 1.41 | 1.52E-11 |
| High CpG | system development                               | GO:0048731 | 1.35 | 1.54E-11 |
| High CpG | signal transduction                              | GO:0007165 | 1.35 | 1.71E-11 |
| High CpG | multicellular organismal development             | GO:0007275 | 1.28 | 2.92E-11 |
| High CpG | biological adhesion                              | GO:0022610 | 1.77 | 7.40E-11 |
| High CpG | cell adhesion                                    | GO:0007155 | 1.77 | 7.40E-11 |
| High CpG | anatomical structure development                 | GO:0048856 | 1.30 | 9.39E-11 |
| High CpG | developmental process                            | GO:0032502 | 1.23 | 1.99E-09 |
| High CpG | tissue development                               | GO:0009888 | 1.72 | 5.95E-09 |
| High CpG | system process                                   | GO:0003008 | 1.52 | 6.05E-09 |
| High CpG | cell-cell adhesion                               | GO:0016337 | 2.04 | 6.16E-08 |
| High CpG | behavior                                         | GO:0007610 | 1.68 | 6.25E-08 |
| High CpG | imaginal disc development                        | GO:0007444 | 1.49 | 1.04E-07 |
| High CpG | cell surface receptor linked signal transduction | GO:0007166 | 1.44 | 2.39E-07 |
| High CpG | anatomical structure morphogenesis               | GO:0009653 | 1.30 | 3.28E-07 |
| High CpG | cell-cell signaling                              | GO:0007267 | 1.53 | 3.32E-07 |
| High CpG | neurological system process                      | GO:0050877 | 1.48 | 4.39E-07 |
| High CpG | larval development                               | GO:0002164 | 1.46 | 9.93E-07 |
| High CpG | mesoderm development                             | GO:0007498 | 1.93 | 1.10E-06 |
| High CpG | ion transport                                    | GO:0006811 | 1.57 | 2.30E-06 |
| High CpG | transmission of nerve impulse                    | GO:0019226 | 1.53 | 4.83E-06 |

|          |                                                            |            |      |          |
|----------|------------------------------------------------------------|------------|------|----------|
| High CpG | cell migration                                             | GO:0016477 | 1.59 | 5.99E-06 |
| High CpG | appendage development                                      | GO:0048736 | 1.62 | 6.62E-06 |
| High CpG | organ morphogenesis                                        | GO:0009887 | 1.41 | 7.84E-06 |
| High CpG | metal ion transport                                        | GO:0030001 | 1.85 | 7.86E-06 |
| High CpG | imaginal disc-derived<br>appendage development             | GO:0048737 | 1.61 | 9.75E-06 |
| High CpG | nervous system<br>development                              | GO:0007399 | 1.37 | 9.90E-06 |
| High CpG | larval development<br>(sensu Amphibia)                     | GO:0002117 | 1.45 | 1.14E-05 |
| High CpG | metamorphosis                                              | GO:0007552 | 1.45 | 1.14E-05 |
| High CpG | appendage<br>morphogenesis                                 | GO:0035107 | 1.61 | 1.40E-05 |
| High CpG | imaginal disc<br>morphogenesis                             | GO:0007560 | 1.45 | 1.55E-05 |
| High CpG | imaginal disc-derived<br>appendage<br>morphogenesis        | GO:0035114 | 1.60 | 2.15E-05 |
| High CpG | G-protein coupled<br>receptor protein<br>signaling pathway | GO:0007186 | 1.73 | 2.24E-05 |
| High CpG | pattern specification<br>process                           | GO:0007389 | 1.47 | 4.56E-05 |
| High CpG | central nervous system<br>development                      | GO:0007417 | 1.69 | 7.22E-05 |
| High CpG | localization of cell                                       | GO:0051674 | 1.49 | 9.07E-05 |
| High CpG | regionalization                                            | GO:0003002 | 1.47 | 9.33E-05 |
| High CpG | post-embryonic<br>development                              | GO:0009791 | 1.34 | 0.0001   |
| High CpG | locomotory behavior                                        | GO:0007626 | 1.83 | 0.0001   |
| High CpG | cell motility                                              | GO:0006928 | 1.48 | 0.0001   |
| High CpG | anatomical structure<br>formation                          | GO:0048646 | 1.58 | 0.0002   |
| High CpG | axon guidance                                              | GO:0007411 | 1.72 | 0.0002   |

|          |                                                  |            |      |        |
|----------|--------------------------------------------------|------------|------|--------|
| High CpG | cation transport                                 | GO:0006812 | 1.55 | 0.0002 |
| High CpG | axonogenesis                                     | GO:0007409 | 1.61 | 0.0002 |
| High CpG | ectoderm development                             | GO:0007398 | 1.69 | 0.0002 |
| High CpG | homophilic cell adhesion                         | GO:0007156 | 2.28 | 0.0003 |
| High CpG | imaginal disc-derived<br>wing morphogenesis      | GO:0007476 | 1.55 | 0.0004 |
| High CpG | heart development                                | GO:0007507 | 1.93 | 0.0006 |
| High CpG | wing disc development                            | GO:0035220 | 1.50 | 0.0007 |
| High CpG | segmentation                                     | GO:0035282 | 1.71 | 0.0007 |
| High CpG | muscle system process                            | GO:0003012 | 2.05 | 0.0007 |
| High CpG | muscle contraction                               | GO:0006936 | 2.05 | 0.0007 |
| High CpG | wing disc<br>morphogenesis                       | GO:0007472 | 1.52 | 0.0009 |
| High CpG | instar larval or pupal<br>development            | GO:0002165 | 1.31 | 0.0012 |
| High CpG | localization                                     | GO:0051179 | 1.14 | 0.0014 |
| High CpG | cellular developmental<br>process                | GO:0048869 | 1.21 | 0.0015 |
| High CpG | cell differentiation                             | GO:0030154 | 1.21 | 0.0016 |
| High CpG | synaptic transmission                            | GO:0007268 | 1.44 | 0.0021 |
| High CpG | cellular morphogenesis<br>during differentiation | GO:0000904 | 1.38 | 0.0024 |
| High CpG | cell morphogenesis                               | GO:0000902 | 1.27 | 0.0024 |
| High CpG | cellular structure<br>morphogenesis              | GO:0032989 | 1.27 | 0.0024 |
| High CpG | neurogenesis                                     | GO:0022008 | 1.36 | 0.0028 |
| High CpG | cell fate commitment                             | GO:0045165 | 1.47 | 0.0028 |
| High CpG | potassium ion transport                          | GO:0006813 | 2.08 | 0.0030 |
| High CpG | sensory organ<br>development                     | GO:0007423 | 1.38 | 0.0032 |
| High CpG | leg disc development                             | GO:0035218 | 2.16 | 0.0037 |
| High CpG | imaginal disc pattern<br>formation               | GO:0007447 | 1.85 | 0.0037 |
| High CpG | calcium ion transport                            | GO:0006816 | 2.26 | 0.0041 |

|          |                                                 |            |      |        |
|----------|-------------------------------------------------|------------|------|--------|
| High CpG | adult behavior                                  | GO:0030534 | 1.92 | 0.0041 |
| High CpG | open tracheal system<br>development             | GO:0007424 | 1.50 | 0.0051 |
| High CpG | generation of neurons                           | GO:0048699 | 1.35 | 0.0053 |
| High CpG | cuticle development                             | GO:0042335 | 1.90 | 0.0074 |
| High CpG | rhythmic process                                | GO:0048511 | 1.90 | 0.0074 |
| High CpG | circadian rhythm                                | GO:0007623 | 1.90 | 0.0074 |
| High CpG | response to chemical<br>stimulus                | GO:0042221 | 1.44 | 0.0076 |
| High CpG | striated muscle<br>development                  | GO:0014706 | 1.68 | 0.0079 |
| High CpG | calcium-dependent cell-<br>cell adhesion        | GO:0016339 | 2.40 | 0.0081 |
| High CpG | cell fate determination                         | GO:0001709 | 1.64 | 0.0092 |
| High CpG | limb development                                | GO:0060173 | 2.05 | 0.0099 |
| High CpG | di-, tri-valent inorganic<br>cation transport   | GO:0015674 | 2.05 | 0.0099 |
| High CpG | leg morphogenesis                               | GO:0035110 | 2.05 | 0.0099 |
| High CpG | limb morphogenesis                              | GO:0035108 | 2.05 | 0.0099 |
| High CpG | reproduction                                    | GO:0000003 | 1.25 | 0.0099 |
| High CpG | cell development                                | GO:0048468 | 1.20 | 0.0105 |
| High CpG | muscle development                              | GO:0007517 | 1.47 | 0.0145 |
| High CpG | aromatic amino acid<br>family metabolic process | GO:0009072 | 2.40 | 0.0161 |
| High CpG | dorsal/ventral pattern<br>formation             | GO:0009953 | 1.67 | 0.0176 |
| High CpG | neuron differentiation                          | GO:0030182 | 1.34 | 0.0184 |
| High CpG | neurite morphogenesis                           | GO:0048812 | 1.35 | 0.0205 |
| High CpG | neurite development                             | GO:0031175 | 1.35 | 0.0205 |
| High CpG | neuron morphogenesis<br>during differentiation  | GO:0048667 | 1.35 | 0.0205 |
| High CpG | eye development                                 | GO:0001654 | 1.36 | 0.0212 |
| High CpG | regulation of<br>developmental process          | GO:0050793 | 1.37 | 0.0228 |

|          |                                                   |            |      |        |
|----------|---------------------------------------------------|------------|------|--------|
| High CpG | reproductive process                              | GO:0022414 | 1.52 | 0.0263 |
| High CpG | cell projection<br>organization and<br>biogenesis | GO:0030030 | 1.30 | 0.0280 |
| High CpG | cell projection<br>morphogenesis                  | GO:0048858 | 1.30 | 0.0280 |
| High CpG | cell part morphogenesis                           | GO:0032990 | 1.30 | 0.0280 |
| High CpG | skeletal muscle<br>development                    | GO:0007519 | 1.63 | 0.0286 |
| High CpG | blastoderm<br>segmentation                        | GO:0007350 | 1.62 | 0.0292 |
| High CpG | response to stimulus                              | GO:0050896 | 1.19 | 0.0317 |
| High CpG | neuron development                                | GO:0048666 | 1.33 | 0.0321 |
| High CpG | germarium-derived egg<br>chamber formation        | GO:0007293 | 1.84 | 0.0321 |
| High CpG | response to external<br>stimulus                  | GO:0009605 | 1.52 | 0.0359 |
| High CpG | ventral cord<br>development                       | GO:0007419 | 2.10 | 0.0400 |
| High CpG | rhythmic behavior                                 | GO:0007622 | 1.88 | 0.0466 |

---

Gene ontology biological process term enrichment is presented based on 1781 *D. melanogaster* orthologs of *A. mellifera* high CpG genes (1230 with GO annotation) and 2531 *D. melanogaster* orthologs of *A. mellifera* low CpG genes (1713 with GO annotation).

<sup>1</sup>Significance is denoted by a Benjamini correction for multiple testing.
